# Supplementary material for: Chlamydia pneumoniae Is Genetically Diverse in Animals and Appears to Have Crossed the Host Barrier to Humans on (At Least) Two Occasions
Source: PubMed Central journal article supplement (PMC2873915; doi:10.1371/journal.ppat.1000903), 2010-05-20

|          | 1          | 10         | 20         | 30         | 40 | 50         |
|----------|------------|------------|------------|------------|----|------------|
| Identity |            |            |            |            |    |            |
| B26      | AATAGCTTTC | CTTTAGAGGA | AGTTGCCATT | CCCATCCT   | AC | CAGGTTATCA |
| B37      | AATAGCTTTC | CTTTAGAGGA | AGTTGCCATT | CCCATCCT   | AC | CAGGTTATCA |
| LPCoLN   | AATAGCTTTC | CTTTAGAGGA | AGTTGCCATT | CCCATCCT   | AC | CAGGTTATCA |
| DE177    | AATAGCTTTC | CTTTAGAGGA | AGTTGCCATT | CCCATCCT   | AC | CAGGTTATCA |
| AR39     | AATAGCTTTC | CTTTAGAGGA | AGTTGCCATT | CCCATCCTGC |    | CAGGTTATCA |
| AR39-2   | AATAGCTTTC | CTTTAGAGGA | AGTTGCCATT | CCCATCCTGC |    | CAGGTTATCA |
| CWL029   | AATAGCTTTC | CTTTAGAGGA | AGTTGCCATT | CCCATCCTGC |    | CAGGTTATCA |
| J138     | AATAGCTTTC | CTTTAGAGGA | AGTTGCCATT | CCCATCCTGC |    | CAGGTTATCA |
| TW183    | AATAGCTTTC | CTTTAGAGGA | AGTTGCCATT | CCCATCCTGC |    | CAGGTTATCA |
| IOL207   | AATAGCTTTC | CTTTAGAGGA | AGTTGCCATT | CCCATCCTGC |    | CAGGTTATCA |
| TOR1     | AATAGCTTTC | CTTTAGAGGA | AGTTGCCATT | CCCATCCTGC |    | CAGGTTATCA |
| WA97001  | AATAGCTTTC | CTTTAGAGGA | AGTTGCCATT | CCCATCCTGC |    | CAGGTTATCA |
| 1979     | AATAGCTTTC | CTTTAGAGGA | AGTTGCCATT | CCCATCCTGC |    | CAGGTTATCA |
| SH511    | AATAGCTTTC | CTTTAGAGGA | AGTTGCCATT | CCCATCCTGC |    | CAGGTTATCA |

|          | 60         | 70         | 80         | 90         | 100        |
|----------|------------|------------|------------|------------|------------|
| Identity |            |            |            |            |            |
| B26      | CCCTAAGTTT | TATTTATCTT | TCATAGATAG | GGACGATCAA | GGTGTCCACT |
| B37      | CCCTAAGTTT | TATTTATCTT | TCATAGATAG | GGACGATCAA | GGTGTCCACT |
| LPCoLN   | CCCTAAGTTT | TATTTATCTT | TCATAGATAG | GGACGATCAA | GGTGTCCACT |
| DE177    | CCCTAAGTTT | TATTTATCTT | TCATAGATAG | GGACGATCAA | GGTGTCCACT |
| AR39     | CCCTAAGTTT | TATTTATCTT | TCATAGATAG | GGACGATCAA | GGTGTCCACT |
| AR39-2   | CCCTAAGTTT | TATTTATCTT | TCATAGATAG | GGACGATCAA | GGTGTCCACT |
| CWL029   | CCCTAAGTTT | TATTTATCTT | TCATAGATAG | GGACGATCAA | GGTGTCCACT |
| J138     | CCCTAAGTTT | TATTTATCTT | TCATAGATAG | GGACGATCAA | GGTGTCCACT |
| TW183    | CCCTAAGTTT | TATTTATCTT | TCATAGATAG | GGACGATCAA | GGTGTCCACT |
| IOL207   | CCCTAAGTTT | TATTTATCTT | TCATAGATAG | GGACGATCAA | GGTGTCCACT |
| TOR1     | CCCTAAGTTT | TATTTATCTT | TCATAGATAG | GGACGATCAA | GGTGTCCACT |
| WA97001  | CCCTAAGTTT | TATTTATCTT | TCATAGATAG | GGACGATCAA | GGTGTCCACT |
| 1979     | CCCTAAGTTT | TATTTATCTT | TCATAGATAG | GGACGATCAA | GGTGTCCACT |
| SH511    | CCCTAAGTTT | TATTTATCTT | TCATAGATAG | GGACGATCAA | GGTGTCCACT |

|          | 110        | 120        | 130        | 140        | 150        |
|----------|------------|------------|------------|------------|------------|
| Identity |            |            |            |            |            |
| B26      | ATGAAGTTTT | AGATGGCGTA | TTTTTAAAGA | CAGTCGCTGC | TTGTATTATA |
| B37      | ATGAAGTTTT | AGATGGCGTA | TTTTTAAAGA | CAGTCGCTGC | TTGTATTATA |
| LPCoLN   | ATGAAGTTTT | AGATGGCGTA | TTTTTAAAGA | CAGTCGCTGC | TTGTATTATA |
| DE177    | ATGAAGTTTT | AGATGGCGTA | TTTTTAAAGA | CAGTCGCTGC | TTGTATTATA |
| AR39     | ATGAAGTTTT | AGATGGCGTA | TTTTTAAAGA | CAGTCGCTGC | TTGTATTATA |
| AR39-2   | ATGAAGTTTT | AGATGGCGTA | TTTTTAAAGA | CAGTCGCTGC | TTGTATTATA |
| CWL029   | ATGAAGTTTT | AGATGGCGTA | TTTTTAAAGA | CAGTCGCTGC | TTGTATTATA |
| J138     | ATGAAGTTTT | AGATGGCGTA | TTTTTAAAGA | CAGTCGCTGC | TTGTATTATA |
| TW183    | ATGAAGTTTT | AGATGGCGTA | TTTTTAAAGA | CAGTCGCTGC | TTGTATTATA |
| IOL207   | ATGAAGTTTT | AGATGGCGTA | TTTTTAAAGA | CAGTCGCTGC | TTGTATTATA |
| TOR1     | ATGAAGTTTT | AGATGGCGTA | TTTTTAAAGA | CAGTCGCTGC | TTGTATTATA |
| WA97001  | ATGAAGTTTT | AGATGGCGTA | TTTTTAAAGA | CAGTCGCTGC | TTGTATTATA |
| 1979     | ATGAAGTTTT | AGATGGCGTA | TTTTTAAAGA | CAGTCGCTGC | TTGTATTATA |
| SH511    | ATGAAGTTTT | AGATGGCGTA | TTTTTAAAGA | CAGTCGCTGC | TTGTATTATA |

| Identity | 160        | 170        | 180        | 190        | 200        |
|----------|------------|------------|------------|------------|------------|
| B26      | GAGAACTCCT | TCTTAACTGA | TTCTATGAGC | CCGGAGCTTC | TCAGCGAAGT |
| B37      | GAGAACTCCT | TCTTAACTGA | TTCTATGAGC | CCGGAGCTTC | TCAGCGAAGT |
| LPCoLN   | GAGAACTCCT | TCTTAACTGA | TTCTATGAGC | CCGGAGCTTC | TCAGCGAAGT |
| DE177    | GAGAACTCCT | TCTTAACTGA | TTCTATGAGC | CCGGAGCTTC | TCAGCGAAGT |
| AR39     | GAGAACTCCT | TCTTAACTGA | TTCTATGAGC | CCGGAGCTTC | TCAGCGAAGT |
| AR39-2   | GAGAACTCCT | TCTTAACTGA | TTCTATGAGC | CCGGAGCTTC | TCAGCGAAGT |
| CWL029   | GAGAACTCCT | TCTTAACTGA | TTCTATGAGC | CCGGAGCTTC | TCAGCGAAGT |
| J138     | GAGAACTCCT | TCTTAACTGA | TTCTATGAGC | CCGGAGCTTC | TCAGCGAAGT |
| TW183    | GAGAACTCCT | TCTTAACTGA | TTCTATGAGC | CCGGAGCTTC | TCAGCGAAGT |
| IOL207   | GAGAACTCCT | TCTTAACTGA | TTCTATGAGC | CCGGAGCTTC | TCAGCGAAGT |
| TOR1     | GAGAACTCCT | TCTTAACTGA | TTCTATGAGC | CCGGAGCTTC | TCAGCGAAGT |
| WA97001  | GAGAACTCCT | TCTTAACTGA | TTCTATGAGC | CCGGAGCTTC | TCAGCGAAGT |
| 1979     | GAGAACTCCT | TCTTAACTGA | TTCTATGAGC | CCGGAGCTTC | TCAGCGAAGT |
| SH511    | GAGAACTCCT | TCTTAACTGA | TTCTATGAGC | CCGGAGCTTC | TCAGCGAAGT |

| Identity | 210        | 220       | 230          | 240         | 250        |
|----------|------------|-----------|--------------|-------------|------------|
| B26      | TAAGGAAGCT | CTGAAACGA | A GTTCTGAAAC | TGGAAATGCGC | TATTTCATAG |
| B37      | TAAGGAAGCT | CTGAAACGA | A GTTCTGAAAC | TGGAAATGCGC | TATTTCATAG |
| LPCoLN   | TAAGGAAGCT | CTGAAACGA | A GTTCTGAAAC | TGGAAATGCGC | TATTTCATAG |
| DE177    | TAAGGAAGCT | CTGAAACGA | A GTTCTGAAAC | TGGAAATGCGC | TATTTCATAG |
| AR39     | TAAGGAAGCT | CTGAAACGA | -            | -           | -          |
| AR39-2   | TAAGGAAGCT | CTGAAACGA | -            | -           | -          |
| CWL029   | TAAGGAAGCT | CTGAAACGA | -            | -           | -          |
| J138     | TAAGGAAGCT | CTGAAACGA | -            | -           | -          |
| TW183    | TAAGGAAGCT | CTGAAACGA | -            | -           | -          |
| IOL207   | TAAGGAAGCT | CTGAAACGA | -            | -           | -          |
| TOR1     | TAAGGAAGCT | CTGAAACGA | -            | -           | -          |
| WA97001  | TAAGGAAGCT | CTGAAACGA | -            | -           | -          |
| 1979     | TAAGGAAGCT | CTGAAACGA | -            | -           | -          |
| SH511    | TAAGGAAGCT | CTGAAACGA | -            | -           | -          |

| Identity | 260         | 270        | 280        | 290        | 300        |
|----------|-------------|------------|------------|------------|------------|
| B26      | GATCAGAACCA | TTCTAAGAAT | CTAATGACAG | GATCTAATTC | TTTTGAACTT |
| B37      | GATCAGAACCA | TTCTAAGAAT | CTAATGACAG | GATCTAATTC | TTTTGAACTT |
| LPCoLN   | GATCAGAACCA | TTCTAAGAAT | CTAATGACAG | GATCTAATTC | TTTTGAACTT |
| DE177    | GATCAGAACCA | TTCTAAGAAT | CTAATGACAG | GATCTAATTC | TTTTGAACTT |
| AR39     | -           | -          | -          | -          | -          |
| AR39-2   | -           | -          | -          | -          | -          |
| CWL029   | -           | -          | -          | -          | -          |
| J138     | -           | -          | -          | -          | -          |
| TW183    | -           | -          | -          | -          | -          |
| IOL207   | -           | -          | -          | -          | -          |
| TOR1     | -           | -          | -          | -          | -          |
| WA97001  | -           | -          | -          | -          | -          |
| 1979     | -           | -          | -          | -          | -          |
| SH511    | -           | -          | -          | -          | -          |

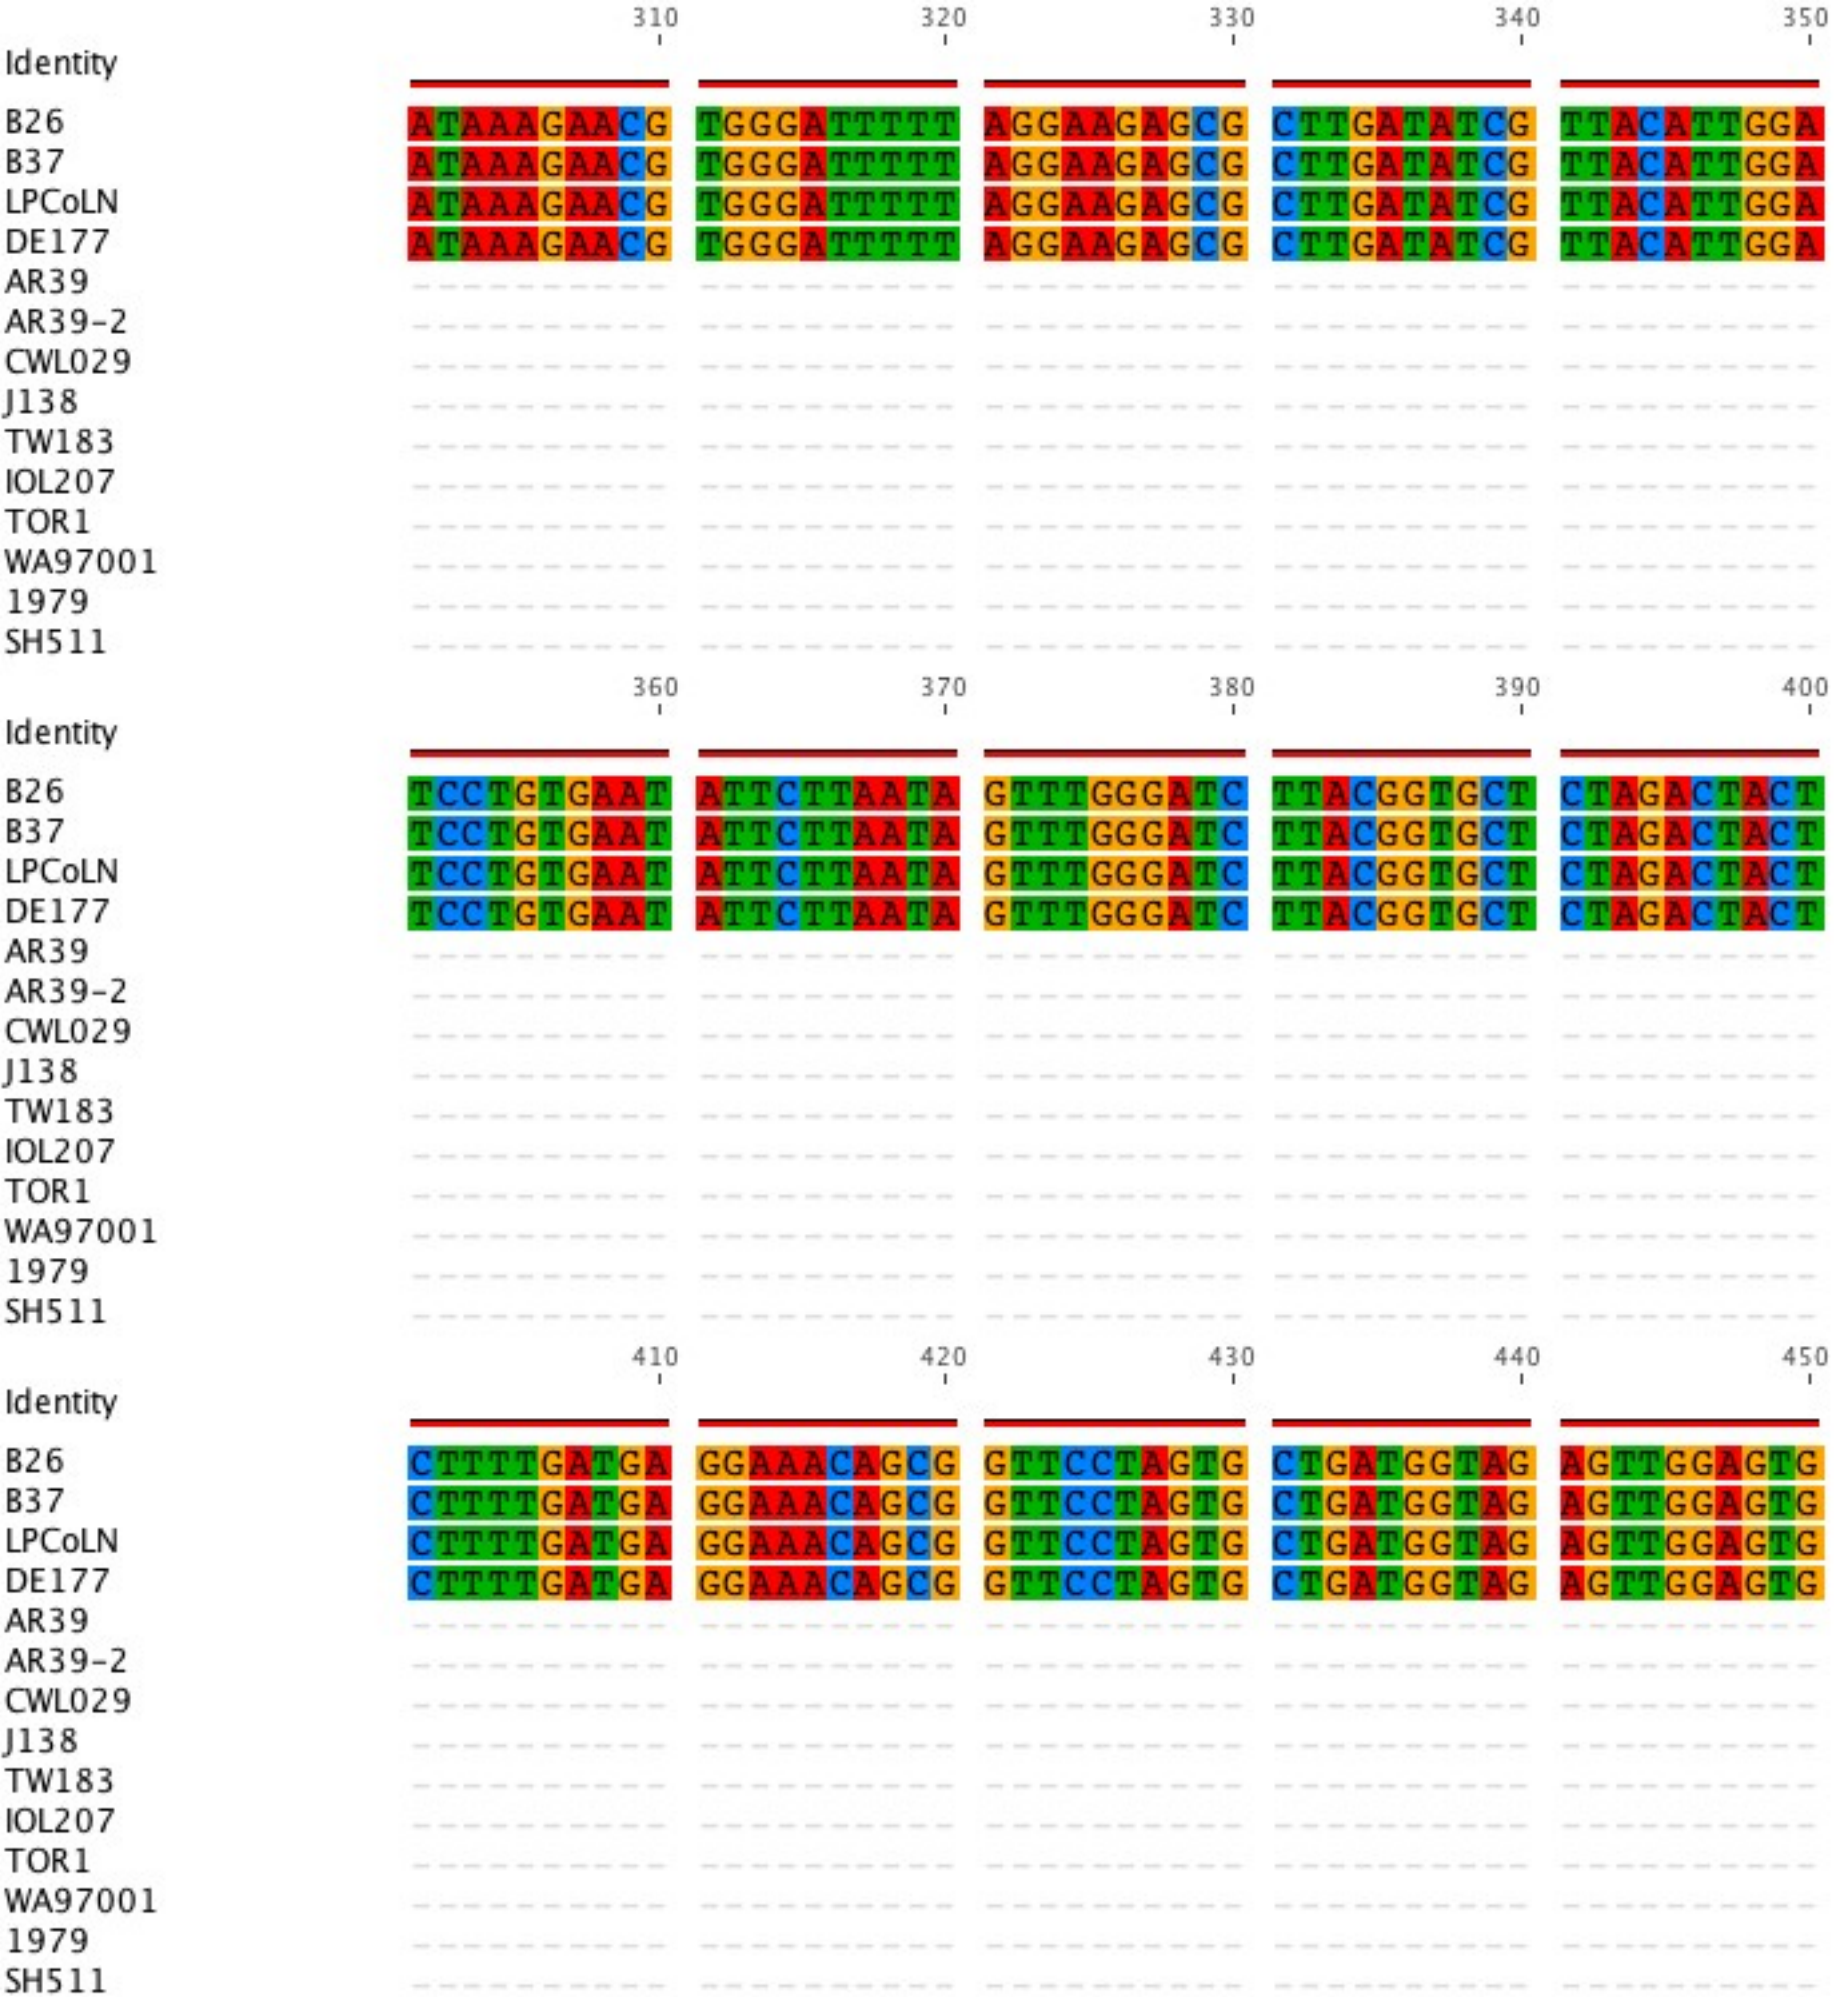

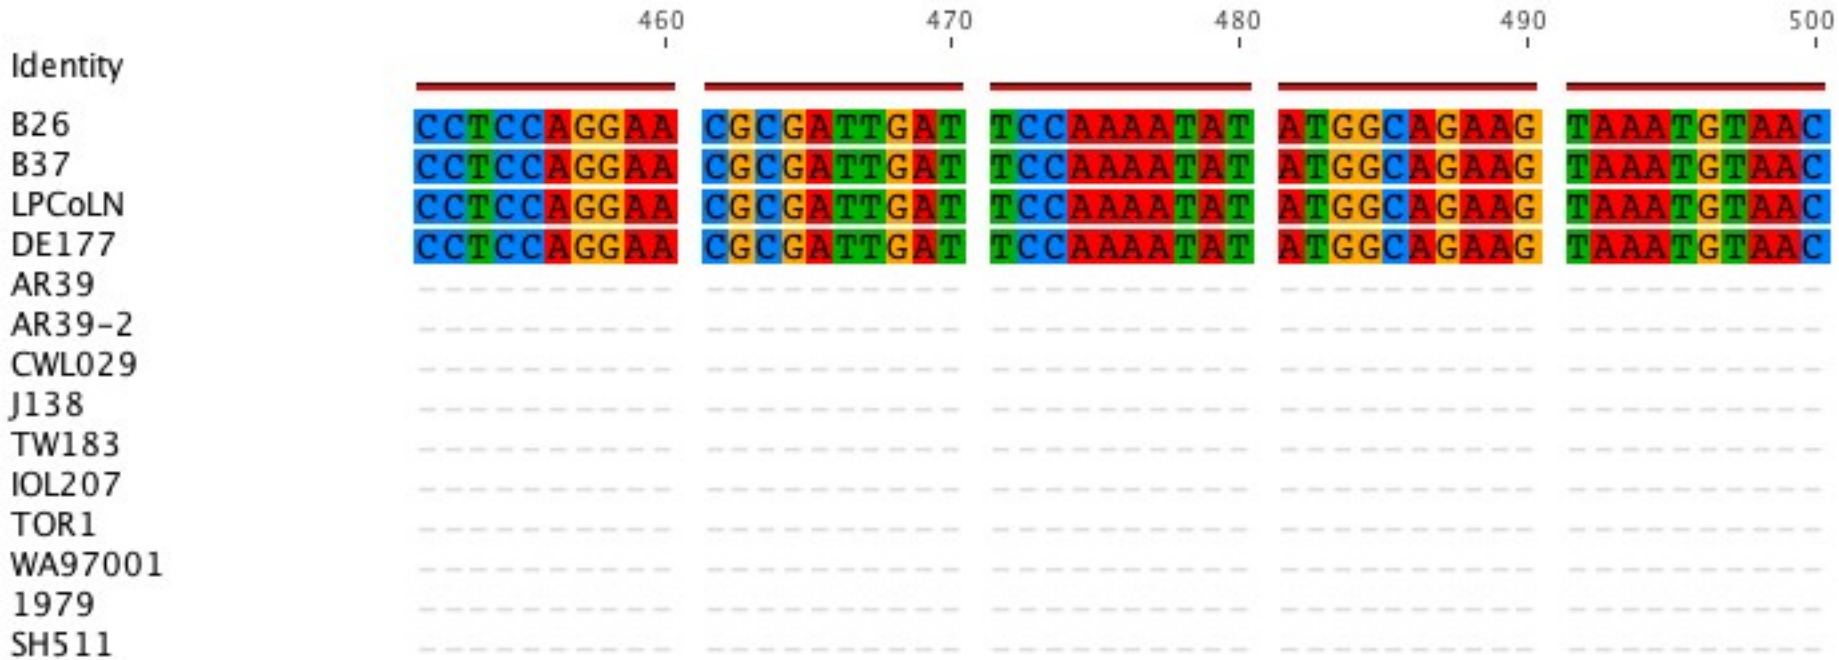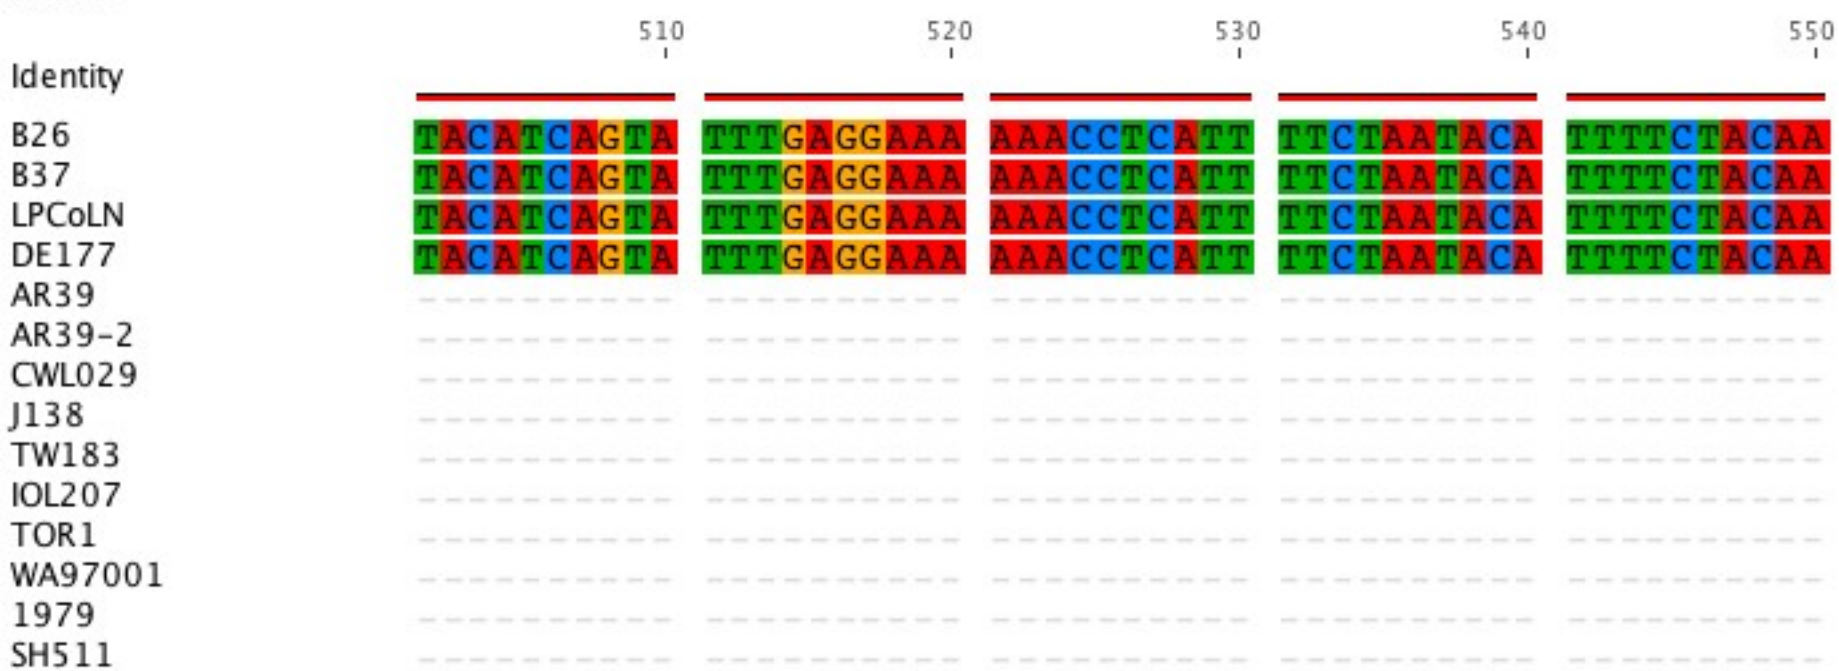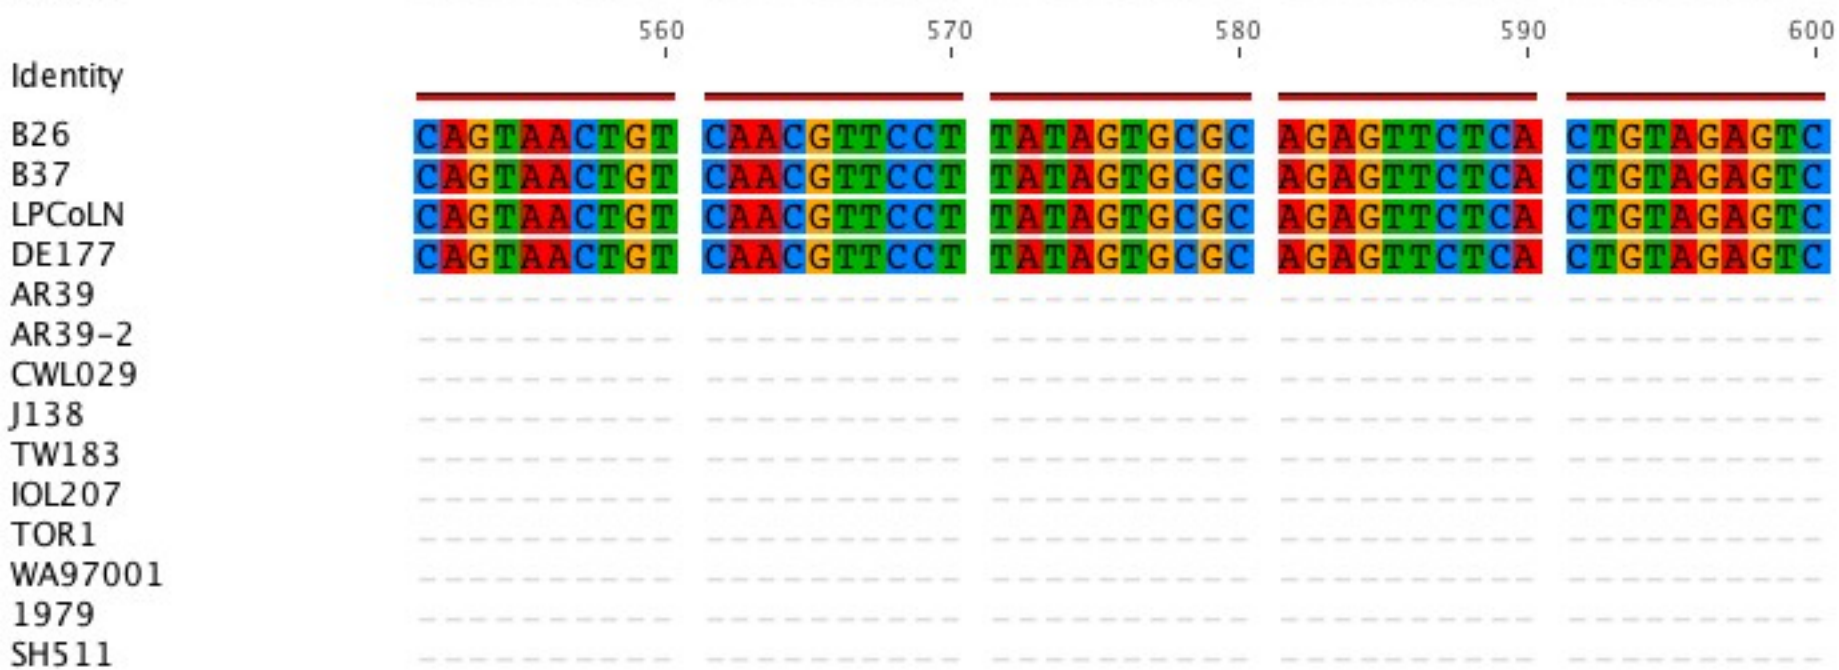

| Identity | 610                | 620                | 630                | 640                | 650                |
|----------|--------------------|--------------------|--------------------|--------------------|--------------------|
| B26      | GGG <b>TGTGTAG</b> | CTGGG <b>AACTC</b> | TAAAG <b>AAATT</b> | GGAG <b>TCGTGA</b> | GACG <b>CCAACT</b> |
| B37      | GGG <b>TGTGTAG</b> | CTGGG <b>AACTC</b> | TAAAG <b>AAATT</b> | GGAG <b>TCGTGA</b> | GACG <b>CCAACT</b> |
| LPCoLN   | GGG <b>TGTGTAG</b> | CTGGG <b>AACTC</b> | TAAAG <b>AAATT</b> | GGAG <b>TCGTGA</b> | GACG <b>CCAACT</b> |
| DE177    | GGG <b>TGTGTAG</b> | CTGGG <b>AACTC</b> | TAAAG <b>AAATT</b> | GGAG <b>TCGTGA</b> | GACG <b>CCAACT</b> |
| AR39     | -----              | -----              | -----              | -----              | -----              |
| AR39-2   | -----              | -----              | -----              | -----              | -----              |
| CWL029   | -----              | -----              | -----              | -----              | -----              |
| J138     | -----              | -----              | -----              | -----              | -----              |
| TW183    | -----              | -----              | -----              | -----              | -----              |
| IOL207   | -----              | -----              | -----              | -----              | -----              |
| TOR1     | -----              | -----              | -----              | -----              | -----              |
| WA97001  | -----              | -----              | -----              | -----              | -----              |
| 1979     | -----              | -----              | -----              | -----              | -----              |
| SH511    | -----              | -----              | -----              | -----              | -----              |

| Identity | 660                | 670                 | 680                 | 690                | 700                |
|----------|--------------------|---------------------|---------------------|--------------------|--------------------|
| B26      | TTT <b>CCCTAGT</b> | TAT <b>GTCCC</b> GA | AGT <b>TACC</b> AGA | TTT <b>AGTAAAG</b> | AAG <b>TATAAAA</b> |
| B37      | TTT <b>CCCTAGT</b> | TAT <b>GTCCC</b> GA | AGT <b>TACC</b> AGA | TTT <b>AGTAAAG</b> | AAG <b>TATAAAA</b> |
| LPCoLN   | TTT <b>CCCTAGT</b> | TAT <b>GTCCC</b> GA | AGT <b>TACC</b> AGA | TTT <b>AGTAAAG</b> | AAG <b>TATAAAA</b> |
| DE177    | TTT <b>CCCTAGT</b> | TAT <b>GTCCC</b> GA | AGT <b>TACC</b> AGA | TTT <b>AGTAAAG</b> | AAG <b>TATAAAA</b> |
| AR39     | -----              | -----               | -----               | -----              | -----              |
| AR39-2   | -----              | -----               | -----               | -----              | -----              |
| CWL029   | -----              | -----               | -----               | -----              | -----              |
| J138     | -----              | -----               | -----               | -----              | -----              |
| TW183    | -----              | -----               | -----               | -----              | -----              |
| IOL207   | -----              | -----               | -----               | -----              | -----              |
| TOR1     | -----              | -----               | -----               | -----              | -----              |
| WA97001  | -----              | -----               | -----               | -----              | -----              |
| 1979     | -----              | -----               | -----               | -----              | -----              |
| SH511    | -----              | -----               | -----               | -----              | -----              |

| Identity | 710                 | 720                 | 730                 | 740                 | 750                 |
|----------|---------------------|---------------------|---------------------|---------------------|---------------------|
| B26      | GAT <b>CAGCAA</b> A | AAT <b>CTTAA</b> TT | AAT <b>AAGATA</b> A | G <b>CTTTGG</b> AAA | TAT <b>TTGGC</b> GT |
| B37      | GAT <b>CAGCAA</b> A | AAT <b>CTTAA</b> TT | AAT <b>AAGATA</b> A | G <b>CTTTGG</b> AAA | TAT <b>TTGGC</b> GT |
| LPCoLN   | GAT <b>CAGCAA</b> A | AAT <b>CTTAA</b> TT | AAT <b>AAGATA</b> A | G <b>CTTTGG</b> AAA | TAT <b>TTGGC</b> GT |
| DE177    | GAT <b>CAGCAA</b> A | AAT <b>CTTAA</b> TT | AAT <b>AAGATA</b> A | G <b>CTTTGG</b> AAA | TAT <b>TTGGC</b> GT |
| AR39     | -----               | -----               | -----               | -----               | -----               |
| AR39-2   | -----               | -----               | -----               | -----               | -----               |
| CWL029   | -----               | -----               | -----               | -----               | -----               |
| J138     | -----               | -----               | -----               | -----               | -----               |
| TW183    | -----               | -----               | -----               | -----               | -----               |
| IOL207   | -----               | -----               | -----               | -----               | -----               |
| TOR1     | -----               | -----               | -----               | -----               | -----               |
| WA97001  | -----               | -----               | -----               | -----               | -----               |
| 1979     | -----               | -----               | -----               | -----               | -----               |
| SH511    | -----               | -----               | -----               | -----               | -----               |

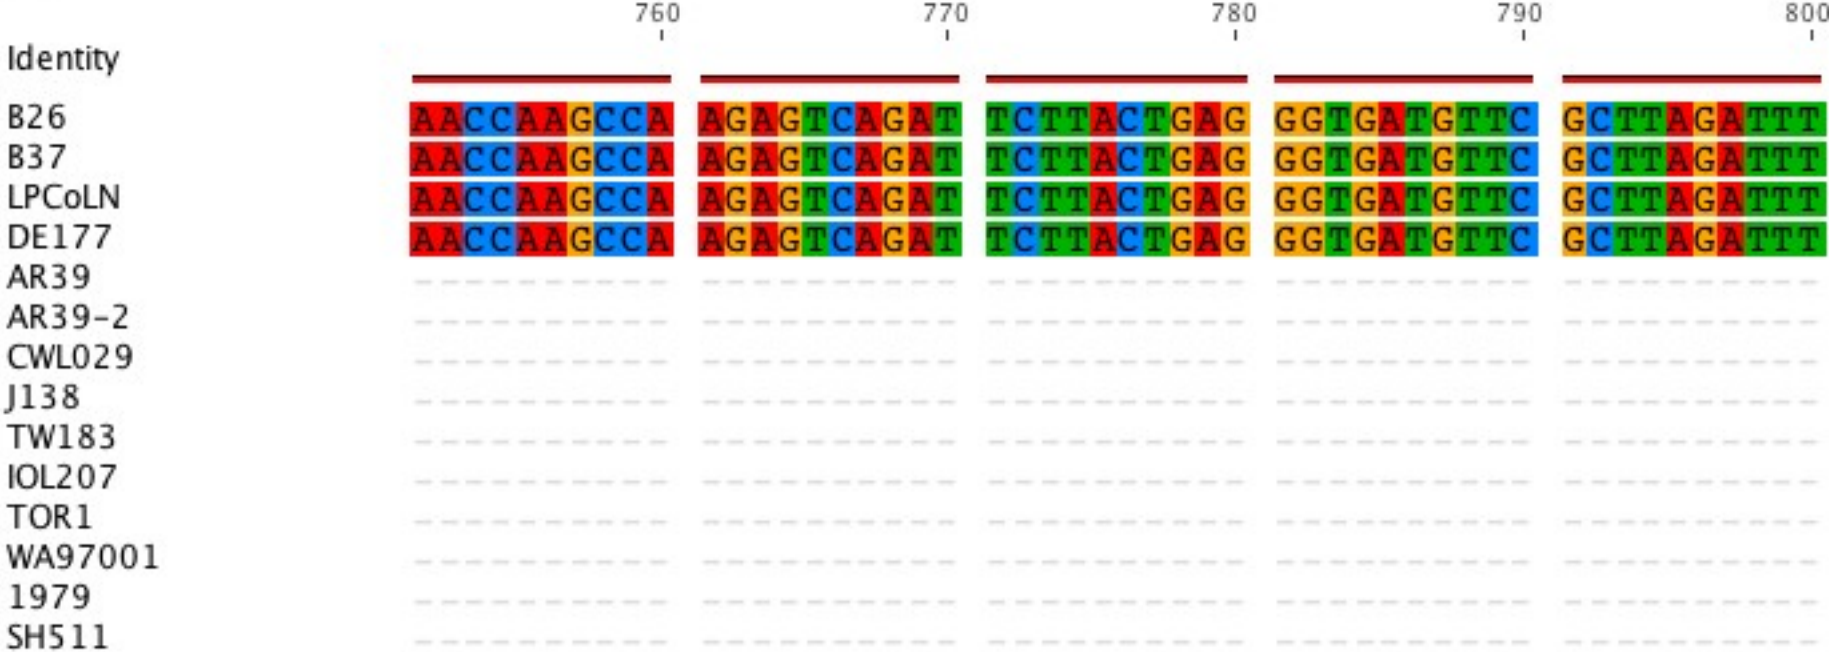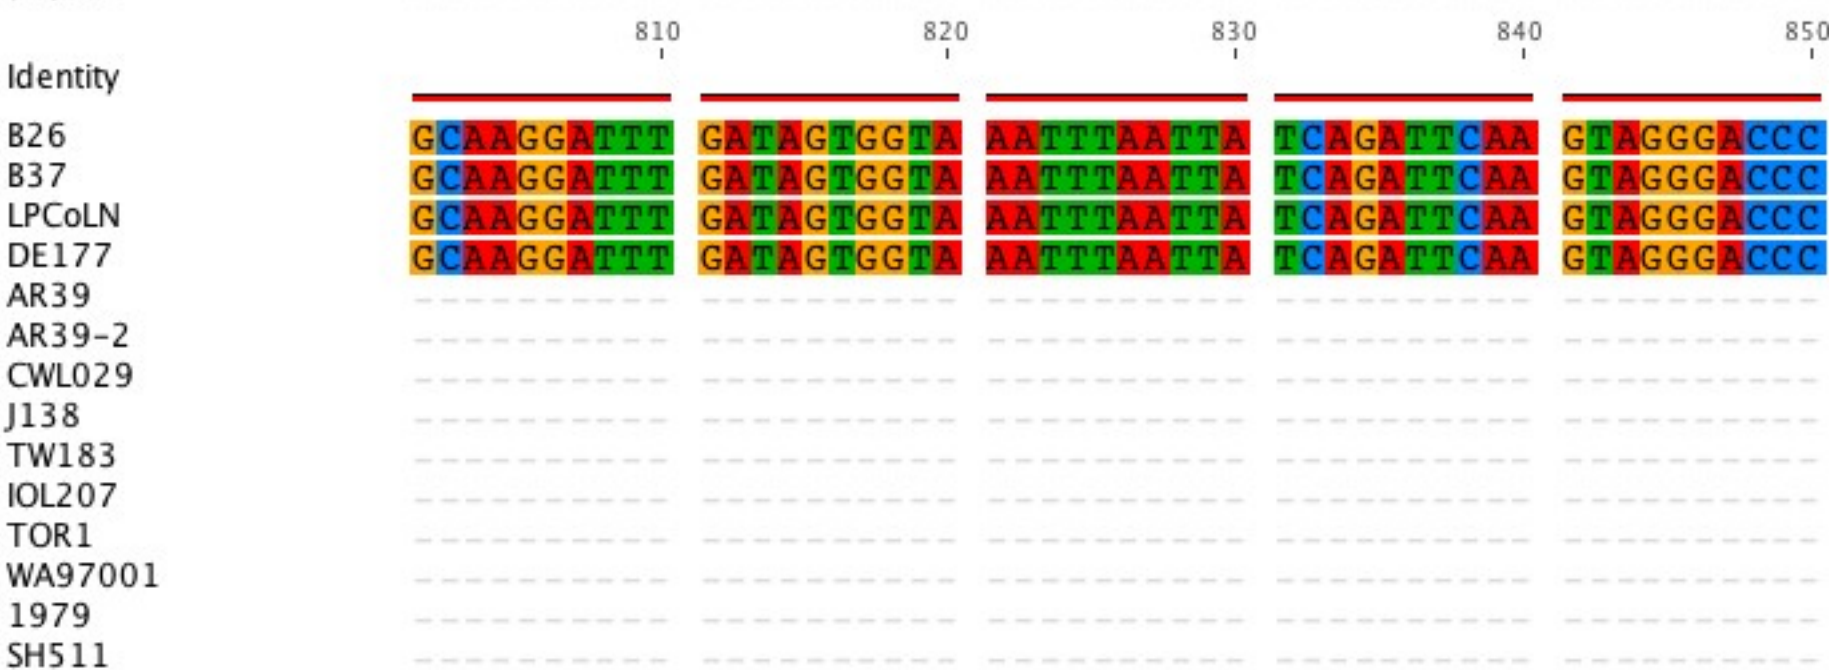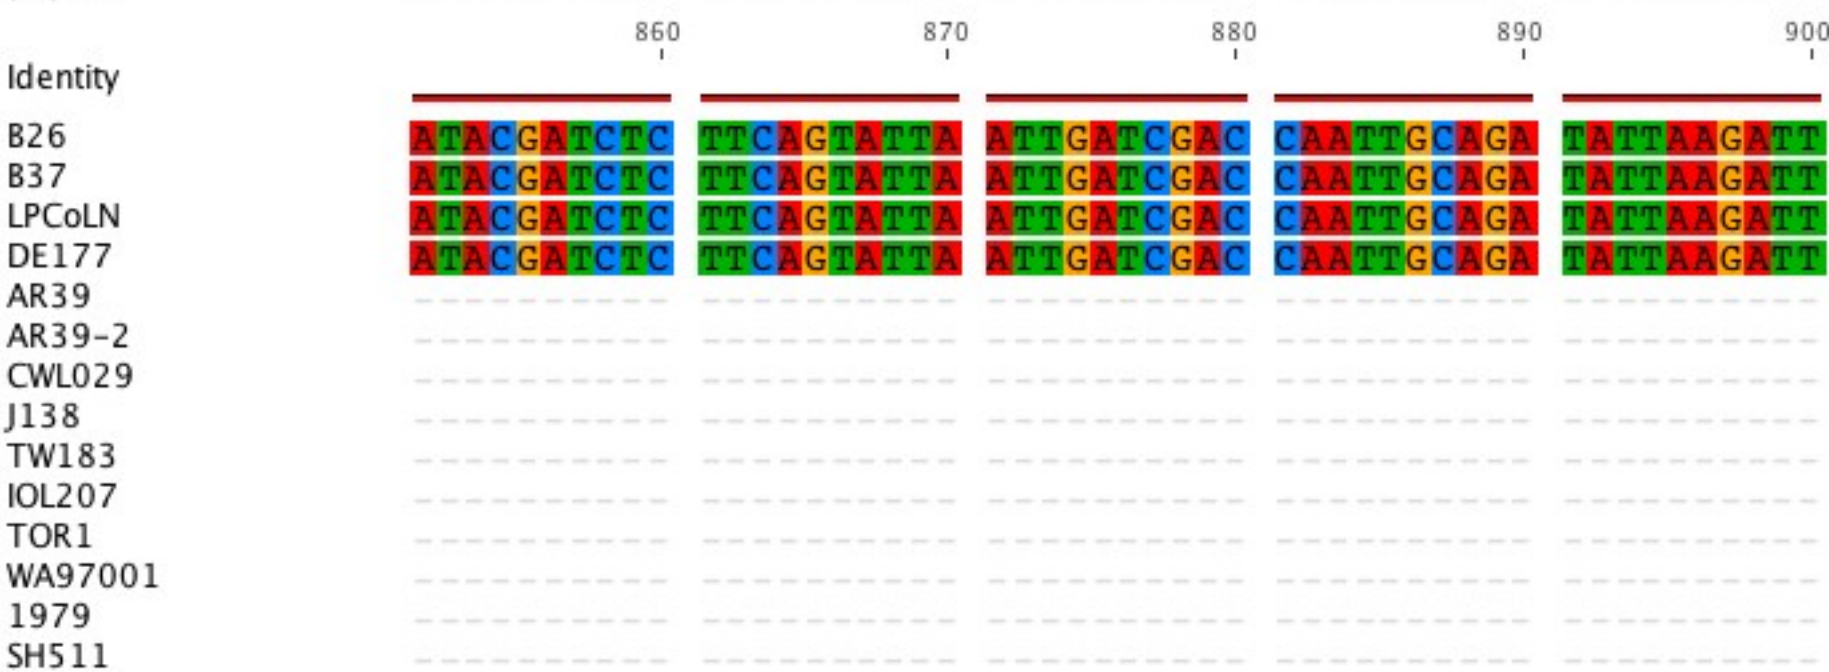

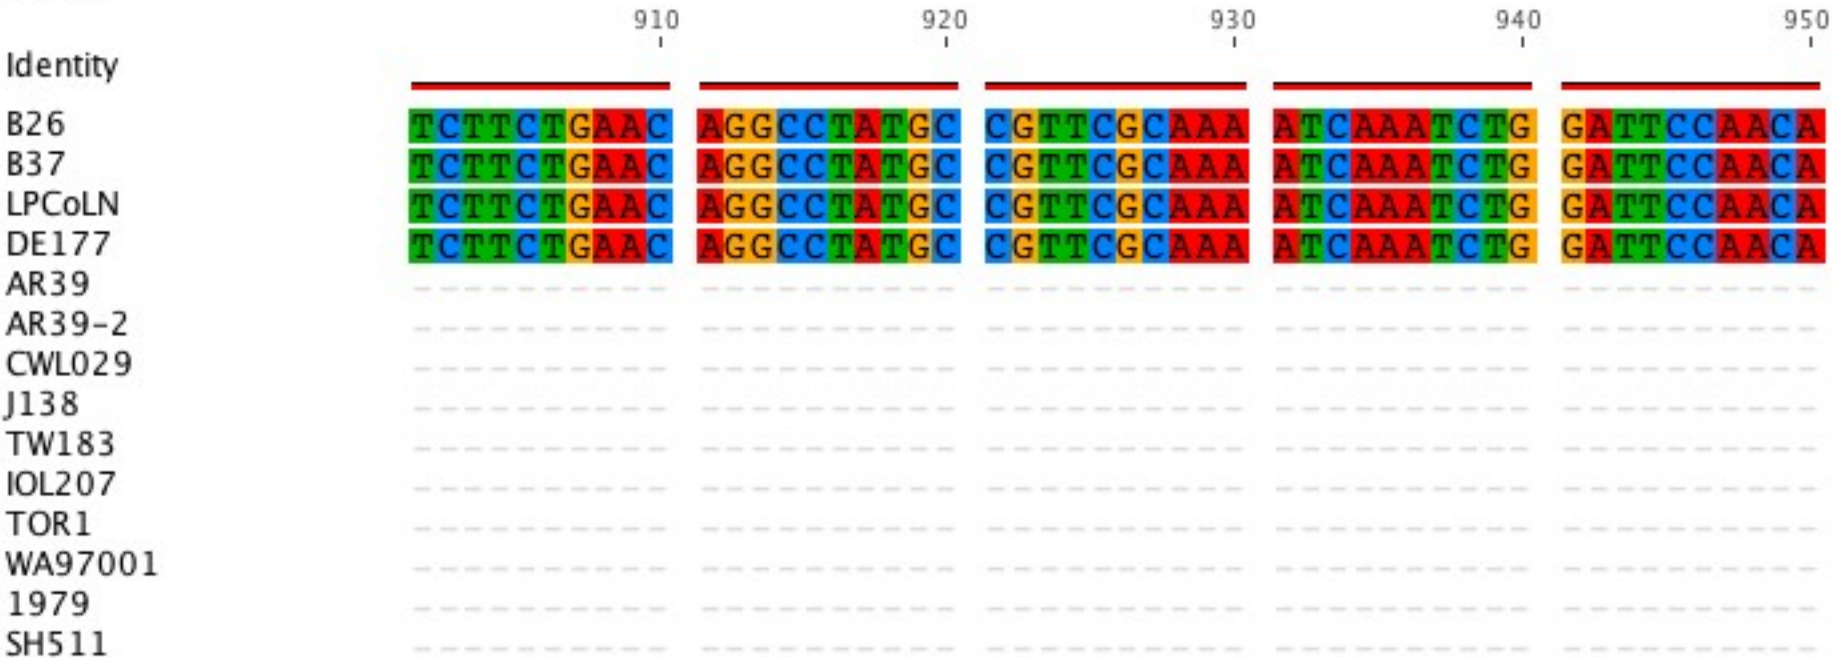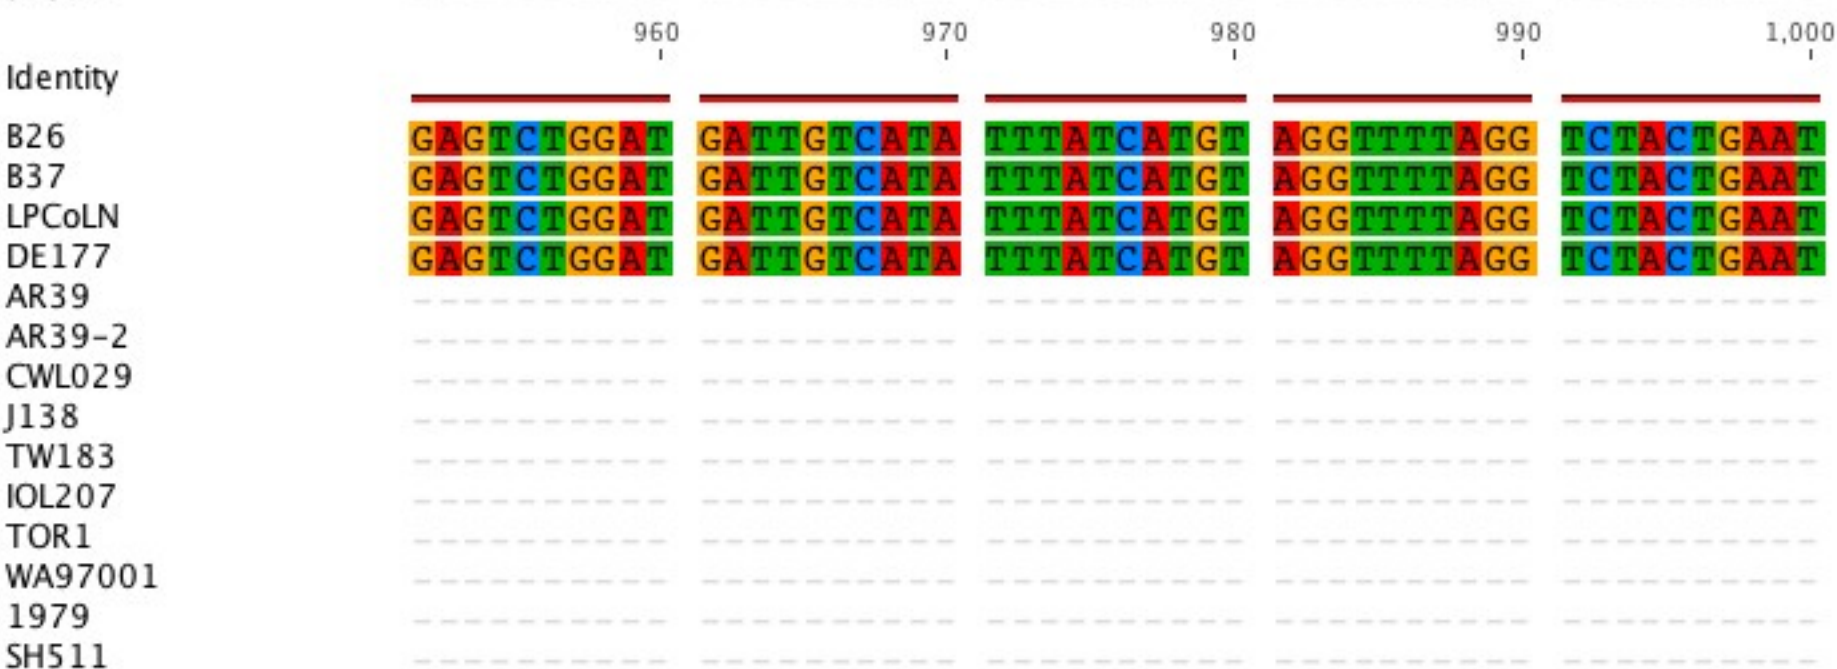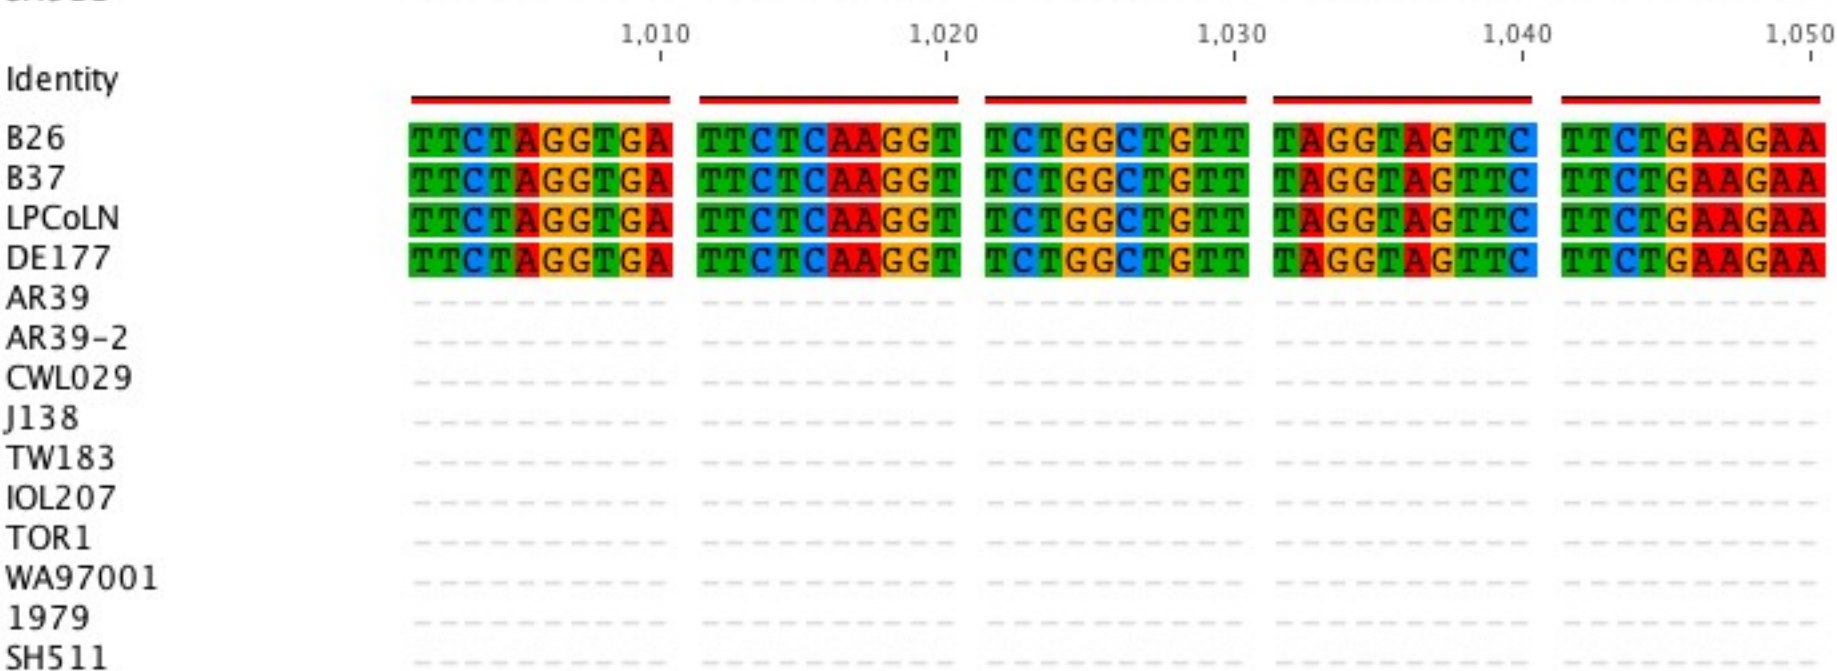

Identity 1,060 1,070 1,080 1,090 1,100

|         |    |          |            |            |            |            |            |
|---------|----|----------|------------|------------|------------|------------|------------|
| B26     | GA | TGATGATC | CTATGGATGA | ATCCGATGGA | GAAGAAGCTT | CAAAAGATTC |            |
| B37     | GA | TGATGATC | CTATGGATGA | ATCCGATGGA | GAAGAAGCTT | CAAAAGATTC |            |
| LPCoLN  | GA | TGATGATC | CTATGGATGA | ATCCGATGGA | GAAGAAGCTT | CAAAAGATTC |            |
| DE177   | GA | TGATGATC | CTATGGATGA | ATCCGATGGA | GAAGAAGCTT | CAAAAGATTC |            |
| AR39    | -- | --TGA--  | --ATGGATGA | ATC        | TGATGGA    | GAAGAAGCTT | CAAAAGATTC |
| AR39-2  | -- | TGATGATC | CTATGGATGA | ATC        | TGATGGA    | GAAGAAGCTT | CAAAAGATTC |
| CWL029  | -- | --TGA--  | --ATGGATGA | ATCCGATGGA | GAAGAAGCTT | CAAAAGATTC |            |
| J138    | -- | --TGA--  | --ATGGATGA | ATCCGATGGA | GAAGAAGCTT | CAAAAGATTC |            |
| TW183   | -- | --TGA--  | --ATGGATGA | ATC        | TGATGGA    | GAAGAAGCTT | CAAAAGATTC |
| IOL207  | -- | TGATGATC | CTATGGATGA | ATC        | TGATGGA    | GAAGAAGCTT | CAAAAGATTC |
| TOR1    | -- | TGATGATC | CTATGGATGA | ATCCGATGGA | GAAGAAGCTT | CAAAAGATTC |            |
| WA97001 | -- | TGATGATC | CTATGGATGA | ATCCGATGGA | GAAGAAGCTT | CAAAAGATTC |            |
| 1979    | -- | TGATGATC | CTATGGATGA | ATCCGATGGA | GAAGAAGCTT | CAAAAGATTC |            |
| SH511   | -- | TGATGATC | CTATGGATGA | ATCCGATGGA | GAAGAAGCTT | CAAAAGATTC |            |

Identity 1,110 1,120 1,130 1,140 1,150

|         |            |            |            |            |            |
|---------|------------|------------|------------|------------|------------|
| B26     | TGCATTTTCA | GCTAGTTTTT | CCTATGAGTT | TGTAAAATCA | AGTACTCGAG |
| B37     | TGCATTTTCA | GCTAGTTTTT | CCTATGAGTT | TGTAAAATCA | AGTACTCGAG |
| LPCoLN  | TGCATTTTCA | GCTAGTTTTT | CCTATGAGTT | TGTAAAATCA | AGTACTCGAG |
| DE177   | TGCATTTTCA | GCTAGTTTTT | CCTATGAGTT | TGTAAAATCA | AGTACTCGAG |
| AR39    | TGCATTTTCA | GCTAGTTTTT | CCTATGAGTT | TGTAAAATCA | AGTACTCGAG |
| AR39-2  | TGCATTTTCA | GCTAGTTTTT | CCTATGAGTT | TGTAAAATCA | AGTACTCGAG |
| CWL029  | TGCATTTTCA | GCTAGTTTTT | CCTATGAGTT | TGTAAAATCA | AGTACTCGAG |
| J138    | TGCATTTTCA | GCTAGTTTTT | CCTATGAGTT | TGTAAAATCA | AGTACTCGAG |
| TW183   | TGCATTTTCA | GCTAGTTTTT | CCTATGAGTT | TGTAAAATCA | AGTACTCGAG |
| IOL207  | TGCATTTTCA | GCTAGTTTTT | CCTATGAGTT | TGTAAAATCA | AGTACTCGAG |
| TOR1    | TGCATTTTCA | GCTAGTTTTT | CCTATGAGTT | TGTAAAATCA | AGTACTCGAG |
| WA97001 | TGCATTTTCA | GCTAGTTTTT | CCTATGAGTT | TGTAAAATCA | AGTACTCGAG |
| 1979    | TGCATTTTCA | GCTAGTTTTT | CCTATGAGTT | TGTAAAATCA | AGTACTCGAG |
| SH511   | TGCATTTTCA | GCTAGTTTTT | CCTATGAGTT | TGTAAAATCA | AGTACTCGAG |

Identity 1,160 1,170 1,180 1,190 1,200

|         |            |            |            |            |            |
|---------|------------|------------|------------|------------|------------|
| B26     | AATCTAAAAA | TACAGTCACA | CACTCAACAG | CGTCTCGTAC | ATTATATATT |
| B37     | AATCTAAAAA | TACAGTCACA | CACTCAACAG | CGTCTCGTAC | ATTATATATT |
| LPCoLN  | AATCTAAAAA | TACAGTCACA | CACTCAACAG | CGTCTCGTAC | ATTATATATT |
| DE177   | AATCTAAAAA | TACAGTCACA | CACTCAACAG | CGTCTCGTAC | ATTATATATT |
| AR39    | AATCTAAAAA | TACAGTCACA | CACTCAACAG | CGTCTCGTAC | ATTATATATT |
| AR39-2  | AATCTAAAAA | TACAGTCACA | CACTCAACAG | CGTCTCGTAC | ATTATATATT |
| CWL029  | AATCTAAAAA | TACAGTCACA | CACTCAACAG | CGTCTCGTAC | ATTATATATT |
| J138    | AATCTAAAAA | TACAGTCACA | CACTCAACAG | CGTCTCGTAC | ATTATATATT |
| TW183   | AATCTAAAAA | TACAGTCACA | CACTCAACAG | CGTCTCGTAC | ATTATATATT |
| IOL207  | AATCTAAAAA | TACAGTCACA | CACTCAACAG | CGTCTCGTAC | ATTATATATT |
| TOR1    | AATCTAAAAA | TACAGTCACA | CACTCAACAG | CGTCTCGTAC | ATTATATATT |
| WA97001 | AATCTAAAAA | TACAGTCACA | CACTCAACAG | CGTCTCGTAC | ATTATATATT |
| 1979    | AATCTAAAAA | TACAGTCACA | CACTCAACAG | CGTCTCGTAC | ATTATATATT |
| SH511   | AATCTAAAAA | TACAGTCACA | CACTCAACAG | CGTCTCGTAC | ATTATATATT |



|          | 1,210      | 1,220      | 1,230      | 1,240      | 1,250      |
|----------|------------|------------|------------|------------|------------|
| Identity |            |            |            |            |            |
| B26      | TTAAGGCAGG | ATTGTTCTTA | TGATCCAAGA | GCTCTCAAAG | TAGATGATGA |
| B37      | TTAAGGCAGG | ATTGTTCTTA | TGATCCAAGA | GCTCTCAAAG | TAGATGATGA |
| LPCoLN   | TTAAGGCAGG | ATTGTTCTTA | TGATCCAAGA | GCTCTCAAAG | TAGATGATGA |
| DE177    | TTAAGGCAGG | ATTGTTCTTA | TGATCCAAGA | GCTCTCAAAG | TAGATGATGA |
| AR39     | TTAAGGCAGG | ATTGTTCTTA | TGATCCAAGA | GCTCTCAAAG | TAGATGATGA |
| AR39-2   | TTAAGGCAGG | ATTGTTCTTA | TGATCCAAGA | GCTCTCAAAG | TAGATGATGA |
| CWL029   | TTAAGGCAGG | ATTGTTCTTA | TGATCCAAGA | GCTCTCAAAG | TAGATGATGA |
| J138     | TTAAGGCAGG | ATTGTTCTTA | TGATCCAAGA | GCTCTCAAAG | TAGATGATGA |
| TW183    | TTAAGGCAGG | ATTGTTCTTA | TGATCCAAGA | GCTCTCAAAG | TAGATGATGA |
| IOL207   | TTAAGGCAGG | ATTGTTCTTA | TGATCCAAGA | GCTCTCAAAG | TAGATGATGA |
| TOR1     | TTAAGGCAGG | ATTGTTCTTA | TGATCCAAGA | GCTCTCAAAG | TAGATGATGA |
| WA97001  | TTAAGGCAGG | ATTGTTCTTA | TGATCCAAGA | GCTCTCAAAG | TAGATGATGA |
| 1979     | TTAAGGCAGG | ATTGTTCTTA | TGATCCAAGA | GCTCTCAAAG | TAGATGATGA |
| SH511    | TTAAGGCAGG | ATTGTTCTTA | TGATCCAAGA | GCTCTCAAAG | TAGATGATGA |

|          | 1,260       | 1,270      | 1,280      | 1,290      | 1,300      |
|----------|-------------|------------|------------|------------|------------|
| Identity |             |            |            |            |            |
| B26      | ATTTTCGTTAT | TGGGTAGAAA | AAAGGTTGGA | CGCCAAGAAT | CCAGATTCAT |
| B37      | ATTTTCGTTAT | TGGGTAGAAA | AAAGGTTGGA | CGCCAAGAAT | CCAGATTCAT |
| LPCoLN   | ATTTTCGTTAT | TGGGTAGAAA | AAAGGTTGGA | CGCCAAGAAT | CCAGATTCAT |
| DE177    | ATTTTCGTTAT | TGGGTAGAAA | AAAGGTTGGA | CGCCAAGAAT | CCAGATTCAT |
| AR39     | ATTTTCGTTAT | TGGGTAGAAA | AAAGGTTGGA | CGCCAAGAAT | CCAGATTCAT |
| AR39-2   | ATTTTCGTTAT | TGGGTAGAAA | AAAGGTTGGA | CGCCAAGAAT | CCAGATTCAT |
| CWL029   | ATTTTCGTTAT | TGGGTAGAAA | AAAGGTTGGA | CGCCAAGAAT | CCAGATTCAT |
| J138     | ATTTTCGTTAT | TGGGTAGAAA | AAAGGTTGGA | CGCCAAGAAT | CCAGATTCAT |
| TW183    | ATTTTCGTTAT | TGGGTAGAAA | AAAGGTTGGA | CGCCAAGAAT | CCAGATTCAT |
| IOL207   | ATTTTCGTTAT | TGGGTAGAAA | AAAGGTTGGA | CGCCAAGAAT | CCAGATTCAT |
| TOR1     | ATTTTCGTTAT | TGGGTAGAAA | AAAGGTTGGA | CGCCAAGAAT | CCAGATTCAT |
| WA97001  | ATTTTCGTTAT | TGGGTAGAAA | AAAGGTTGGA | CGCCAAGAAT | CCAGATTCAT |
| 1979     | ATTTTCGTTAT | TGGGTAGAAA | AAAGGTTGGA | CGCCAAGAAT | CCAGATTCAT |
| SH511    | ATTTTCGTTAT | TGGGTAGAAA | AAAGGTTGGA | CGCCAAGAAT | CCAGATTCAT |

|          | 1,310      | 1,320      | 1,330      | 1,340      | 1,350      |
|----------|------------|------------|------------|------------|------------|
| Identity |            |            |            |            |            |
| B26      | TAAATGCGTT | CGTTAAAGAG | GTAGGAACTC | ATTATGTCAC | GTCAGTGACT |
| B37      | TAAATGCGTT | CGTTAAAGAG | GTAGGAACTC | ATTATGTCAC | GTCAGTGACT |
| LPCoLN   | TAAATGCGTT | CGTTAAAGAG | GTAGGAACTC | ATTATGTCAC | GTCAGTGACT |
| DE177    | TAAATGCGTT | CGTTAAAGAG | GTAGGAACTC | ATTATGTCAC | GTCAGTGACT |
| AR39     | TAAATGCGTT | CGTTAAAGAG | GTAGGAACTC | ATTATGTCGC | GTCAGTGACT |
| AR39-2   | TAAATGCGTT | CGTTAAAGAG | GTAGGAACTC | ATTATGTCGC | GTCAGTGACT |
| CWL029   | TAAATGCGTT | CGTTAAAGAG | GTAGGAACTC | ATTATGTCGC | GTCAGTGACT |
| J138     | TAAATGCGTT | CGTTAAAGAG | GTAGGAACTC | ATTATGTCGC | GTCAGTGACT |
| TW183    | TAAATGCGTT | CGTTAAAGAG | GTAGGAACTC | ATTATGTCGC | GTCAGTGACT |
| IOL207   | TAAATGCGTT | CGTTAAAGAG | GTAGGAACTC | ATTATGTCGC | GTCAGTGACT |
| TOR1     | TAAATGCGTT | CGTTAAAGAG | GTAGGAACTC | ATTATGTCGC | GTCAGTGACT |
| WA97001  | TAAATGCGTT | CGTTAAAGAG | GTAGGAACTC | ATTATGTCGC | GTCAGTGACT |
| 1979     | TAAATGCGTT | CGTTAAAGAG | GTAGGAACTC | AT-----    | -----      |
| SH511    | TAAATGCGTT | CGTTAAAGAG | GTAGGAACTC | AT-----    | -----      |

|          | 1,360               | 1,370      | 1,380      | 1,390       | 1,400      |
|----------|---------------------|------------|------------|-------------|------------|
| Identity |                     |            |            |             |            |
| B26      | TA <b>T</b> GGTGGCA | TTGGTTTTCA | AGTGCTAAAG | ATGTC TTATC | TCCAAGTCGA |
| B37      | TA <b>T</b> GGTGGCA | TTGGTTTTCA | AGTGCTAAAG | ATGTC TTATC | TCCAAGTCGA |
| LPCoLN   | TA <b>T</b> GGTGGCA | TTGGTTTTCA | AGTGCTAAAG | ATGTC TTATC | TCCAAGTCGA |
| DE177    | TA <b>T</b> GGTGGCA | TTGGTTTTCA | AGTGCTAAAG | ATGTC TTATC | TCCAAGTCGA |
| AR39     | TACGGTGGCA          | TTGGTTTTCA | AGTGCTAAAG | ATGTC TTATC | TCCAAGTCGA |
| AR39-2   | TACGGTGGCA          | TTGGTTTTCA | AGTGCTAAAG | ATGTC TTATC | TCCAAGTCGA |
| CWL029   | TACGGTGGCA          | TTGGTTTTCA | AGTGCTAAAG | ATGTC TTATC | TCCAAGTCGA |
| J138     | TACGGTGGCA          | TTGGTTTTCA | AGTGCTAAAG | ATGTC TTATC | TCCAAGTCGA |
| TW183    | TACGGTGGCA          | TTGGTTTTCA | AGTGCTAAAG | ATGTC TTATC | TCCAAGTCGA |
| IOL207   | TACGGTGGCA          | TTGGTTTTCA | AGTGCTAAAG | ATGTC TTATC | TCCAAGTCGA |
| TOR1     | TACGGTGGCA          | TTGGTTTTCA | AGTGCTAAAG | ATGTC TTATC | TCCAAGTCGA |
| WA97001  | TACGGTGGCA          | TTGGTTTTCA | AGTGCTAAAG | ATGTC TTATC | TCCAAGTCGA |
| 1979     | -----               | -----      | -----      | -----       | -----      |
| SH511    | -----               | -----      | -----      | -----       | -----      |

|          | 1,410      | 1,420      | 1,430      | 1,440      | 1,450      |
|----------|------------|------------|------------|------------|------------|
| Identity |            |            |            |            |            |
| B26      | GGAGTTAGAG | AAAGAAAAAA | TCTCGATATC | TGTAGCTGCA | GCAAGTTCTT |
| B37      | GGAGTTAGAG | AAAGAAAAAA | TCTCGATATC | TGTAGCTGCA | GCAAGTTCTT |
| LPCoLN   | GGAGTTAGAG | AAAGAAAAAA | TCTCGATATC | TGTAGCTGCA | GCAAGTTCTT |
| DE177    | GGAGTTAGAG | AAAGAAAAAA | TCTCGATATC | TGTAGCTGCA | GCAAGTTCTT |
| AR39     | GGAGTTAGAG | AAAGAAAAAA | TCTCGATATC | TGTAGCTGCA | GCAAGTTCTT |
| AR39-2   | GGAGTTAGAG | AAAGAAAAAA | TCTCGATATC | TGTAGCTGCA | GCAAGTTCTT |
| CWL029   | GGAGTTAGAG | AAAGAAAAAA | TCTCGATATC | TGTAGCTGCA | GCAAGTTCTT |
| J138     | GGAGTTAGAG | AAAGAAAAAA | TCTCGATATC | TGTAGCTGCA | GCAAGTTCTT |
| TW183    | GGAGTTAGAG | AAAGAAAAAA | TCTCGATATC | TGTAGCTGCA | GCAAGTTCTT |
| IOL207   | GGAGTTAGAG | AAAGAAAAAA | TCTCGATATC | TGTAGCTGCA | GCAAGTTCTT |
| TOR1     | GGAGTTAGAG | AAAGAAAAAA | TCTCGATATC | TGTAGCTGCA | GCAAGTTCTT |
| WA97001  | GGAGTTAGAG | AAAGAAAAAA | TCTCGATATC | TGTAGCTGCA | GCAAGTTCTT |
| 1979     | -----      | -----      | -----      | -----      | -----      |
| SH511    | -----      | -----      | -----      | -----      | -----      |

|          | 1,460        | 1,470      | 1,480      | 1,490      | 1,500      |
|----------|--------------|------------|------------|------------|------------|
| Identity |              |            |            |            |            |
| B26      | TATTA AAAAAG | TAAAACATCG | AACGCGACAG | AGAAAGGTTA | TTCTTCGTAT |
| B37      | TATTA AAAAAG | TAAAACATCG | AACGCGACAG | AGAAAGGTTA | TTCTTCGTAT |
| LPCoLN   | TATTA AAAAAG | TAAAACATCG | AACGCGACAG | AGAAAGGTTA | TTCTTCGTAT |
| DE177    | TATTA AAAAAG | TAAAACATCG | AACGCGACAG | AGAAAGGTTA | TTCTTCGTAT |
| AR39     | TATTA AAAAAG | TAAAACATCG | AACGCGACAG | AGAAAGGTTA | TTCTTCGTAT |
| AR39-2   | TATTA AAAAAG | TAAAACATCG | AACGCGACAG | AGAAAGGTTA | TTCTTCGTAT |
| CWL029   | TATTA AAAAAG | TAAAACATCG | AACGCGACAG | AGAAAGGTTA | TTCTTCGTAT |
| J138     | TATTA AAAAAG | TAAAACATCG | AACGCGACAG | AGAAAGGTTA | TTCTTCGTAT |
| TW183    | TATTA AAAAAG | TAAAACATCG | AACGCGACAG | AGAAAGGTTA | TTCTTCGTAT |
| IOL207   | TATTA AAAAAG | TAAAACATCG | AACGCGACAG | AGAAAGGTTA | TTCTTCGTAT |
| TOR1     | TATTA AAAAAG | TAAAACATCG | AACGCGACAG | AGAAAGGTTA | TTCTTCGTAT |
| WA97001  | TATTA AAAAAG | TAAAACATCG | AACGCGACAG | AGAAAGGTTA | TTCTTCGTAT |
| 1979     | -----        | -----      | -----      | -----      | -----      |
| SH511    | -----        | -----      | -----      | -----      | -----      |

| Identity | 1,510      | 1,520      | 1,530      | 1,540      | 1,550      |
|----------|------------|------------|------------|------------|------------|
| B26      | CAGTCGGAAT | CATCAGCTCA | AACAGTATTT | CTTGGTGGAA | CAGTATTACC |
| B37      | CAGTCGGAAT | CATCAGCTCA | AACAGTATTT | CTTGGTGGAA | CAGTATTACC |
| LPCoLN   | CAGTCGGAAT | CATCAGCTCA | AACAGTATTT | CTTGGTGGAA | CAGTATTACC |
| DE177    | CAGTCGGAAT | CATCAGCTCA | AACAGTATTT | CTTGGTGGAA | CAGTATTACC |
| AR39     | CAGTCGGAAT | CATCAGCTCA | AACAGTATTT | CTTGGTGGAA | CAGTATTACC |
| AR39-2   | CAGTCGGAAT | CATCAGCTCA | AACAGTATTT | CTTGGTGGAA | CAGTATTACC |
| CWL029   | CAGTCGGAAT | CATCAGCTCA | AACAGTATTT | CTTGGTGGAA | CAGTATTACC |
| J138     | CAGTCGGAAT | CATCAGCTCA | AACAGTATTT | CTTGGTGGAA | CAGTATTACC |
| TW183    | CAGTCGGAAT | CATCAGCTCA | AACAGTATTT | CTTGGTGGAA | CAGTATTACC |
| IOL207   | CAGTCGGAAT | CATCAGCTCA | AACAGTATTT | CTTGGTGGAA | CAGTATTACC |
| TOR1     | CAGTCGGAAT | CATCAGCTCA | AACAGTATTT | CTTGGTGGAA | CAGTATTACC |
| WA97001  | CAGTCGGAAT | CATCAGCTCA | AACAGTATTT | CTTGGTGGAA | CAGTATTACC |
| 1979     | -----      | -----      | -----      | -----      | -----      |
| SH511    | -----      | -----      | -----      | -----      | -----      |

| Identity | 1,560      | 1,570      | 1,580      | 1,590      | 1,600               |
|----------|------------|------------|------------|------------|---------------------|
| B26      | TGATCTCCAG | CAAGACAAGT | TGGATTTCAA | AGATTGGTCT | GAAAGC <b>G</b> TTC |
| B37      | TGATCTCCAG | CAAGACAAGT | TGGATTTCAA | AGATTGGTCT | GAAAGC <b>G</b> TTC |
| LPCoLN   | TGATCTCCAG | CAAGACAAGT | TGGATTTCAA | AGATTGGTCT | GAAAGC <b>G</b> TTC |
| DE177    | TGATCTCCAG | CAAGACAAGT | TGGATTTCAA | AGATTGGTCT | GAAAGC <b>G</b> TTC |
| AR39     | TGATCTCCAG | CAAGACAAGT | TGGATTTCAA | AGATTGGTCT | GAAAGCATTTC         |
| AR39-2   | TGATCTCCAG | CAAGACAAGT | TGGATTTCAA | AGATTGGTCT | GAAAGCATTTC         |
| CWL029   | TGATCTCCAG | CAAGACAAGT | TGGATTTCAA | AGATTGGTCT | GAAAGCATTTC         |
| J138     | TGATCTCCAG | CAAGACAAGT | TGGATTTCAA | AGATTGGTCT | GAAAGCATTTC         |
| TW183    | TGATCTCCAG | CAAGACAAGT | TGGATTTCAA | AGATTGGTCT | GAAAGCATTTC         |
| IOL207   | TGATCTCCAG | CAAGACAAGT | TGGATTTCAA | AGATTGGTCT | GAAAGCATTTC         |
| TOR1     | TGATCTCCAG | CAAGACAAGT | TGGATTTCAA | AGATTGGTCT | GAAAGCATTTC         |
| WA97001  | TGATCTCCAG | CAAGACAAGT | TGGATTTCAA | AGATTGGTCT | GAAAGCATTTC         |
| 1979     | -----      | -----      | -----      | -----      | -----               |
| SH511    | -----      | -----      | -----      | -----      | -----               |

| Identity | 1,610      | 1,620      | 1,630      | 1,640      | 1,650      |
|----------|------------|------------|------------|------------|------------|
| B26      | CTAATGAGCC | CATTCCTCTA | GCTATTAGTG | TATCTTCAAT | TACAGATCTC |
| B37      | CTAATGAGCC | CATTCCTCTA | GCTATTAGTG | TATCTTCAAT | TACAGATCTC |
| LPCoLN   | CTAATGAGCC | CATTCCTCTA | GCTATTAGTG | TATCTTCAAT | TACAGATCTC |
| DE177    | CTAATGAGCC | CATTCCTCTA | GCTATTAGTG | TATCTTCAAT | TACAGATCTC |
| AR39     | CTAATGAGCC | CATTCCTCTA | GCTATTAGTG | TATCTTCAAT | TACAGATCTC |
| AR39-2   | CTAATGAGCC | CATTCCTCTA | GCTATTAGTG | TATCTTCAAT | TACAGATCTC |
| CWL029   | CTAATGAGCC | CATTCCTCTA | GCTATTAGTG | TATCTTCAAT | TACAGATCTC |
| J138     | CTAATGAGCC | CATTCCTCTA | GCTATTAGTG | TATCTTCAAT | TACAGATCTC |
| TW183    | CTAATGAGCC | CATTCCTCTA | GCTATTAGTG | TATCTTCAAT | TACAGATCTC |
| IOL207   | CTAATGAGCC | CATTCCTCTA | GCTATTAGTG | TATCTTCAAT | TACAGATCTC |
| TOR1     | CTAATGAGCC | CATTCCTCTA | GCTATTAGTG | TATCTTCAAT | TACAGATCTC |
| WA97001  | CTAATGAGCC | CATTCCTCTA | GCTATTAGTG | TATCTTCAAT | TACAGATCTC |
| 1979     | --AATGAGCC | CATTCCTCTA | GCTATTAGTG | TATCTTCAAT | TACAGATCTC |
| SH511    | --AATGAGCC | CATTCCTCTA | GCTATTAGTG | TATCTTCAAT | TACAGATCTC |

| Identity | 1,660      | 1,670      | 1,680      | 1,690      | 1,700      |
|----------|------------|------------|------------|------------|------------|
| B26      | ATAATTCCAG | AACTTTTCCC | TTCTGAAGAT | GCTCAAGTCT | TATCCCAGAA |
| B37      | ATAATTCCAG | AACTTTTCCC | TTCTGAAGAT | GCTCAAGTCT | TATCCCAGAA |
| LPCoLN   | ATAATTCCAG | AACTTTTCCC | TTCTGAAGAT | GCTCAAGTCT | TATCCCAGAA |
| DE177    | ATAATTCCAG | AACTTTTCCC | TTCTGAAGAT | GCTCAAGTCT | TATCCCAGAA |
| AR39     | ATAATTCCAG | AACTTTTCCC | TTCTGAAGAT | GCTCAAGTCT | TATCCCAGAA |
| AR39-2   | ATAATTCCAG | AACTTTTCCC | TTCTGAAGAT | GCTCAAGTCT | TATCCCAGAA |
| CWL029   | ATAATTCCAG | AACTTTTCCC | TTCTGAAGAT | GCTCAAGTCT | TATCCCAGAA |
| J138     | ATAATTCCAG | AACTTTTCCC | TTCTGAAGAT | GCTCAAGTCT | TATCCCAGAA |
| TW183    | ATAATTCCAG | AACTTTTCCC | TTCTGAAGAT | GCTCAAGTCT | TATCCCAGAA |
| IOL207   | ATAATTCCAG | AACTTTTCCC | TTCTGAAGAT | GCTCAAGTCT | TATCCCAGAA |
| TOR1     | ATAATTCCAG | AACTTTTCCC | TTCTGAAGAT | GCTCAAGTCT | TATCCCAGAA |
| WA97001  | ATAATTCCAG | AACTTTTCCC | TTCTGAAGAT | GCTCAAGTCT | TATCCCAGAA |
| 1979     | ATAATTCCAG | AACTTTTCCC | TTCTGAAGAT | GCTCAAGTCT | TATCCCAGAA |
| SH511    | ATAATTCCAG | AACTTTTCCC | TTCTGAAGAT | GCTCAAGTCT | TATCCCAGAA |

| Identity | 1,710      | 1,720      | 1,730      | 1,740      | 1,750      |
|----------|------------|------------|------------|------------|------------|
| B26      | GAAATCAGCT | CTAGGAAAG  | TTATTCCTAA | TTATCTAGAG | AGTCACAAGC |
| B37      | GAAATCAGCT | CTAGGAAAG  | TTATTCCTAA | TTATCTAGAG | AGTCACAAGC |
| LPCoLN   | GAAATCAGCT | CTAGGAAAG  | TTATTCCTAA | TTATCTAGAG | AGTCACAAGC |
| DE177    | GAAATCAGCT | CTAGGAAAG  | TTATTCCTAA | TTATCTAGAG | AGTCACAAGC |
| AR39     | GAAATCAGCT | CTAGGACAAG | TTATTCCTAA | TTATCTAGAG | AGTCACAAGC |
| AR39-2   | GAAATCAGCT | CTAGGACAAG | TTATTCCTAA | TTATCTAGAG | AGTCACAAGC |
| CWL029   | GAAATCAGCT | CTAGGACAAG | TTATTCCTAA | TTATCTAGAG | AGTCACAAGC |
| J138     | GAAATCAGCT | CTAGGACAAG | TTATTCCTAA | TTATCTAGAG | AGTCACAAGC |
| TW183    | GAAATCAGCT | CTAGGACAAG | TTATTCCTAA | TTATCTAGAG | AGTCACAAGC |
| IOL207   | GAAATCAGCT | CTAGGACAAG | TTATTCCTAA | TTATCTAGAG | AGTCACAAGC |
| TOR1     | GAAATCAGCT | CTAGGACAAG | TTATTCCTAA | TTATCTAGAG | AGTCACAAGC |
| WA97001  | GAAATCAGCT | CTAGGACAAG | TTATTCCTAA | TTATCTAGAG | AGTCACAAGC |
| 1979     | GAAATCAGCT | CTAGGACAAG | TTATTCCTAA | TTATCTAGAG | AGTCACAAGC |
| SH511    | GAAATCAGCT | CTAGGACAAG | TTATTCCTAA | TTATCTAGAG | AGTCACAAGC |

| Identity | 1,760      | 1,770      | 1,780      | 1,790      | 1,800      |
|----------|------------|------------|------------|------------|------------|
| B26      | CTAAAGAAGA | AGGCCCAAAA | CCAGTCCAGA | TTACTTCTGG | ATTCAATTCA |
| B37      | CTAAAGAAGA | AGGCCCAAAA | CCAGTCCAGA | TTACTTCTGG | ATTCAATTCA |
| LPCoLN   | CTAAAGAAGA | AGGCCCAAAA | CCAGTCCAGA | TTACTTCTGG | ATTCAATTCA |
| DE177    | CTAAAGAAGA | AGGCCCAAAA | CCAGTCCAAA | TTACTTCTGG | ATTCAATTCA |
| AR39     | CTAAAGAAGA | AGGCCCAAAA | CCAGTCCAAA | TTACTTCTGG | ATTCAATTCA |
| AR39-2   | CTAAAGAAGA | AGGCCCAAAA | CCAGTCCAAA | TTACTTCTGG | ATTCAATTCA |
| CWL029   | CTAAAGAAGA | AGGCCCAAAA | CCAGTCCAAA | TTACTTCTGG | ATTCAATTCA |
| J138     | CTAAAGAAGA | AGGCCCAAAA | CCAGTCCAAA | TTACTTCTGG | ATTCAATTCA |
| TW183    | CTAAAGAAGA | AGGCCCAAAA | CCAGTCCAAA | TTACTTCTGG | ATTCAATTCA |
| IOL207   | CTAAAGAAGA | AGGCCCAAAA | CCAGTCCAAA | TTACTTCTGG | ATTCAATTCA |
| TOR1     | CTAAAGAAGA | AGGCCCAAAA | CCAGTCCAAA | TTACTTCTGG | ATTCAATTCA |
| WA97001  | CTAAAGAAGA | AGGCCCAAAA | CCAGTCCAAA | TTACTTCTGG | ATTCAATTCA |
| 1979     | CTAAAGAAGA | AGGCCCAAAA | CCAGTCCAAA | TTACTTCTGG | ATTCAATTCA |
| SH511    | CTAAAGAAGA | AGGCCCAAAA | CCAGTCCAAA | TTACTTCTGG | ATTCAATTCA |

1,810 1,820 1,830 1,840 1,850

Identity 

B26 TCGTCTTCAG TATTTACGCT TCAAGCAGCA AAAGCTCCTA AGACAGTGTC

B37 TCGTCTTCAG TATTTACGCT TCAAGCAGCA AAAGCTCCTA AGACAGTGTC

LPCoLN TCGTCTTCAG TATTTACGCT TCAAGCAGCA AAAGCTCCTA AGACAGTGTC

DE177 TCGTCTTCAG TATTTACGCT TCAAGCAGCA AAAGCTCCTA AGACAGTGTC

AR39 TCGTCTTCGG TATTTACGCT TCAAGCAGCA AAAGCTCCTA AGACTGTGTC

AR39-2 TCGTCTTCGG TATTTACGCT TCAAGCAGCA AAAGCTCCTA AGACTGTGTC

CWL029 TCGTCTTCGG TATTTACGCT TCAAGCAGCA AAAGCTCCTA AGACTGTGTC

J138 TCGTCTTCGG TATTTACGCT TCAAGCAGCA AAAGCTCCTA AGACTGTGTC

TW183 TCGTCTTCGG TATTTACGCT TCAAGCAGCA AAAGCTCCTA AGACTGTGTC

IOL207 TCGTCTTCGG TATTTACGCT TCAAGCAGCA AAAGCTCCTA AGACTGTGTC

TOR1 TCGTCTTCGG TATTTACGCT TCAAGCAGCA AAAGCTCCTA AGACTGTGTC

WA97001 TCGTCTTCGG TATTTACGCT TCAAGCAGCA AAAGCTCCTA AGACTGTGTC

1979 TCGTCTTCAG TATTTACGCT TCAAGCAGCA AAAGCTCCTA AGACAGTGTC

SH511 TCGTCTTCAG TATTTACGCT TCAAGCAGCA AAAGCTCCTA AGACAGTGTC

1,860 1,870 1,880 1,890 1,900

Identity 

B26 TTTCCCCTAT ATAGATTATT GGTCTACAAT TCCCTATCTT TTCCCCTACTC

B37 TTTCCCCTAT ATAGATTATT GGTCTACAAT TCCCTATCTT TTCCCCTACTC

LPCoLN TTTCCCCTAT ATAGATTATT GGTCTACAAT TCCCTATCTT TTCCCCTACTC

DE177 TTTCCCCTAT ATAGATTATT GGTCTACAAT TCCCTATCTT TTCCCCTACTC

AR39 TTTCCCCTAT ATAGATTATT GGTCTACAAT TCCCTATCTT TTCCCCTACTC

AR39-2 TTTCCCCTAT ATAGATTATT GGTCTACAAT TCCCTATCTT TTCCCCTACTC

CWL029 TTTCCCCTAT ATAGATTATT GGTCTACAAT TCCCTATCTT TTCCCCTACTC

J138 TTTCCCCTAT ATAGATTATT GGTCTACAAT TCCCTATCTT TTCCCCTACTC

TW183 TTTCCCCTAT ATAGATTATT GGTCTACAAT TCCCTATCTT TTCCCCTACTC

IOL207 TTTCCCCTAT ATAGATTATT GGTCTACAAT TCCCTATCTT TTCCCCTACTC

TOR1 TTTCCCCTAT ATAGATTATT GGTCTACAAT TCCCTATCTT TTCCCCTACTC

WA97001 TTTCCCCTAT ATAGATTATT GGTCTACAAT TCCCTATCTT TTCCCCTACTC

1979 TTTCCCCTAT ATAGATTATT GGTCTACAAT TCCCTATCTT TTCCCCTACTC

SH511 TTTCCCCTAT ATAGATTATT GGTCTACAAT TCCCTATCTT TTCCCCTACTC

1,910 1,920 1,930 1,939

Identity 

B26 TTAAAGAAAC TTCAGGTGCT CAACCTCTCT CGTTCTACT

B37 TTAAAGAAAC TTCAGGTGCT CAACCTCTCT CGTTCTACT

LPCoLN TTAAAGAAAC TTCAGGTGCT CAACCTCTCT CGTTCTACT

DE177 TTAAAGAAAC TTCAGGTGCT CAACCTCTCT CGTTCTACT

AR39 TTAAAGAAAC TTCAGGTGCT CAACCTCTCT CGTTCTACT

AR39-2 TTAAAGAAAC TTCAGGTGCT CAACCTCTCT CGTTCTACT

CWL029 TTAAAGAAAC TTCAGGTGCT CAACCTCTCT CGTTCTACT

J138 TTAAAGAAAC TTCAGGTGCT CAACCTCTCT CGTTCTACT

TW183 TTAAAGAAAC TTCAGGTGCT CAACCTCTCT CGTTCTACT

IOL207 TTAAAGAAAC TTCAGGTGCT CAACCTCTCT CGTTCTACT

TOR1 TTAAAGAAAC TTCAGGTGCT CAACCTCTCT CGTTCTACT

WA97001 TTAAAGAAAC TTCAGGTGCT CAACCTCTCT CGTTCTACT

1979 TTAAAGAAAC TTCAGGTGCT CAACCTCTCT CGTTCTACT

SH511 TTAAAGAAAC TTCAGGTGCT CAACCTCTCT CGTTCTACT

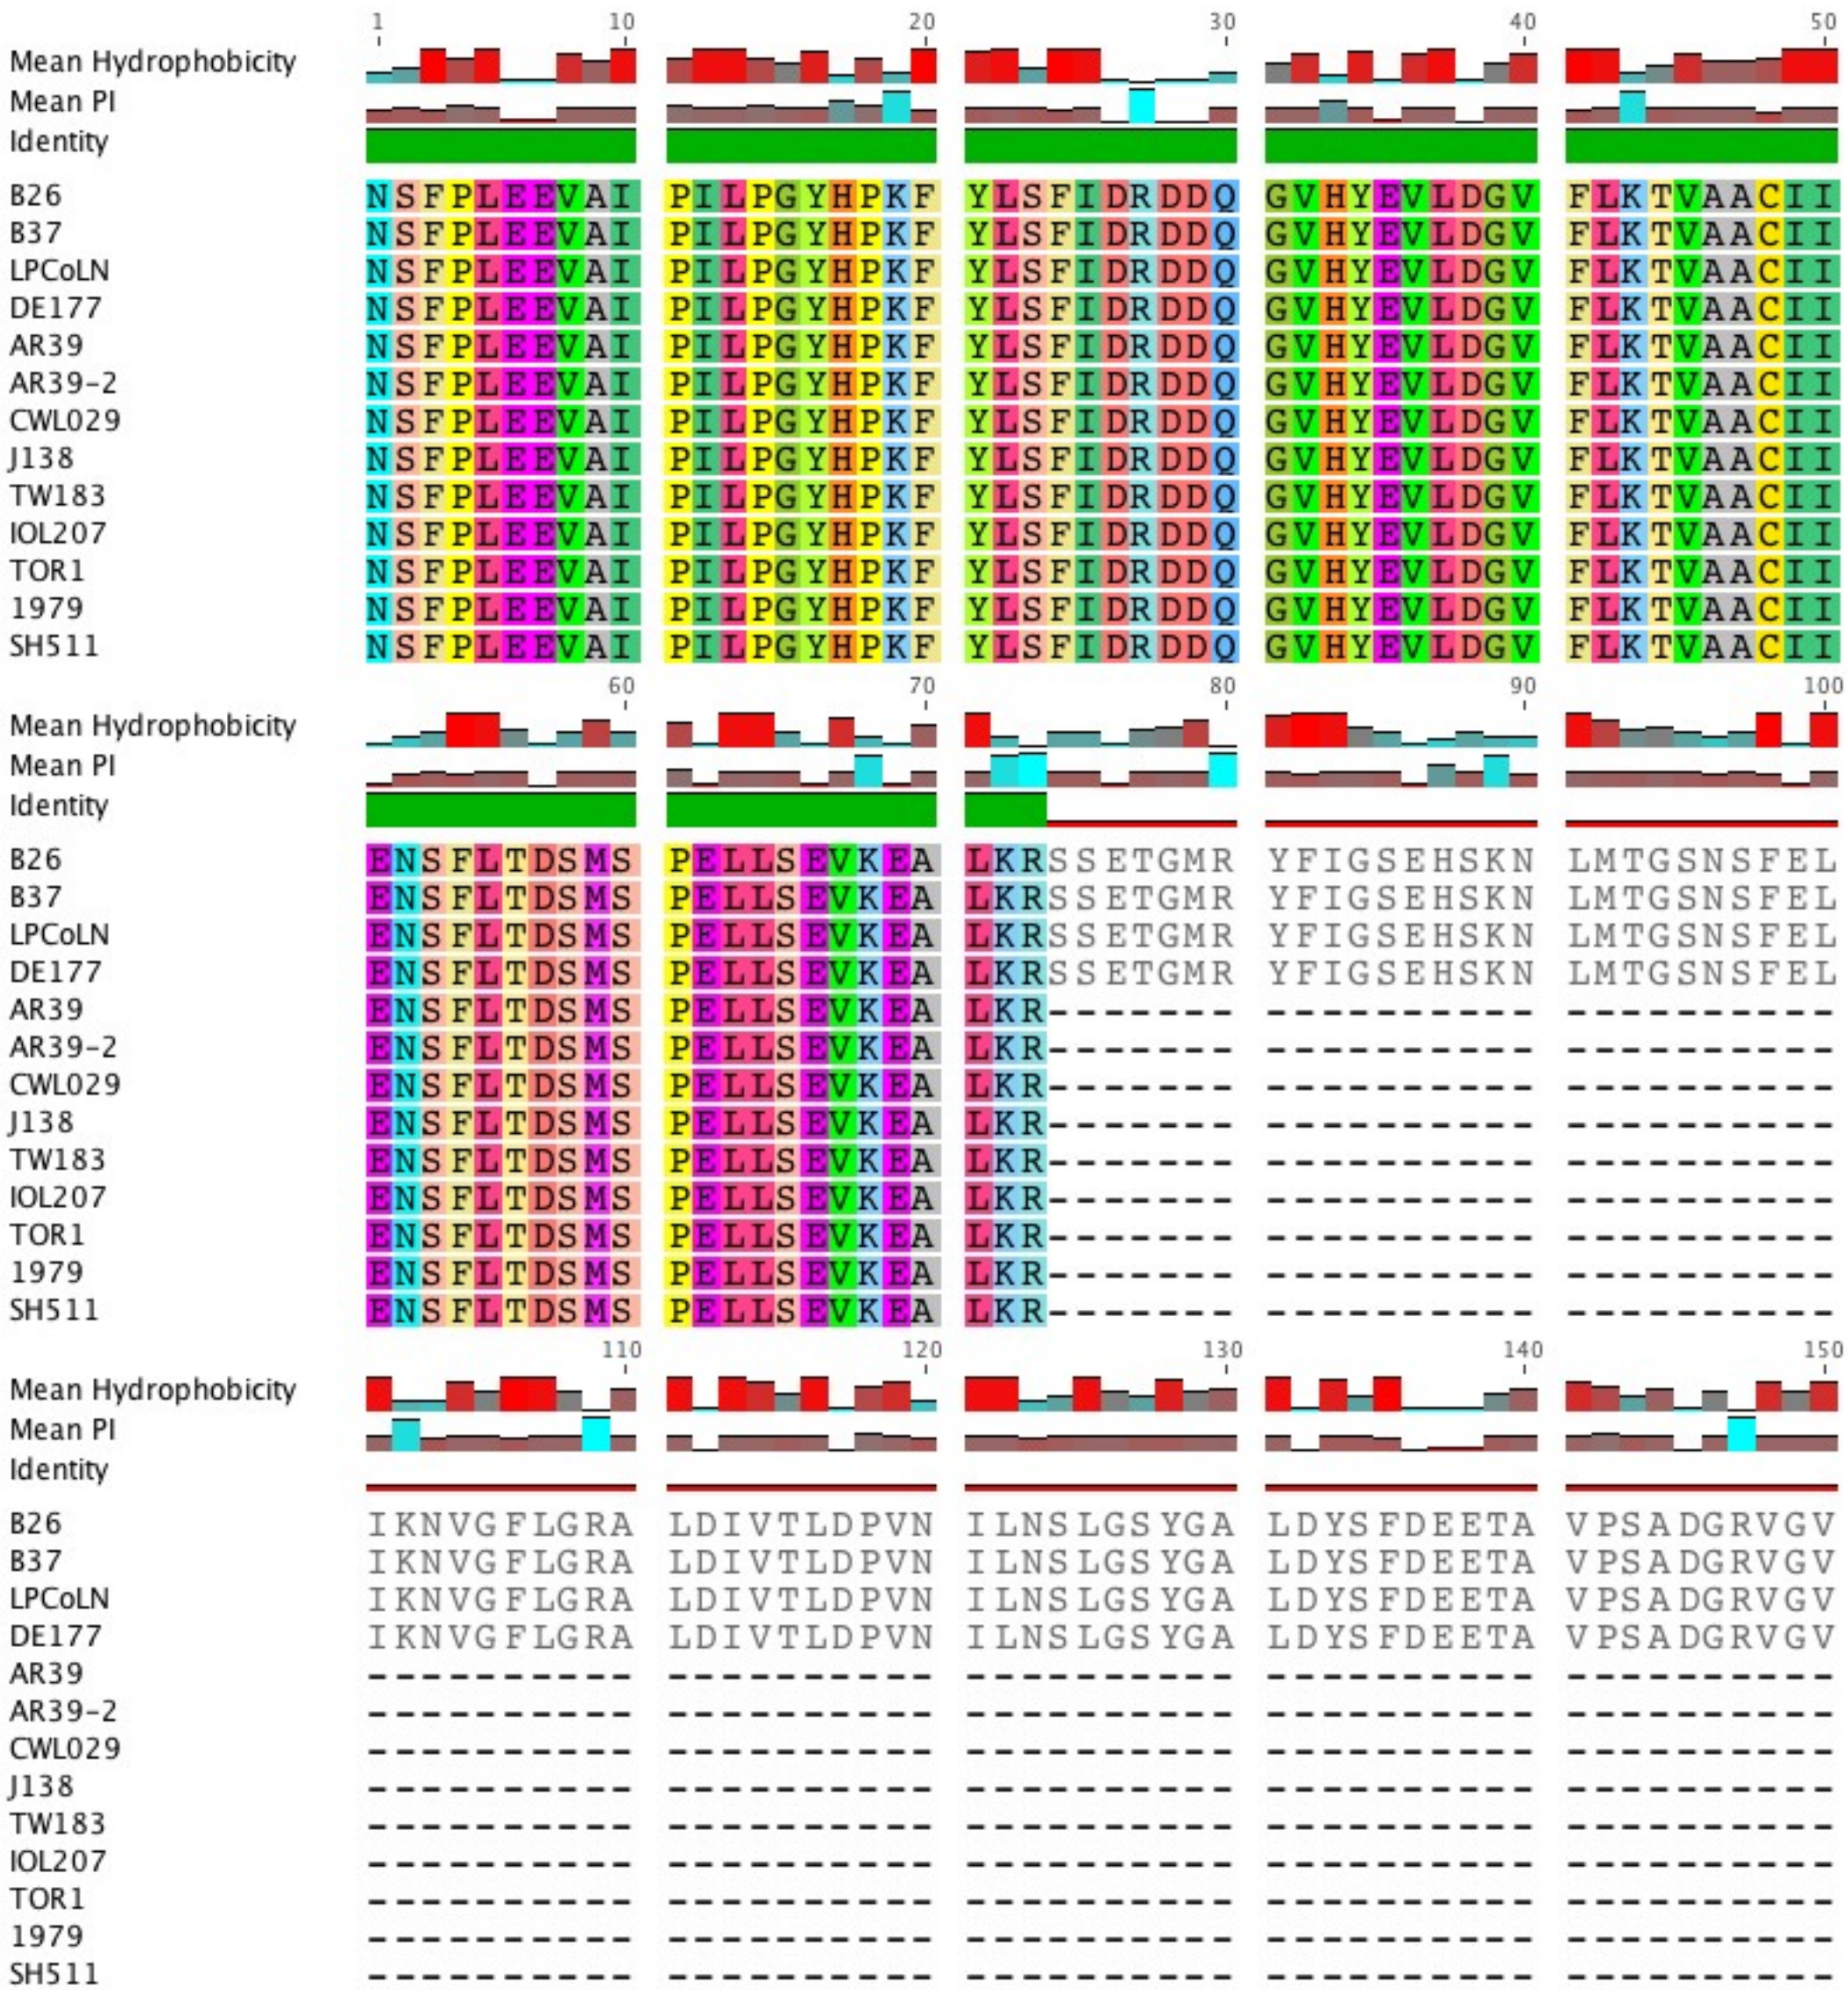

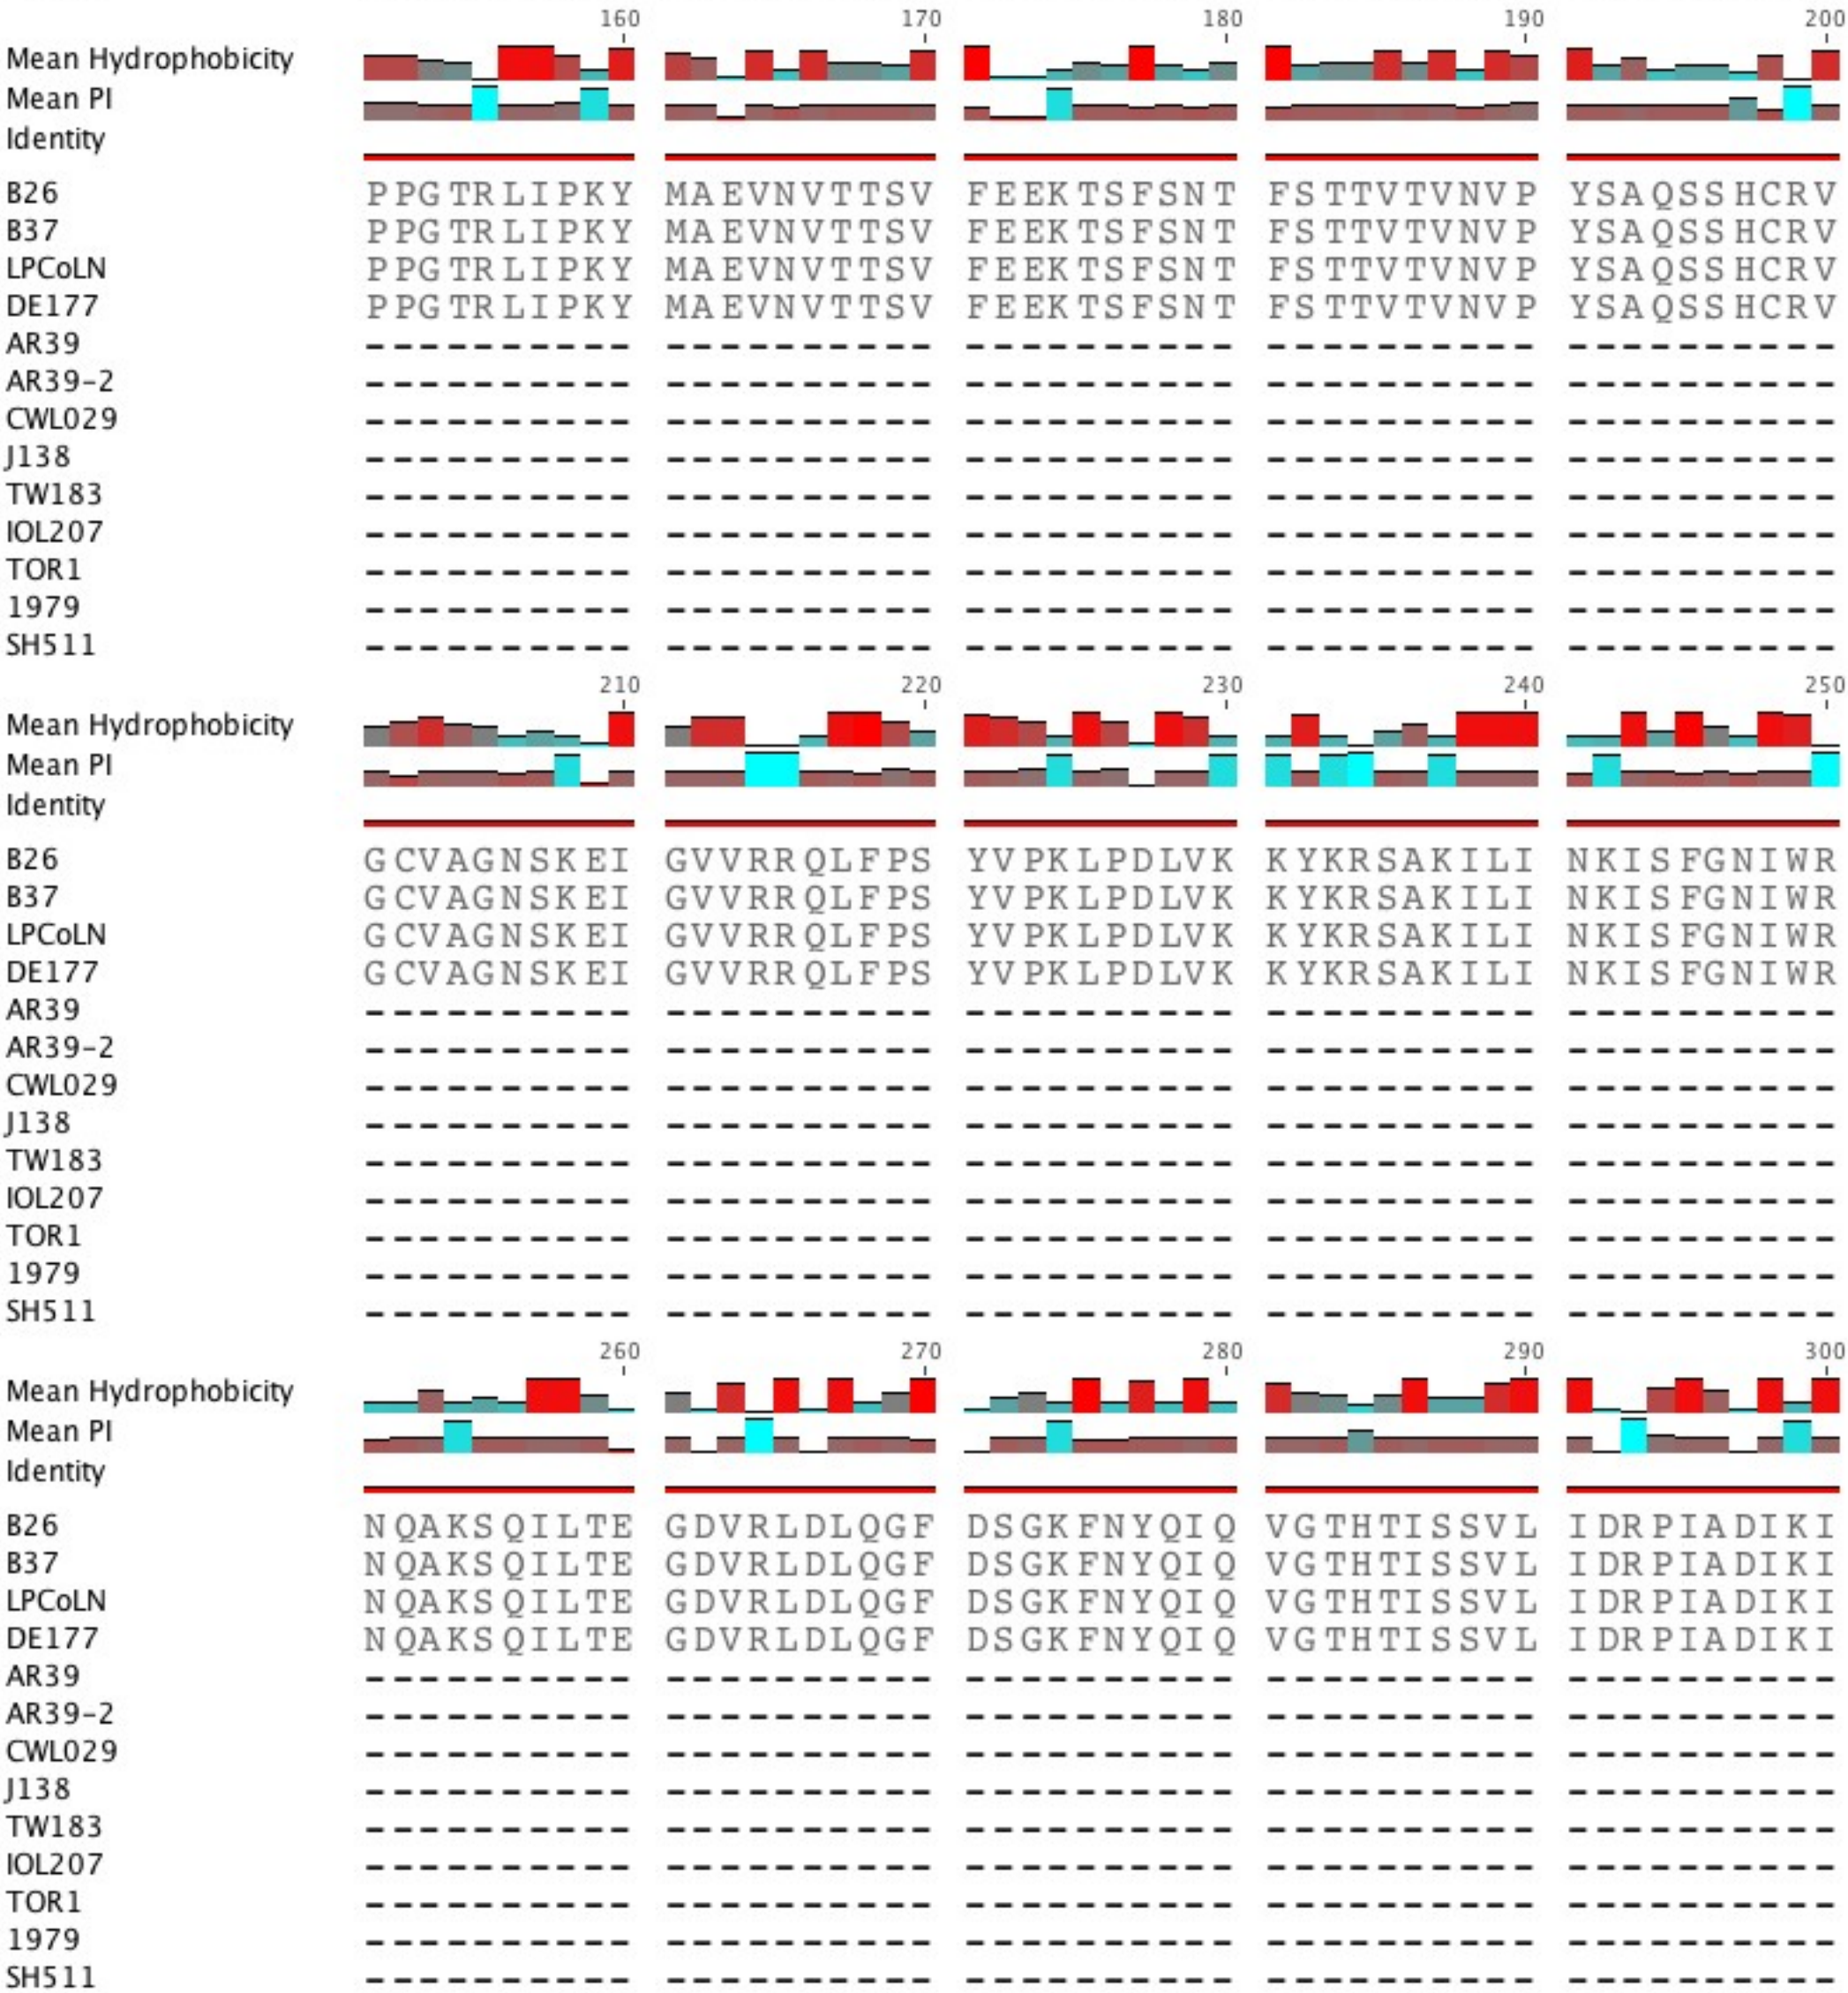

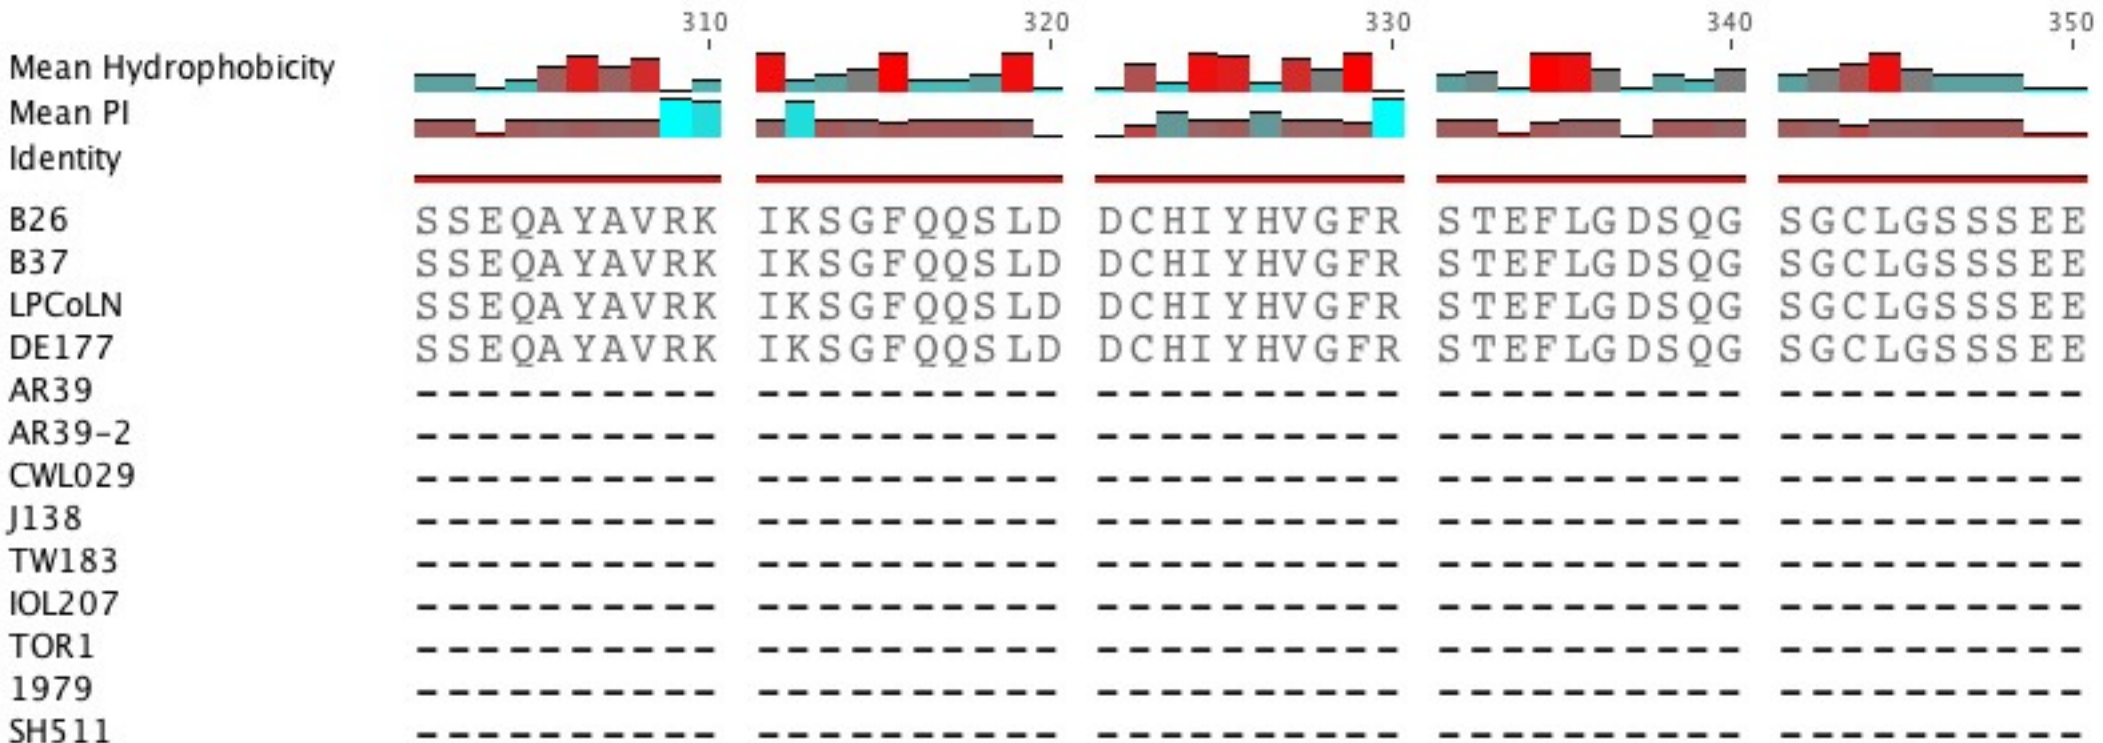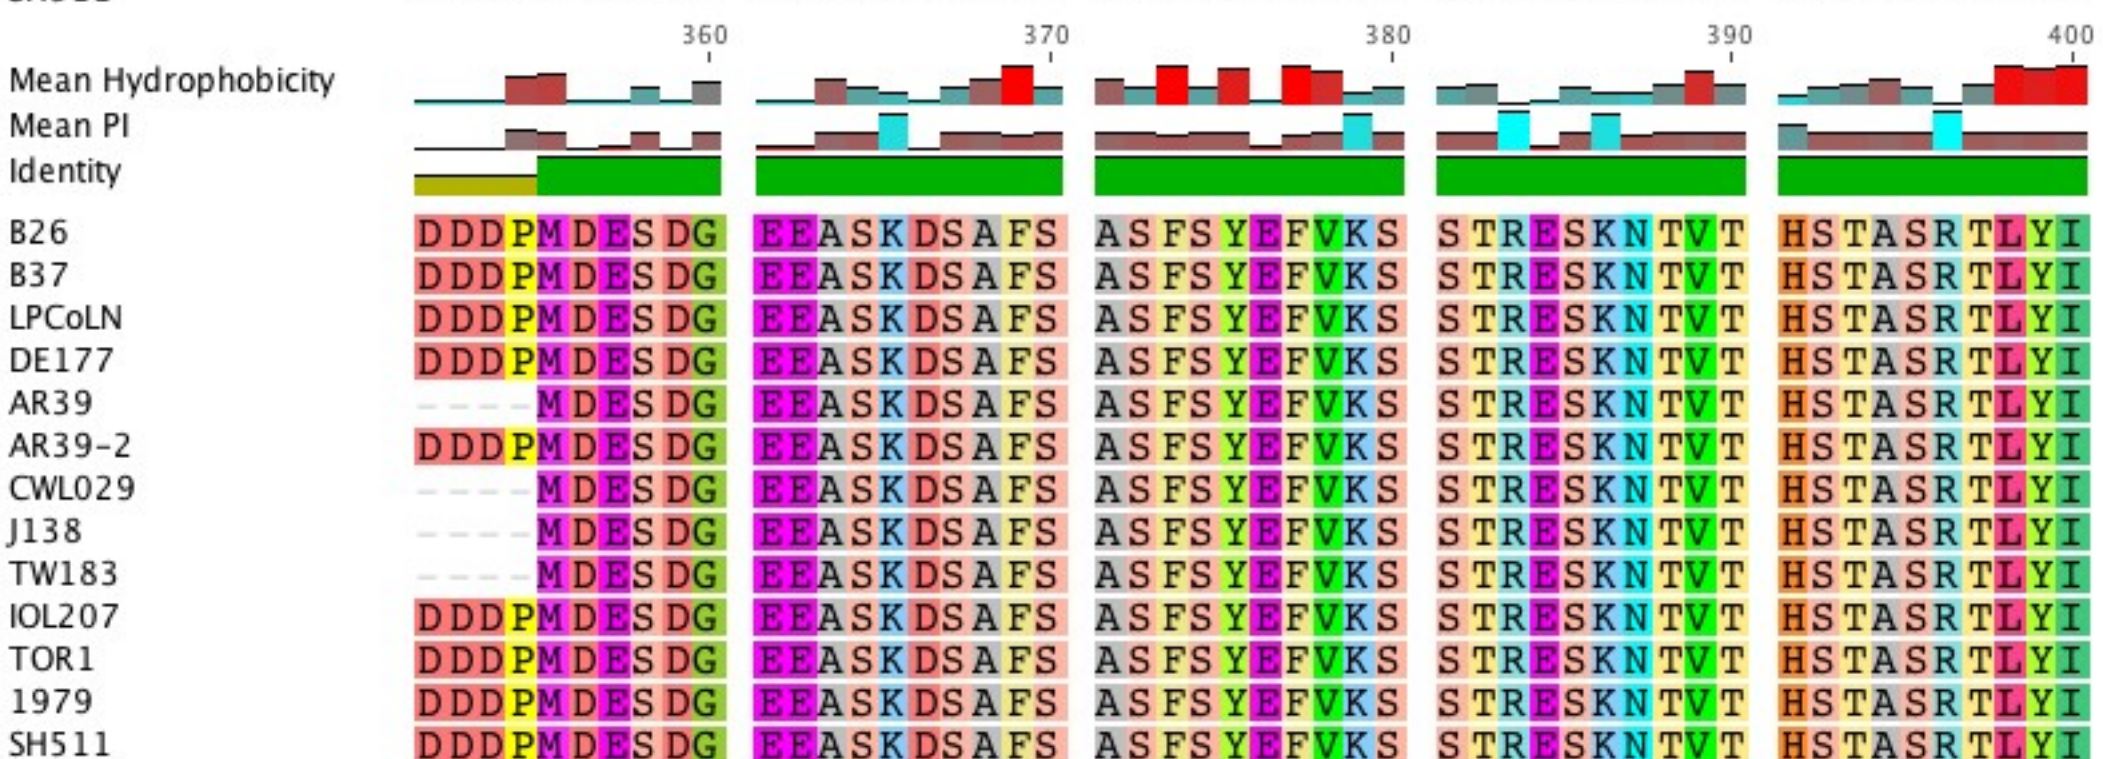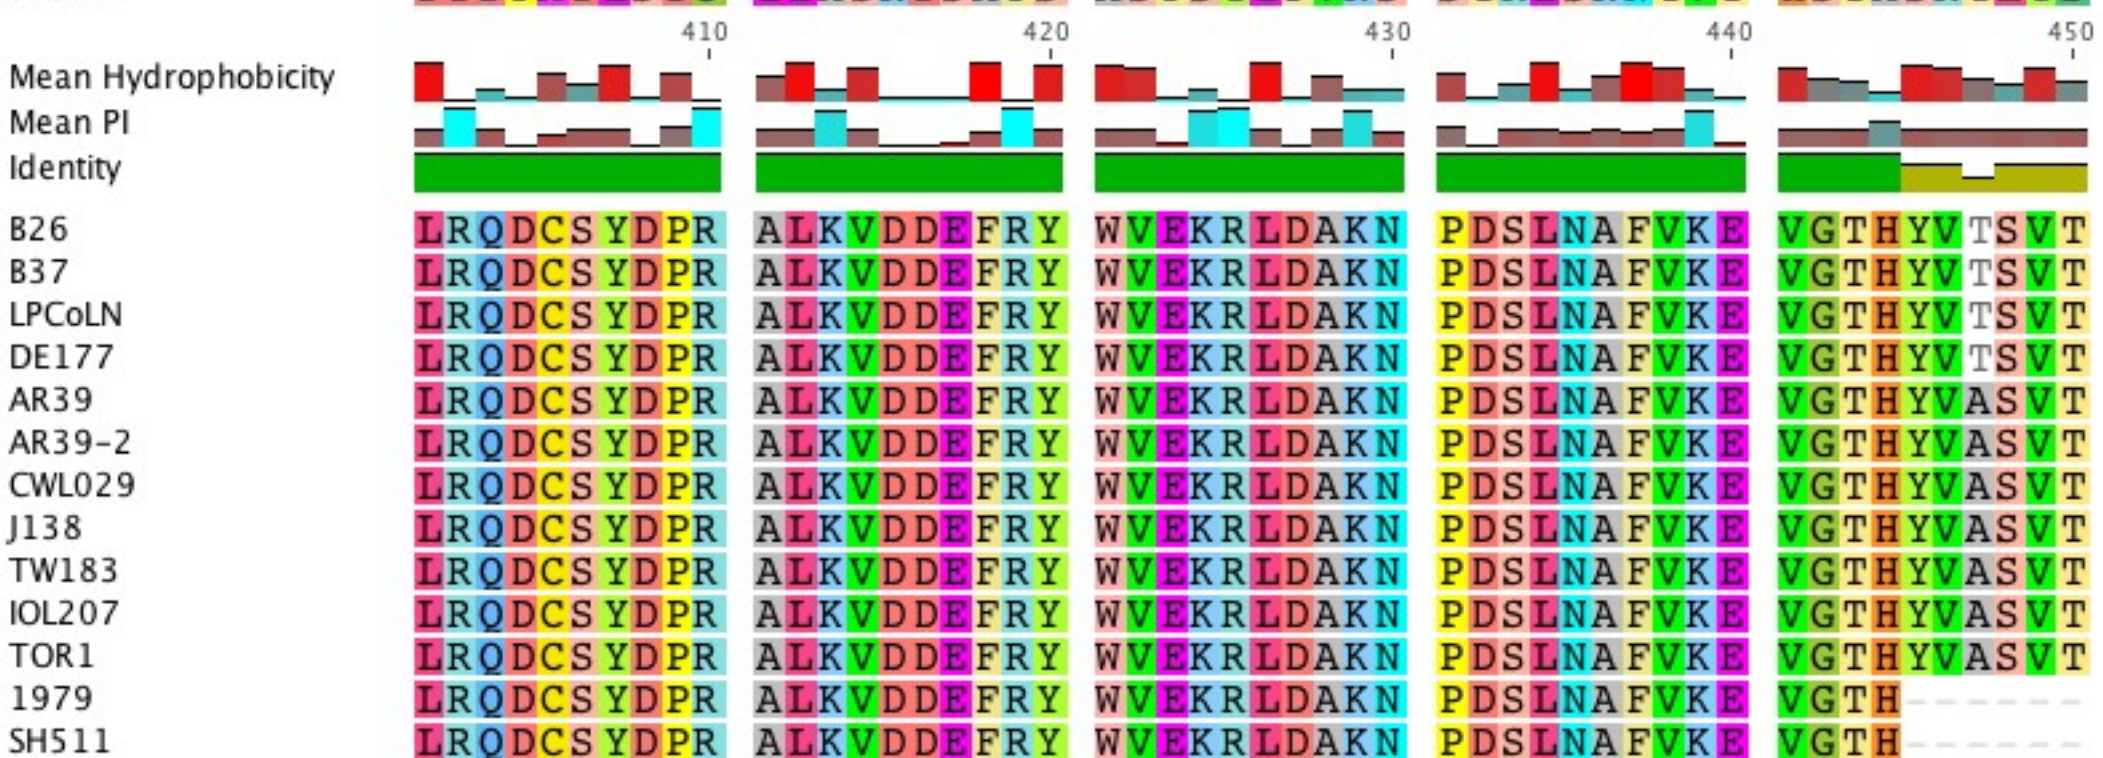



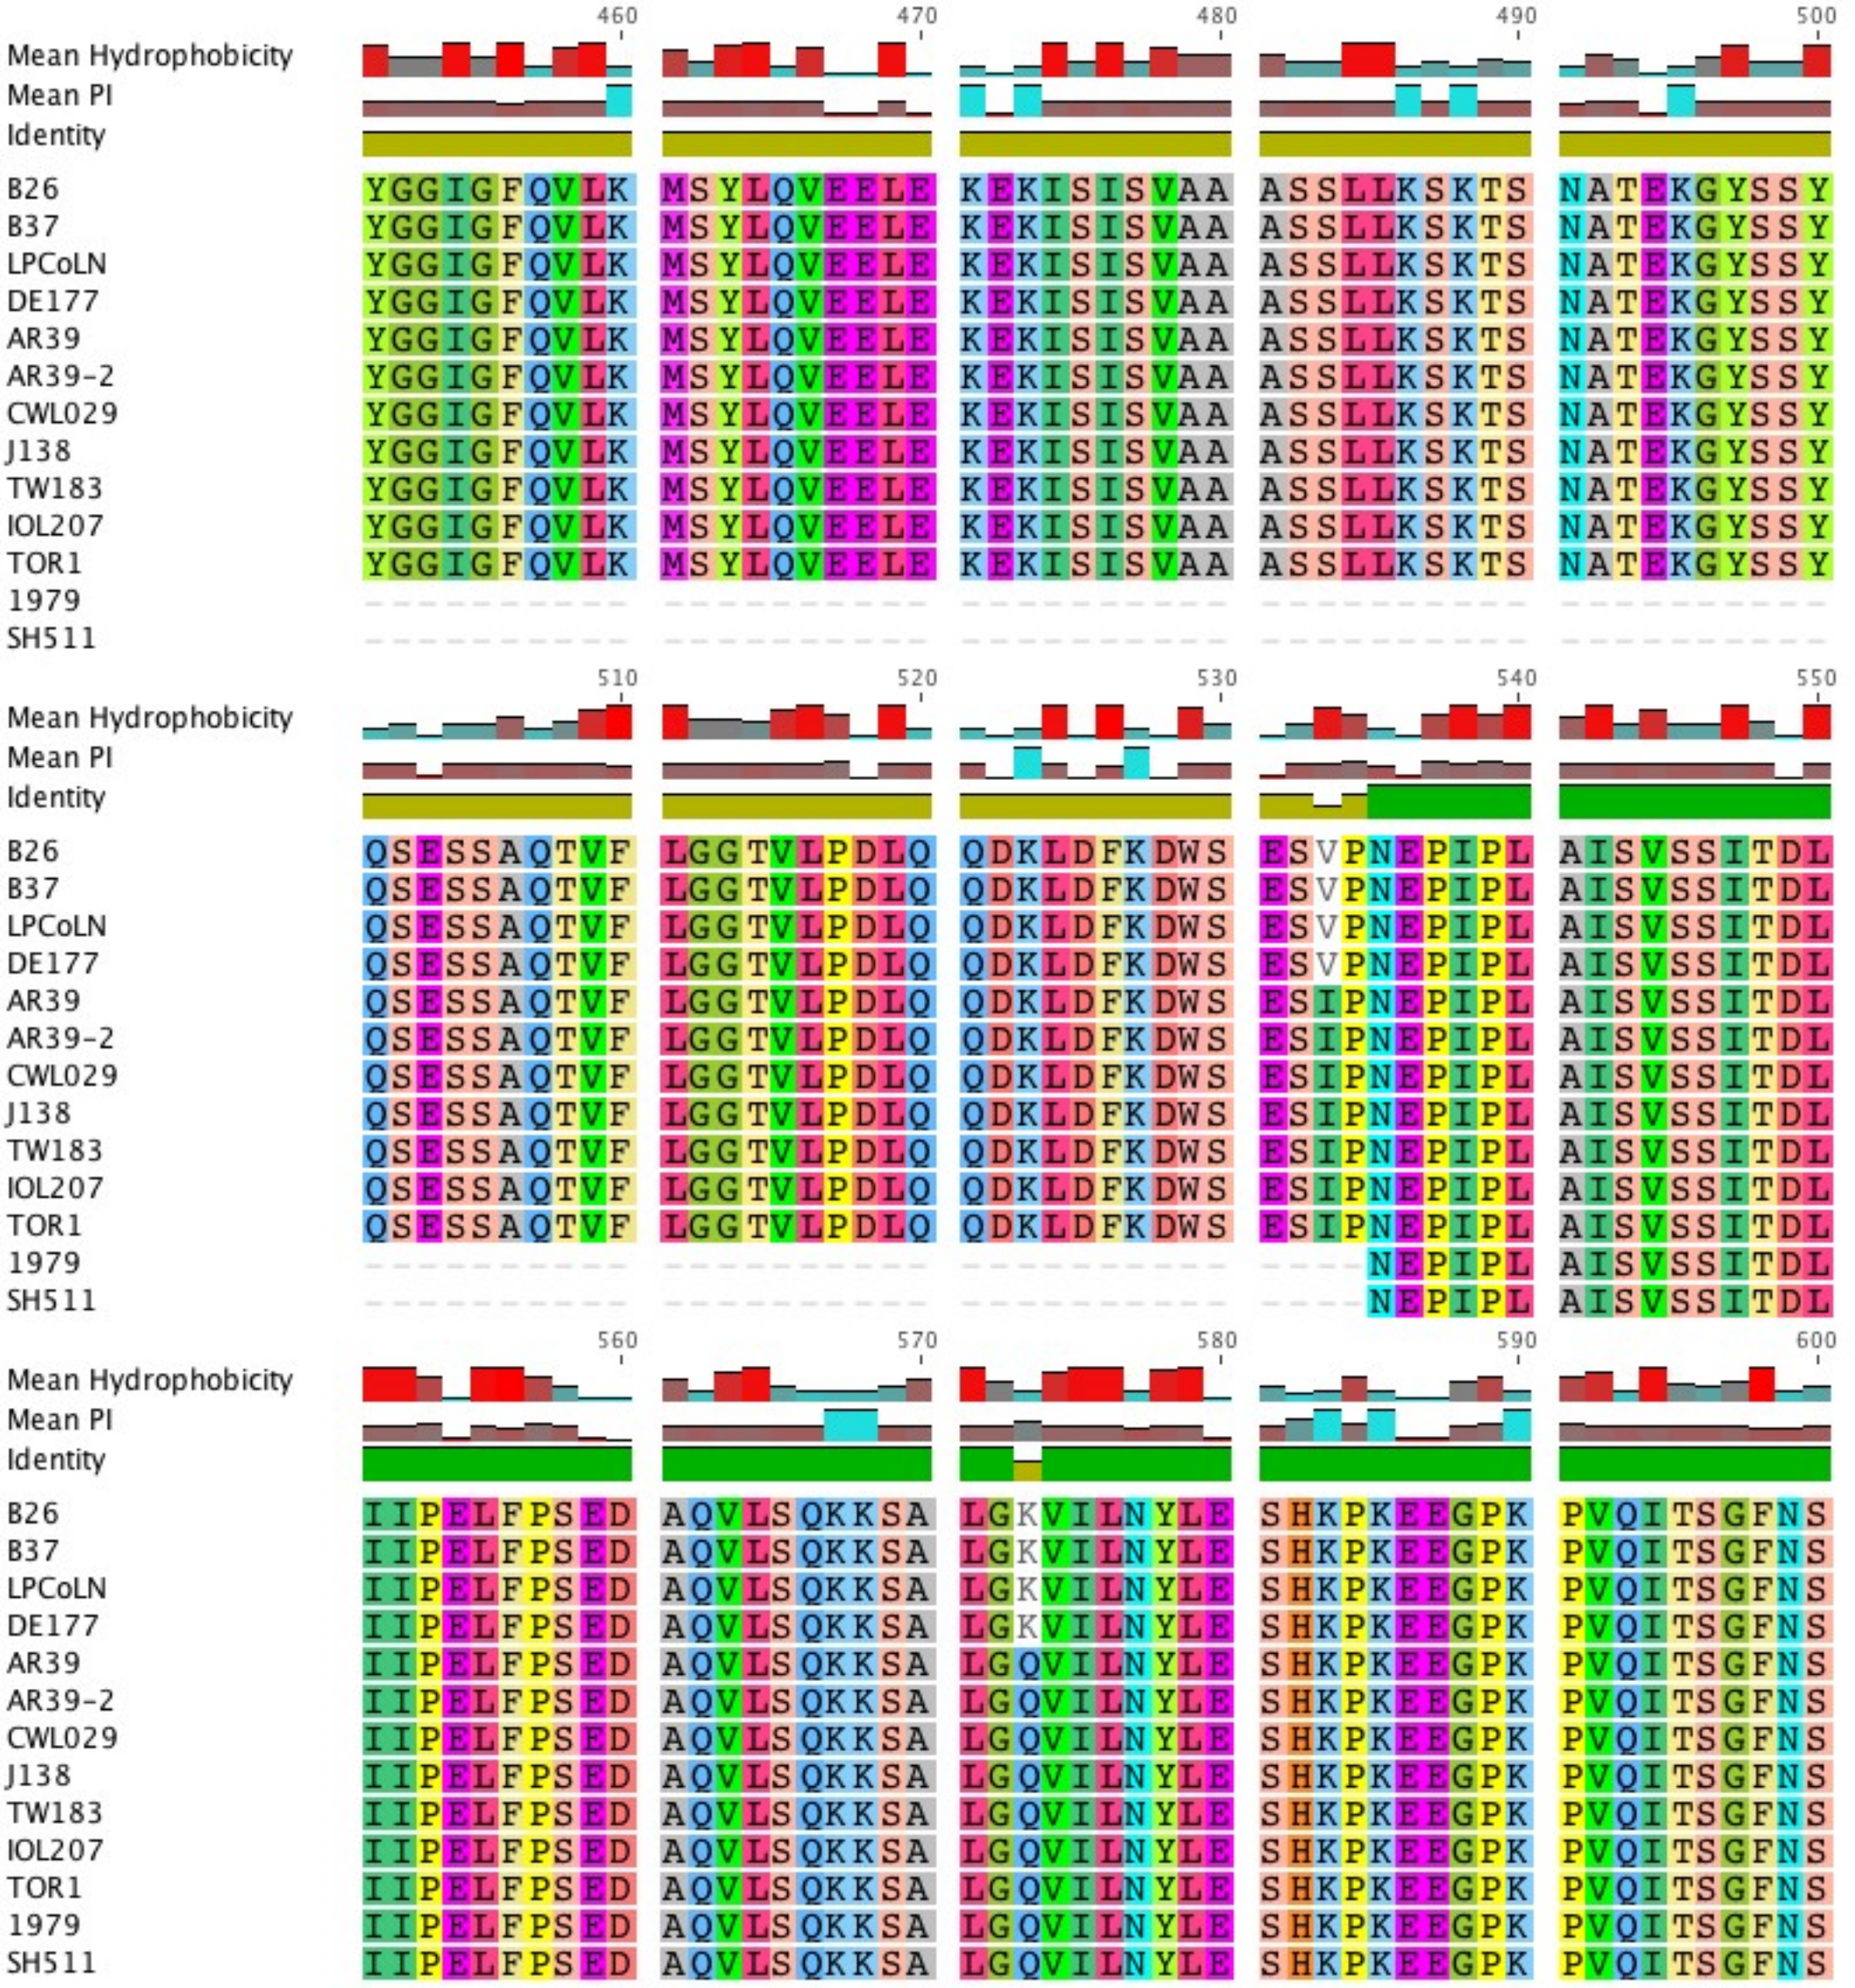

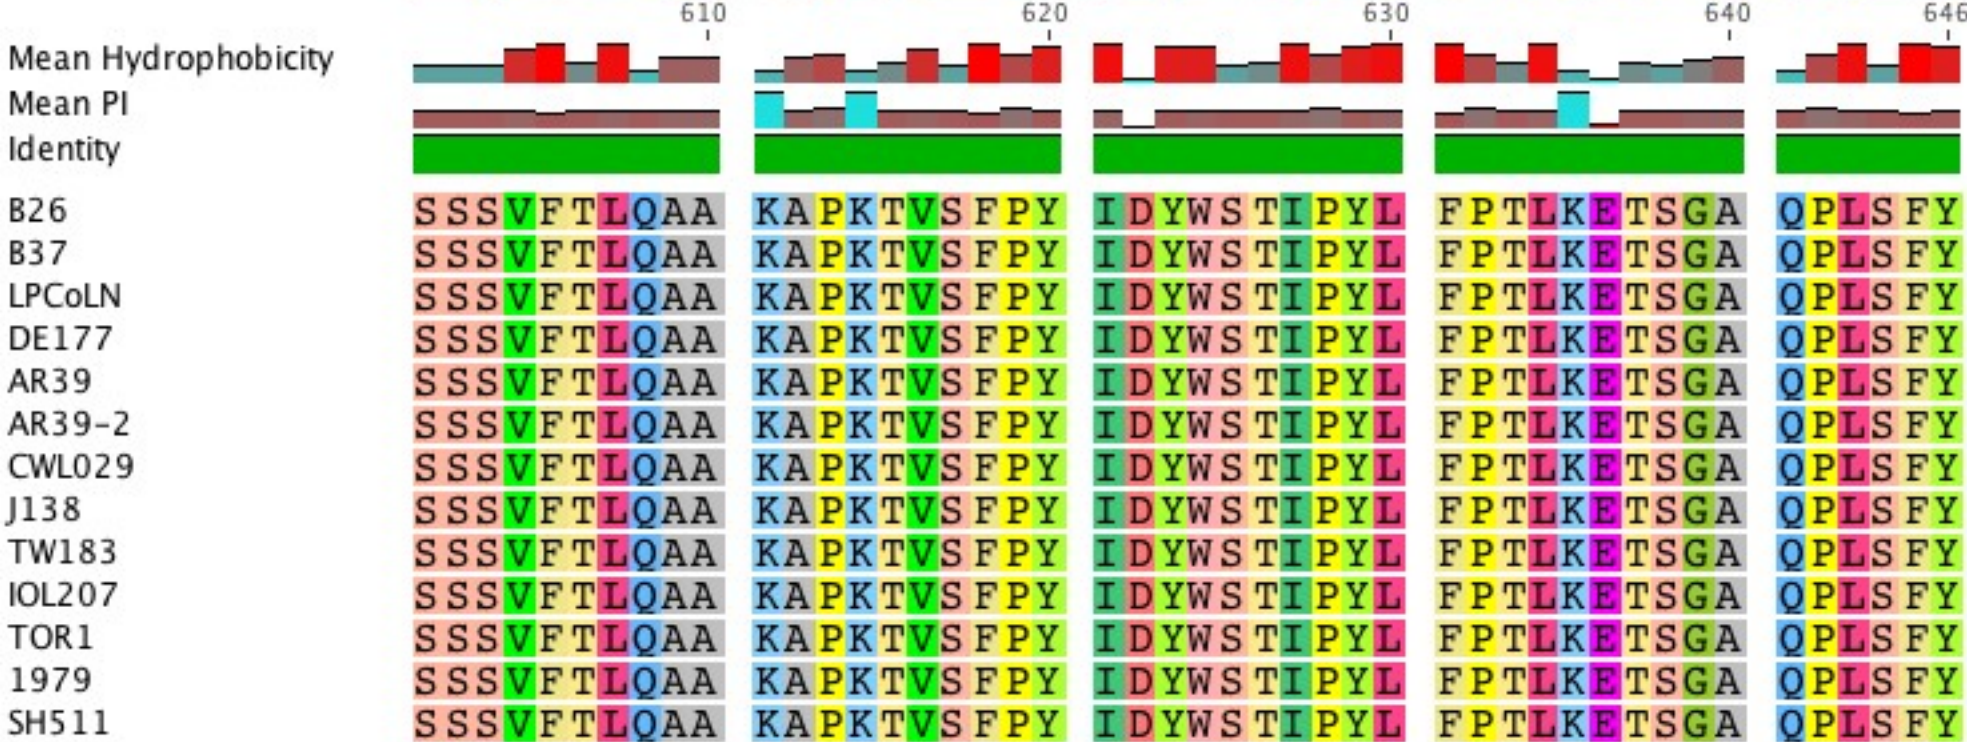

Supplement: ppat.1000903.s003.pdf [file ppat.1000903.s003.pdf]
