# Supplementary material for: Chlamydia pneumoniae Is Genetically Diverse in Animals and Appears to Have Crossed the Host Barrier to Humans on (At Least) Two Occasions
Source: PubMed Central journal article supplement (PMC2873915; doi:10.1371/journal.ppat.1000903), 2010-05-20

|          |            |            |            |             |              |            |            |            |    |
|----------|------------|------------|------------|-------------|--------------|------------|------------|------------|----|
| Identity | 1          | 10         | 20         | 30          | 40           | 50         | 60         | 70         | 80 |
| B26      | TATTCTGAAG | ATTGCTCTAA | AGCTGAGACA | ATCACTTTCC  | CTGTTCTTCC   | AGAACAGCCA | ATCACTCCAA | CGTGCATACT |    |
| LPCoLN   |            |            |            |             |              |            |            |            |    |
| AR39     | TATTCTGAAG | ATTGCTCTAA | AGCTGAGACA | ATCACTTTCC  | CTGTTCTTCC   | AGAACAGCCA | ATCACTCCAA | CGTGCATACT |    |
| CWL029   | TATTCTGAAG | ATTGCTCTAA | AGCTGAGACA | ATCACTTTCC  | CTGTTCTTCC   | AGAACAGCCA | ATCACTCCAA | CGTGCATACT |    |
| J138     | TATTCTGAAG | ATTGCTCTAA | AGCTGAGACA | ATCACTTTCC  | CTGTTCTTCC   | AGAACAGCCA | ATCACTCCAA | CGTGCATACT |    |
| TW183    | TATTCTGAAG | ATTGCTCTAA | AGCTGAGACA | ATCACTTTCC  | CTGTTCTTCC   | AGAACAGCCA | ATCACTCCAA | CGTGCATACT |    |
| TOR1     | TATTCTGAAG | ATTGCTCTAA | AGCTGAGACA | ATCACTTTCC  | CTGTTCTTCC   | AGAACAGCCA | ATCACTCCAA | CGTGCATACT |    |
| WA97001  | TATTCTGAAG | ATTGCTCTAA | AGCTGAGACA | ATCACTTTCC  | CTGTTCTTCC   | AGAACAGCCA | ATCACTCCAA | CGTGCATACT |    |
| 1979     | TATTCTGAAG | ATTGCTCTAA | AGCTGAGACA | ATCACTTTCC  | CTGTTCTTCC   | AGAACAGCCA | ATCACTCCAA | CGTGCATACT |    |
| SH511    | TATTCTGAAG | ATTGCTCTAA | AGCTGAGACA | ATCACTTTCC  | CTGTTCTTCC   | AGAACAGCCA | ATCACTCCAA | CGTGCATACT |    |
| Identity | 90         | 100        | 110        | 120         | 130          | 140        | 150        | 160        |    |
| B26      | CGACCCATA  | TTCCTACTAC | CGAATCATTC | TACAAAAGGA  | AAATAAAGAG   | AAGCAAGCTT | TAGCTCGACA | CAAATGCATT |    |
| LPCoLN   |            |            |            |             |              |            |            |            |    |
| AR39     | CGACCCATA  | TTCCTACTAC | CGAATCATTC | TACAAAAGGA  | AAATAAAGAG   | AAGCAAGCTT | TAGCTCGACA | CAAATGCATT |    |
| CWL029   | CGACCCATA  | TTCCTACTAC | CGAATCATTC | TACAAAAGGA  | AAATAAAGAG   | AAGCAAGCTT | TAGCTCGACA | CAAATGCATT |    |
| J138     | CGACCCATA  | TTCCTACTAC | CGAATCATTC | TACAAAAGGA  | AAATAAAGAG   | AAGCAAGCTT | TAGCTCGACA | CAAATGCATT |    |
| TW183    | CGACCCATA  | TTCCTACTAC | CGAATCATTC | TACAAAAGGA  | AAATAAAGAG   | AAGCAAGCTT | TAGCTCGACA | CAAATGCATT |    |
| TOR1     | CGACCCATA  | TTCCTACTAC | CGAATCATTC | TACAAAAGGA  | AAATAAAGAG   | AAGCAAGCTT | TAGCTCGACA | CAAATGCATT |    |
| WA97001  | CGACCCATA  | TTCCTACTAC | CGAATCATTC | TACAAAAGGA  | AAATAAAGAG   | AAGCAAGCTT | TAGCTCGACA | CAAATGCATT |    |
| 1979     | CGACCCATA  | TTCCTACTAC | CGAATCATTC | TACAAAAGGA  | AAATAAAGAG   | AAGCAAGCTT | TAGCTCGACA | CAAATGCATT |    |
| SH511    | CGACCCATA  | TTCCTACTAC | CGAATCATTC | TACAAAAGGA  | AAATAAAGAG   | AAGCAAGCTT | TAGCTCGACA | CAAATGCATT |    |
| Identity | 170        | 180        | 190        | 200         | 210          | 220        | 230        | 240        |    |
| B26      | TCTATTTTAG | AATTTTTCAA | AAACTTACTC | TTTGTTCA TC | TTC TGT CATT | ATCAAAGAAT | CAAAGGGAAG | GTTGCTCCAC |    |
| LPCoLN   |            |            |            |             |              |            |            |            |    |
| AR39     | TCTATTTTAG | AATTTTTCAA | AAACTTACTC | TTTGTTCA TC | TTC TGT CATT | ATCAAAGAAT | CAAAGGGAAG | GTTGCTCCAC |    |
| CWL029   | TCTATTTTAG | AATTTTTCAA | AAACTTACTC | TTTGTTCA TC | TTC TGT CATT | ATCAAAGAAT | CAAAGGGAAG | GTTGCTCCAC |    |
| J138     | TCTATTTTAG | AATTTTTCAA | AAACTTACTC | TTTGTTCA TC | TTC TGT CATT | ATCAAAGAAT | CAAAGGGAAG | GTTGCTCCAC |    |
| TW183    | TCTATTTTAG | AATTTTTCAA | AAACTTACTC | TTTGTTCA TC | TTC TGT CATT | ATCAAAGAAT | CAAAGGGAAG | GTTGCTCCAC |    |
| TOR1     | TCTATTTTAG | AATTTTTCAA | AAACTTACTC | TTTGTTCA TC | TTC TGT CATT | ATCAAAGAAT | CAAAGGGAAG | GTTGCTCCAC |    |
| WA97001  | TCTATTTTAG | AATTTTTCAA | AAACTTACTC | TTTGTTCA TC | TTC TGT CATT | ATCAAAGAAT | CAAAGGGAAG | GTTGCTCCAC |    |
| 1979     | TCTATTTTAG | AATTTTTCAA | AAACTTACTC | TTTGTTCA TC | TTC TGT CATT | ATCAAAGAAT | CAAAGGGAAG | GTTGCTCCAC |    |
| SH511    | TCTATTTTAG | AATTTTTCAA | AAACTTACTC | TTTGTTCA TC | TTC TGT CATT | ATCAAAGAAT | CAAAGGGAAG | GTTGCTCCAC |    |
| Identity | 250        | 260        | 270        | 280         | 290          | 300        | 310        | 320        |    |
| B26      | TGATATGGCT | GTTGTAAGCA | CTCCGTTTTT | TAATCA GAAT | TTATGGTATC   | GACTCCTTTC | CTCACGGTTT | TCTCTATGGA |    |
| LPCoLN   | ATGGCT     | GTTGTAAGCA | CTCCGTTTTT | TAATCA GAAT | TTATGGTATC   | GACTCCTTTC | CTCACGGTTT | TCTCTATGGA |    |
| AR39     | TGATATGGCT | GTTGTAAGCA | CTCCCTTTTT | TAATCGGAAT  | TTATGGTATC   | GACTCCTTTC | CTCACGGTTT | TCTCTATGGA |    |
| CWL029   | TGATATGGCT | GTTGTAAGCA | CTCCCTTTTT | TAATCGGAAT  | TTATGGTATC   | GACTCCTTTC | CTCACGGTTT | TCTCTATGGA |    |
| J138     | TGATATGGCT | GTTGTAAGCA | CTCCCTTTTT | TAATCGGAAT  | TTATGGTATC   | GACTCCTTTC | CTCACGGTTT | TCTCTATGGA |    |
| TW183    | TGATATGGCT | GTTGTAAGCA | CTCCCTTTTT | TAATCGGAAT  | TTATGGTATC   | GACTCCTTTC | CTCACGGTTT | TCTCTATGGA |    |
| TOR1     | TGATATGGCT | GTTGTAAGCA | CTCCCTTTTT | TAATCGGAAT  | TTATGGTATC   | GACTCCTTTC | CTCACGGTTT | TCTCTATGGA |    |
| WA97001  | TGATATGGCT | GTTGTAAGCA | CTCCCTTTTT | TAATCGGAAT  | TTATGGTATC   | GACTCCTTTC | CTCACGGTTT | TCTCTATGGA |    |
| 1979     | TGATATGGCT | GTTGTAAGCA | CTCCCTTTTT | TAATCGGAAT  | TTATGGTATC   | GACTCCTTTC | CTCACGGTTT | TCTCTATGGA |    |
| SH511    | TGATATGGCT | GTTGTAAGCA | CTCCCTTTTT | TAATCGGAAT  | TTATGGTATC   | GACTCCTTTC | CTCACGGTTT | TCTCTATGGA |    |

|          | 330        | 340        | 350        | 360        | 370        | 380        | 390        | 400        |
|----------|------------|------------|------------|------------|------------|------------|------------|------------|
| Identity |            |            |            |            |            |            |            |            |
| B26      | AAAGCTATTG | TCCAAGATTT | TTTCTTGATT | ACTTAGAAGC | TTTCGGTCTC | CTTTCTGATT | TCTTAGACCA | TCAAGCAGTC |
| LPCoLN   | AAAGCTATTG | TCCAAGATTT | TTTCTTGATT | ACTTAGAAGC | TTTCGGTCTC | CTTTCTGATT | TCTTAGACCA | TCAAGCAGTC |
| AR39     | AAAGCTATTG | TCCAAGATTT | TTTCTTGATT | ACTTAGAAGC | TTTCGGTCTC | CTTTCTGATT | TCTTAGACCA | TCAAGCAGTC |
| CWL029   | AAAGCTATTG | TCCAAGATTT | TTTCTTGATT | ACTTAGAAGC | TTTCGGTCTC | CTTTCTGATT | TCTTAGACCA | TCAAGCAGTC |
| J138     | AAAGCTATTG | TCCAAGATTT | TTTCTTGATT | ACTTAGAAGC | TTTCGGTCTC | CTTTCTGATT | TCTTAGACCA | TCAAGCAGTC |
| TW183    | AAAGCTATTG | TCCAAGATTT | TTTCTTGATT | ACTTAGAAGC | TTTCGGTCTC | CTTTCTGATT | TCTTAGACCA | TCAAGCAGTC |
| TOR1     | AAAGCTATTG | TCCAAGATTT | TTTCTTGATT | ACTTAGAAGC | TTTCGGTCTC | CTTTCTGATT | TCTTAGACCA | TCAAGCAGTC |
| WA97001  | AAAGCTATTG | TCCAAGATTT | TTTCTTGATT | ACTTAGAAGC | TTTCGGTCTC | CTTTCTGATT | TCTTAGACCA | TCAAGCAGTC |
| 1979     | AAAGCTATTG | TCCAAGATTT | TTTCTTGATT | ACTTAGAAGC | TTTCGGTCTC | CTTTCTGATT | TCTTAGACCA | TCAAGCAGTC |
| SH511    | AAAGCTATTG | TCCAAGATTT | TTTCTTGATT | ACTTAGAAGC | TTTCGGTCTC | CTTTCTGATT | TCTTAGACCA | TCAAGCAGTC |

|          | 410        | 420        | 430        | 440         | 450        | 460        | 470        | 480        |
|----------|------------|------------|------------|-------------|------------|------------|------------|------------|
| Identity |            |            |            |             |            |            |            |            |
| B26      | ATTAAATTCT | TCGAATTAGA | AACACATTTT | TCC TATTATC | CCGTTTCAGG | ATTTGTAGCT | CCCCATCAAT | ACTTGTCTCT |
| LPCoLN   | ATTAAATTCT | TCGAATTAGA | AACACATTTT | TCC TATTATC | CCGTTTCAGG | ATTTGTAGCT | CCCCATCAAT | ACTTGTCTCT |
| AR39     | ATTAAATTCT | TCGAATTAGA | AACACATTTT | TCC TATTATC | CCGTTTCAGG | ATTTGTAGCT | CCCCATCAAT | ACTTGTCTCT |
| CWL029   | ATTAAATTCT | TCGAATTAGA | AACACATTTT | TCC TATTATC | CCGTTTCAGG | ATTTGTAGCT | CCCCATCAAT | ACTTGTCTCT |
| J138     | ATTAAATTCT | TCGAATTAGA | AACACATTTT | TCC TATTATC | CCGTTTCAGG | ATTTGTAGCT | CCCCATCAAT | ACTTGTCTCT |
| TW183    | ATTAAATTCT | TCGAATTAGA | AACACATTTT | TCC TATTATC | CCGTTTCAGG | ATTTGTAGCT | CCCCATCAAT | ACTTGTCTCT |
| TOR1     | ATTAAATTCT | TCGAATTAGA | AACACATTTT | TCC TATTATC | CCGTTTCAGG | ATTTGTAGCT | CCCCATCAAT | ACTTGTCTCT |
| WA97001  | ATTAAATTCT | TCGAATTAGA | AACACATTTT | TCC TATTATC | CCGTTTCAGG | ATTTGTAGCT | CCCCATCAAT | ACTTGTCTCT |
| 1979     | ATTAAATTCT | TCGAATTAGA | AACACATTTT | TCC TATTATC | CCGTTTCAGG | ATTTGTAGCT | CCCCATCAAT | ACTTGTCTCT |
| SH511    | ATTAAATTCT | TCGAATTAGA | AACACATTTT | TCC TATTATC | CCGTTTCAGG | ATTTGTAGCT | CCCCATCAAT | ACTTGTCTCT |

|          | 490        | 500        | 510         | 520         | 530        | 540        | 550        | 560        |
|----------|------------|------------|-------------|-------------|------------|------------|------------|------------|
| Identity |            |            |             |             |            |            |            |            |
| B26      | GTTGCAGGAC | CGTTACTTTC | CCATTGCCCTC | TGTAATGC GA | ACTCTCGATA | AAGATAATTT | CTCCTTAACT | CCTGATCTCA |
| LPCoLN   | GTTGCAGGAC | CGTTACTTTC | CCATTGCCCTC | TGTAATGC GA | ACTCTCGATA | AAGATAATTT | CTCCTTAACT | CCTGATCTCA |
| AR39     | GTTGCAGGAC | CGTTACTTTC | CCATTGCCCTC | TGTAATGC GA | ACTCTCGATA | AAGATAATTT | CTCCTTAACT | CCTGATCTCA |
| CWL029   | GTTGCAGGAC | CGTTACTTTC | CCATTGCCCTC | TGTAATGC GA | ACTCTCGATA | AAGATAATTT | CTCCTTAACT | CCTGATCTCA |
| J138     | GTTGCAGGAC | CGTTACTTTC | CCATTGCCCTC | TGTAATGC GA | ACTCTCGATA | AAGATAATTT | CTCCTTAACT | CCTGATCTCA |
| TW183    | GTTGCAGGAC | CGTTACTTTC | CCATTGCCCTC | TGTAATGC GA | ACTCTCGATA | AAGATAATTT | CTCCTTAACT | CCTGATCTCA |
| TOR1     | GTTGCAGGAC | CGTTACTTTC | CCATTGCCCTC | TGTAATGC GA | ACTCTCGATA | AAGATAATTT | CTCCTTAACT | CCTGATCTCA |
| WA97001  | GTTGCAGGAC | CGTTACTTTC | CCATTGCCCTC | TGTAATGC GA | ACTCTCGATA | AAGATAATTT | CTCCTTAACT | CCTGATCTCA |
| 1979     | GTTGCAGGAC | CGTTACTTTC | CCATTGCCCTC | TGTAATGC GA | ACTCTCGATA | AAGATAATTT | CTCCTTAACT | CCTGATCTCA |
| SH511    | GTTGCAGGAC | CGTTACTTTC | CCATTGCCCTC | TGTAATGC GA | ACTCTCGATA | AAGATAATTT | CTCCTTAACT | CCTGATCTCA |

|          | 570        | 580        | 590        | 600         | 610        | 620         | 630        | 640        |
|----------|------------|------------|------------|-------------|------------|-------------|------------|------------|
| Identity |            |            |            |             |            |             |            |            |
| B26      | TCCATGACCT | TTTAGGGCAC | GTGCCTTGGC | TTC TACATCC | CTCATTTTCT | GAATTTTTC A | TAAACATGGG | AAGACTCTTC |
| LPCoLN   | TCCATGACCT | TTTAGGGCAC | GTGCCTTGGC | TTC TACATCC | CTCATTTTCT | GAATTTTTC A | TAAACATGGG | AAGACTCTTC |
| AR39     | TCCATGACCT | TTTAGGGCAC | GTGCCTTGGC | TTC TACATCC | CTCATTTTCT | GAATTTTTC A | TAAACATGGG | AAGACTCTTC |
| CWL029   | TCCATGACCT | TTTAGGGCAC | GTGCCTTGGC | TTC TACATCC | CTCATTTTCT | GAATTTTTC A | TAAACATGGG | AAGACTCTTC |
| J138     | TCCATGACCT | TTTAGGGCAC | GTGCCTTGGC | TTC TACATCC | CTCATTTTCT | GAATTTTTC A | TAAACATGGG | AAGACTCTTC |
| TW183    | TCCATGACCT | TTTAGGGCAC | GTGCCTTGGC | TTC TACATCC | CTCATTTTCT | GAATTTTTC A | TAAACATGGG | AAGACTCTTC |
| TOR1     | TCCATGACCT | TTTAGGGCAC | GTGCCTTGGC | TTC TACATCC | CTCATTTTCT | GAATTTTTC A | TAAACATGGG | AAGACTCTTC |
| WA97001  | TCCATGACCT | TTTAGGGCAC | GTGCCTTGGC | TTC TACATCC | CTCATTTTCT | GAATTTTTC A | TAAACATGGG | AAGACTCTTC |
| 1979     | TCCATGACCT | TTTAGGGCAC | GTGCCTTGGC | TTC TACATCC | CTCATTTTCT | GAATTTTTC A | TAAACATGGG | AAGACTCTTC |
| SH511    | TCCATGACCT | TTTAGGGCAC | GTGCCTTGGC | TTC TACATCC | CTCATTTTCT | GAATTTTTC A | TAAACATGGG | AAGACTCTTC |

|          |                                                                                     |                                                                                     |                                                                                      |                                                                                       |                                                                                       |                                                                                       |                                                                                       |                                                                                       |
|----------|-------------------------------------------------------------------------------------|-------------------------------------------------------------------------------------|--------------------------------------------------------------------------------------|---------------------------------------------------------------------------------------|---------------------------------------------------------------------------------------|---------------------------------------------------------------------------------------|---------------------------------------------------------------------------------------|---------------------------------------------------------------------------------------|
| Identity |      |      |      |      |      |      |      |      |
| B26      | ACTAAAGTCA                                                                          | TAGAAAAAGT                                                                          | ACAAGCTCTT                                                                           | CCTAGTAAAA                                                                            | AACAACGCAT                                                                            | ACAAACCCTA                                                                            | CAAAGCAATC                                                                            | TGATCGCTAT                                                                            |
| LPCoLN   | ACTAAAGTCA                                                                          | TAGAAAAAGT                                                                          | ACAAGCTCTT                                                                           | CCTAGTAAAA                                                                            | AACAACGCAT                                                                            | ACAAACCCTA                                                                            | CAAAGCAATC                                                                            | TGATCGCTAT                                                                            |
| AR39     | ACTAAAGTCA                                                                          | TAGAAAAAGT                                                                          | ACAAGCTCTT                                                                           | CCTAGTAAAA                                                                            | AACAACGCAT                                                                            | ACAAACCCTA                                                                            | CAAAGCAATC                                                                            | TGATCGCTAT                                                                            |
| CWL029   | ACTAAAGTCA                                                                          | TAGAAAAAGT                                                                          | ACAAGCTCTT                                                                           | CCTAGTAAAA                                                                            | AACAACGCAT                                                                            | ACAAACCCTA                                                                            | CAAAGCAATC                                                                            | TGATCGCTAT                                                                            |
| J138     | ACTAAAGTCA                                                                          | TAGAAAAAGT                                                                          | ACAAGCTCTT                                                                           | CCTAGTAAAA                                                                            | AACAACGCAT                                                                            | ACAAACCCTA                                                                            | CAAAGCAATC                                                                            | TGATCGCTAT                                                                            |
| TW183    | ACTAAAGTCA                                                                          | TAGAAAAAGT                                                                          | ACAAGCTCTT                                                                           | CCTAGTAAAA                                                                            | AACAACGCAT                                                                            | ACAAACCCTA                                                                            | CAAAGCAATC                                                                            | TGATCGCTAT                                                                            |
| TOR1     | ACTAAAGTCA                                                                          | TAGAAAAAGT                                                                          | ACAAGCTCTT                                                                           | CCTAGTAAAA                                                                            | AACAACGCAT                                                                            | ACAAACCCTA                                                                            | CAAAGCAATC                                                                            | TGATCGCTAT                                                                            |
| WA97001  | ACTAAAGTCA                                                                          | TAGAAAAAGT                                                                          | ACAAGCTCTT                                                                           | CCTAGTAAAA                                                                            | AACAACGCAT                                                                            | ACAAACCCTA                                                                            | CAAAGCAATC                                                                            | TGATCGCTAT                                                                            |
| 1979     | ACTAAAGTCA                                                                          | TAGAAAAAGT                                                                          | ACAAGCTCTT                                                                           | CCTAGTAAAA                                                                            | AACAACGCAT                                                                            | ACAAACCCTA                                                                            | CAAAGCAATC                                                                            | TGATCGCTAT                                                                            |
| SH511    | ACTAAAGTCA                                                                          | TAGAAAAAGT                                                                          | ACAAGCTCTT                                                                           | CCTAGTAAAA                                                                            | AACAACGCAT                                                                            | ACAAACCCTA                                                                            | CAAAGCAATC                                                                            | TGATCGCTAT                                                                            |
| Identity |    |    |    |    |    |    |    |    |
| B26      | TATACGCTGC                                                                          | TTTTGGTTTA                                                                          | CTGTTGAAAG                                                                           | CGGACTTATT                                                                            | GAAAACCATG                                                                            | AAGGAAGAAA                                                                            | AGCATATGGA                                                                            | GCCGTTCTTA                                                                            |
| LPCoLN   | TATACGCTGC                                                                          | TTTTGGTTTA                                                                          | CTGTTGAAAG                                                                           | CGGACTTATT                                                                            | GAAAACCATG                                                                            | AAGGAAGAAA                                                                            | AGCATATGGA                                                                            | GCCGTTCTTA                                                                            |
| AR39     | TGTACGCTGC                                                                          | TTTTGGTTTA                                                                          | CTGTTGAAAG                                                                           | CGGACTTATT                                                                            | GAAAACCATG                                                                            | AAGGAAGAAA                                                                            | AGCATATGGA                                                                            | GCCGTTCTTA                                                                            |
| CWL029   | TGTACGCTGC                                                                          | TTTTGGTTTA                                                                          | CTGTTGAAAG                                                                           | CGGACTTATT                                                                            | GAAAACCATG                                                                            | AAGGAAGAAA                                                                            | AGCATATGGA                                                                            | GCCGTTCTTA                                                                            |
| J138     | TGTACGCTGC                                                                          | TTTTGGTTTA                                                                          | CTGTTGAAAG                                                                           | CGGACTTATT                                                                            | GAAAACCATG                                                                            | AAGGAAGAAA                                                                            | AGCATATGGA                                                                            | GCCGTTCTTA                                                                            |
| TW183    | TGTACGCTGC                                                                          | TTTTGGTTTA                                                                          | CTGTTGAAAG                                                                           | CGGACTTATT                                                                            | GAAAACCATG                                                                            | AAGGAAGAAA                                                                            | AGCATATGGA                                                                            | GCCGTTCTTA                                                                            |
| TOR1     | TGTACGCTGC                                                                          | TTTTGGTTTA                                                                          | CTGTTGAAAG                                                                           | CGGACTTATT                                                                            | GAAAACCATG                                                                            | AAGGAAGAAA                                                                            | AGCATATGGA                                                                            | GCCGTTCTTA                                                                            |
| WA97001  | TGTACGCTGC                                                                          | TTTTGGTTTA                                                                          | CTGTTGAAAG                                                                           | CGGACTTATT                                                                            | GAAAACCATG                                                                            | AAGGAAGAAA                                                                            | AGCATATGGA                                                                            | GCCGTTCTTA                                                                            |
| 1979     | TGTACGCTGC                                                                          | TTTTGGTTTA                                                                          | CTGTTGAAAG                                                                           | CGGACTTATT                                                                            | GAAAACCATG                                                                            | AAGGAAGAAA                                                                            | AGCATATGGA                                                                            | GCCGTTCTTA                                                                            |
| SH511    | TGTACGCTGC                                                                          | TTTTGGTTTA                                                                          | CTGTTGAAAG                                                                           | CGGACTTATT                                                                            | GAAAACCATG                                                                            | AAGGAAGAAA                                                                            | AGCATATGGA                                                                            | GCCGTTCTTA                                                                            |
| Identity |  |  |  |  |  |  |  |  |
| B26      | TCAGTTCTCC                                                                          | TCAGGAAC TT                                                                         | AGACACGCTT                                                                           | TCATTGATAA                                                                            | CGTACGTGTT                                                                            | CTCCCTTTAG                                                                            | AATTGGATCA                                                                            | GATTATTCGT                                                                            |
| LPCoLN   | TCAGTTCTCC                                                                          | TCAGGAAC TT                                                                         | AGACACGCTT                                                                           | TCATTGATAA                                                                            | CGTACGTGTT                                                                            | CTCCCTTTAG                                                                            | AATTGGATCA                                                                            | GATTATTCGT                                                                            |
| AR39     | TCAGTTCTCC                                                                          | TCAGGAAC TT                                                                         | GGACACGCTT                                                                           | TCATTGATAA                                                                            | CGTACGTGTT                                                                            | CTCCCTTTAG                                                                            | AATTGGATCA                                                                            | GATTATTCGT                                                                            |
| CWL029   | TCAGTTCTCC                                                                          | TCAGGAAC TT                                                                         | GGACACGCTT                                                                           | TCATTGATAA                                                                            | CGTACGTGTT                                                                            | CTCCCTTTAG                                                                            | AATTGGATCA                                                                            | GATTATTCGT                                                                            |
| J138     | TCAGTTCTCC                                                                          | TCAGGAAC TT                                                                         | GGACACGCTT                                                                           | TCATTGATAA                                                                            | CGTACGTGTT                                                                            | CTCCCTTTAG                                                                            | AATTGGATCA                                                                            | GATTATTCGT                                                                            |
| TW183    | TCAGTTCTCC                                                                          | TCAGGAAC TT                                                                         | GGACACGCTT                                                                           | TCATTGATAA                                                                            | CGTACGTGTT                                                                            | CTCCCTTTAG                                                                            | AATTGGATCA                                                                            | GATTATTCGT                                                                            |
| TOR1     | TCAGTTCTCC                                                                          | TCAGGAAC TT                                                                         | GGACACGCTT                                                                           | TCATTGATAA                                                                            | CGTACGTGTT                                                                            | CTCCCTTTAG                                                                            | AATTGGATCA                                                                            | GATTATTCGT                                                                            |
| WA97001  | TCAGTTCTCC                                                                          | TCAGGAAC TT                                                                         | GGACACGCTT                                                                           | TCATTGATAA                                                                            | CGTACGTGTT                                                                            | CTCCCTTTAG                                                                            | AATTGGATCA                                                                            | GATTATTCGT                                                                            |
| 1979     | TCAGTTCTCC                                                                          | TCAGGAAC TT                                                                         | AGACACGCTT                                                                           | TCATTGATAA                                                                            | CGTACGTGTT                                                                            | CTCCCTTTAG                                                                            | AATTGGATCA                                                                            | GATTATTCGT                                                                            |
| SH511    | TCAGTTCTCC                                                                          | TCAGGAAC TT                                                                         | AGACACGCTT                                                                           | TCATTGATAA                                                                            | CGTACGTGTT                                                                            | CTCCCTTTAG                                                                            | AATTGGATCA                                                                            | GATTATTCGT                                                                            |
| Identity |  |  |  |  |  |  |  |  |
| B26      | CTTCCCTTCA                                                                          | ATACATCAAC                                                                          | TCCACAAGAG                                                                           | ACTTTATTTT                                                                            | CAATAAGACA                                                                            | TTTTGATGAA                                                                            | CTGGTAGAAC                                                                            | TCACTTCAA                                                                             |
| LPCoLN   | CTTCCCTTCA                                                                          | ATACATCAAC                                                                          | TCCACAAGAG                                                                           | ACTTTATTTT                                                                            | CAATAAGACA                                                                            | TTTTGATGAA                                                                            | CTGGTAGAAC                                                                            | TCACTTCAA                                                                             |
| AR39     | CTTCCCTTCA                                                                          | ATACATCAAC                                                                          | TCCACAAGAG                                                                           | ACTTTATTTT                                                                            | CAATAAGACA                                                                            | TTTTGATGAA                                                                            | CTGGTAGAAC                                                                            | TCACTTCAA                                                                             |
| CWL029   | CTTCCCTTCA                                                                          | ATACATCAAC                                                                          | TCCACAAGAG                                                                           | ACTTTATTTT                                                                            | CAATAAGACA                                                                            | TTTTGATGAA                                                                            | CTGGTAGAAC                                                                            | TCACTTCAA                                                                             |
| J138     | CTTCCCTTCA                                                                          | ATACATCAAC                                                                          | TCCACAAGAG                                                                           | ACTTTATTTT                                                                            | CAATAAGACA                                                                            | TTTTGATGAA                                                                            | CTGGTAGAAC                                                                            | TCACTTCAA                                                                             |
| TW183    | CTTCCCTTCA                                                                          | ATACATCAAC                                                                          | TCCACAAGAG                                                                           | ACTTTATTTT                                                                            | CAATAAGACA                                                                            | TTTTGATGAA                                                                            | CTGGTAGAAC                                                                            | TCACTTCAA                                                                             |
| TOR1     | CTTCCCTTCA                                                                          | ATACATCAAC                                                                          | TCCACAAGAG                                                                           | ACTTTATTTT                                                                            | CAATAAGACA                                                                            | TTTTGATGAA                                                                            | CTGGTAGAAC                                                                            | TCACTTCAA                                                                             |
| WA97001  | CTTCCCTTCA                                                                          | ATACATCAAC                                                                          | TCCACAAGAG                                                                           | ACTTTATTTT                                                                            | CAATAAGACA                                                                            | TTTTGATGAA                                                                            | CTGGTAGAAC                                                                            | TCACTTCAA                                                                             |
| 1979     | CTTCCCTTCA                                                                          | ATACATCAAC                                                                          | TCCACAAGAG                                                                           | ACTTTATTTT                                                                            | CAATAAGACA                                                                            | TTTTGATGAA                                                                            | CTGGTAGAAC                                                                            | TCACTTCAA                                                                             |
| SH511    | CTTCCCTTCA                                                                          | ATACATCAAC                                                                          | TCCACAAGAG                                                                           | ACTTTATTTT                                                                            | CAATAAGACA                                                                            | TTTTGATGAA                                                                            | CTGGTAGAAC                                                                            | TCACTTCAA                                                                             |

| Identity | 970        | 980        | 990         | 1,000      | 1,010      | 1,020      | 1,030      | 1,039     |
|----------|------------|------------|-------------|------------|------------|------------|------------|-----------|
| B26      | ATTAGAATGG | ATGCTCGACC | AAGGTC TGTT | AGAATCAATT | CCCCTTTACA | ATCAAGAGAA | ATATCTTTCT | GGTTTTGAG |
| LPCoLN   | ATTAGAATGG | ATGCTCGACC | AAGGTC TGTT | AGAATCAATT | CCCCTTTACA | ATCAAGAGAA | ATATCTTTCT | GGTTTTGAG |
| AR39     | ATTAGAATGG | ATGCTCGACC | AAGGTC TGTT | AGAATCAATT | CCCCTTTACA | ATCAAGAGAA | ATATCTTTCT | GGTTTTGAG |
| CWL029   | ATTAGAATGG | ATGCTCGACC | AAGGTC TGTT | AGAATCAATT | CCCCTTTACA | ATCAAGAGAA | ATATCTTTCT | GGTTTTGAG |
| J138     | ATTAGAATGG | ATGCTCGACC | AAGGTC TGTT | AGAATCAATT | CCCCTTTACA | ATCAAGAGAA | ATATCTTTCT | GGTTTTGAG |
| TW183    | ATTAGAATGG | ATGCTCGACC | AAGGTC TGTT | AGAATCAATT | CCCCTTTACA | ATCAAGAGAA | ATATCTTTCT | GGTTTTGAG |
| TOR1     | ATTAGAATGG | ATGCTCGACC | AAGGTC TGTT | AGAATCAATT | CCCCTTTACA | ATCAAGAGAA | ATATCTTTCT | GGTTTTGAG |
| WA97001  | ATTAGAATGG | ATGCTCGACC | AAGGTC TGTT | AGAATCAATT | CCCCTTTACA | ATCAAGAGAA | ATATCTTTCT | GGTTTTGAG |
| 1979     | ATTAGAATGG | ATGCTCGACC | AAGGTC TGTT | AGAATCAATT | CCCCTTTACA | ATCAAGAGAA | ATATCTTTCT | GGTTTTGAG |
| SH511    | ATTAGAATGG | ATGCTCGACC | AAGGTC TGTT | AGAATCAATT | CCCCTTTACA | ATCAAGAGAA | ATATCTTTCT | GGTTTTGAG |

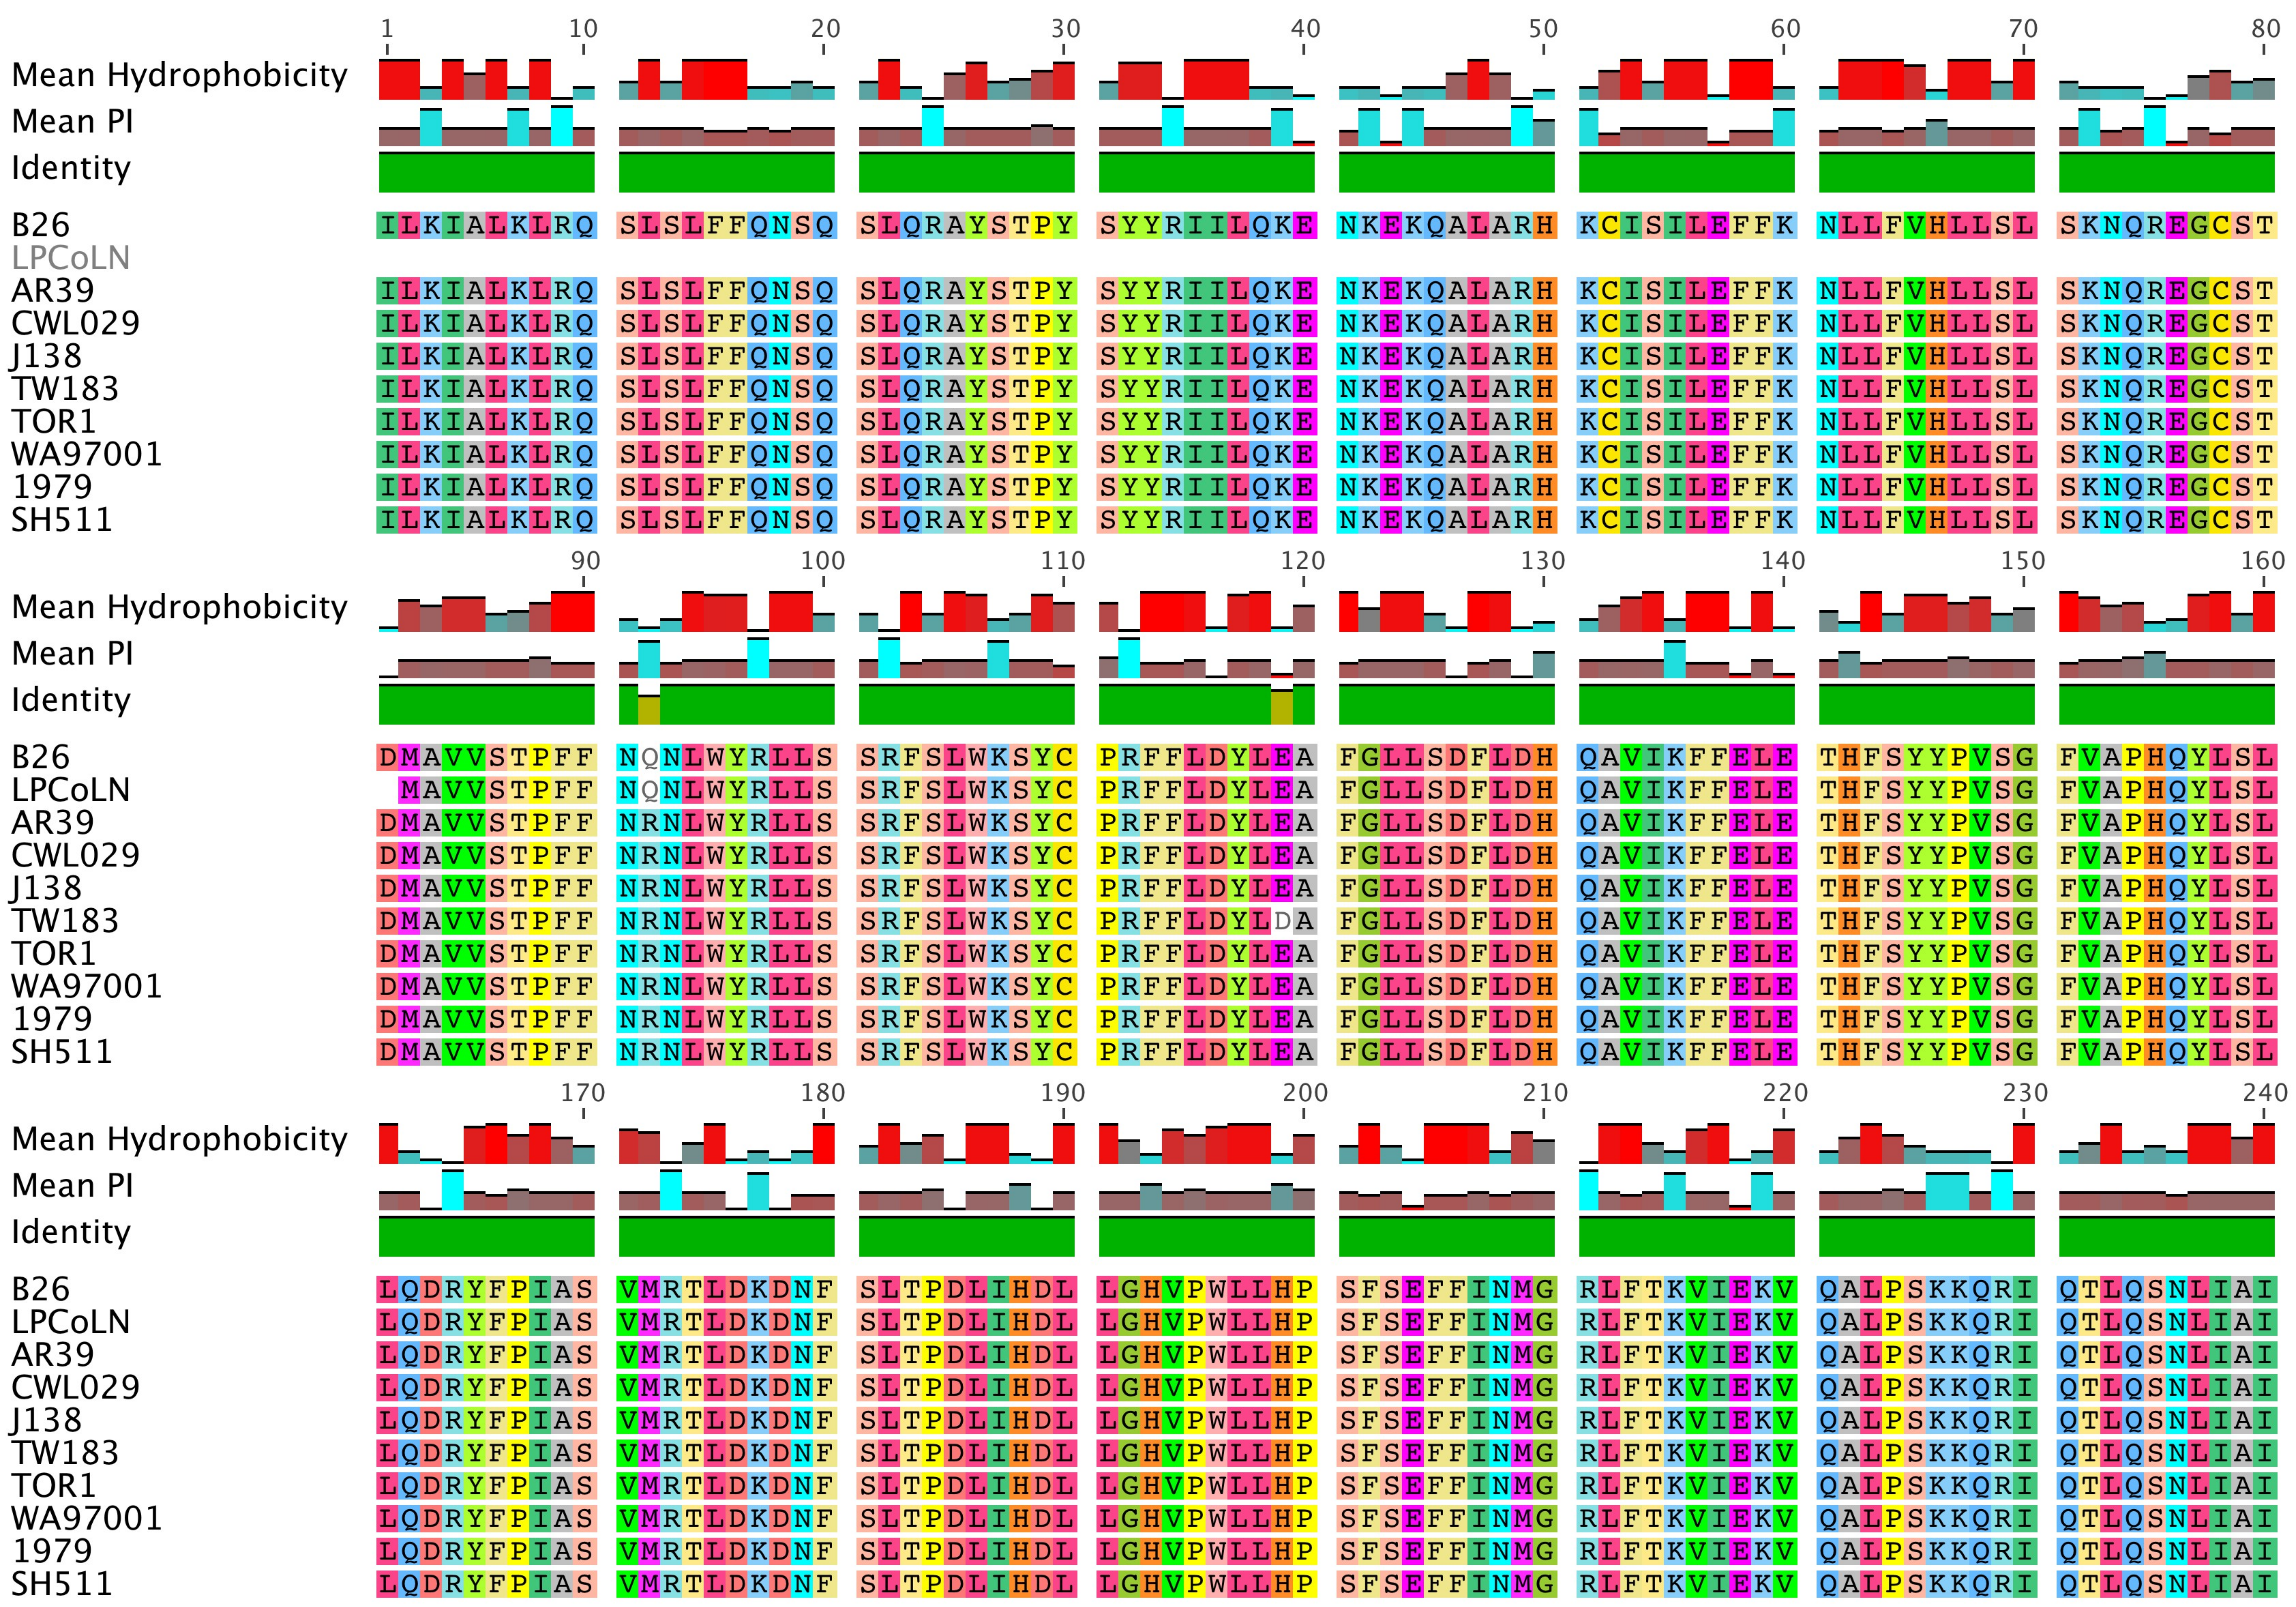

Supplement: ppat.1000903.s004.pdf [file ppat.1000903.s004.pdf]
