# Supplementary material for: Chlamydia pneumoniae Is Genetically Diverse in Animals and Appears to Have Crossed the Host Barrier to Humans on (At Least) Two Occasions
Source: PubMed Central journal article supplement (PMC2873915; doi:10.1371/journal.ppat.1000903), 2010-05-20

Identity 1 10 20 30 40 50

B26 ATGACTCCTG CAGTGTATAG TGTACAAACG AACTCCTTG AAAAGTTGTC  
 LPCoLN ATGACTCCTG CAGTGTATAG TGTACAAACG AACTCCTTG AAAAGTTGTC  
 DE177 ATGACTCCTG CAGTGTATAG TGTACAAACG GACTCCCTTG AAAAGTTGTC  
 AR39 ATGACTCCTG CAGTGTATAG TTTACAAACG GACTCCCTTG AAAAGTTGTC  
 CWL029 ATGACTCCTG CAGTGTATAG TTTACAAACG GACTCCCTTG AAAAGTTGTC  
 J138 ATGACTCCTG CAGTGTATAG TTTACAAACG GACTCCCTTG AAAAGTTGTC  
 TW183 ATGACTCCTG CAGTGTATAG TTTACAAACG GACTCCCTTG AAAAGTTGTC  
 TOR1 ATGACTCCTG CAGTGTATAG TTTACAAACG GACTCCCTTG AAAAGTTGTC  
 WA97001 ATGACTCCTG CAGTGTATAG TTTACAAACG GACTCCCTTG AAAAGTTGTC  
 1979 ATGACTCCTG CAGTGTATAG TGTACAAACG GACTCCCTTG AAAAGTTGTC  
 SH511 ATGACTCCTG CAGTGTATAG TGTACAAACG GACTCCCTTG AAAAGTTGTC

Identity 60 70 80 90 100

B26 TTTGGAGAGG GATGAAGAGT TCGTACGAG CTTTCCTCTC TTAGACTCTC  
 LPCoLN TTTGGAGAGG GATGAAGAGT TCGTACGAG CTTTCCTCTC TTAGACTCTC  
 DE177 TTTAGAGAGG GATGAAGAGT TTCGTACGAG CTTTCCTCTC TTAGACTCTC  
 AR39 TTTAGAGAGG GATGAAGAGT TTCGTACGAG CTTTCCTCTC TTAGACTCTC  
 CWL029 TTTAGAGAGG GATGAAGAGT TTCGTACGAG CTTTCCTCTC TTAGACTCTC  
 J138 TTTAGAGAGG GATGAAGAGT TTCGTACGAG CTTTCCTCTC TTAGACTCTC  
 TW183 TTTAGAGAGG GATGAAGAGT TTCGTACGAG CTTTCCTCTC TTAGACTCTC  
 TOR1 TTTAGAGAGG GATGAAGAGT TTCGTACGAG CTTTCCTCTC TTAGACTCTC  
 WA97001 TTTAGAGAGG GATGAAGAGT TTCGTACGAG CTTTCCTCTC TTAGACTCTC  
 1979 TTTAGAGAGG GATGAAGAGT TTCGTACGAG CTTTCCTCTC TTAGACTCTC  
 SH511 TTTAGAGAGG GATGAAGAGT TTCGTACGAG CTTTCCTCTC TTAGACTCTC

Identity 110 120 130 140 150

B26 TCTCCACCT TACAGGATTT TCTCCAAATA CTACFTTGT TGGAAATAGA  
 LPCoLN TCTCCACCT TACAGGATTT TCTCCAAATA CTACFTTGT TGGAAATAGA  
 DE177 TCTCCACTCT TACAGGATTT TCTCCAAATA CTACFTTGT TGGAAATAGA  
 AR39 TCTCCACTCT TACAGGATTT TCTCCAAATA CTACFTTGT TGGAAATAGA  
 CWL029 TCTCCACTCT TACAGGATTT TCTCCAAATA CTACFTTGT TGGAAATAGA  
 J138 TCTCCACTCT TACAGGATTT TCTCCAAATA CTACFTTGT TGGAAATAGA  
 TW183 TCTCCACTCT TACAGGATTT TCTCCAAATA CTACFTTGT TGGAAATAGA  
 TOR1 TCTCCACTCT TACAGGATTT TCTCCAAATA CTACFTTGT TGGAAATAGA  
 WA97001 TCTCCACTCT TACAGGATTT TCTCCAAATA CTACFTTGT TGGAAATAGA  
 1979 TCTCCACTCT TACAGGATTT TCTCCAAATA CTACFTTGT TGGAAATAGA  
 SH511 TCTCCACTCT TACAGGATTT TCTCCAAATA CTACFTTGT TGGAAATAGA

Identity 160 170 180 190 200

B26 CATAATTCC CTCAAGAT TGTACTTTCT AACTACAAGT CTATTGATAA  
 LPCoLN CATAATTCC CTCAAGAT TGTACTTTCT AACTACAAGT CTATTGATAA  
 DE177 CATAATTCC CTCAAGACAT TGTACTTTCT AACTACAAGT CTATTGATAA  
 AR39 CATAATTCC CTCAAGACAT TGTACTTTCT AACTACAAGT CTATTGATAA  
 CWL029 CATAATTCC CTCAAGACAT TGTACTTTCT AACTACAAGT CTATTGATAA  
 J138 CATAATTCC CTCAAGACAT TGTACTTTCT AACTACAAGT CTATTGATAA  
 TW183 CATAATTCC CTCAAGACAT TGTACTTTCT AACTACAAGT CTATTGATAA  
 TOR1 CATAATTCC CTCAAGACAT TGTACTTTCT AACTACAAGT CTATTGATAA  
 WA97001 CATAATTCC CTCAAGACAT TGTACTTTCT AACTACAAGT CTATTGATAA  
 1979 CATAATTCC CTCAAGACAT TGTACTTTCT AACTACAAGT CTATTGATAA  
 SH511 CATAATTCC CTCAAGACAT TGTACTTTCT AACTACAAGT CTATTGATAA

Identity 210 220 230 240 250

B26 CATCCTTCTT CTTTGGACAT CGGCTGGGGG AGCTGTGTC TGTAATAATT  
 LPCoLN CATCCTTCTT CTTTGGACAT CGGCTGGGGG AGCTGTGTC TGTAATAATT  
 DE177 CATCCTTCTT CTTTGGACAT CGGCTGGGGG AGCTGTGTC TGTAATAATT  
 AR39 CATCCTTCTT CTTTGGACAT CGGCTGGGGG AGCTGTGTC TGTAATAATT  
 CWL029 CATCCTTCTT CTTTGGACAT CGGCTGGGGG AGCTGTGTC TGTAATAATT  
 J138 CATCCTTCTT CTTTGGACAT CGGCTGGGGG AGCTGTGTC TGTAATAATT  
 TW183 CATCCTTCTT CTTTGGACAT CGGCTGGGGG AGCTGTGTC TGTAATAATT  
 TOR1 CATCCTTCTT CTTTGGACAT CGGCTGGGGG AGCTGTGTC TGTAATAATT  
 WA97001 CATCCTTCTT CTTTGGACAT CGGCTGGGGG AGCTGTGTC TGTAATAATT  
 1979 CATCCTTCTT CTTTGGACAT CGGCTGGGGG AGCTGTGTC TGTAATAATT  
 SH511 CATCCTTCTT CTTTGGACAT CGGCTGGGGG AGCTGTGTC TGTAATAATT

| Identity | 260                   | 270                 | 280         | 290         | 300        |
|----------|-----------------------|---------------------|-------------|-------------|------------|
| B26      | TC <b>C</b> TA TTA TC | AAATG TTTGAA        | GACCA TGCCT | TCTTCAG TAA | AAATCTCGCG |
| LPCoLN   | TC <b>C</b> TA TTA TC | AAATG TTTGAA        | GACCA TGCCT | TCTTCAG TAA | AAATCTCGCG |
| DE177    | TCTTA TTA TC          | AAAT <b>C</b> TTGAA | GACCA TGCCT | TCTTCAG TAA | AAATCTCGCG |
| AR39     | TCTTA TTA TC          | AAATG TTTGAA        | GACCA TGCCT | TCTTCAG TAA | AAATCTCGCG |
| CWL029   | TCTTA TTA TC          | AAATG TTTGAA        | GACCA TGCCT | TCTTCAG TAA | AAATCTCGCG |
| J138     | TCTTA TTA TC          | AAATG TTTGAA        | GACCA TGCCT | TCTTCAG TAA | AAATCTCGCG |
| TW183    | TCTTA TTA TC          | AAATG TTTGAA        | GACCA TGCCT | TCTTCAG TAA | AAATCTCGCG |
| TOR1     | TCTTA TTA TC          | AAATG TTTGAA        | GACCA TGCCT | TCTTCAG TAA | AAATCTCGCG |
| WA97001  | TCTTA TTA TC          | AAATG TTTGAA        | GACCA TGCCT | TCTTCAG TAA | AAATCTCGCG |
| 1979     | TCTTA TTA TC          | AAATG TTTGAA        | GACCA TGCCT | TCTTCAG TAA | AAATCTCGCG |
| SH511    | TCTTA TTA TC          | AAATG TTTGAA        | GACCA TGCCT | TCTTCAG TAA | AAATCTCGCG |

| Identity | 310         | 320                | 330        | 340        | 350        |
|----------|-------------|--------------------|------------|------------|------------|
| B26      | A TTGGGACTG | GAGGCGCGAT         | TGCTTGCCAG | GGAGCCTGCA | CAATCACGAA |
| LPCoLN   | A TTGGGACTG | GAGGCGCGAT         | TGCTTGCCAG | GGAGCCTGCA | CAATCACGAA |
| DE177    | A TTGGGACTG | GAGGCGCGAT         | TGCTTGCCAG | GGAGCCTGCA | CAATCACGAA |
| AR39     | A TTGGGACTG | GAGGCGCGAT         | TGCTTGCCAG | GGAGCCTGCA | CAATCACGAA |
| CWL029   | A TTGGGACTG | GAGGCGCGAT         | TGCTTGCCAG | GGAGCCTGCA | CAATCACGAA |
| J138     | A TTGGGACTG | <b>C</b> AGGCGCGAT | TGCTTGCCAG | GGAGCCTGCA | CAATCACGAA |
| TW183    | A TTGGGACTG | <b>C</b> AGGCGCGAT | TGCTTGCCAG | GGAGCCTGCA | CAATCACGAA |
| TOR1     | A TTGGGACTG | GAGGCGCGAT         | TGCTTGCCAG | GGAGCCTGCA | CAATCACGAA |
| WA97001  | A TTGGGACTG | GAGGCGCGAT         | TGCTTGCCAG | GGAGCCTGCA | CAATCACGAA |
| 1979     | A TTGGGACTG | GAGGCGCGAT         | TGCTTGCCAG | GGAGCCTGCA | CAATCACGAA |
| SH511    | A TTGGGACTG | GAGGCGCGAT         | TGCTTGCCAG | GGAGCCTGCA | CAATCACGAA |

| Identity | 360         | 370                  | 380         | 390                 | 400                 |
|----------|-------------|----------------------|-------------|---------------------|---------------------|
| B26      | GAA TAGAGGA | CC <b>T</b> CTTA TTT | TTTTTCAGCAA | TCGAGG <b>C</b> CTT | AACAA TGCA <b>A</b> |
| LPCoLN   | GAA TAGAGGA | CC <b>T</b> CTTA TTT | TTTTTCAGCAA | TCGAGG <b>C</b> CTT | AACAA TGCA <b>A</b> |
| DE177    | GAA TAGAGGA | CCCCTTA TTT          | TTTTTCAGCAA | TCGAGG TCTT         | AACAA TGCGA         |
| AR39     | GAA TAGAGGA | CCCCTTA TTT          | TTTTTCAGCAA | TCGAGG TCTT         | AACAA TGCGA         |
| CWL029   | GAA TAGAGGA | CCCCTTA TTT          | TTTTTCAGCAA | TCGAGG TCTT         | AACAA TGCGA         |
| J138     | GAA TAGAGGA | CCCCTTA TTT          | TTTTTCAGCAA | TCGAGG TCTT         | AACAA TGCGA         |
| TW183    | GAA TAGAGGA | CCCCTTA TTT          | TTTTTCAGCAA | TCGAGG TCTT         | AACAA TGCGA         |
| TOR1     | GAA TAGAGGA | CCCCTTA TTT          | TTTTTCAGCAA | TCGAGG TCTT         | AACAA TGCGA         |
| WA97001  | GAA TAGAGGA | CCCCTTA TTT          | TTTTTCAGCAA | TCGAGG TCTT         | AACAA TGCGA         |
| 1979     | GAA TAGAGGA | CCCCTTA TTT          | TTTTTCAGCAA | TCGAGG TCTT         | AACAA TGCGA         |
| SH511    | GAA TAGAGGA | CCCCTTA TTT          | TTTTTCAGCAA | TCGAGG TCTT         | AACAA TGCGA         |



Identity 

|         | 660        | 670                 | 680         | 690                  | 700                                  |
|---------|------------|---------------------|-------------|----------------------|--------------------------------------|
| B26     | TTTTAAGAAC | AACTGTG <b>C</b> GA | ACAA TGGCGG | GGC <b>T</b> AATTCAA | ACAA <b>A</b> C <b>A</b> GC <b>A</b> |
| LPCoLN  | TTTTAAGAAC | AACTGTG <b>C</b> GA | ACAA TGGCGG | GGC <b>T</b> AATTCAA | ACAA <b>A</b> C <b>A</b> GC <b>A</b> |
| DE177   | TTTTAAGAAC | AACTGTGGGA          | ACAA TGGCGG | GGCCATTCAA           | ACAAGCGTTA                           |
| AR39    | TTTTAAGAAC | AACTGTGGGA          | ACAA TGGCGG | GGCCATTCAA           | ACAAGCGTTA                           |
| CWL029  | TTTTAAGAAC | AACTGTGGGA          | ACAA TGGCGG | GGCCATTCAA           | ACAAGCGTTA                           |
| J138    | TTTTAAGAAC | AACTGTGGGA          | ACAA TGGCGG | GGCCATTCAA           | ACAAGCGTTA                           |
| TW183   | TTTTAAGAAC | AACTGTGGGA          | ACAA TGGCGG | GGCCATTCAA           | ACAAGCGTTA                           |
| TOR1    | TTTTAAGAAC | AACTGTGGGA          | ACAA TGGCGG | GGCCATTCAA           | ACAAGCGTTA                           |
| WA97001 | TTTTAAGAAC | AACTGTGGGA          | ACAA TGGCGG | GGCCATTCAA           | ACAAGCGTTA                           |
| 1979    | TTTTAAGAAC | AACTGTGGGA          | ACAA TGGCGG | GGCCATTCAA           | ACAAGCGTTA                           |
| SH511   | TTTTAAGAAC | AACTGTGGGA          | ACAA TGGCGG | GGCCATTCAA           | ACAAGCGTTA                           |

Identity 

|         | 710                                          | 720         | 730                                           | 740        | 750         |
|---------|----------------------------------------------|-------------|-----------------------------------------------|------------|-------------|
| B26     | <b>C</b> <b>C</b> A <b>T</b> T <b>A</b> CGAT | AAAAAA TAAC | T <b>C</b> TGG <b>A</b> T <b>C</b> A <b>G</b> | TGATTTTCAA | TAA CAACACA |
| LPCoLN  | <b>C</b> <b>C</b> A <b>T</b> T <b>A</b> CGAT | AAAAAA TAAC | T <b>C</b> TGG <b>A</b> T <b>C</b> A <b>G</b> | TGATTTTCAA | TAA CAACACA |
| DE177   | CTGTTGCGAT                                   | AAAAAA TAAC | TCCGGGTCGG                                    | TGATTTTCAA | TAA CAACACA |
| AR39    | CTGTTGCGAT                                   | AAAAAA TAAC | TCCGGGTCGG                                    | TGATTTTCAA | TAA CAACACA |
| CWL029  | CTGTTGCGAT                                   | AAAAAA TAAC | TCCGGGTCGG                                    | TGATTTTCAA | TAA CAACACA |
| J138    | CTGTTGCGAT                                   | AAAAAA TAAC | TCCGGGTCGG                                    | TGATTTTCAA | TAA CAACACA |
| TW183   | CTGTTGCGAT                                   | AAAAAA TAAC | TCCGGGTCGG                                    | TGATTTTCAA | TAA CAACACA |
| TOR1    | CTGTTGCGAT                                   | AAAAAA TAAC | TCCGGGTCGG                                    | TGATTTTCAA | TAA CAACACA |
| WA97001 | CTGTTGCGAT                                   | AAAAAA TAAC | TCCGGGTCGG                                    | TGATTTTCAA | TAA CAACACA |
| 1979    | CTGTTGCGAT                                   | AAAAAA TAAC | TCCGGGTCGG                                    | TGATTTTCAA | TAA CAACACA |
| SH511   | CTGTTGCGAT                                   | AAAAAA TAAC | TCCGGGTCGG                                    | TGATTTTCAA | TAA CAACACA |

Identity 

|         | 760                         | 770                                          | 780        | 790        | 800        |
|---------|-----------------------------|----------------------------------------------|------------|------------|------------|
| B26     | G <b>C</b> <b>A</b> TTATCTG | <b>C</b> TT <b>C</b> CA <b>T</b> AG <b>A</b> | TTCAGGAAAT | GGTTCAGGAG | GGGCGATTTA |
| LPCoLN  | G <b>C</b> <b>A</b> TTATCTG | <b>C</b> TT <b>C</b> CA <b>T</b> AG <b>A</b> | TTCAGGAAAT | GGTTCAGGAG | GGGCGATTTA |
| DE177   | G <b>C</b> <b>A</b> TTATCTG | GTTTCGATAAA                                  | TTCAGGAAAT | GGTTCAGGAG | GGGCGATTTA |
| AR39    | GCGTTATCTG                  | GTTTCGATAAA                                  | TTCAGGAAAT | GGTTCAGGAG | GGGCGATTTA |
| CWL029  | GCGTTATCTG                  | GTTTCGATAAA                                  | TTCAGGAAAT | GGTTCAGGAG | GGGCGATTTA |
| J138    | GCGTTATCTG                  | GTTTCGATAAA                                  | TTCAGGAAAT | GGTTCAGGAG | GGGCGATTTA |
| TW183   | GCGTTATCTG                  | GTTTCGATAAA                                  | TTCAGGAAAT | GGTTCAGGAG | GGGCGATTTA |
| TOR1    | GCGTTATCTG                  | GTTTCGATAAA                                  | TTCAGGAAAT | GGTTCAGGAG | GGGCGATTTA |
| WA97001 | GCGTTATCTG                  | GTTTCGATAAA                                  | TTCAGGAAAT | GGTTCAGGAG | GGGCGATTTA |
| 1979    | GCGTTATCTG                  | GTTTCGATAAA                                  | TTCAGGAAAT | GGTTCAGGAG | GGGCGATTTA |
| SH511   | GCGTTATCTG                  | GTTTCGATAAA                                  | TTCAGGAAAT | GGTTCAGGAG | GGGCGATTTA |

Identity 

|         | 810                  | 820        | 830        | 840        | 850                |
|---------|----------------------|------------|------------|------------|--------------------|
| B26     | TACAACAAG <b>G</b> C | CTATCCATAG | ACGATAAACC | TGGAACTATT | <b>A</b> TTTTCAATA |
| LPCoLN  | TACAACAAG <b>G</b> C | CTATCCATAG | ACGATAAACC | TGGAACTATT | <b>A</b> TTTTCAATA |
| DE177   | TACAACAAGC           | CTATCCATAG | ACGATAAACC | TGGAACTATT | CTTTTCAATA         |
| AR39    | TACAACAAGC           | CTATCCATAG | ACGATAAACC | TGGAACTATT | CTTTTCAATA         |
| CWL029  | TACAACAAGC           | CTATCCATAG | ACGATAAACC | TGGAACTATT | CTTTTCAATA         |
| J138    | TACAACAAGC           | CTATCCATAG | ACGATAAACC | TGGAACTATT | CTTTTCAATA         |
| TW183   | TACAACAAGC           | CTATCCATAG | ACGATAAACC | TGGAACTATT | CTTTTCAATA         |
| TOR1    | TACAACAAGC           | CTATCCATAG | ACGATAAACC | TGGAACTATT | CTTTTCAATA         |
| WA97001 | TACAACAAGC           | CTATCCATAG | ACGATAAACC | TGGAACTATT | CTTTTCAATA         |
| 1979    | TACAACAAGC           | CTATCCATAG | ACGATAAACC | TGGAACTATT | CTTTTCAATA         |
| SH511   | TACAACAAGC           | CTATCCATAG | ACGATAAACC | TGGAACTATT | CTTTTCAATA         |



Identity 

|         | 1,140         | 1,120       | 1,130       | 1,140       | 1,150       |
|---------|---------------|-------------|-------------|-------------|-------------|
| B26     | TAA TAAGGGG A | TATA CGACTG | CTTT TTTTGA | TCCT ATAGAA | CACCAA CA C |
| LPCoLN  | TAA TAAGGGG A | TATA CGACTG | CTTT TTTTGA | TCCT ATAGAA | CACCAA CA C |
| DE177   | TAA TAAGGGG   | TATA CGACTG | CTTT TTTTGA | TCCT ATAGAA | CACCAA CATC |
| AR39    | TAA TAAGGGG   | TATA CGACTG | CTTT TTTTGA | TCCT ATAGAA | CACCAA CATC |
| CWL029  | TAA TAAGGGG   | TATA CGACTG | CTTT TTTTGA | TCCT ATAGAA | CACCAA CATC |
| J138    | TAA TAAGGGG   | TATA CGACTG | CTTT TTTTGA | TCCT ATAGAA | CACCAA CATC |
| TW183   | TAA TAAGGGG   | TATA CGACTG | CTTT TTTTGA | TCCT ATAGAA | CACCAA CATC |
| TOR1    | TAA TAAGGGG   | TATA CGACTG | CTTT TTTTGA | TCCT ATAGAA | CACCAA CATC |
| WA97001 | TAA TAAGGGG   | TATA CGACTG | CTTT TTTTGA | TCCT ATAGAA | CACCAA CATC |
| 1979    | TAA TAAGGGG   | TATA CGACTG | CTTT TTTTGA | TCCT ATAGAA | CACCAA CATC |
| SH511   | TAA TAAGGGG   | TATA CGACTG | CTTT TTTTGA | TCCT ATAGAA | CACCAA CATC |

Identity 

|         | 1,160      | 1,170      | 1,180      | 1,190      | 1,200       |
|---------|------------|------------|------------|------------|-------------|
| B26     | CAACTACAAA | TCCTCTAATC | TTTAATCCCA | ATGCGAACCA | TCAGGGAAACG |
| LPCoLN  | CAACTACAAA | TCCTCTAATC | TTTAATCCCA | ATGCGAACCA | TCAGGGAAACG |
| DE177   | CAACTACAAA | TCCTCTAATC | TTTAATCCCA | ATGCGAACCA | TCAGGGAAACG |
| AR39    | CAACTACAAA | TCCTCTAATC | TTTAATCCCA | ATGCGAACCA | TCAGGGAAACG |
| CWL029  | CAACTACAAA | TCCTCTAATC | TTTAATCCCA | ATGCGAACCA | TCAGGGAAACG |
| J138    | CAACTACAAA | TCCTCTAATC | TTTAATCCCA | ATGCGAACCA | TCAGGGAAACG |
| TW183   | CAACTACAAA | TCCTCTAATC | TTTAATCCCA | ATGCGAACCA | TCAGGGAAACG |
| TOR1    | CAACTACAAA | TCCTCTAATC | TTTAATCCCA | ATGCGAACCA | TCAGGGAAACG |
| WA97001 | CAACTACAAA | TCCTCTAATC | TTTAATCCCA | ATGCGAACCA | TCAGGGAAACG |
| 1979    | CAACTACAAA | TCCTCTAATC | TTTAATCCCA | ATGCGAACCA | TCAGGGAAACG |
| SH511   | CAACTACAAA | TCCTCTAATC | TTTAATCCCA | ATGCGAACCA | TCAGGGAAACG |

Identity 

|         | 1,210      | 1,220      | 1,230      | 1,240      | 1,250       |
|---------|------------|------------|------------|------------|-------------|
| B26     | ATCTTATTTT | CTTCAGCCTA | TATCCCAGAA | GCTTCTGACT | ACGAAAA CAA |
| LPCoLN  | ATCTTATTTT | CTTCAGCCTA | TATCCCAGAA | GCTTCTGACT | ACGAAAA CAA |
| DE177   | ATCTTATTTT | CTTCAGCCTA | TATCCCAGAA | GCTTCTGACT | ACGAAAA TAA |
| AR39    | ATCTTATTTT | CTTCAGCCTA | TATCCCAGAA | GCTTCTGACT | ACGAAAA TAA |
| CWL029  | ATCTTATTTT | CTTCAGCCTA | TATCCCAGAA | GCTTCTGACT | ACGAAAA TAA |
| J138    | ATCTTATTTT | CTTCAGCCTA | TATCCCAGAA | GCTTCTGACT | ACGAAAA TAA |
| TW183   | ATCTTATTTT | CTTCAGCCTA | TATCCCAGAA | GCTTCTGACT | ACGAAAA TAA |
| TOR1    | ATCTTATTTT | CTTCAGCCTA | TATCCCAGAA | GCTTCTGACT | ACGAAAA TAA |
| WA97001 | ATCTTATTTT | CTTCAGCCTA | TATCCCAGAA | GCTTCTGACT | ACGAAAA TAA |
| 1979    | ATCTTATTTT | CTTCAGCCTA | TATCCCAGAA | GCTTCTGACT | ACGAAAA TAA |
| SH511   | ATCTTATTTT | CTTCAGCCTA | TATCCCAGAA | GCTTCTGACT | ACGAAAA TAA |

Identity 

|         | 1,260       | 1,270       | 1,280      | 1,290      | 1,300     |
|---------|-------------|-------------|------------|------------|-----------|
| B26     | TTTCAATTAGC | AGCTCGAAAA  | ATACCTCTGA | ACTTCGCAAT | GGTGTCTCT |
| LPCoLN  | TTTCAATTAGC | AGCTCGAAAA  | ATACCTCTGA | ACTTCGCAAT | GGTGTCTCT |
| DE177   | TTTCAATTAGC | AGCTCGAAAA  | ATACCTCTGA | ACTTCGCAAT | GGTGTCTCT |
| AR39    | TTTCAATTAGC | AGCTCGAAAA  | ATACCTCTGA | ACTTCGCAAT | GGTGTCTCT |
| CWL029  | TTTCAATTAGC | AGCTCGAAAA  | ATACCTCTGA | ACTTCGCAAT | GGTGTCTCT |
| J138    | TTTCAATTAGC | AGCTCGAAAA  | ATACCTCTGA | ACTTCGCAAT | GGTGTCTCT |
| TW183   | TTTCAATTAGC | AGCTCGAAAA  | ATACCTCTGA | ACTTCGCAAT | GGTGTCTCT |
| TOR1    | TTTCAATTAGC | AGCTCGAAAA  | ATACCTCTGA | ACTTCGCAAT | GGTGTCTCT |
| WA97001 | TTTCAATTAGC | AGCTCGAAAA  | ATACCTCTGA | ACTTCGCAAT | GGTGTCTCT |
| 1979    | TTTCAATTAGC | AGCTCGA GAA | ATACCTCTGA | ACTTCGCAAT | GGTGTCTCT |
| SH511   | TTTCAATTAGC | AGCTCGA GAA | ATACCTCTGA | ACTTCGCAAT | GGTGTCTCT |

| Identity | 1,310      | 1,320                | 1,330      | 1,340      | 1,350      |
|----------|------------|----------------------|------------|------------|------------|
| B26      | CTATCGAGGA | TCGTGCGGGA           | TGGCAATTCT | ATAAGTTCAC | TCAAAAAGGA |
| LPCoLN   | CTATCGAGGA | TCGTGCGGGA           | TGGCAATTCT | ATAAGTTCAC | TCAAAAAGGA |
| DE177    | CTATCGAGGA | TCG <b>R</b> TGCGGGA | TGGCAATTCT | ATAAGTTCAC | TCAAAAAGGA |
| AR39     | CTATCGAGGA | TCGTGCGGGA           | TGGCAATTCT | ATAAGTTCAC | TCAAAAAGGA |
| CWL029   | CTATCGAGGA | TCGTGCGGGA           | TGGCAATTCT | ATAAGTTCAC | TCAAAAAGGA |
| J138     | CTATCGAGGA | TCGTGCGGGA           | TGGCAATTCT | ATAAGTTCAC | TCAAAAAGGA |
| TW183    | CTATCGAGGA | TCGTGCGGGA           | TGGCAATTCT | ATAAGTTCAC | TCAAAAAGGA |
| TOR1     | CTATCGAGGA | TCGTGCGGGA           | TGGCAATTCT | ATAAGTTCAC | TCAAAAAGGA |
| WA97001  | CTATCGAGGA | TCGTGCGGGA           | TGGCAATTCT | ATAAGTTCAC | TCAAAAAGGA |
| 1979     | CTATCGAGGA | TCGTGCGGGA           | TGGCAATTCT | ATAAGTTCAC | TCAAAAAGGA |
| SH511    | CTATCGAGGA | TCGTGCGGGA           | TGGCAATTCT | ATAAGTTCAC | TCAAAAAGGA |

| Identity | 1,360      | 1,370      | 1,380      | 1,390      | 1,400      |
|----------|------------|------------|------------|------------|------------|
| B26      | GGTATCCTTA | AATTAGGGCA | TGCGGCGAGT | ATTGCAACAA | CTGCCAACTC |
| LPCoLN   | GGTATCCTTA | AATTAGGGCA | TGCGGCGAGT | ATTGCAACAA | CTGCCAACTC |
| DE177    | GGTATCCTTA | AATTAGGGCA | TGCGGCGAGT | ATTGCAACAA | CTGCCAACTC |
| AR39     | GGTATCCTTA | AATTAGGGCA | TGCGGCGAGT | ATTGCAACAA | CTGCCAACTC |
| CWL029   | GGTATCCTTA | AATTAGGGCA | TGCGGCGAGT | ATTGCAACAA | CTGCCAACTC |
| J138     | GGTATCCTTA | AATTAGGGCA | TGCGGCGAGT | ATTGCAACAA | CTGCCAACTC |
| TW183    | GGTATCCTTA | AATTAGGGCA | TGCGGCGAGT | ATTGCAACAA | CTGCCAACTC |
| TOR1     | GGTATCCTTA | AATTAGGGCA | TGCGGCGAGT | ATTGCAACAA | CTGCCAACTC |
| WA97001  | GGTATCCTTA | AATTAGGGCA | TGCGGCGAGT | ATTGCAACAA | CTGCCAACTC |
| 1979     | GGTATCCTTA | AATTAGGGCA | TGCGGCGAGT | ATTGCAACAA | CTGCCAACTC |
| SH511    | GGTATCCTTA | AATTAGGGCA | TGCGGCGAGT | ATTGCAACAA | CTGCCAACTC |

| Identity | 1,410      | 1,420      | 1,430      | 1,440       | 1,450      |
|----------|------------|------------|------------|-------------|------------|
| B26      | TGAGACTCCA | TCAACTAGTG | TAGGCTCCCA | GGTCA TCATT | AATAACCTTG |
| LPCoLN   | TGAGACTCCA | TCAACTAGTG | TAGGCTCCCA | GGTCA TCATT | AATAACCTTG |
| DE177    | TGAGACTCCA | TCAACTAGTG | TAGGCTCCCA | GGTCA TCATT | AATAACCTTG |
| AR39     | TGAGACTCCA | TCAACTAGTG | TAGGCTCCCA | GGTCA TCATT | AATAACCTTG |
| CWL029   | TGAGACTCCA | TCAACTAGTG | TAGGCTCCCA | GGTCA TCATT | AATAACCTTG |
| J138     | TGAGACTCCA | TCAACTAGTG | TAGGCTCCCA | GGTCA TCATT | AATAACCTTG |
| TW183    | TGAGACTCCA | TCAACTAGTG | TAGGCTCCCA | GGTCA TCATT | AATAACCTTG |
| TOR1     | TGAGACTCCA | TCAACTAGTG | TAGGCTCCCA | GGTCA TCATT | AATAACCTTG |
| WA97001  | TGAGACTCCA | TCAACTAGTG | TAGGCTCCCA | GGTCA TCATT | AATAACCTTG |
| 1979     | TGAGACTCCA | TCAACTAGTG | TAGGCTCCCA | GGTCA TCATT | AATAACCTTG |
| SH511    | TGAGACTCCA | TCAACTAGTG | TAGGCTCCCA | GGTCA TCATT | AATAACCTTG |

| Identity | 1,460      | 1,470      | 1,480     | 1,490      | 1,500       |
|----------|------------|------------|-----------|------------|-------------|
| B26      | CGATTAACTT | CCCCTCGATC | TTAGCAAAG | GAAAAGCTCC | TACCTTG TGG |
| LPCoLN   | CGATTAACTT | CCCCTCGATC | TTAGCAAAG | GAAAAGCTCC | TACCTTG TGG |
| DE177    | CGATTAACTT | CCCCTCGATC | TTAGCAAAG | GAAAAGCTCC | TACCTTG TGG |
| AR39     | CGATTAACTT | CCCCTCGATC | TTAGCAAAG | GAAAAGCTCC | TACCTTG TGG |
| CWL029   | CGATTAACTT | CCCCTCGATC | TTAGCAAAG | GAAAAGCTCC | TACCTTG TGG |
| J138     | CGATTAACTT | CCCCTCGATC | TTAGCAAAG | GAAAAGCTCC | TACCTTG TGG |
| TW183    | CGATTAACTT | CCCCTCGATC | TTAGCAAAG | GAAAAGCTCC | TACCTTG TGG |
| TOR1     | CGATTAACTT | CCCCTCGATC | TTAGCAAAG | GAAAAGCTCC | TACCTTG TGG |
| WA97001  | CGATTAACTT | CCCCTCGATC | TTAGCAAAG | GAAAAGCTCC | TACCTTG TGG |
| 1979     | CGATTAACTT | CCCCTCGATC | TTAGCAAAG | GAAAAGCTCC | TACCTTG TGG |
| SH511    | CGATTAACTT | CCCCTCGATC | TTAGCAAAG | GAAAAGCTCC | TACCTTG TGG |

Identity 

1,510 1,520 1,530 1,540 1,550

B26 ATCCGTCCTC TACAATCTAG TGCTCCTTTC ACAGAGGACA ATAAACCTAC  
 LPCoLN ATCCGTCCTC TACAATCTAG TGCTCCTTTC ACAGAGGACA ATAAACCTAC  
 DE177 ATCCGTCCTC TACAATCTAG TGCTCCTTTC ACAGAGGACA ATAAACCTAC  
 AR39 ATCCGTCCTC TACAATCTAG TGCTCCTTTC ACAGAGGACA ATAAACCTAC  
 CWL029 ATCCGTCCTC TACAATCTAG TGCTCCTTTC ACAGAGGACA ATAAACCTAC  
 J138 ATCCGTCCTC TACAATCTAG TGCTCCTTTC ACAGAGGACA ATAAACCTAC  
 TW183 ATCCGTCCTC TACAATCTAG TGCTCCTTTC ACAGAGGACA ATAAACCTAC  
 TOR1 ATCCGTCCTC TACAATCTAG TGCTCCTTTC ACAGAGGACA ATAAACCTAC  
 WA97001 ATCCGTCCTC TACAATCTAG TGCTCCTTTC ACAGAGGACA ATAAACCTAC  
 1979 ATCCGTCCTC TACAATCTAG TGCTCCTTTC ACAGAGGACA ATAAACCTAC  
 SH511 ATCCGTCCTC TACAATCTAG TGCTCCTTTC ACAGAGGACA ATAAACCTAC

Identity 

1,560 1,570 1,580 1,590 1,600

B26 AATTA CTTTA TCAGGTCCTC TGACACTCTT AAATGAGGAA AACCGCGATC  
 LPCoLN AATTA CTTTA TCAGGTCCTC TGACACTCTT AAATGAGGAA AACCGCGATC  
 DE177 AATTA CTTTA TCAGGTCCTC TGACACTCTT AAATGAGGAA AACCGCGATC  
 AR39 AATTA CTTTA TCAGGTCCTC TGACACTCTT AAATGAGGAA AACCGCGATC  
 CWL029 AATTA CTTTA TCAGGTCCTC TGACACTCTT AAATGAGGAA AACCGCGATC  
 J138 AATTA CTTTA TCAGGTCCTC TGACACTCTT AAATGAGGAA AACCGCGATC  
 TW183 AATTA CTTTA TCAGGTCCTC TGACACTCTT AAATGAGGAA AACCGCGATC  
 TOR1 AATTA CTTTA TCAGGTCCTC TGACACTCTT AAATGAGGAA AACCGCGATC  
 WA97001 AATTA CTTTA TCAGGTCCTC TGACACTCTT AAATGAGGAA AACCGCGATC  
 1979 AATTA CTTTA TCAGGTCCTC TGACACTCTT AAATGAGGAA AACCGCGATC  
 SH511 AATTA CTTTA TCAGGTCCTC TGACACTCTT AAATGAGGAA AACCGCGATC

Identity 

1,610 1,620 1,630 1,640 1,650

B26 CCTACGACAG TATGATCTC TCTGAGCCTT TACAAAAACAT TCATCTTCTT  
 LPCoLN CCTACGACAG TATGATCTC TCTGAGCCTT TACAAAAACAT TCATCTTCTT  
 DE177 CCTACGACAG TATGATCTC TCTGAGCCTT TACAAAAACAT TCATCTTCTT  
 AR39 CCTACGACAG TATAGATCTC TCTGAGCCTT TACAAAAACAT TCATCTTCTT  
 CWL029 CCTACGACAG TATAGATCTC TCTGAGCCTT TACAAAAACAT TCATCTTCTT  
 J138 CCTACGACAG TATAGATCTC TCTGAGCCTT TACAAAAACAT TCATCTTCTT  
 TW183 CCTACGACAG TATAGATCTC TCTGAGCCTT TACAAAAACAT TCATCTTCTT  
 TOR1 CCTACGACAG TATAGATCTC TCTGAGCCTT TACAAAAACAT TCATCTTCTT  
 WA97001 CCTACGACAG TATAGATCTC TCTGAGCCTT TACAAAAACAT TCATCTTCTT  
 1979 CCTACGACAG TATAGATCTC TCTGAGCCTT TACAAAAACAT TCATCTTCTT  
 SH511 CCTACGACAG TATAGATCTC TCTGAGCCTT TACAAAAACAT TCATCTTCTT

Identity 

1,660 1,670 1,680 1,690 1,700

B26 TCTTTATCGG ATGTAAACAGC ACGTCAATATC AATAACCGATA ACTTTCATCC  
 LPCoLN TCTTTATCGG ATGTAAACAGC ACGTCAATATC AATAACCGATA ACTTTCATCC  
 DE177 TCTTTATCGG ATGTAAACAGC ACGTCAATATC AATAACCGATA ACTTTCATCC  
 AR39 TCTTTATCGG ATGTAAACAGC ACGTCAATATC AATAACCGATA ACTTTCATCC  
 CWL029 TCTTTATCGG ATGTAAACAGC ACGTCAATATC AATAACCGATA ACTTTCATCC  
 J138 TCTTTATCGG ATGTAAACAGC ACGTCAATATC AATAACCGATA ACTTTCATCC  
 TW183 TCTTTATCGG ATGTAAACAGC ACGTCAATATC AATAACCGATA ACTTTCATCC  
 TOR1 TCTTTATCGG ATGTAAACAGC ACGTCAATATC AATAACCGATA ACTTTCATCC  
 WA97001 TCTTTATCGG ATGTAAACAGC ACGTCAATATC AATAACCGATA ACTTTCATCC  
 1979 TCTTTATCGG ATGTAAACAGC ACGTCAATATC AATAACCGATA ACTTTCATCC  
 SH511 TCTTTATCGG ATGTAAACAGC ACGTCAATATC AATAACCGATA ACTTTCATCC



Identity  1,710 1,720 1,730 1,740 1,750

B26 TGAAAGCTTA AATACGACTG AGCATTACGG TTATCAAGGC ATCTGGTCTC  
 LPCoLN TGAAAGCTTA AATACGACTG AGCATTACGG TTATCAAGGC ATCTGGTCTC  
 DE177 TGAAAGCTTA AATGCGACTG AGCATTACGG TTATCAAGGC ATCTGGTCTC  
 AR39 TGAAAGCTTA AATGCGACTG AGCATTACGG TTATCAAGGC ATCTGGTCTC  
 CWL029 TGAAAGCTTA AATGCGACTG AGCATTACGG TTATCAAGGC ATCTGGTCTC  
 J138 TGAAAGCTTA AATGCGACTG AGCATTACGG TTATCAAGGC ATCTGGTCTC  
 TW183 TGAAAGCTTA AATGCGACTG AGCATTACGG TTATCAAGGC ATCTGGTCTC  
 TOR1 TGAAAGCTTA AATGCGACTG AGCATTACGG TTATCAAGGC ATCTGGTCTC  
 WA97001 TGAAAGCTTA AATGCGACTG AGCATTACGG TTATCAAGGC ATCTGGTCTC  
 1979 TGAAAGCTTA AATGCGACTG AGCATTACGG TTATCAAGGC ATCTGGTCTC  
 SH511 TGAAAGCTTA AATGCGACTG AGCATTACGG TTATCAAGGC ATCTGGTCTC

Identity  1,760 1,770 1,780 1,790 1,800

B26 CTTATTGGGT AGAGACGATA ACAACAACAA ATAAAGCTTC TATAGAGACG  
 LPCoLN CTTATTGGGT AGAGACGATA ACAACAACAA ATAAAGCTTC TATAGAGACG  
 DE177 CTTATTGGGT AGAGACGATA ACAACAACAA ATAAAGCTTC TATAGAGACG  
 AR39 CTTATTGGGT AGAGACGATA ACAACAACAA ATAAAGCTTC TATAGAGACG  
 CWL029 CTTATTGGGT AGAGACGATA ACAACAACAA ATAAAGCTTC TATAGAGACG  
 J138 CTTATTGGGT AGAGACGATA ACAACAACAA ATAAAGCTTC TATAGAGACG  
 TW183 CTTATTGGGT AGAGACGATA ACAACAACAA ATAAAGCTTC TATAGAGACG  
 TOR1 CTTATTGGGT AGAGACGATA ACAACAACAA ATAAAGCTTC TATAGAGACG  
 WA97001 CTTATTGGGT AGAGACGATA ACAACAACAA ATAAAGCTTC TATAGAGACG  
 1979 CTTATTGGGT AGAGACGATA ACAACAACAA ATAAAGCTTC TATAGAGACG  
 SH511 CTTATTGGGT AGAGACGATA ACAACAACAA ATAAAGCTTC TATAGAGACG

Identity  1,810 1,820 1,830 1,840 1,850

B26 GCAAAACACC TCTAAGAGC TCTGTATGCC AATTGGACTC CCTTAGGATA  
 LPCoLN GCAAAACACC TCTAAGAGC TCTGTATGCC AATTGGACTC CCTTAGGATA  
 DE177 GCAAAACACC TCTAAGAGC TCTGTATGCC AATTGGACTC CCTTAGGATA  
 AR39 GCAAAACACC TCTACAGAGC TCTGTATGCC AATTGGACTC CCTTAGGATA  
 CWL029 GCAAAACACC TCTACAGAGC TCTGTATGCC AATTGGACTC CCTTAGGATA  
 J138 GCAAAACACC TCTACAGAGC TCTGTATGCC AATTGGACTC CCTTAGGATA  
 TW183 GCAAAACACC TCTACAGAGC TCTGTATGCC AATTGGACTC CCTTAGGATA  
 TOR1 GCAAAACACC TCTACAGAGC TCTGTATGCC AATTGGACTC CCTTAGGATA  
 WA97001 GCAAAACACC TCTACAGAGC TCTGTATGCC AATTGGACTC CCTTAGGATA  
 1979 GCAAAACACC TCTAAGAGC TCTGTATGCC AATTGGACTC CCTTAGGATA  
 SH511 GCAAAACACC TCTAAGAGC TCTGTATGCC AATTGGACTC CCTTAGGATA

Identity  1,860 1,870 1,880 1,890 1,900

B26 TAAGGTCAAT CCTGAATACC AAGGAGATCT TGCTACGACT CCCCTATGGC  
 LPCoLN TAAGGTCAAT CCTGAATACC AAGGAGATCT TGCTACGACT CCCCTATGGC  
 DE177 TAAGGTCAAT CCTGAATACC AAGGAGATCT TGCTACGACT CCCCTATGGC  
 AR39 TAAGGTCAAT CCTGAATACC AAGGAGATCT TGCTACGACT CCCCTATGGC  
 CWL029 TAAGGTCAAT CCTGAATACC AAGGAGATCT TGCTACGACT CCCCTATGGC  
 J138 TAAGGTCAAT CCTGAATACC AAGGAGATCT TGCTACGACT CCCCTATGGC  
 TW183 TAAGGTCAAT CCTGAATACC AAGGAGATCT TGCTACGACT CCCCTATGGC  
 TOR1 TAAGGTCAAT CCTGAATACC AAGGAGATCT TGCTACGACT CCCCTATGGC  
 WA97001 TAAGGTCAAT CCTGAATACC AAGGAGATCT TGCTACGACT CCCCTATGGC  
 1979 TAAGGTCAAT CCTGAATACC AAGGAAATCT TGCTACGACT CCCCTATGGC  
 SH511 TAAGGTCAAT CCTGAATACC AAGGAAATCT TGCTACGACT CCCCTATGGC

1,910 1,920 1,930 1,940 1,950

Identity

|         |               |              |              |              |              |
|---------|---------------|--------------|--------------|--------------|--------------|
| B26     | AA TCC TTT CA | TACTA TG TTC | TCTCTA T TAA | GAAG TTA TAA | TCGAA CTGG T |
| LPCoLN  | AA TCC TTT CA | TACTA TG TTC | TCTCTA T TAA | GAAG TTA TAA | TCGAA CTGG T |
| DE177   | AA TCC TTT CA | TACTA TG TTC | TCTCTA T TAA | GAAG TTA TAA | TCGAA CTGG T |
| AR39    | AA TCC TTT CA | TACTA TG TTC | TCTCTA T TAA | GAAG TTA TAA | TCGAA CTGG T |
| CWL029  | AA TCC TTT CA | TACTA TG TTC | TCTCTA T TAA | GAAG TTA TAA | TCGAA CTGG T |
| J138    | AA TCC TTT CA | TACTA TG TTC | TCTCTA T TAA | GAAG TTA TAA | TCGAA CTGG T |
| TW183   | AA TCC TTT CA | TACTA TG TTC | TCTCTA T TAA | GAAG TTA TAA | TCGAA CTGG T |
| TOR1    | AA TCC TTT CA | TACTA TG TTC | TCTCTA T TAA | GAAG TTA TAA | TCGAA CTGG T |
| WA97001 | AA TCC TTT CA | TACTA TG TTC | TCTCTA T TAA | GAAG TTA TAA | TCGAA CTGG T |
| 1979    | AA TCC TTT CA | TACTA TG TTC | TCTCTA T TAA | GAAG TTA TAA | TCGAA CTGG T |
| SH511   | AA TCC TTT CA | TACTA TG TTC | TCTCTA T TAA | GAAG TTA TAA | TCGAA CTGG T |

1,960 1,970 1,980 1,990 2,000

Identity

|         |             |            |            |            |            |
|---------|-------------|------------|------------|------------|------------|
| B26     | GAT TCTGATA | TCGAGAGGCC | TTTCTTAGAA | ATTCAAGG A | TTGCCGACGG |
| LPCoLN  | GAT TCTGATA | TCGAGAGGCC | TTTCTTAGAA | ATTCAAGG A | TTGCCGACGG |
| DE177   | GAT TCTGATA | TCGAGAGGCC | TTTCTTAGAA | ATTCAAGGGA | TTGCCGACGG |
| AR39    | GAT TCTGATA | TCGAGAGGCC | TTTCTTAGAA | ATTCAAGGGA | TTGCCGACGG |
| CWL029  | GAT TCTGATA | TCGAGAGGCC | TTTCTTAGAA | ATTCAAGGGA | TTGCCGACGG |
| J138    | GAT TCTGATA | TCGAGAGGCC | TTTCTTAGAA | ATTCAAGGGA | TTGCCGACGG |
| TW183   | GAT TCTGATA | TCGAGAGGCC | TTTCTTAGAA | ATTCAAGGGA | TTGCCGACGG |
| TOR1    | GAT TCTGATA | TCGAGAGGCC | TTTCTTAGAA | ATTCAAGGGA | TTGCCGACGG |
| WA97001 | GAT TCTGATA | TCGAGAGGCC | TTTCTTAGAA | ATTCAAGGGA | TTGCCGACGG |
| 1979    | GAT TCTGATA | TCGAGAGGCC | TTTCTTAGAA | ATTCAAGGGA | TTGCCGACGG |
| SH511   | GAT TCTGATA | TCGAGAGGCC | TTTCTTAGAA | ATTCAAGGGA | TTGCCGACGG |

2,010 2,020 2,030 2,040 2,050

Identity

|         |            |             |              |              |            |
|---------|------------|-------------|--------------|--------------|------------|
| B26     | CCTCTTTGTT | CATCAAAAATA | GCA TCCC CGG | G A CTCCAGGA | TTCCGTATCC |
| LPCoLN  | CCTCTTTGTT | CATCAAAAATA | GCA TCCC CGG | G A CTCCAGGA | TTCCGTATCC |
| DE177   | CCTCTTTGTT | CATCAAAAATA | GCA TCCC CGG | GGCTCCAGGA   | TTCCGTATCC |
| AR39    | CCTCTTTGTT | CATCAAAAATA | GCA TCCC CGG | GGCTCCAGGA   | TTCCGTATCC |
| CWL029  | CCTCTTTGTT | CATCAAAAATA | GCA TCCC CGG | GGCTCCAGGA   | TTCCGTATCC |
| J138    | CCTCTTTGTT | CATCAAAAATA | GCA TCCC CGG | GGCTCCAGGA   | TTCCGTATCC |
| TW183   | CCTCTTTGTT | CATCAAAAATA | GCA TCCC CGG | GGCTCCAGGA   | TTCCGTATCC |
| TOR1    | CCTCTTTGTT | CATCAAAAATA | GCA TCCC CGG | GGCTCCAGGA   | TTCCGTATCC |
| WA97001 | CCTCTTTGTT | CATCAAAAATA | GCA TCCC CGG | GGCTCCAGGA   | TTCCGTATCC |
| 1979    | CCTCTTTGTT | CATCAAAAATA | GCA TCCC CGG | GGCTCCAGGA   | TTCCGTATCC |
| SH511   | CCTCTTTGTT | CATCAAAAATA | GCA TCCC CGG | GGCTCCAGGA   | TTCCGTATCC |

2,060 2,070 2,080 2,090 2,100

Identity

|         |             |            |            |             |              |
|---------|-------------|------------|------------|-------------|--------------|
| B26     | AA TCTACAGG | GTATTCCTTA | CAAGCATCCT | CCGAAA CTTC | TTT G CATCAG |
| LPCoLN  | AA TCTACAGG | GTATTCCTTA | CAAGCATCCT | CCGAAA CTTC | TTT G CATCAG |
| DE177   | AA TCTACAGG | GTATTCCTTA | CAAGCATCCT | CCGAAA CTTC | TTTACATCAG   |
| AR39    | AA TCTACAGG | GTATTCCTTA | CAAGCATCCT | CCGAAA CTTC | TTTACATCAG   |
| CWL029  | AA TCTACAGG | GTATTCCTTA | CAAGCATCCT | CCGAAA CTTC | TTTACATCAG   |
| J138    | AA TCTACAGG | GTATTCCTTA | CAAGCATCCT | CCGAAA CTTC | TTTACATCAG   |
| TW183   | AA TCTACAGG | GTATTCCTTA | CAAGCATCCT | CCGAAA CTTC | TTTACATCAG   |
| TOR1    | AA TCTACAGG | GTATTCCTTA | CAAGCATCCT | CCGAAA CTTC | TTTACATCAG   |
| WA97001 | AA TCTACAGG | GTATTCCTTA | CAAGCATCCT | CCGAAA CTTC | TTTACATCAG   |
| 1979    | AA TCTACAGG | GTATTCCTTA | CAAGCATCCT | CCGAAA CTTC | TTTACATCAG   |
| SH511   | AA TCTACAGG | GTATTCCTTA | CAAGCATCCT | CCGAAA CTTC | TTTACATCAG   |

| Identity | 2,110       | 2,120       | 2,130       | 2,140       | 2,150       |
|----------|-------------|-------------|-------------|-------------|-------------|
| B26      | AAAA TCTCCT | TAGG TTTTGC | ACAG TTCCTC | ACCCG CACTA | AAGAAA TCGG |
| LPCoLN   | AAAA TCTCCT | TAGG TTTTGC | ACAG TTCCTC | ACCCG CACTA | AAGAAA TCGG |
| DE177    | AAAA TCTCCT | TAGG TTTTGC | ACAG TTCCTC | ACCCG CACTA | AAGAAA TCGG |
| AR39     | AAAA TCTCCT | TAGG TTTTGC | ACAG TTCCTC | ACCCG CACTA | AAGAAA TCGG |
| CWL029   | AAAA TCTCCT | TAGG TTTTGC | ACAG TTCCTC | ACCCG CACTA | AAGAAA TCGG |
| J138     | AAAA TCTCCT | TAGG TTTTGC | ACAG TTCCTC | ACCCG CACTA | AAGAAA TCGG |
| TW183    | AAAA TCTCCT | TAGG TTTTGC | ACAG TTCCTC | ACCCG CACTA | AAGAAA TCGG |
| TOR1     | AAAA TCTCCT | TAGG TTTTGC | ACAG TTCCTC | ACCCG CACTA | AAGAAA TCGG |
| WA97001  | AAAA TCTCCT | TAGG TTTTGC | ACAG TTCCTC | ACCCG CACTA | AAGAAA TCGG |
| 1979     | AAAA TCTCCT | TAGG TTTTGC | ACAG TTCCTC | ACCCG CACTA | AAGAAA TCGG |
| SH511    | AAAA TCTCCT | TAGG TTTTGC | ACAG TTCCTC | ACCCG CACTA | AAGAAA TCGG |

| Identity | 2,160      | 2,169     |
|----------|------------|-----------|
| B26      | ATCAAGCAAC | AACGTCTCG |
| LPCoLN   | ATCAAGCAAC | AACGTCTCG |
| DE177    | ATCAAGCAAC | AACGTCTCG |
| AR39     | ATCAAGCAAC | AACGTCTCG |
| CWL029   | ATCAAGCAAC | AACGTCTCG |
| J138     | ATCAAGCAAC | AACGTCTCG |
| TW183    | ATCAAGCAAC | AACGTCTCG |
| TOR1     | ATCAAGCAAC | AACGTCTCG |
| WA97001  | ATCAAGCAAC | AACGTCTCG |
| 1979     | ATCAAGCAAC | AACGTCTCG |
| SH511    | ATCAAGCAAC | AACGTCTCG |



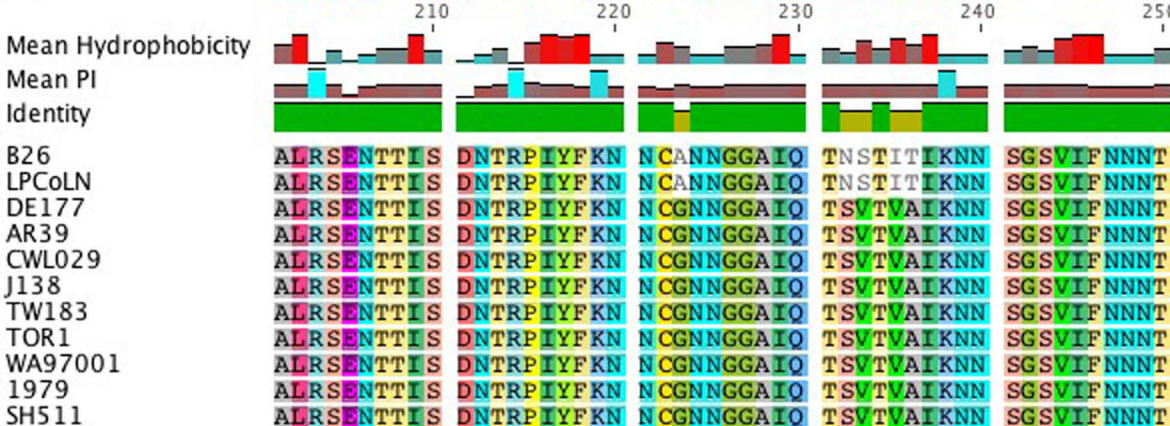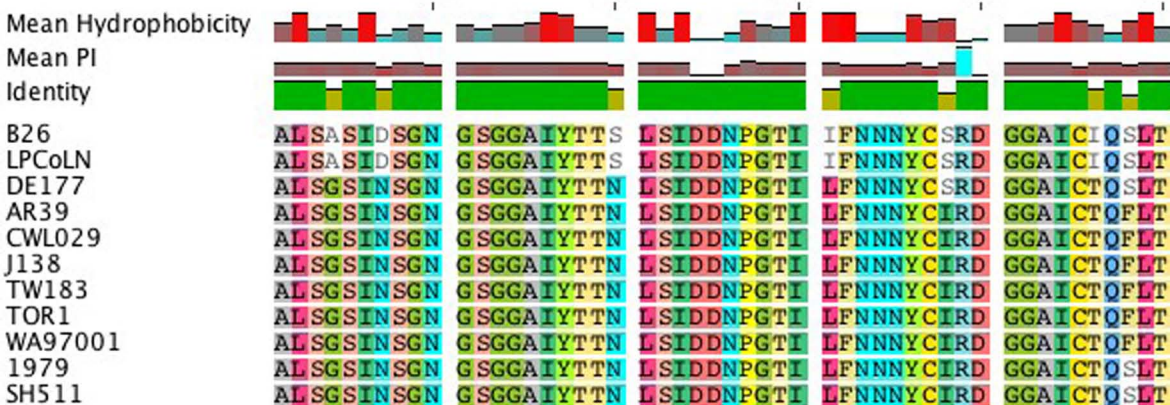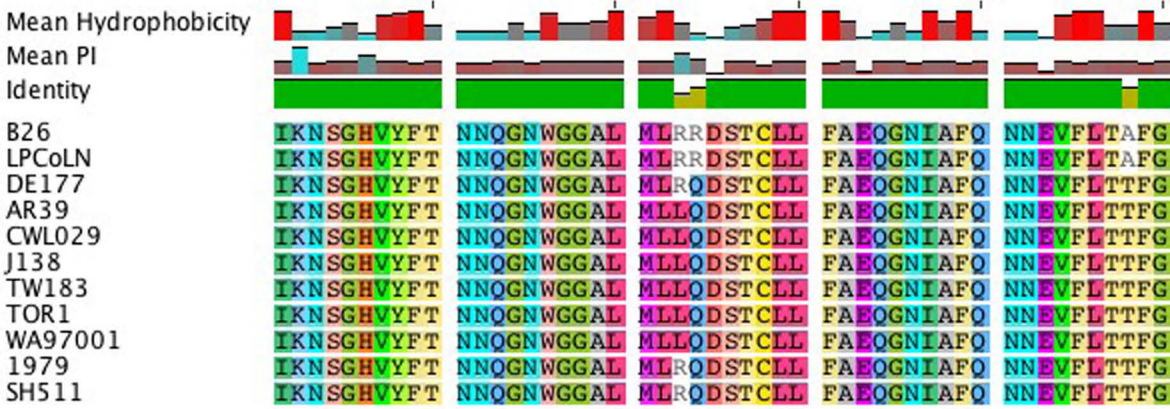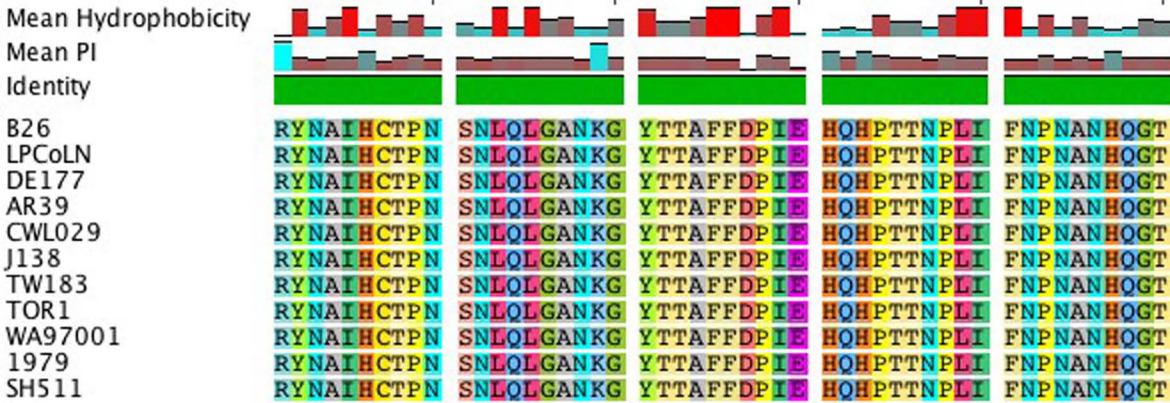



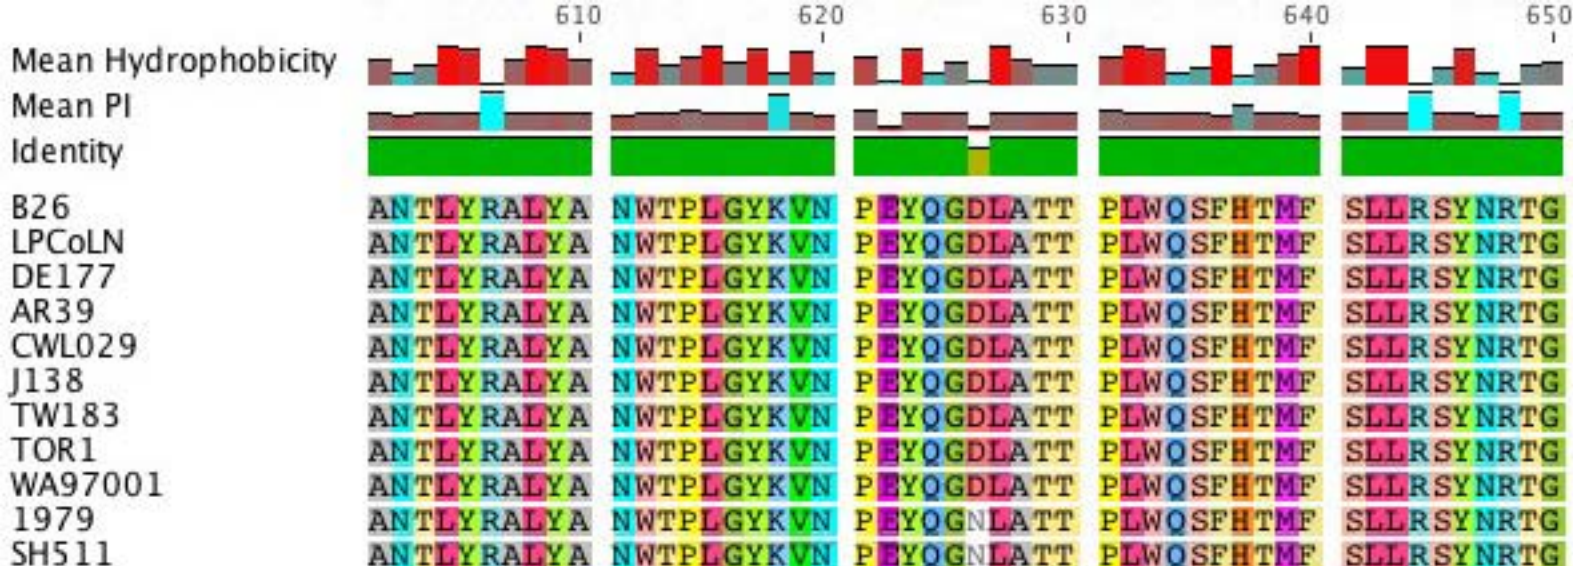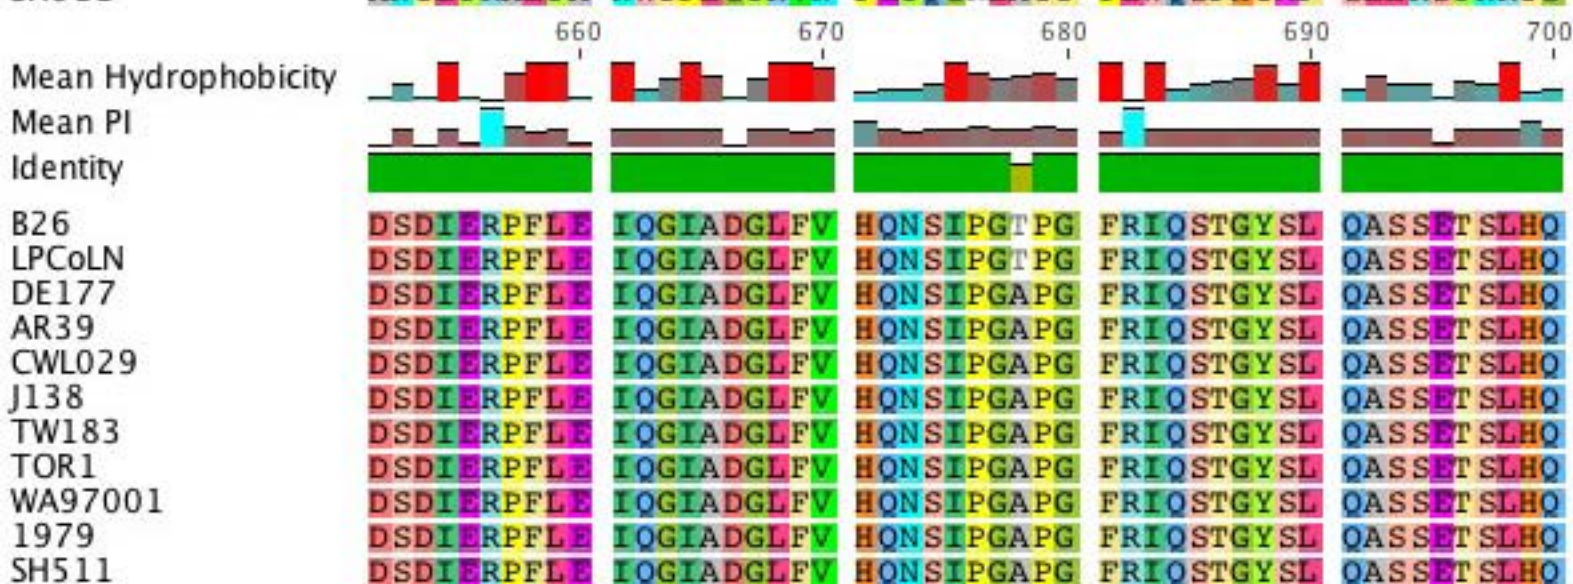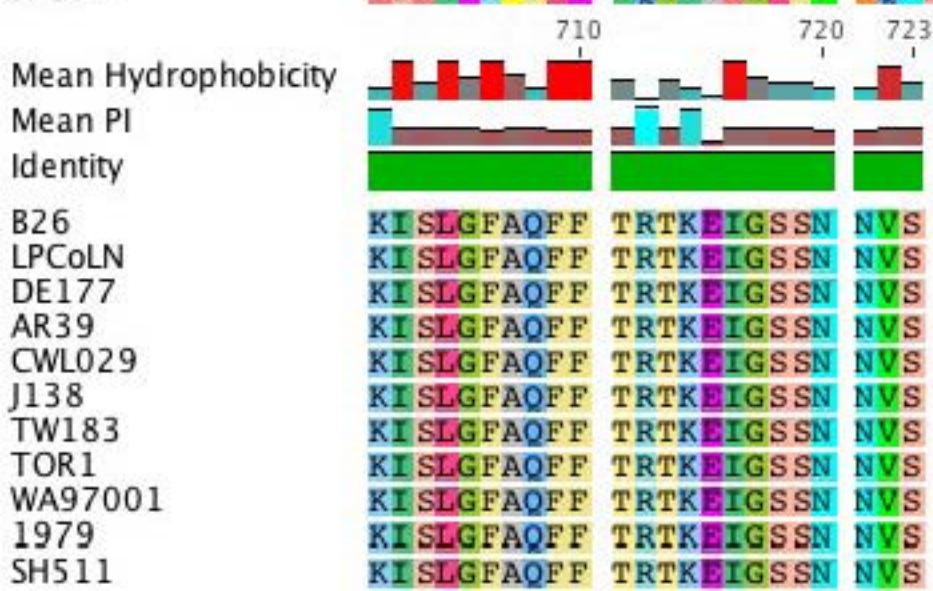

Supplement: ppat.1000903.s005.pdf [file ppat.1000903.s005.pdf]
