# Supplementary material for: Chlamydia pneumoniae Is Genetically Diverse in Animals and Appears to Have Crossed the Host Barrier to Humans on (At Least) Two Occasions
Source: PubMed Central journal article supplement (PMC2873915; doi:10.1371/journal.ppat.1000903), 2010-05-20

| Identity   | 110        | 120                 | 130        | 140        | 150        |
|------------|------------|---------------------|------------|------------|------------|
| B26        | GCCATACATT | GGAGTACAAT          | GGTCTCGAGC | AACTTTTGAT | GCTGATAACA |
| B37        | GCCATACATT | GGAGTACAAT          | GGTCTCGAGC | AACTTTTGAT | GCTGATAACA |
| WBB        | GCCATACATT | GGAGTACAAT          | GGTCTCGAGC | AACTTTTGAT | GCTGATAACA |
| EBB        | GCCATACATT | GGAGTACAAT          | GGTCTCGAGC | AACTTTTGAT | GCTGATAACA |
| LPCoLN     | GCCATACATT | GGAGTACAAT          | GGTCTCGAGC | AACTTTTGAT | GCTGATAACA |
| Pot37      | GCCATACATT | GGAGTACAAT          | GGTCTCGAGC | AACTTTTGAT | GCTGATAACA |
| CPXT1      | GCCATACATT | GGAGTACAAT          | GGTCTCGAGC | AACTTTTGAT | GCTGATAACA |
| DE177      | GCCATACATT | GGAGTACAAT          | GGTCTCGAGC | AACTTTTGAT | GCTGATAACA |
| GBF        | GCCATACATT | GGAGTACAAT          | GGTCTCGAGC | AACTTTTGAT | GCTGATAACA |
| BMTF-type1 | GCCATACATT | GGAGTACAAT          | GGTCTCGAGC | AACTTTTGAT | GCTGATAACA |
| Burpyth    | GCCATACATT | GGAGTACAAT          | GGTCTCGAGC | AACTTTTGAT | GCTGATAACA |
| PuffAdd    | GCCATACATT | GGAGTACAAT          | GGTCTCGAGC | AACTTTTGAT | GCTGATAACA |
| cham       | GCCATACATT | GGAGTACAAT          | GGTCTCGAGC | AACTTTTGAT | GCTGATAACA |
| Iguana     | GCCATACATT | GGAGTACAAT          | GGTCTCGAGC | AACTTTTGAT | GCTGATAACA |
| GST        | GCCATACATT | GGAGTACAAT          | GGTCTCGAGC | AACTTTTGAT | GCTGATAACA |
| N16        | GCCATACATT | GGAGT <b>C</b> CAAT | GGTCTCGAGC | AACTTTTGAT | GCTGATAACA |
| AR39       | GCCATACATT | GGAGTACAAT          | GGTCTCGAGC | AACTTTTGAT | GCTGATAACA |
| CWL029     | GCCATACATT | GGAGTACAAT          | GGTCTCGAGC | AACTTTTGAT | GCTGATAACA |
| J138       | GCCATACATT | GGAGTACAAT          | GGTCTCGAGC | AACTTTTGAT | GCTGATAACA |
| TW183      | GCCATACATT | GGAGTACAAT          | GGTCTCGAGC | AACTTTTGAT | GCTGATAACA |
| IOL207     | GCCATACATT | GGAGTACAAT          | GGTCTCGAGC | AACTTTTGAT | GCTGATAACA |
| LKK1       | GCCATACATT | GGAGTACAAT          | GGTCTCGAGC | AACTTTTGAT | GCTGATAACA |
| TOR1       | GCCATACATT | GGAGTACAAT          | GGTCTCGAGC | AACTTTTGAT | GCTGATAACA |
| WA97001    | GCCATACATT | GGAGTACAAT          | GGTCTCGAGC | AACTTTTGAT | GCTGATAACA |
| 1979       | GCCATACATT | GGAGTACAAT          | GGTCTCGAGC | AACTTTTGAT | GCTGATAACA |
| SH511      | GCCATACATT | GGAGTACAAT          | GGTCTCGAGC | AACTTTTGAT | GCTGATAACA |

| Identity   | 160         | 170                | 180        | 190                 | 200        |
|------------|-------------|--------------------|------------|---------------------|------------|
| B26        | TCCGCA TTGC | TCAGCCAAAA         | CTACCTACAG | CTGTTTTAAA          | CTTAACTGCA |
| B37        | TCCGCA TTGC | TCAGCCAAAA         | CTACCTACAG | CTGTTTTAAA          | CTTAACTGCA |
| WBB        | TCCGCA TTGC | TCAGCCAAAA         | CTACCTACAG | CTGTTTTAAA          | CTTAACTGCA |
| EBB        | TCCGCA TTGC | TCAGCCAAAA         | CTACCTACAG | CTGTTTTAAA          | CTTAACTGCA |
| LPCoLN     | TCCGCA TTGC | TCAGCCAAAA         | CTACCTACAG | CTGTTTTAAA          | CTTAACTGCA |
| Pot37      | TCCGCA TTGC | TCAGCCAAAA         | CTACCTACAG | CTGTTTTAAA          | CTTAACTGCA |
| CPXT1      | TCCGCA TTGC | TCAGCCAAAA         | CTACCTACAG | CTGTTTTAAA          | CTTAACTGCA |
| DE177      | TCCGCA TTGC | TCAGCCAAAA         | CTACCTACAG | CTGTTTTAAA          | CTTAACTGCA |
| GBF        | TCCGCA TTGC | TCAGCCAAAA         | CTACCTACAG | CTGTTTTAAA          | CTTAACTGCA |
| BMTF-type1 | TCCGCA TTGC | TCAGCCAAAA         | CTACCTACAG | CTGTTTTAAA          | CTTAACTGCA |
| Burpyth    | TCCGCA TTGC | TCAGCCAAAA         | CTACCTACAG | CTGTTTTAAA          | CTTAACTGCA |
| PuffAdd    | TCCGCA TTGC | TCAGCCAAAA         | CTACCTACAG | CTGTTTTAAA          | CTTAACTGCA |
| cham       | TCCGCA TTGC | TCAGCCAAAA         | CTACCTACAG | <b>T</b> TGTTTTAAA  | CTTAACTGCA |
| Iguana     | TCCGCA TTGC | TCAGCCAAAA         | CTACCTACAG | CTGTTTTAAA          | CTTAACTGCA |
| GST        | TCCGCA TTGC | TCAGCCAAAA         | CTACCTACAG | CTGTTTTAAA          | CTTAACTGCA |
| N16        | TCCGCA TTGC | TCAGCCAAA <b>G</b> | CTACCTACAG | CT <b>A</b> TTTTAAA | CTTAACTGCA |
| AR39       | TCCGCA TTGC | TCAGCCAAAA         | CTACCTACAG | CTGTTTTAAA          | CTTAACTGCA |
| CWL029     | TCCGCA TTGC | TCAGCCAAAA         | CTACCTACAG | CTGTTTTAAA          | CTTAACTGCA |
| J138       | TCCGCA TTGC | TCAGCCAAAA         | CTACCTACAG | CTGTTTTAAA          | CTTAACTGCA |
| TW183      | TCCGCA TTGC | TCAGCCAAAA         | CTACCTACAG | CTGTTTTAAA          | CTTAACTGCA |
| IOL207     | TCCGCA TTGC | TCAGCCAAAA         | CTACCTACAG | CTGTTTTAAA          | CTTAACTGCA |
| LKK1       | TCCGCA TTGC | TCAGCCAAAA         | CTACCTACAG | CTGTTTTAAA          | CTTAACTGCA |
| TOR1       | TCCGCA TTGC | TCAGCCAAAA         | CTACCTACAG | CTGTTTTAAA          | CTTAACTGCA |
| WA97001    | TCCGCA TTGC | TCAGCCAAAA         | CTACCTACAG | CTGTTTTAAA          | CTTAACTGCA |
| 1979       | TCCGCA TTGC | TCAGCCAAAA         | CTACCTACAG | CTGTTTTAAA          | CTTAACTGCA |
| SH511      | TCCGCA TTGC | TCAGCCAAAA         | CTACCTACAG | CTGTTTTAAA          | CTTAACTGCA |

| Identity   | 210        | 220        | 230        | 240         |
|------------|------------|------------|------------|-------------|
| B26        | TGGAAACCTT | CTTTACTAGG | AAATACGACA | ACATTGCCTA  |
| B37        | TGGAAACCTT | CTTTACTAGG | AAATACGACA | ACATTGCCTA  |
| WBB        | TGGAAACCTT | CTTTACTAGG | AAATACGACA | ACATTGCCTA  |
| EBB        | TGGAAACCTT | CTTTACTAGG | AAATACGACA | ACATTGCCTA  |
| LPCoLN     | TGGAAACCTT | CTTTACTAGG | AAATACGACA | ACATTGCCTA  |
| Pot37      | TGGAAACCTT | CTTTACTAGG | AAATACGACA | ACATTGCCTA  |
| CPXT1      | TGGAAACCTT | CTTTACTAGG | AAATGCCACA | ACATTGTCTA  |
| DE177      | TGGAAACCTT | CTTTACTAGG | AAATGCCACA | ACATTGCCTA  |
| GBF        | TGGAAACCTT | CTTTACTAGG | AAATACGACA | ACATTGCCTA  |
| BMTF-type1 | TGGAAACCTT | CTTTACTAGG | AAATGCCACA | GCAATTGTCTA |
| Burpyth    | TGGAAACCTT | CTTTACTAGG | AAATGCCACA | GCAATTGTCTA |
| PuffAdd    | TGGAAACCTT | CTTTACTAGG | AAATGCCACA | GCAATTGTCTA |
| cham       | TGGAAACCTT | CTTTACTAGG | AAATGCCACA | GCAATTGTCTA |
| Iguana     | TGGAAACCTT | CTTTACTAGG | AAATGCCACA | GCAATTGTCTA |
| GST        | TGGAAACCTT | CTTTACTAGG | AAATGCCACA | GCAATTGTCTA |
| N16        | TGGAAACCTT | CTTTACTAGG | GAGTGCCACA | GCTGTCTCT   |
| AR39       | TGGAAACCTT | CTTTACTAGG | AAATGCCACA | GCAATTGTCTA |
| CWL029     | TGGAAACCTT | CTTTACTAGG | AAATGCCACA | GCAATTGTCTA |
| J138       | TGGAAACCTT | CTTTACTAGG | AAATGCCACA | GCAATTGTCTA |
| TW183      | TGGAAACCTT | CTTTACTAGG | AAATGCCACA | GCAATTGTCTA |
| IOL207     | TGGAAACCTT | CTTTACTAGG | AAATGCCACA | GCAATTGTCTA |
| LKK1       | TGGAAACCTT | CTTTACTAGG | AAATGCCACA | GCAATTGTCTA |
| TOR1       | TGGAAACCTT | CTTTACTAGG | AAATGCCACA | GCAATTGTCTA |
| WA97001    | TGGAAACCTT | CTTTACTAGG | AAATGCCACA | GCAATTGTCTA |
| 1979       | TGGAAACCTT | CTTTACTAGG | AAATGCCACA | GCAATTGTCTA |
| SH511      | TGGAAACCTT | CTTTACTAGG | AAATGCCACA | GCAATTGTCTA |

| Identity   | 258      |
|------------|----------|
| B26        | GTTCTCAG |
| B37        | GTTCTCAG |
| WBB        | GTTCTCAG |
| EBB        | GTTCTCAG |
| LPCoLN     | GTTCTCAG |
| Pot37      | GTTCTCAG |
| CPXT1      | GTTCTCAG |
| DE177      | GTTCTCAG |
| GBF        | GTTCTCAG |
| BMTF-type1 | GTTCTCAG |
| Burpyth    | GTTCTCAG |
| PuffAdd    | GTTCTCAG |
| cham       | GTTCTCAG |
| Iguana     | GTTCTCAG |
| GST        | GTTCTCAG |
| N16        | ATTCTCAG |
| AR39       | GTTCTCAG |
| CWL029     | GTTCTCAG |
| J138       | GTTCTCAG |
| TW183      | GTTCTCAG |
| IOL207     | GTTCTCAG |
| LKK1       | GTTCTCAG |
| TOR1       | GTTCTCAG |
| WA97001    | GTTCTCAG |
| 1979       | GTTCTCAG |
| SH511      | GTTCTCAG |

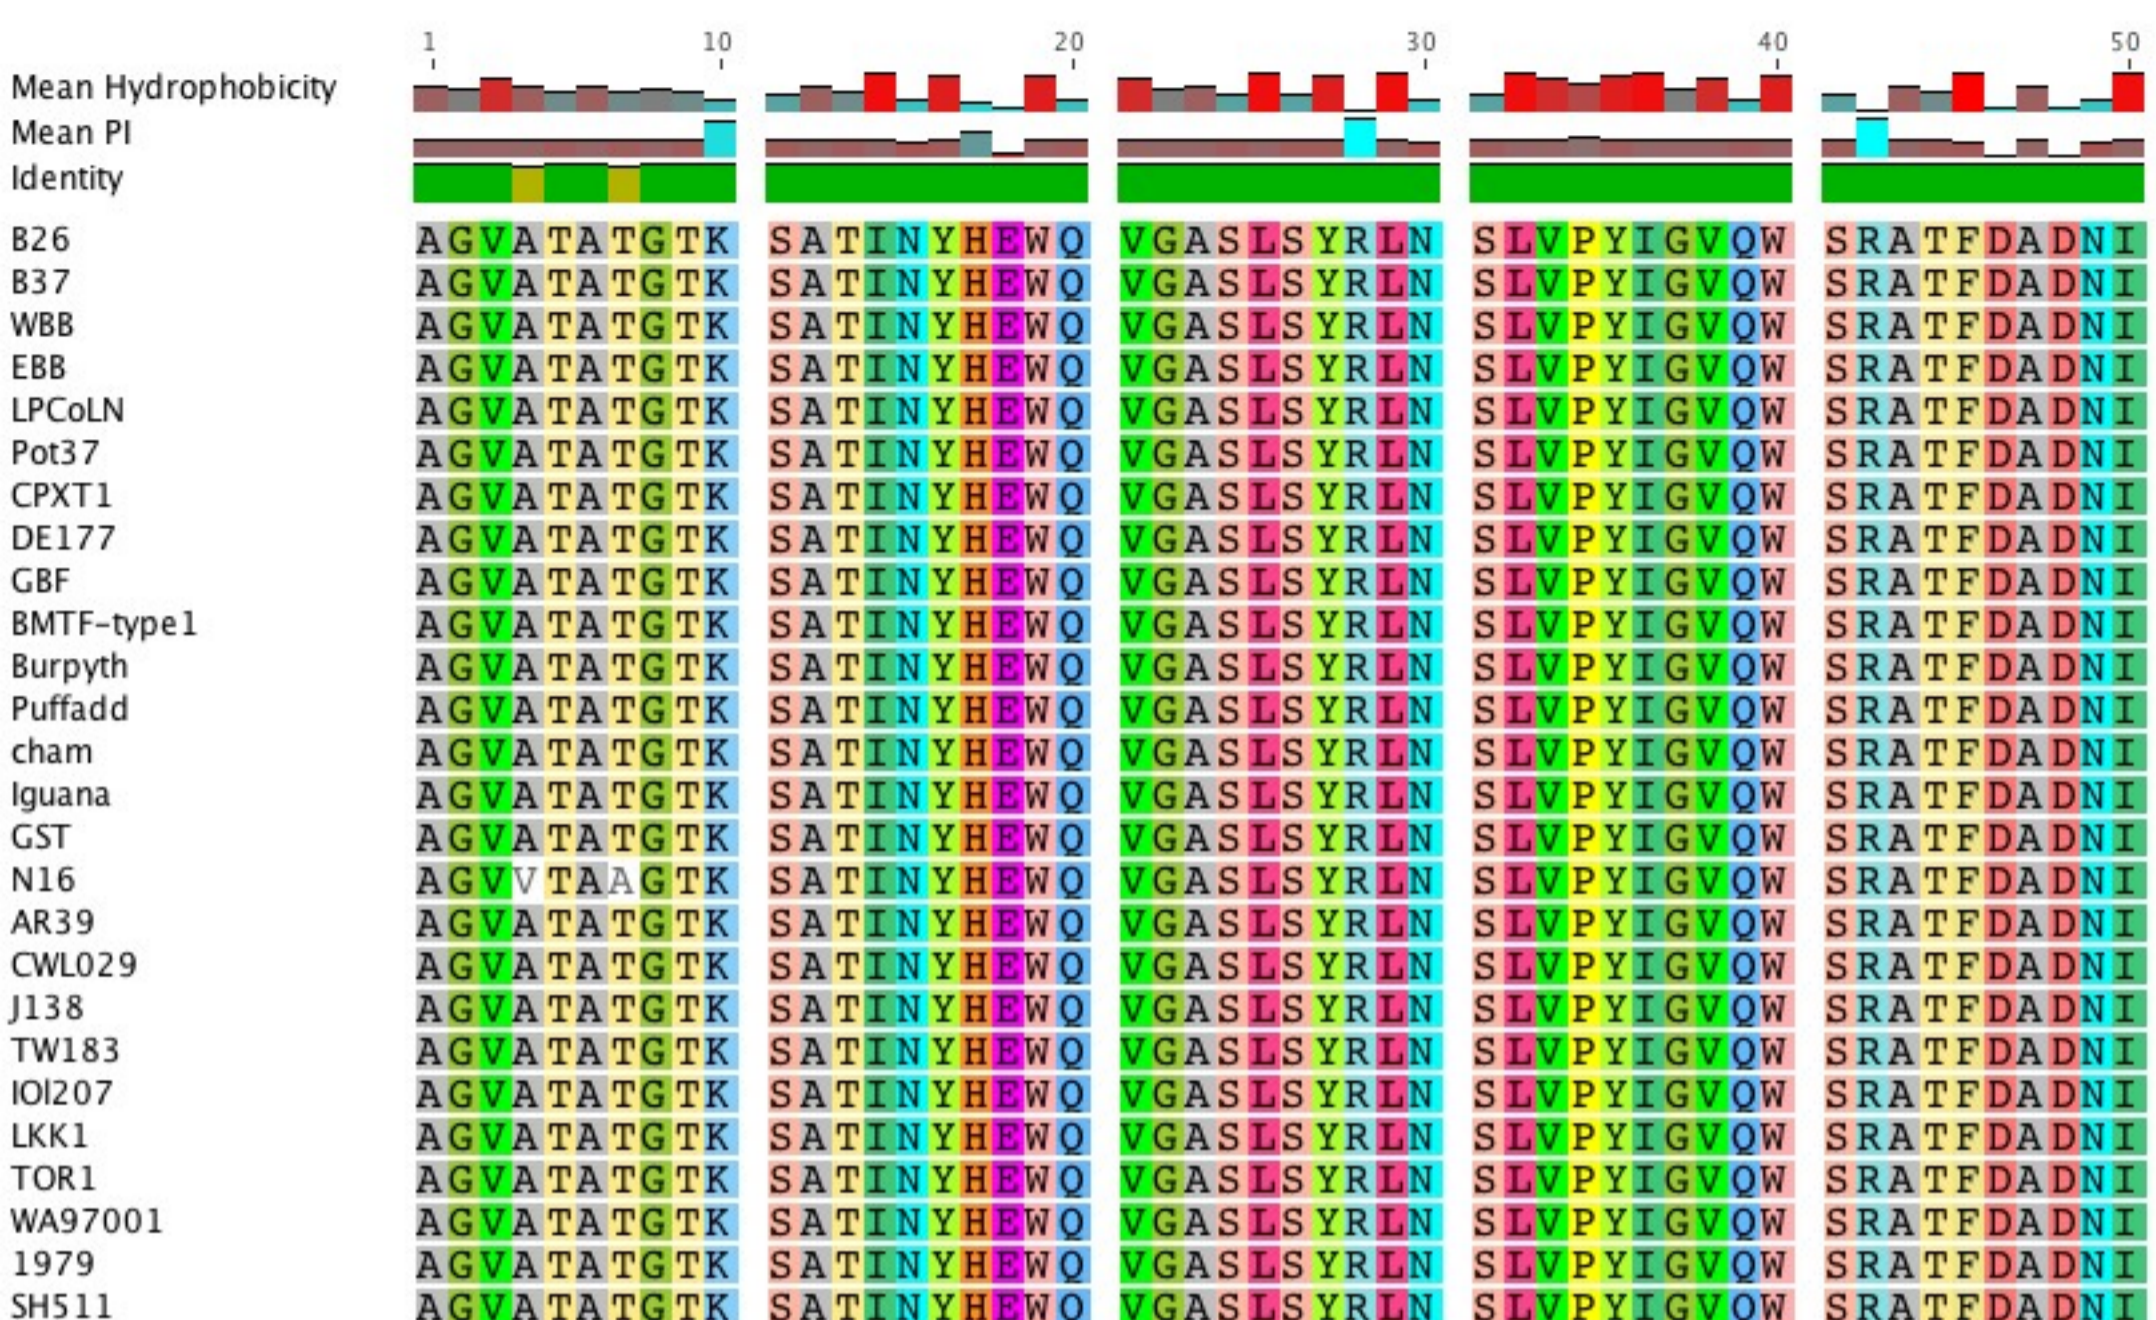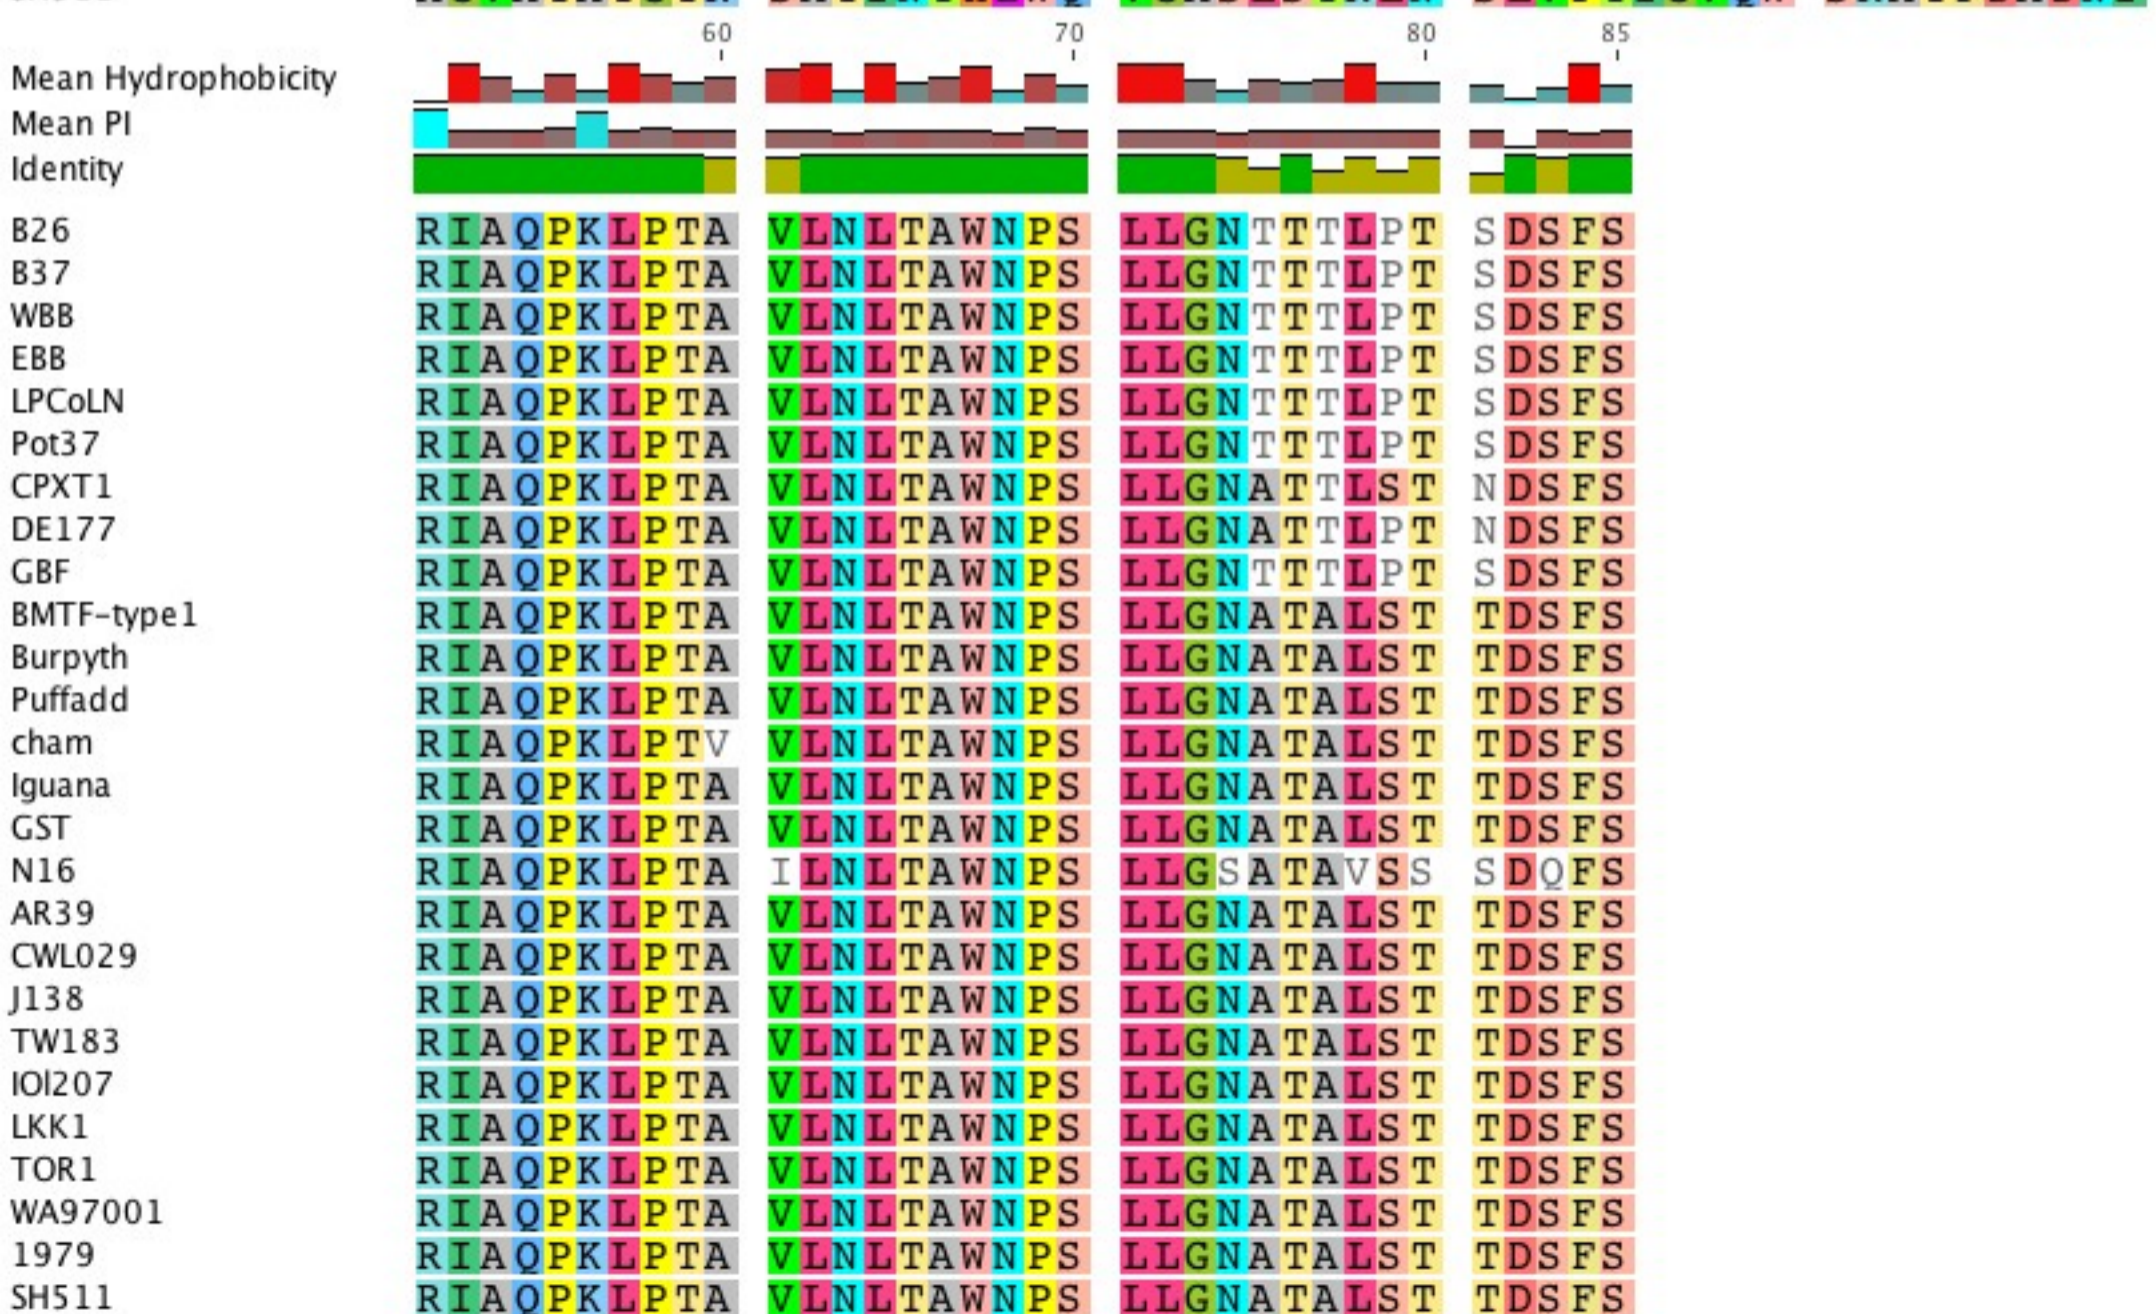

Supplement: ppat.1000903.s008.pdf [file ppat.1000903.s008.pdf]
