# Supplementary material for: Chlamydia pneumoniae Is Genetically Diverse in Animals and Appears to Have Crossed the Host Barrier to Humans on (At Least) Two Occasions
Source: PubMed Central journal article supplement (PMC2873915; doi:10.1371/journal.ppat.1000903), 2010-05-20

| Identity | 1           | 10          | 20         | 30         | 40          | 50          | 60         |            |            |
|----------|-------------|-------------|------------|------------|-------------|-------------|------------|------------|------------|
| B26      | GATCGTCGCT  | AGTGC       | A          | GAAA       | CAAAGCCAGC  | ACCTG TTCCT | G          | TGACAGCGA  | AGAAGGTTAG |
| LPCoLN   | GATCGTCGCT  | AGTGC       | A          | GAAA       | CAAAGCCAGC  | ACCTG TTCCT | G          | TGACAGCGA  | AGAAGGTTAG |
| GBF      | GATCGTCGCT  | AGTGC       | A          | GAAA       | CAAAGCCAGC  | ACCTG TTCCT | G          | TGACAGCGA  | AGAAGGTTAG |
| DE177    | GATCGTCGCT  | AGTGC       | A          | GAAA       | CAAAGCCAGC  | ACCTG TTCCT | G          | TGACAGCGA  | AGAAGGTTAG |
| N16      | GATCGTCGCT  | AGTGC       | CGGAAA     | CAAAGCCAGC | ACCTG TTCCT | ATGACAGCGA  |            | AGAAGGTTAG |            |
| AR39     | GATCGTCGCT  | AGTGC       | CGGAAA     | CAAAGCCAGC | ACCTG TTCCT | ATGACAGCGA  |            | AGAAGGTTAG |            |
| CWL029   | GATCGTCGCT  | AGTGC       | CGGAAA     | CAAAGCCAGC | ACCTG TTCCT | ATGACAGCGA  |            | AGAAGGTTAG |            |
| J138     | GATCGTCGCT  | AGTGC       | CGGAAA     | CAAAGCCAGC | ACCTG TTCCT | ATGACAGCGA  |            | AGAAGGTTAG |            |
| TW183    | GATCGTCGCT  | AGTGC       | CGGAAA     | CAAAGCCAGC | ACCTG TTCCT | ATGACAGCGA  |            | AGAAGGTTAG |            |
| IOL207   | GATCGTCGCT  | AGTGC       | CGGAAA     | CAAAGCCAGC | ACCTG TTCCT | ATGACAGCGA  |            | AGAAGGTTAG |            |
| LKK1     | GATCGTCGCT  | AGTGC       | CGGAAA     | CAAAGCCAGC | ACCTG TTCCT | ATGACAGCGA  |            | AGAAGGTTAG |            |
| Identity | 70          | 80          | 90         | 100        | 110         | 120         |            |            |            |
| B26      | ACTTG TCCGT | A           | AAA        | TAAAC      | AACCAGTTGA  | ACAAAAAAGC  | CGTGGTGCTT | TTTGTGATAA |            |
| LPCoLN   | ACTTG TCCGT | A           | AAA        | TAAAC      | AACCAGTTGA  | ACAAAAAAGC  | CGTGGTGCTT | TTTGTGATAA |            |
| GBF      | ACTTG TCCGT | A           | AAA        | TAAAC      | AACCAGTTGA  | ACAAAAAAGC  | CGTGGTGCTT | TTTGTGATAA |            |
| DE177    | ACTTG TCCGT | A           | AAA        | TAAAC      | AACCAGTTGA  | ACAAAAAAGC  | CGTGGTGCTT | TTTGTGATAA |            |
| N16      | ACTTG TCCGT | AGAAA       | TAAAC      | AACCAGTTGA | ACAAAAAAGC  | CGTGGTGCTT  | TTTGTGATAA |            |            |
| AR39     | ACTTG TCCGT | AGAAA       | TAAAC      | AACCAGTTGA | ACAAAAAAGC  | CGTGGTGCTT  | TTTGTGATAA |            |            |
| CWL029   | ACTTG TCCGT | AGAAA       | TAAAC      | AACCAGTTGA | ACAAAAAAGC  | CGTGGTGCTT  | TTTGTGATAA |            |            |
| J138     | ACTTG TCCGT | AGAAA       | TAAAC      | AACCAGTTGA | ACAAAAAAGC  | CGTGGTGCTT  | TTTGTGATAA |            |            |
| TW183    | ACTTG TCCGT | AGAAA       | TAAAC      | AACCAGTTGA | ACAAAAAAGC  | CGTGGTGCTT  | TTTGTGATAA |            |            |
| IOL207   | ACTTG TCCGT | AGAAA       | TAAAC      | AACCAGTTGA | ACAAAAAAGC  | CGTGGTGCTT  | TTTGTGATAA |            |            |
| LKK1     | ACTTG TCCGT | AGAAA       | TAAAC      | AACCAGTTGA | ACAAAAAAGC  | CGTGGTGCTT  | TTTGTGATAA |            |            |
| Identity | 130         | 140         | 150        | 160        | 170         | 180         |            |            |            |
| B26      | AGAA TTTTAT | CCCTG TGAAG | AGGGACGATG | TCAACCTGTA | GAGGCTCAGC  | AAGAGTCTTG  |            |            |            |
| LPCoLN   | AGAA TTTTAT | CCCTG TGAAG | AGGGACGATG | TCAACCTGTA | GAGGCTCAGC  | AAGAGTCTTG  |            |            |            |
| GBF      | AGAA TTTTAT | CCCTG TGAAG | AGGGACGATG | TCAACCTGTA | GAGGCTCAGC  | AAGAGTCTTG  |            |            |            |
| DE177    | AGAA TTTTAT | CCCTG TGAAG | AGGGACGATG | TCAACCTGTA | GAGGCTCAGC  | AAGAGTCTTG  |            |            |            |
| N16      | AGAA TTTTAT | CCCTG TGAAG | AGGGACGATG | TCAACCTGTA | GAGGCTCAGC  | AAGAGTCTTG  |            |            |            |
| AR39     | AGAA TTTTAT | CCCTG TGAAG | AGGGACGATG | TCAACCTGTA | GAGGCTCAGC  | AAGAGTCTTG  |            |            |            |
| CWL029   | AGAA TTTTAT | CCCTG TGAAG | AGGGACGATG | TCAACCTGTA | GAGGCTCAGC  | AAGAGTCTTG  |            |            |            |
| J138     | AGAA TTTTAT | CCCTG TGAAG | AGGGACGATG | TCAACCTGTA | GAGGCTCAGC  | AAGAGTCTTG  |            |            |            |
| TW183    | AGAA TTTTAT | CCCTG TGAAG | AGGGACGATG | TCAACCTGTA | GAGGCTCAGC  | AAGAGTCTTG  |            |            |            |
| IOL207   | AGAA TTTTAT | CCCTG TGAAG | AGGGACGATG | TCAACCTGTA | GAGGCTCAGC  | AAGAGTCTTG  |            |            |            |
| LKK1     | AGAA TTTTAT | CCCTG TGAAG | AGGGACGATG | TCAACCTGTA | GAGGCTCAGC  | AAGAGTCTTG  |            |            |            |
| Identity | 190         | 200         | 210        | 220        | 230         | 240         |            |            |            |
| B26      | CTACGGAAGA  | TTGTA TTCTG | TAAAAGTAAA | CGATGATTGC | AACGTAGAAA  | TTTGCCAGTC  |            |            |            |
| LPCoLN   | CTACGGAAGA  | TTGTA TTCTG | TAAAAGTAAA | CGATGATTGC | AACGTAGAAA  | TTTGCCAGTC  |            |            |            |
| GBF      | CTACGGAAGA  | TTGTA TTCTG | TAAAAGTAAA | CGATGATTGC | AACGTAGAAA  | TTTGCCAGTC  |            |            |            |
| DE177    | CTACGGAAGA  | TTGTA TTCTG | TAAAAGTAAA | CGATGATTGC | AACGTAGAAA  | TTTGCCAGTC  |            |            |            |
| N16      | CTACGGAAGA  | TTGTA TTCTG | TAAAAGTAAA | CGATGATTGC | AACGTAGAAA  | TTTGCCAGTC  |            |            |            |
| AR39     | CTACGGAAGA  | TTGTA TTCTG | TAAAAGTAAA | CGATGATTGC | AACGTAGAAA  | TTTGCCAGTC  |            |            |            |
| CWL029   | CTACGGAAGA  | TTGTA TTCTG | TAAAAGTAAA | CGATGATTGC | AACGTAGAAA  | TTTGCCAGTC  |            |            |            |
| J138     | CTACGGAAGA  | TTGTA TTCTG | TAAAAGTAAA | CGATGATTGC | AACGTAGAAA  | TTTGCCAGTC  |            |            |            |
| TW183    | CTACGGAAGA  | TTGTA TTCTG | TAAAAGTAAA | CGATGATTGC | AACGTAGAAA  | TTTGCCAGTC  |            |            |            |
| IOL207   | CTACGGAAGA  | TTGTA TTCTG | TAAAAGTAAA | CGATGATTGC | AACGTAGAAA  | TTTGCCAGTC  |            |            |            |
| LKK1     | CTACGGAAGA  | TTGTA TTCTG | TAAAAGTAAA | CGATGATTGC | AACGTAGAAA  | TTTGCCAGTC  |            |            |            |

|          | 250        | 260        | 270        | 280                  | 290        | 300        |
|----------|------------|------------|------------|----------------------|------------|------------|
| Identity |            |            |            |                      |            |            |
| B26      | CGTTCCAGAA | TACGCTACTG | TAGGATCTCC | TTACCCTATT           | GAAATCCTTG | CTATAGGCAA |
| LPCoLN   | CGTTCCAGAA | TACGCTACTG | TAGGATCTCC | TTACCCTATT           | GAAATCCTTG | CTATAGGCAA |
| GBF      | CGTTCCAGAA | TACGCTACTG | TAGGATCTCC | TTACCCTATT           | GAAATCCTTG | CTATAGGCAA |
| DE177    | CGTTCCAGAA | TACGCTACTG | TAGGATCTCC | TTACCCTATT           | GAAATCCTTG | CTATAGGCAA |
| N16      | CGTTCCAGAA | TACGCTACTG | TAGGATCTCC | TTA <b>T</b> CCCTATT | GAAATCCTTG | CTATAGGCAA |
| AR39     | CGTTCCAGAA | TACGCTACTG | TAGGATCTCC | TTACCCTATT           | GAAATCCTTG | CTATAGGCAA |
| CWL029   | CGTTCCAGAA | TACGCTACTG | TAGGATCTCC | TTACCCTATT           | GAAATCCTTG | CTATAGGCAA |
| J138     | CGTTCCAGAA | TACGCTACTG | TAGGATCTCC | TTACCCTATT           | GAAATCCTTG | CTATAGGCAA |
| TW183    | CGTTCCAGAA | TACGCTACTG | TAGGATCTCC | TTACCCTATT           | GAAATCCTTG | CTATAGGCAA |
| IOL207   | CGTTCCAGAA | TACGCTACTG | TAGGATCTCC | TTACCCTATT           | GAAATCCTTG | CTATAGGCAA |
| LKK1     | CGTTCCAGAA | TACGCTACTG | TAGGATCTCC | TTACCCTATT           | GAAATCCTTG | CTATAGGCAA |

|          | 310        | 320        | 330        | 340        | 350        | 360        |
|----------|------------|------------|------------|------------|------------|------------|
| Identity |            |            |            |            |            |            |
| B26      | AAAAGATTGT | GTTGATGTTG | TGATTACACA | ACAGCTACCT | TGCGAAGCTG | AATTCGTAAG |
| LPCoLN   | AAAAGATTGT | GTTGATGTTG | TGATTACACA | ACAGCTACCT | TGCGAAGCTG | AATTCGTAAG |
| GBF      | AAAAGATTGT | GTTGATGTTG | TGATTACACA | ACAGCTACCT | TGCGAAGCTG | AATTCGTAAG |
| DE177    | AAAAGATTGT | GTTGATGTTG | TGATTACACA | ACAGCTACCT | TGCGAAGCTG | AATTCGTAAG |
| N16      | AAAAGATTGT | GTTGATGTTG | TGATTACACA | ACAGCTACCT | TGCGAAGCTG | AATTCGTAAG |
| AR39     | AAAAGATTGT | GTTGATGTTG | TGATTACACA | ACAGCTACCT | TGCGAAGCTG | AATTCGTAAG |
| CWL029   | AAAAGATTGT | GTTGATGTTG | TGATTACACA | ACAGCTACCT | TGCGAAGCTG | AATTCGTAAG |
| J138     | AAAAGATTGT | GTTGATGTTG | TGATTACACA | ACAGCTACCT | TGCGAAGCTG | AATTCGTAAG |
| TW183    | AAAAGATTGT | GTTGATGTTG | TGATTACACA | ACAGCTACCT | TGCGAAGCTG | AATTCGTAAG |
| IOL207   | AAAAGATTGT | GTTGATGTTG | TGATTACACA | ACAGCTACCT | TGCGAAGCTG | AATTCGTAAG |
| LKK1     | AAAAGATTGT | GTTGATGTTG | TGATTACACA | ACAGCTACCT | TGCGAAGCTG | AATTCGTAAG |

|          | 370        | 380                 | 386    |
|----------|------------|---------------------|--------|
| Identity |            |                     |        |
| B26      | CAGTGATCCA | GAAACAAC <b>C</b> C | CTACAA |
| LPCoLN   | CAGTGATCCA | GAAACAAC <b>C</b> C | CTACAA |
| GBF      | CAGTGATCCA | GAAACAAC <b>C</b> C | CTACAA |
| DE177    | CAGTGATCCA | GAAACAAC <b>T</b> C | CTACAA |
| N16      | CAGTGATCCA | GAAACAAC <b>T</b> C | CTACAA |
| AR39     | CAGTGATCCA | GAAACAAC <b>T</b> C | CTACAA |
| CWL029   | CAGTGATCCA | GAAACAAC <b>T</b> C | CTACAA |
| J138     | CAGTGATCCA | GAAACAAC <b>T</b> C | CTACAA |
| TW183    | CAGTGATCCA | GAAACAAC <b>T</b> C | CTACAA |
| IOL207   | CAGTGATCCA | GAAACAAC <b>T</b> C | CTACAA |
| LKK1     | CAGTGATCCA | GAAACAAC <b>T</b> C | CTACAA |

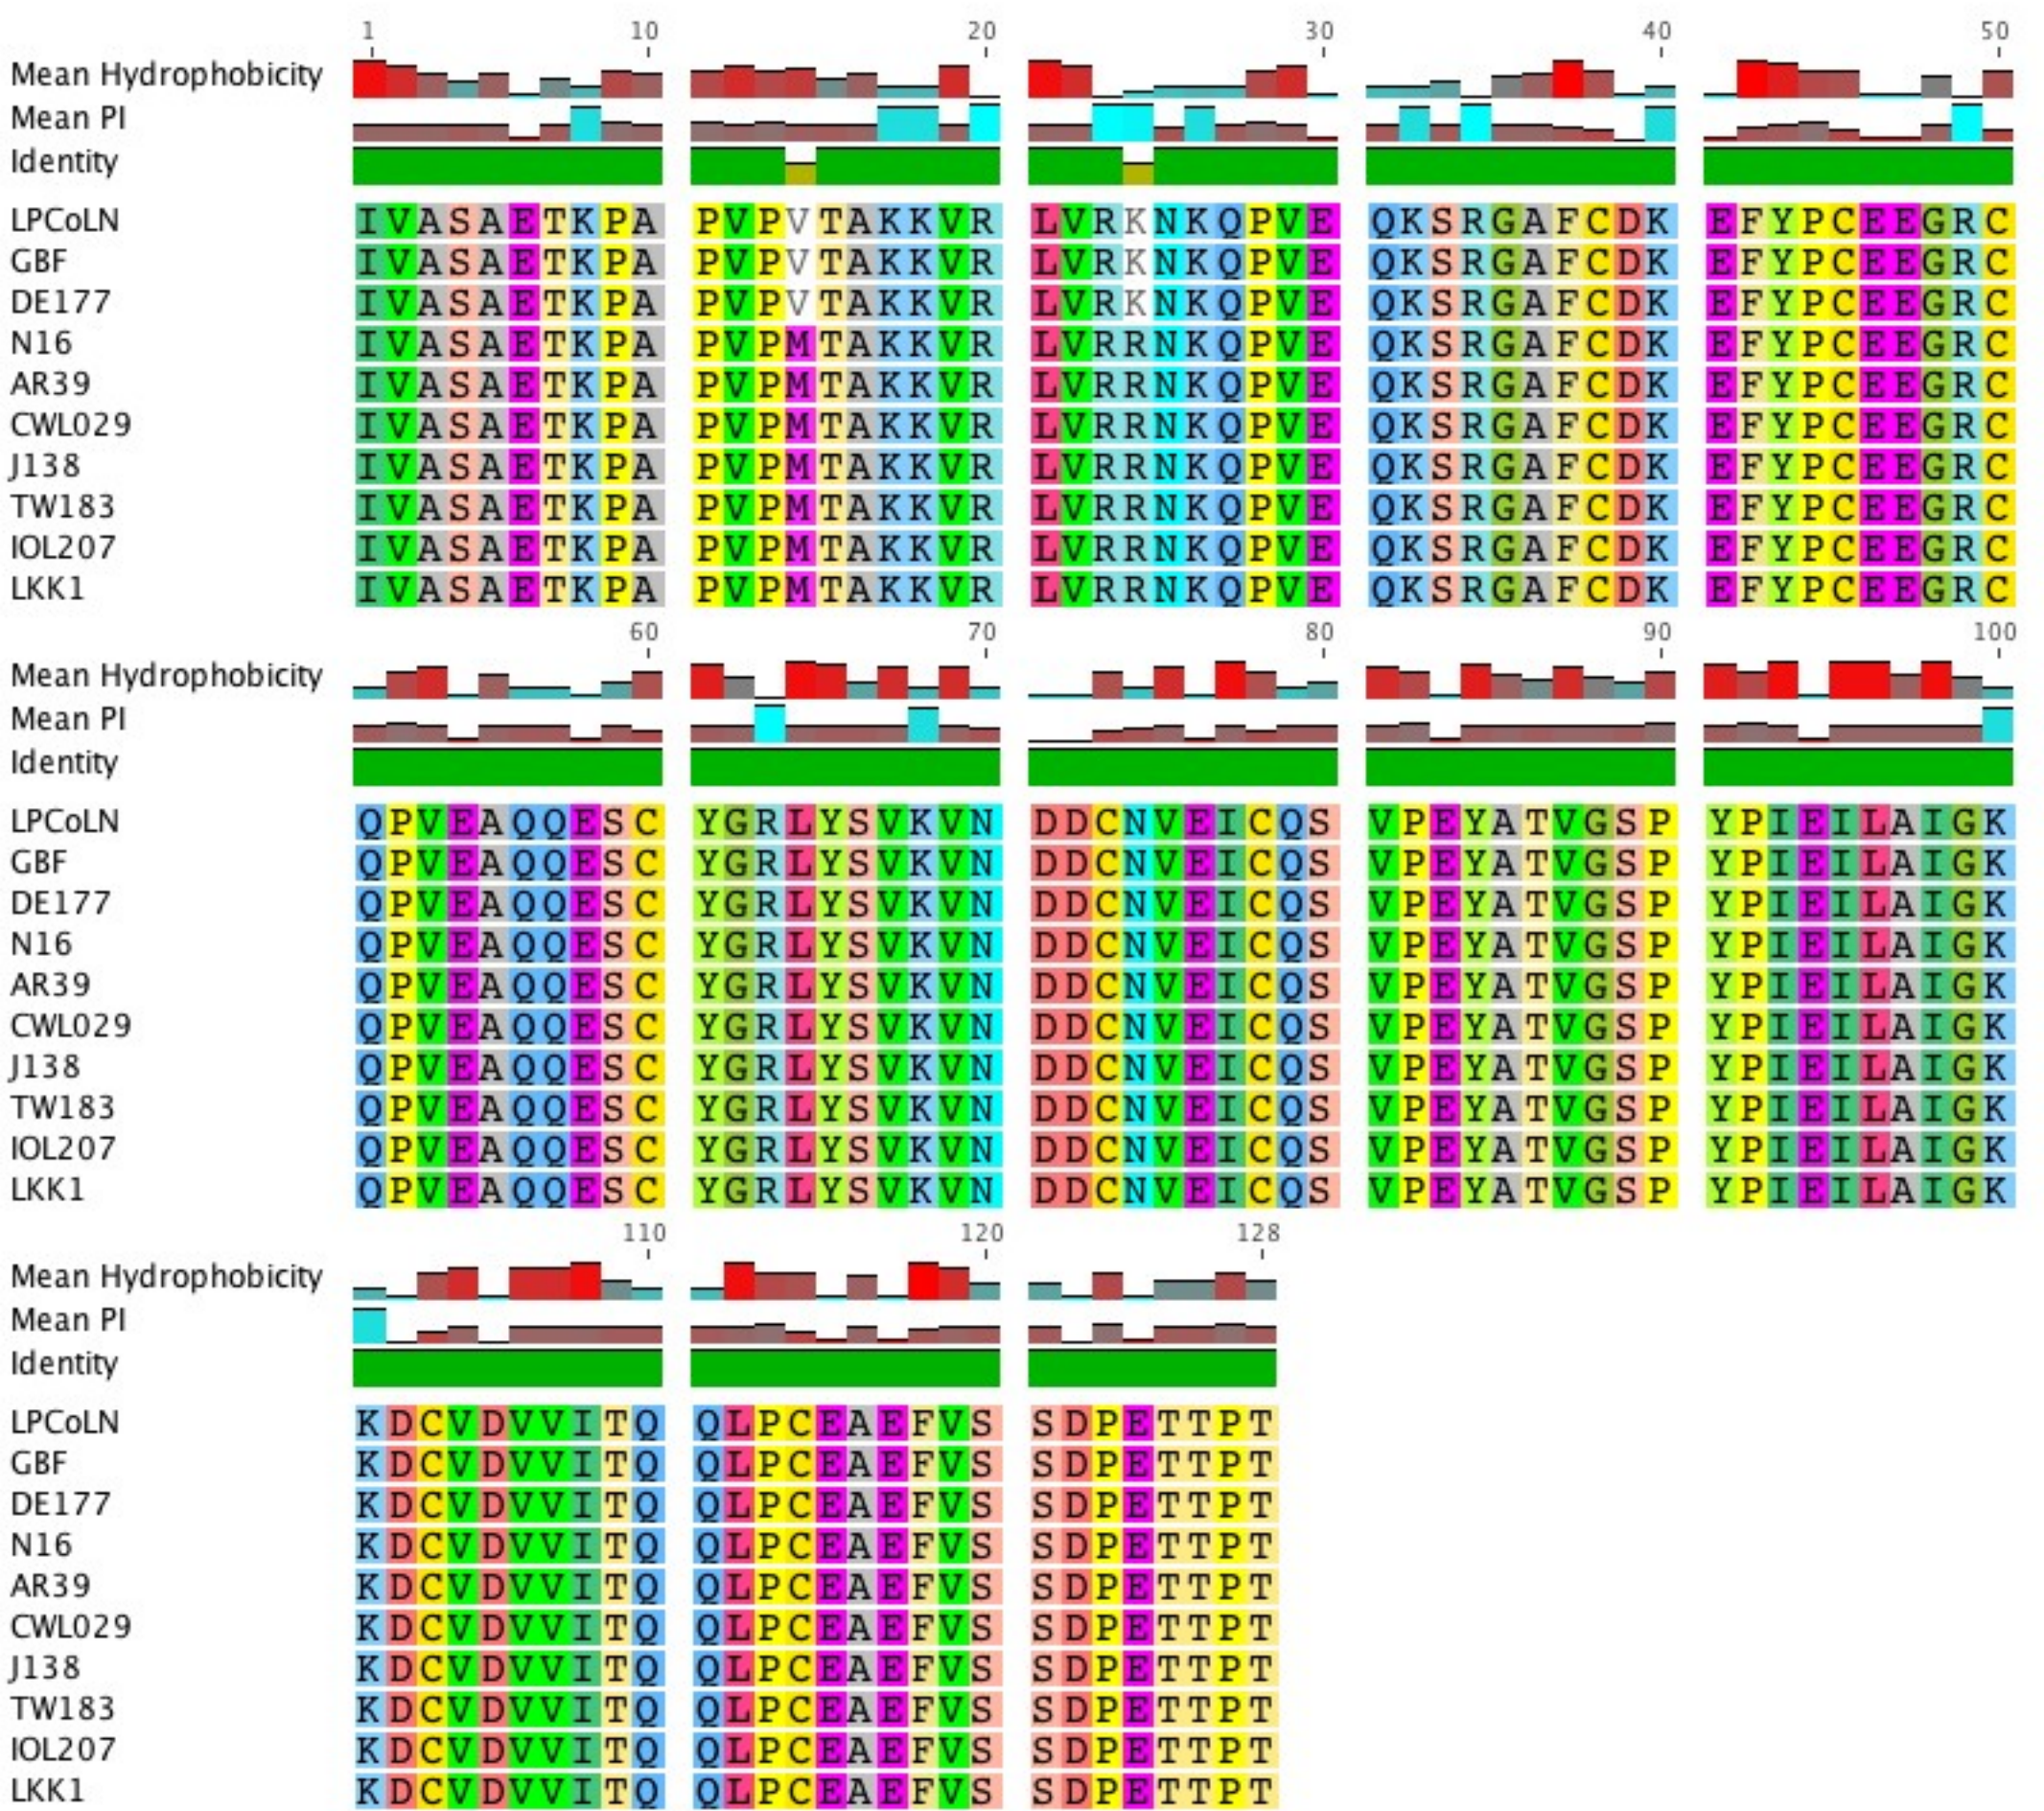

Supplement: ppat.1000903.s009.pdf [file ppat.1000903.s009.pdf]
