# Supplementary material for: Chlamydia pneumoniae Is Genetically Diverse in Animals and Appears to Have Crossed the Host Barrier to Humans on (At Least) Two Occasions
Source: PLoS Pathog. 2010 May 20;6(5):e1000903. doi: 10.1371/journal.ppat.1000903 (PMC2873915; doi:10.1371/journal.ppat.1000903)

|          | 1                                                                               | 10                                                                              | 20                                                                               | 30                                                                                | 40                                                                                | 50 |
|----------|---------------------------------------------------------------------------------|---------------------------------------------------------------------------------|----------------------------------------------------------------------------------|-----------------------------------------------------------------------------------|-----------------------------------------------------------------------------------|----|
| Identity | 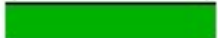 | 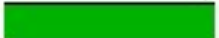 | 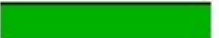 | 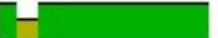 | 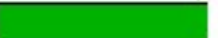 |    |
| B26      | TGTTTATATT                                                                      | GAAAAGTTTA                                                                      | TAGAAAATCC                                                                       | ACGGCATTTA                                                                        | GAAATCCAAG                                                                        |    |
| B37      | TGTTTATATT                                                                      | GAAAAGTTTA                                                                      | TAGAAAATCC                                                                       | ACGGCATTTA                                                                        | GAAATCCAAG                                                                        |    |
| EBB      | TGTTTATATT                                                                      | GAAAAGTTTA                                                                      | TAGAAAATCC                                                                       | ACGGCATTTA                                                                        | GAAATCCAAG                                                                        |    |
| LPCoLN   | TGTTTATATT                                                                      | GAAAAGTTTA                                                                      | TAGAAAATCC                                                                       | ACGGCATTTA                                                                        | GAAATCCAAG                                                                        |    |
| Pot37    | TGTTTATATT                                                                      | GAAAAGTTTA                                                                      | TAGAAAATCC                                                                       | ACGGCATTTA                                                                        | GAAATCCAAG                                                                        |    |
| 2040.3   | TGTTTATATT                                                                      | GAAAAGTTTA                                                                      | TAGAAAATCC                                                                       | ACGGCATTTA                                                                        | GAAATCCAAG                                                                        |    |
| GBF      | TGTTTATATT                                                                      | GAAAAGTTTA                                                                      | TAGAAAATCC                                                                       | ACGGCATTTA                                                                        | GAAATCCAAG                                                                        |    |
| DE177    | TGTTTATATT                                                                      | GAAAAGTTTA                                                                      | TAGAAAATCC                                                                       | ACGGCATTTA                                                                        | GAAATCCAAG                                                                        |    |
| N16      | TGTTTATATT                                                                      | GAAAAGTTTA                                                                      | TAGAAAATCC                                                                       | ACGGCATTTA                                                                        | GAAATCCAAG                                                                        |    |
| AR39     | TGTTTATATT                                                                      | GAAAAGTTTA                                                                      | TAGAAAATCC                                                                       | A <sup>AG</sup> GGCATTTA                                                          | GAAATCCAAG                                                                        |    |
| CWL029   | TGTTTATATT                                                                      | GAAAAGTTTA                                                                      | TAGAAAATCC                                                                       | A <sup>AG</sup> GGCATTTA                                                          | GAAATCCAAG                                                                        |    |
| J138     | TGTTTATATT                                                                      | GAAAAGTTTA                                                                      | TAGAAAATCC                                                                       | A <sup>AG</sup> GGCATTTA                                                          | GAAATCCAAG                                                                        |    |
| TW183    | TGTTTATATT                                                                      | GAAAAGTTTA                                                                      | TAGAAAATCC                                                                       | A <sup>AG</sup> GGCATTTA                                                          | GAAATCCAAG                                                                        |    |
| A03      | TGTTTATATT                                                                      | GAAAAGTTTA                                                                      | TAGAAAATCC                                                                       | A <sup>AG</sup> GGCATTTA                                                          | GAAATCCAAG                                                                        |    |
| 1979     | TGTTTATATT                                                                      | GAAAAGTTTA                                                                      | TAGAAAATCC                                                                       | ACGGCATTTA                                                                        | GAAATCCAAG                                                                        |    |
| SH511    | TGTTTATATT                                                                      | GAAAAGTTTA                                                                      | TAGAAAATCC                                                                       | ACGGCATTTA                                                                        | GAAATCCAAG                                                                        |    |

|          | 60                                                                                | 70                                                                                | 80                                                                                 | 90                                                                                  | 100                                                                                 |
|----------|-----------------------------------------------------------------------------------|-----------------------------------------------------------------------------------|------------------------------------------------------------------------------------|-------------------------------------------------------------------------------------|-------------------------------------------------------------------------------------|
| Identity | 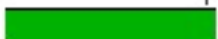 | 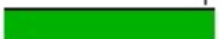 | 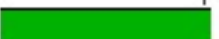 | 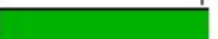 | 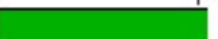 |
| B26      | TCATTGGGGA                                                                        | TACCCATGGA                                                                        | AATTATGTGC                                                                         | ATTTAGGAGA                                                                          | AAGAGACTGC                                                                          |
| B37      | TCATTGGGGA                                                                        | TACCCATGGA                                                                        | AATTATGTGC                                                                         | ATTTAGGAGA                                                                          | AAGAGACTGC                                                                          |
| EBB      | TCATTGGGGA                                                                        | TACCCATGGA                                                                        | AATTATGTGC                                                                         | ATTTAGGAGA                                                                          | AAGAGACTGC                                                                          |
| LPCoLN   | TCATTGGGGA                                                                        | TACCCATGGA                                                                        | AATTATGTGC                                                                         | ATTTAGGAGA                                                                          | AAGAGACTGC                                                                          |
| Pot37    | TCATTGGGGA                                                                        | TACCCATGGA                                                                        | AATTATGTGC                                                                         | ATTTAGGAGA                                                                          | AAGAGACTGC                                                                          |
| 2040.3   | TCATTGGGGA                                                                        | TACCCATGGA                                                                        | AATTATGTGC                                                                         | ATTTAGGAGA                                                                          | AAGAGACTGC                                                                          |
| GBF      | TCATTGGGGA                                                                        | TACCCATGGA                                                                        | AATTATGTGC                                                                         | ATTTAGGAGA                                                                          | AAGAGACTGC                                                                          |
| DE177    | TCATTGGGGA                                                                        | TACCCATGGA                                                                        | AATTATGTGC                                                                         | ATTTAGGAGA                                                                          | AAGAGACTGC                                                                          |
| N16      | TCATTGGGGA                                                                        | TACCCATGGA                                                                        | AATTATGTGC                                                                         | ATTTAGGAGA                                                                          | AAGAGACTGC                                                                          |
| AR39     | TCATTGGGGA                                                                        | TACCCATGGA                                                                        | AATTATGTGC                                                                         | ATTTAGGAGA                                                                          | AAGAGACTGC                                                                          |
| CWL029   | TCATTGGGGA                                                                        | TACCCATGGA                                                                        | AATTATGTGC                                                                         | ATTTAGGAGA                                                                          | AAGAGACTGC                                                                          |
| J138     | TCATTGGGGA                                                                        | TACCCATGGA                                                                        | AATTATGTGC                                                                         | ATTTAGGAGA                                                                          | AAGAGACTGC                                                                          |
| TW183    | TCATTGGGGA                                                                        | TACCCATGGA                                                                        | AATTATGTGC                                                                         | ATTTAGGAGA                                                                          | AAGAGACTGC                                                                          |
| A03      | TCATTGGGGA                                                                        | TACCCATGGA                                                                        | AATTATGTGC                                                                         | ATTTAGGAGA                                                                          | AAGAGACTGC                                                                          |
| 1979     | TCATTGGGGA                                                                        | TACCCATGGA                                                                        | AATTATGTGC                                                                         | ATTTAGGAGA                                                                          | AAGAGACTGC                                                                          |
| SH511    | TCATTGGGGA                                                                        | TACCCATGGA                                                                        | AATTATGTGC                                                                         | ATTTAGGAGA                                                                          | AAGAGACTGC                                                                          |

|          | 110                                                                                 | 120                                                                                 | 130                                                                                  | 140                                                                                   | 150                                                                                   |
|----------|-------------------------------------------------------------------------------------|-------------------------------------------------------------------------------------|--------------------------------------------------------------------------------------|---------------------------------------------------------------------------------------|---------------------------------------------------------------------------------------|
| Identity | 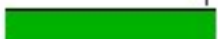 | 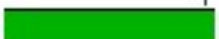 | 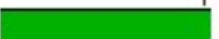 | 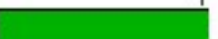 | 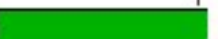 |
| B26      | ACCATTCAAC                                                                          | GGCGACGTCA                                                                          | AAAGTTGATT                                                                           | GAAGAGACTC                                                                            | CTAGTCCCAT                                                                            |
| B37      | ACCATTCAAC                                                                          | GGCGACGTCA                                                                          | AAAGTTGATT                                                                           | GAAGAGACTC                                                                            | CTAGTCCCAT                                                                            |
| EBB      | ACCATTCAAC                                                                          | GGCGACGTCA                                                                          | AAAGTTGATT                                                                           | GAAGAGACTC                                                                            | CTAGTCCCAT                                                                            |
| LPCoLN   | ACCATTCAAC                                                                          | GGCGACGTCA                                                                          | AAAGTTGATT                                                                           | GAAGAGACTC                                                                            | CTAGTCCCAT                                                                            |
| Pot37    | ACCATTCAAC                                                                          | GGCGACGTCA                                                                          | AAAGTTGATT                                                                           | GAAGAGACTC                                                                            | CTAGTCCCAT                                                                            |
| 2040.3   | ACCATTCAAC                                                                          | GGCGACGTCA                                                                          | AAAGTTGATT                                                                           | GAAGAGACTC                                                                            | CTAGTCCCAT                                                                            |
| GBF      | ACCATTCAAC                                                                          | GGCGACGTCA                                                                          | AAAGTTGATT                                                                           | GAAGAGACTC                                                                            | CTAGTCCCAT                                                                            |
| DE177    | ACCATTCAAC                                                                          | GGCGACGTCA                                                                          | AAAGTTGATT                                                                           | GAAGAGACTC                                                                            | CTAGTCCCAT                                                                            |
| N16      | ACCATTCAAC                                                                          | GGCGACGTCA                                                                          | AAAGTTGATT                                                                           | GAAGAGACTC                                                                            | CTAGTCCCAT                                                                            |
| AR39     | ACCATTCAAC                                                                          | GGCGACGTCA                                                                          | AAAGTTGATT                                                                           | GAAGAGACTC                                                                            | CTAGTCCCAT                                                                            |
| CWL029   | ACCATTCAAC                                                                          | GGCGACGTCA                                                                          | AAAGTTGATT                                                                           | GAAGAGACTC                                                                            | CTAGTCCCAT                                                                            |
| J138     | ACCATTCAAC                                                                          | GGCGACGTCA                                                                          | AAAGTTGATT                                                                           | GAAGAGACTC                                                                            | CTAGTCCCAT                                                                            |
| TW183    | ACCATTCAAC                                                                          | GGCGACGTCA                                                                          | AAAGTTGATT                                                                           | GAAGAGACTC                                                                            | CTAGTCCCAT                                                                            |
| A03      | ACCATTCAAC                                                                          | GGCGACGTCA                                                                          | AAAGTTGATT                                                                           | GAAGAGACTC                                                                            | CTAGTCCCAT                                                                            |
| 1979     | ACCATTCAAC                                                                          | GGCGACGTCA                                                                          | AAAGTTGATT                                                                           | GAAGAGACTC                                                                            | CTAGTCCCAT                                                                            |
| SH511    | ACCATTCAAC                                                                          | GGCGACGTCA                                                                          | AAAGTTGATT                                                                           | GAAGAGACTC                                                                            | CTAGTCCCAT                                                                            |

| Identity | 160        | 170        | 180        | 190        | 200        |
|----------|------------|------------|------------|------------|------------|
| B26      | TCTCAATGCG | GAAATCCGAG | CCAAAGTAGG | AAAAGTTGCT | GTAGATCTAG |
| B37      | TCTCAATGCG | GAAATCCGAG | CCAAAGTAGG | AAAAGTTGCT | GTAGATCTAG |
| EBB      | TCTCAATGCG | GAAATCCGAG | CCAAAGTAGG | AAAAGTTGCT | GTAGATCTAG |
| LPCoLN   | TCTCAATGCG | GAAATCCGAG | CCAAAGTAGG | AAAAGTTGCT | GTAGATCTAG |
| Pot37    | TCTCAATGCG | GAAATCCGAG | CCAAAGTAGG | AAAAGTTGCT | GTAGATCTAG |
| 2040.3   | TCTCAATGCG | GAAATCCGAG | CCAAAGTAGG | AAAAGTTGCT | GTAGATCTAG |
| GBF      | TCTCAATGCG | GAAATCCGAG | CCAAAGTAGG | AAAAGTTGCT | GTAGATCTAG |
| DE177    | TCTCAATGCG | GAAATCCGAG | CCAAAGTAGG | AAAAGTTGCT | GTAGATCTAG |
| N16      | TCTCAATGCG | GAAATCCGAG | CCAAAGTAGG | AAAATTGCT  | GTAGATCTAG |
| AR39     | TCTCAATGCG | GAAATCCGAG | CCAAAGTAGG | AAAATTGCT  | GTAGATCTAG |
| CWL029   | TCTCAATGCG | GAAATCCGAG | CCAAAGTAGG | AAAAGTTGCT | GTAGATCTAG |
| J138     | TCTCAATGCG | GAAATCCGAG | CCAAAGTAGG | AAAATTGCT  | GTAGATCTAG |
| TW183    | TCTCAATGCG | GAAATCCGAG | CCAAAGTAGG | AAAAGTTGCT | GTAGATCTAG |
| A03      | TCTCAATGCG | GAAATCCGAG | CCAAAGTAGG | AAAAGTTGCT | GTAGATCTAG |
| 1979     | TCTCAATGCG | GAAATCCGAG | CCAAAGTAGG | AAAAGTTGCT | GTAGATCTAG |
| SH511    | TCTCAATGCG | GAAATCCGAG | CCAAAGTAGG | AAAAGTTGCT | GTAGATCTAG |

| Identity | 210        | 220        | 230        | 240        | 250        |
|----------|------------|------------|------------|------------|------------|
| B26      | CAAGAAGCGC | CGGATATTTT | TCTGTTGGAA | CAGTCGAATT | CTTATTAGAT |
| B37      | CAAGAAGCGC | CGGATATTTT | TCTGTTGGAA | CAGTCGAATT | CTTATTAGAT |
| EBB      | CAAGAAGCGC | CGGATATTTT | TCTGTTGGAA | CAGTCGAATT | CTTATTAGAT |
| LPCoLN   | CAAGAAGCGC | CGGATATTTT | TCTGTTGGAA | CAGTCGAATT | CTTATTAGAT |
| Pot37    | CAAGAAGCGC | CGGATATTTT | TCTGTTGGAA | CAGTCGAATT | CTTATTAGAT |
| 2040.3   | CAAGAAGCGC | CGGATATTTT | TCTGTTGGAA | CAGTCGAATT | CTTATTAGAT |
| GBF      | CAAGAAGCGC | CGGATATTTT | TCTGTTGGAA | CAGTCGAATT | CTTATTAGAT |
| DE177    | CAAGAAGCGC | CGGATATTTT | TCTGTTGGAA | CAGTCGAATT | CTTATTAGAT |
| N16      | CAAGAAGCGC | CGGATATTTT | TCTGTTGGAA | CAGTCGAATT | CTTATTAGAT |
| AR39     | CAAGAAGCGC | CGGATATTTT | TCTGTTGGAA | CAGTCGAATT | CTTATTAGAT |
| CWL029   | CAAGAAGCGC | CGGATATTTT | TCTGTTGGAA | CAGTCGAATT | CTTATTAGAT |
| J138     | CAAGAAGCGC | CGGATATTTT | TCTGTTGGAA | CAGTCGAATT | CTTATTAGAT |
| TW183    | CAAGAAGCGC | CGGATATTTT | TCTGTTGGAA | CAGTCGAATT | CTTATTAGAT |
| A03      | CAAGAAGCGC | CGGATATTTT | TCTGTTGGAA | CAGTCGAATT | CTTATTAGAT |
| 1979     | CAAGAAGCGC | CGGATATTTT | TCTGTTGGAA | CAGTCGAATT | CTTATTAGAT |
| SH511    | CAAGAAGCGC | CGGATATTTT | TCTGTTGGAA | CAGTCGAATT | CTTATTAGAT |

| Identity | 260        | 270        | 280        | 290        |
|----------|------------|------------|------------|------------|
| B26      | AAAGACAAAA | AATTCTACTT | TATGGAAATG | AATACCCGAA |
| B37      | AAAGACAAAA | AATTCTACTT | TATGGAAATG | AATACCCGAA |
| EBB      | AAAGACAAAA | AATTCTACTT | TATGGAAATG | AATACCCGAA |
| LPCoLN   | AAAGACAAAA | AATTCTACTT | TATGGAAATG | AATACCCGAA |
| Pot37    | AAAGACAAAA | AATTCTACTT | TATGGAAATG | AATACCCGAA |
| 2040.3   | AAAGACAAAA | AATTCTACTT | TATGGAAATG | AATACCCGAA |
| GBF      | AAAGACAAAA | AATTCTACTT | TATGGAAATG | AATACCCGAA |
| DE177    | AAAGACAAAA | AATTCTACTT | TATGGAAATG | AATACCCGAA |
| N16      | AAAGACAAAA | AATTCTACTT | TATGGAAATG | AATACCCGAA |
| AR39     | AAAGACAAAA | AATTCTACTT | TATGGAAATG | AATACCCGAA |
| CWL029   | AAAGACAAAA | AATTCTACTT | TATGGAAATG | AATACCCGAA |
| J138     | AAAGACAAAA | AATTCTACTT | TATGGAAATG | AATACCCGAA |
| TW183    | AAAGACAAAA | AATTCTACTT | TATGGAAATG | AATACCCGAA |
| A03      | AAAGACAAAA | AATTCTACTT | TATGGAAATG | AATACCCGAA |
| 1979     | AAAGACAAAA | AATTCTACTT | TATGGAAATG | AATACCCGAA |
| SH511    | AAAGACAAAA | AATTCTACTT | TATGGAAATG | AATACCCGAA |

|          |                                                                                  |
|----------|----------------------------------------------------------------------------------|
|          | 302                                                                              |
| Identity | 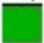 |
| B26      | GC                                                                               |
| B37      | GC                                                                               |
| EBB      | GC                                                                               |
| LPCoLN   | GC                                                                               |
| Pot37    | GC                                                                               |
| 2040.3   | GC                                                                               |
| GBF      | GC                                                                               |
| DE177    | GC                                                                               |
| N16      | GC                                                                               |
| AR39     | GC                                                                               |
| CWL029   | GC                                                                               |
| J138     | GC                                                                               |
| TW183    | GC                                                                               |
| A03      | GC                                                                               |
| 1979     | GC                                                                               |
| SH511    | GC                                                                               |

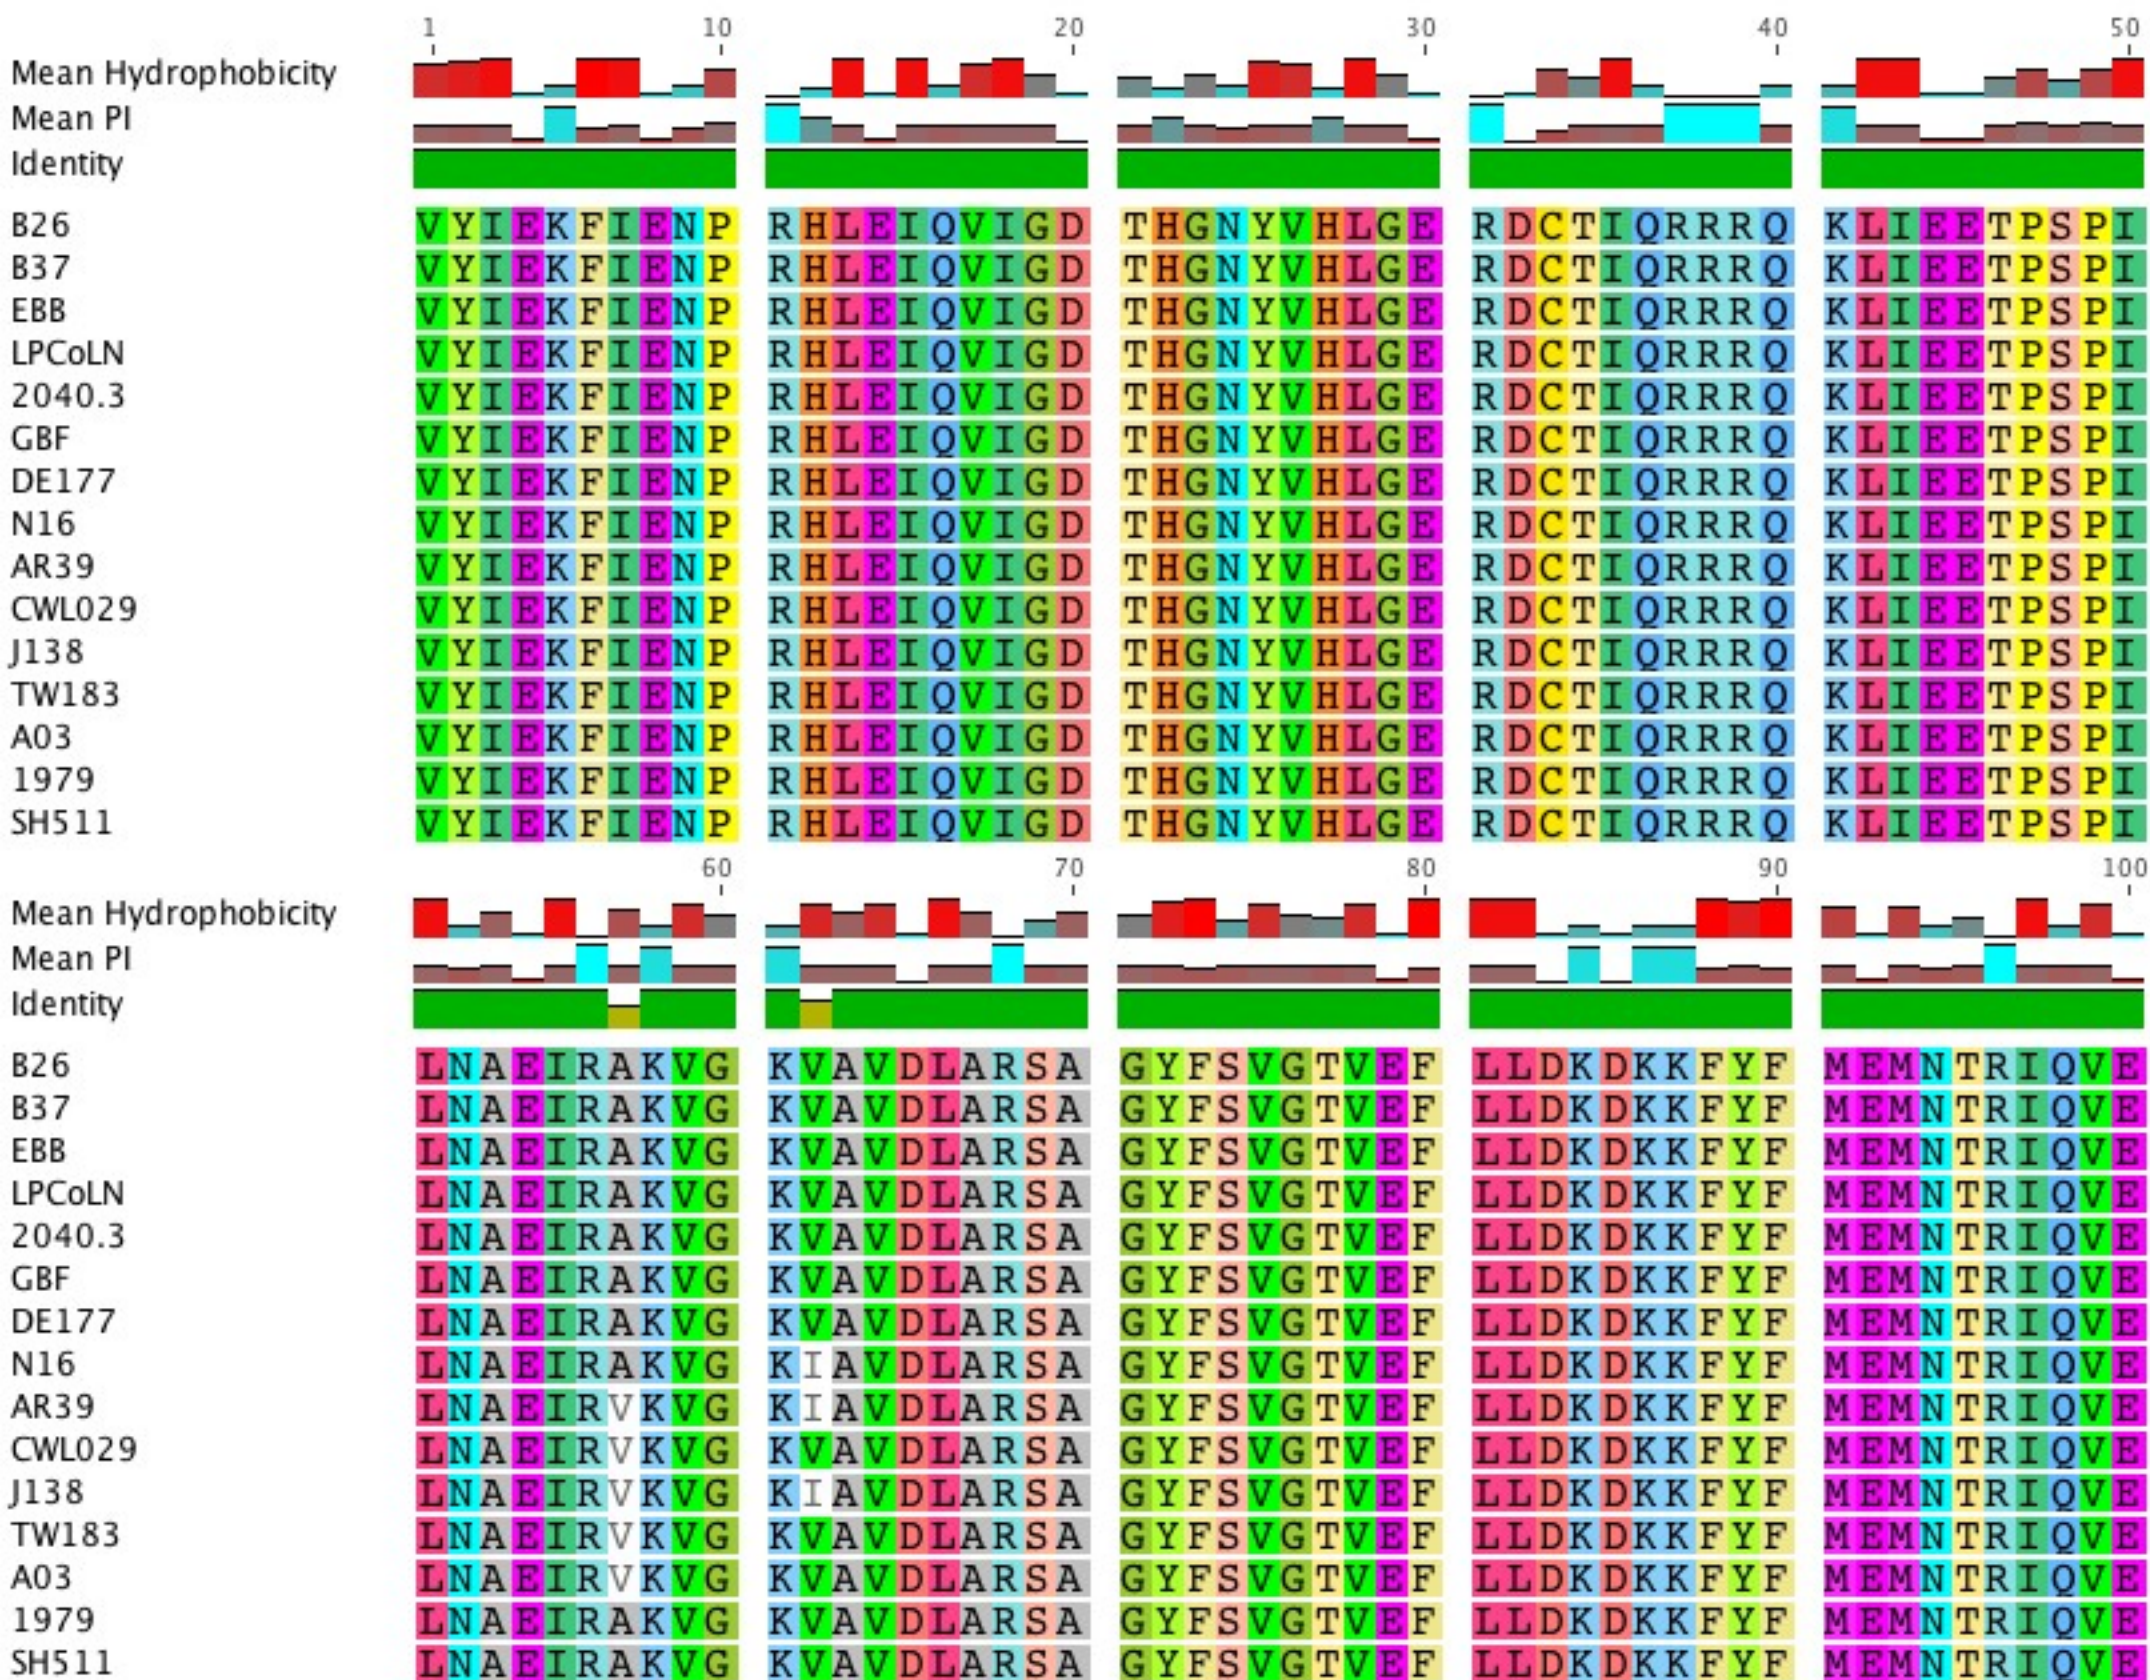

Supplement: Figure S10 — Multiple sequence alignment of accC . The nucleotide and amino acid alignments were generated using Geneious version 4.7, where each nucleotide and amino acid is assigned its own colour. White shading indicates an amino acid variant. (0.71 MB PDF) [file ppat.1000903.s010.pdf]
