# Supplementary material for: Chlamydia pneumoniae Is Genetically Diverse in Animals and Appears to Have Crossed the Host Barrier to Humans on (At Least) Two Occasions
Source: PubMed Central journal article supplement (PMC2873915; doi:10.1371/journal.ppat.1000903), 2010-05-20

|          | 1          | 10         | 20         | 30         | 40         | 50 |
|----------|------------|------------|------------|------------|------------|----|
| Identity |            |            |            |            |            |    |
| B26      | CCAATCTATG | TCGGATCCCT | GAAGTTTCTA | TTTATACTGA | ACAGGAAACG |    |
| B37      | CCAATCTATG | TCGGATCCCT | GAAGTTTCTA | TTTATACTGA | ACAGGAAACG |    |
| EBB      | CCAATCTATG | TCGGATCCCT | GAAGTTTCTA | TTTATACTGA | ACAGGAAACG |    |
| LPCoLN   | CCAATCTATG | TCGGATCCCT | GAAGTTTCTA | TTTATACTGA | ACAGGAAACG |    |
| Pot37    | CCAATCTATG | TCGGATCCCT | GAAGTTTCTA | TTTATACTGA | ACAGGAAACG |    |
| GBF      | CCAATCTATG | TCGGATCCCT | GAAGTTTCTA | TTTATACTGA | ACAGGAAACG |    |
| DE177    | CCAATCTATG | TCGGATCCCT | GAAGTTTCTA | TTTATACTGA | ACAGGAAACG |    |
| N16      | CCAATCTATG | TCGGATCCCT | GAAGTTTCTA | TTTATACTGA | ACAGGAAACG |    |
| AR39     | CCAATCTATG | TCGGATCCCT | GAAGTTTCTA | TTTATACTGA | ACAGGAAACG |    |
| CWL029   | CCAATCTATG | TCGGATCCCT | GAAGTTTCTA | TTTATACTGA | ACAGGAAACG |    |
| J138     | CCAATCTATG | TCGGATCCCT | GAAGTTTCTA | TTTATACTGA | ACAGGAAACG |    |
| TW183    | CCAATCTATG | TCGGATCCCT | GAAGTTTCTA | TTTATACTGA | ACAGGAAACG |    |
| IOL207   | CCAATCTATG | TCGGATCCCT | GAAGTTTCTA | TTTATACTGA | ACAGGAAACG |    |
| A03      | CCAATCTATG | TCGGATCCCT | GAAGTTTCTA | TTTATACTGA | ACAGGAAACG |    |
| WA97001  | CCAATCTATG | TCGGATCCCT | GAAGTTTCTA | TTTATACTGA | ACAGGAAACG |    |
| SH511    | CCAATCTATG | TCGGATCCCT | GAAGTTTCTA | TTTATACTGA | ACAGGAAACG |    |
| 1979     | CCAATCTATG | TCGGATCCCT | GAAGTTTCTA | TTTATACTGA | ACAGGAAACG |    |

|          | 60           | 70          | 80          | 90         | 100        |
|----------|--------------|-------------|-------------|------------|------------|
| Identity |              |             |             |            |            |
| B26      | TCA TC AAAAC | CAT TAAAGAT | TGGGG TTTTA | CTATCAGGAG | GACAAGCTCC |
| B37      | TCA TC AAAAC | CAT TAAAGAT | TGGGG TTTTA | CTATCAGGAG | GACAAGCTCC |
| EBB      | TCA TC AAAAC | CAT TAAAGAT | TGGGG TTTTA | CTATCAGGAG | GACAAGCTCC |
| LPCoLN   | TCA TC AAAAC | CAT TAAAGAT | TGGGG TTTTA | CTATCAGGAG | GACAAGCTCC |
| Pot37    | TCA TC AAAAC | CAT TAAAGAT | TGGGG TTTTA | CTATCAGGAG | GACAAGCTCC |
| GBF      | TCA TC AAAAC | CAT TAAAGAT | TGGGG TTTTA | CTATCAGGAG | GACAAGCTCC |
| DE177    | TCA TC AAAAC | CAT TAAAGAT | TGGGG TTTTA | CTATCAGGAG | GACAAGCTCC |
| N16      | TCA TC AAAAC | CAT TAAAGAT | TGGGG TTTTA | CTATCAGGAG | GACAAGCTCC |
| AR39     | TCA TC AAAAC | CAT TAAAGAT | TGGGG TTTTA | CTATCAGGAG | GACAAGCTCC |
| CWL029   | TCA TC AAAAC | CAT TAAAGAT | TGGGG TTTTA | CTATCAGGAG | GACAAGCTCC |
| J138     | TCA TC AAAAC | CAT TAAAGAT | TGGGG TTTTA | CTATCAGGAG | GACAAGCTCC |
| TW183    | TCA TC AAAAC | CAT TAAAGAT | TGGGG TTTTA | CTATCAGGAG | GACAAGCTCC |
| IOL207   | TCA TC AAAAC | CAT TAAAGAT | TGGGG TTTTA | CTATCAGGAG | GACAAGCTCC |
| A03      | TCA TC AAAAC | CAT TAAAGAT | TGGGG TTTTA | CTATCAGGAG | GACAAGCTCC |
| WA97001  | TCA TC AAAAC | CAT TAAAGAT | TGGGG TTTTA | CTATCAGGAG | GACAAGCTCC |
| SH511    | TCA TC AAAAC | CAT TAAAGAT | TGGGG TTTTA | CTATCAGGAG | GACAAGCTCC |
| 1979     | TCA TC AAAAC | CAT TAAAGAT | TGGGG TTTTA | CTATCAGGAG | GACAAGCTCC |

|          | 110        | 120           | 130        | 140        | 150        |
|----------|------------|---------------|------------|------------|------------|
| Identity |            |               |            |            |            |
| B26      | TGGGGGGGCA | AA TG TCG TTA | TTGGTCTTTT | TGATGCTTTA | CGAGTATTCA |
| B37      | TGGGGGGGCA | AA TG TCG TTA | TTGGTCTTTT | TGATGCTTTA | CGAGTATTCA |
| EBB      | TGGGGGGGCA | AA TG TCG TTA | TTGGTCTTTT | TGATGCTTTA | CGAGTATTCA |
| LPCoLN   | TGGGGGGGCA | AA TG TCG TTA | TTGGTCTTTT | TGATGCTTTA | CGAGTATTCA |
| Pot37    | TGGGGGGGCA | AA TG TCG TTA | TTGGTCTTTT | TGATGCTTTA | CGAGTATTCA |
| GBF      | TGGGGGGGCA | AA TG TCG TTA | TTGGTCTTTT | TGATGCTTTA | CGAGTATTCA |
| DE177    | TGGGGGGGCA | AA TG TCG TTA | TTGGTCTTTT | TGATGCTTTA | CGAGTATTCA |
| N16      | TGGGGGGGCA | AA TG TCG TTA | TTGGTCTTTT | TGATGCTTTA | CGAGTATTCA |
| AR39     | TGGGGGGGCA | AA TG TCG TTA | TTGGTCTTTT | TGATGCTTTA | CGAGTATTCA |
| CWL029   | TGGGGGGGCA | AA TG TCG TTA | TTGGTCTTTT | TGATGCTTTA | CGAGTATTCA |
| J138     | TGGGGGGGCA | AA TG TCG TTA | TTGGTCTTTT | TGATGCTTTA | CGAGTATTCA |
| TW183    | TGGGGGGGCA | AA TG TCG TTA | TTGGTCTTTT | TGATGCTTTA | CGAGTATTCA |
| IOL207   | TGGGGGGGCA | AA TG TCG TTA | TTGGTCTTTT | TGATGCTTTA | CGAGTATTCA |
| A03      | TGGGGGGGCA | AA TG TCG TTA | TTGGTCTTTT | TGATGCTTTA | CGAGTATTCA |
| WA97001  | TGGGGGGGCA | AA TG TCG TTA | TTGGTCTTTT | TGATGCTTTA | CGAGTATTCA |
| SH511    | TGGGGGGGCA | AA TG TCG TTA | TTGGTCTTTT | TGATGCTTTA | CGAGTATTCA |
| 1979     | TGGGGGGGCA | AA TG TCG TTA | TTGGTCTTTT | TGATGCTTTA | CGAGTATTCA |

|          |                                                                                 |                                                                                  |                                                                                   |                                                                                   |                                                                                   |
|----------|---------------------------------------------------------------------------------|----------------------------------------------------------------------------------|-----------------------------------------------------------------------------------|-----------------------------------------------------------------------------------|-----------------------------------------------------------------------------------|
| Identity |  |  |  |  |  |
|          | 160                                                                             | 170                                                                              | 180                                                                               | 190                                                                               | 200                                                                               |
| B26      | ATCCC <b>G</b> AGAC                                                             | TCGCTTATTT                                                                       | GGATTCA TCA                                                                       | AAGGACCTTT                                                                        | AGGGCTTACT                                                                        |
| B37      | ATCCC <b>G</b> AGAC                                                             | TCGCTTATTT                                                                       | GGATTCA TCA                                                                       | AAGGACCTTT                                                                        | AGGGCTTACT                                                                        |
| EBB      | ATCCC <b>G</b> AGAC                                                             | TCGCTTATTT                                                                       | GGATTCA TCA                                                                       | AAGGACCTTT                                                                        | AGGGCTTACT                                                                        |
| LPCoLN   | ATCCC <b>G</b> AGAC                                                             | TCGCTTATTT                                                                       | GGATTCA TCA                                                                       | AAGGACCTTT                                                                        | AGGGCTTACT                                                                        |
| Pot37    | ATCCC <b>G</b> AGAC                                                             | TCGCTTATTT                                                                       | GGATTCA TCA                                                                       | AAGGACCTTT                                                                        | AGGGCTTACT                                                                        |
| GBF      | ATCCC <b>G</b> AGAC                                                             | TCGCTTATTT                                                                       | GGATTCA TCA                                                                       | AAGGACCTTT                                                                        | AGGGCTTACT                                                                        |
| DE177    | ATCCCAAGAC                                                                      | TCGCTTATTT                                                                       | GGATTCA TCA                                                                       | AAGGACCTTT                                                                        | AGGGCTTACT                                                                        |
| N16      | ATCCCAAGAC                                                                      | TCGCTTATTT                                                                       | GGATTCA TCA                                                                       | AAGGACCTTT                                                                        | AGGGCTTACT                                                                        |
| AR39     | ATCCCAAGAC                                                                      | TCGCTTATTT                                                                       | GGATTCA TCA                                                                       | AAGGACCTTT                                                                        | AGGGCTTACT                                                                        |
| CWL029   | ATCCCAAGAC                                                                      | TCGCTTATTT                                                                       | GGATTCA TCA                                                                       | AAGGACCTTT                                                                        | AGGGCTTACT                                                                        |
| J138     | ATCCCAAGAC                                                                      | TCGCTTATTT                                                                       | GGATTCA TCA                                                                       | AAGGACCTTT                                                                        | AGGGCTTACT                                                                        |
| TW183    | ATCCCAAGAC                                                                      | TCGCTTATTT                                                                       | GGATTCA TCA                                                                       | AAGGACCTTT                                                                        | AGGGCTTACT                                                                        |
| IOL207   | ATCCCAAGAC                                                                      | TCGCTTATTT                                                                       | GGATTCA TCA                                                                       | AAGGACCTTT                                                                        | AGGGCTTACT                                                                        |
| A03      | ATCCCAAGAC                                                                      | TCGCTTATTT                                                                       | GGATTCA TCA                                                                       | AAGGACCTTT                                                                        | AGGGCTTACT                                                                        |
| WA97001  | ATCCCAAGAC                                                                      | TCGCTTATTT                                                                       | GGATTCA TCA                                                                       | AAGGACCTTT                                                                        | AGGGCTTACT                                                                        |
| SH511    | ATCCCAAGAC                                                                      | TCGCTTATTT                                                                       | GGATTCA TCA                                                                       | AAGGACCTTT                                                                        | AGGGCTTACT                                                                        |
| 1979     | ATCCCAAGAC                                                                      | TCGCTTATTT                                                                       | GGATTCA TCA                                                                       | AAGGACCTTT                                                                        | AGGGCTTACT                                                                        |

|          |                                                                                   |                                                                                    |                                                                                     |                                                                                     |                                                                                     |
|----------|-----------------------------------------------------------------------------------|------------------------------------------------------------------------------------|-------------------------------------------------------------------------------------|-------------------------------------------------------------------------------------|-------------------------------------------------------------------------------------|
|          | 210                                                                               | 220                                                                                | 230                                                                                 | 240                                                                                 | 250                                                                                 |
| Identity |  |  |  |  |  |
| B26      | CGTGGGCTCT                                                                        | ATAAAGATCT                                                                         | GGATA TCTCC                                                                         | GTAATCTATG                                                                          | ATTATTACAA                                                                          |
| B37      | CGTGGGCTCT                                                                        | ATAAAGATCT                                                                         | GGATA TCTCC                                                                         | GTAATCTATG                                                                          | ATTATTACAA                                                                          |
| EBB      | CGTGGGCTCT                                                                        | ATAAAGATCT                                                                         | GGATA TCTCC                                                                         | GTAATCTATG                                                                          | ATTATTACAA                                                                          |
| LPCoLN   | CGTGGGCTCT                                                                        | ATAAAGATCT                                                                         | GGATA TCTCC                                                                         | GTAATCTATG                                                                          | ATTATTACAA                                                                          |
| Pot37    | CGTGGGCTCT                                                                        | ATAAAGATCT                                                                         | GGATA TCTCC                                                                         | GTAATCTATG                                                                          | ATTATTACAA                                                                          |
| GBF      | CGTGGGCTCT                                                                        | ATAAAGATCT                                                                         | GGATA TCTCC                                                                         | GTAATCTATG                                                                          | ATTATTACAA                                                                          |
| DE177    | CGTGGGCTCT                                                                        | ATAAAGATCT                                                                         | GGATA TCTCC                                                                         | GTAATCTATG                                                                          | ATTATTACAA                                                                          |
| N16      | CGTGGGCTCT                                                                        | ATAAAGATCT                                                                         | GGATA TCTCC                                                                         | GTAATCTATG                                                                          | ATTATTACAA                                                                          |
| AR39     | CGTGGGCTCT                                                                        | ATAAAGATCT                                                                         | GGATA TCTCC                                                                         | GTAATCTATG                                                                          | ATTATTACAA                                                                          |
| CWL029   | CGTGGGCTCT                                                                        | ATAAAGATCT                                                                         | GGATA TCTCC                                                                         | GTAATCTATG                                                                          | ATTATTACAA                                                                          |
| J138     | CGTGGGCTCT                                                                        | ATAAAGATCT                                                                         | GGATA TCTCC                                                                         | GTAATCTATG                                                                          | ATTATTACAA                                                                          |
| TW183    | CGTGGGCTCT                                                                        | ATAAAGATCT                                                                         | GGATA TCTCC                                                                         | GTAATCTATG                                                                          | ATTATTACAA                                                                          |
| IOL207   | CGTGGGCTCT                                                                        | ATAAAGATCT                                                                         | GGATA TCTCC                                                                         | GTAATCTATG                                                                          | ATTATTACAA                                                                          |
| A03      | CGTGGGCTCT                                                                        | ATAAAGATCT                                                                         | GGATA TCTCC                                                                         | GTAATCTATG                                                                          | ATTATTACAA                                                                          |
| WA97001  | CGTGGGCTCT                                                                        | ATAAAGATCT                                                                         | GGATA TCTCC                                                                         | GTAATCTATG                                                                          | ATTATTACAA                                                                          |
| SH511    | CGTGGGCTCT                                                                        | ATAAAGATCT                                                                         | GGATA TCTCC                                                                         | GTAATCTATG                                                                          | ATTATTACAA                                                                          |
| 1979     | CGTGGGCTCT                                                                        | ATAAAGATCT                                                                         | GGATA TCTCC                                                                         | GTAATCTATG                                                                          | ATTATTACAA                                                                          |

|          |                                                                                     |                                                                                      |
|----------|-------------------------------------------------------------------------------------|--------------------------------------------------------------------------------------|
|          | 260                                                                                 | 263                                                                                  |
| Identity |  |  |
| B26      | CATGGGAGGG                                                                          | TTC                                                                                  |
| B37      | CATGGGAGGG                                                                          | TTC                                                                                  |
| EBB      | CATGGGAGGG                                                                          | TTC                                                                                  |
| LPCoLN   | CATGGGAGGG                                                                          | TTC                                                                                  |
| Pot37    | CATGGGAGGG                                                                          | TTC                                                                                  |
| GBF      | CATGGGAGGG                                                                          | TTC                                                                                  |
| DE177    | CATGGGAGGG                                                                          | TTC                                                                                  |
| N16      | CATGGGAGGG                                                                          | TTC                                                                                  |
| AR39     | CATGGGAGGG                                                                          | TTC                                                                                  |
| CWL029   | CATGGGAGGG                                                                          | TTC                                                                                  |
| J138     | CATGGGAGGG                                                                          | TTC                                                                                  |
| TW183    | CATGGGAGGG                                                                          | TTC                                                                                  |
| IOL207   | CATGGGAGGG                                                                          | TTC                                                                                  |
| A03      | CATGGGAGGG                                                                          | TTC                                                                                  |
| WA97001  | CATGGGAGGG                                                                          | TTC                                                                                  |
| SH511    | CATGGGAGGG                                                                          | TTC                                                                                  |
| 1979     | CATGGGAGGG                                                                          | TTC                                                                                  |

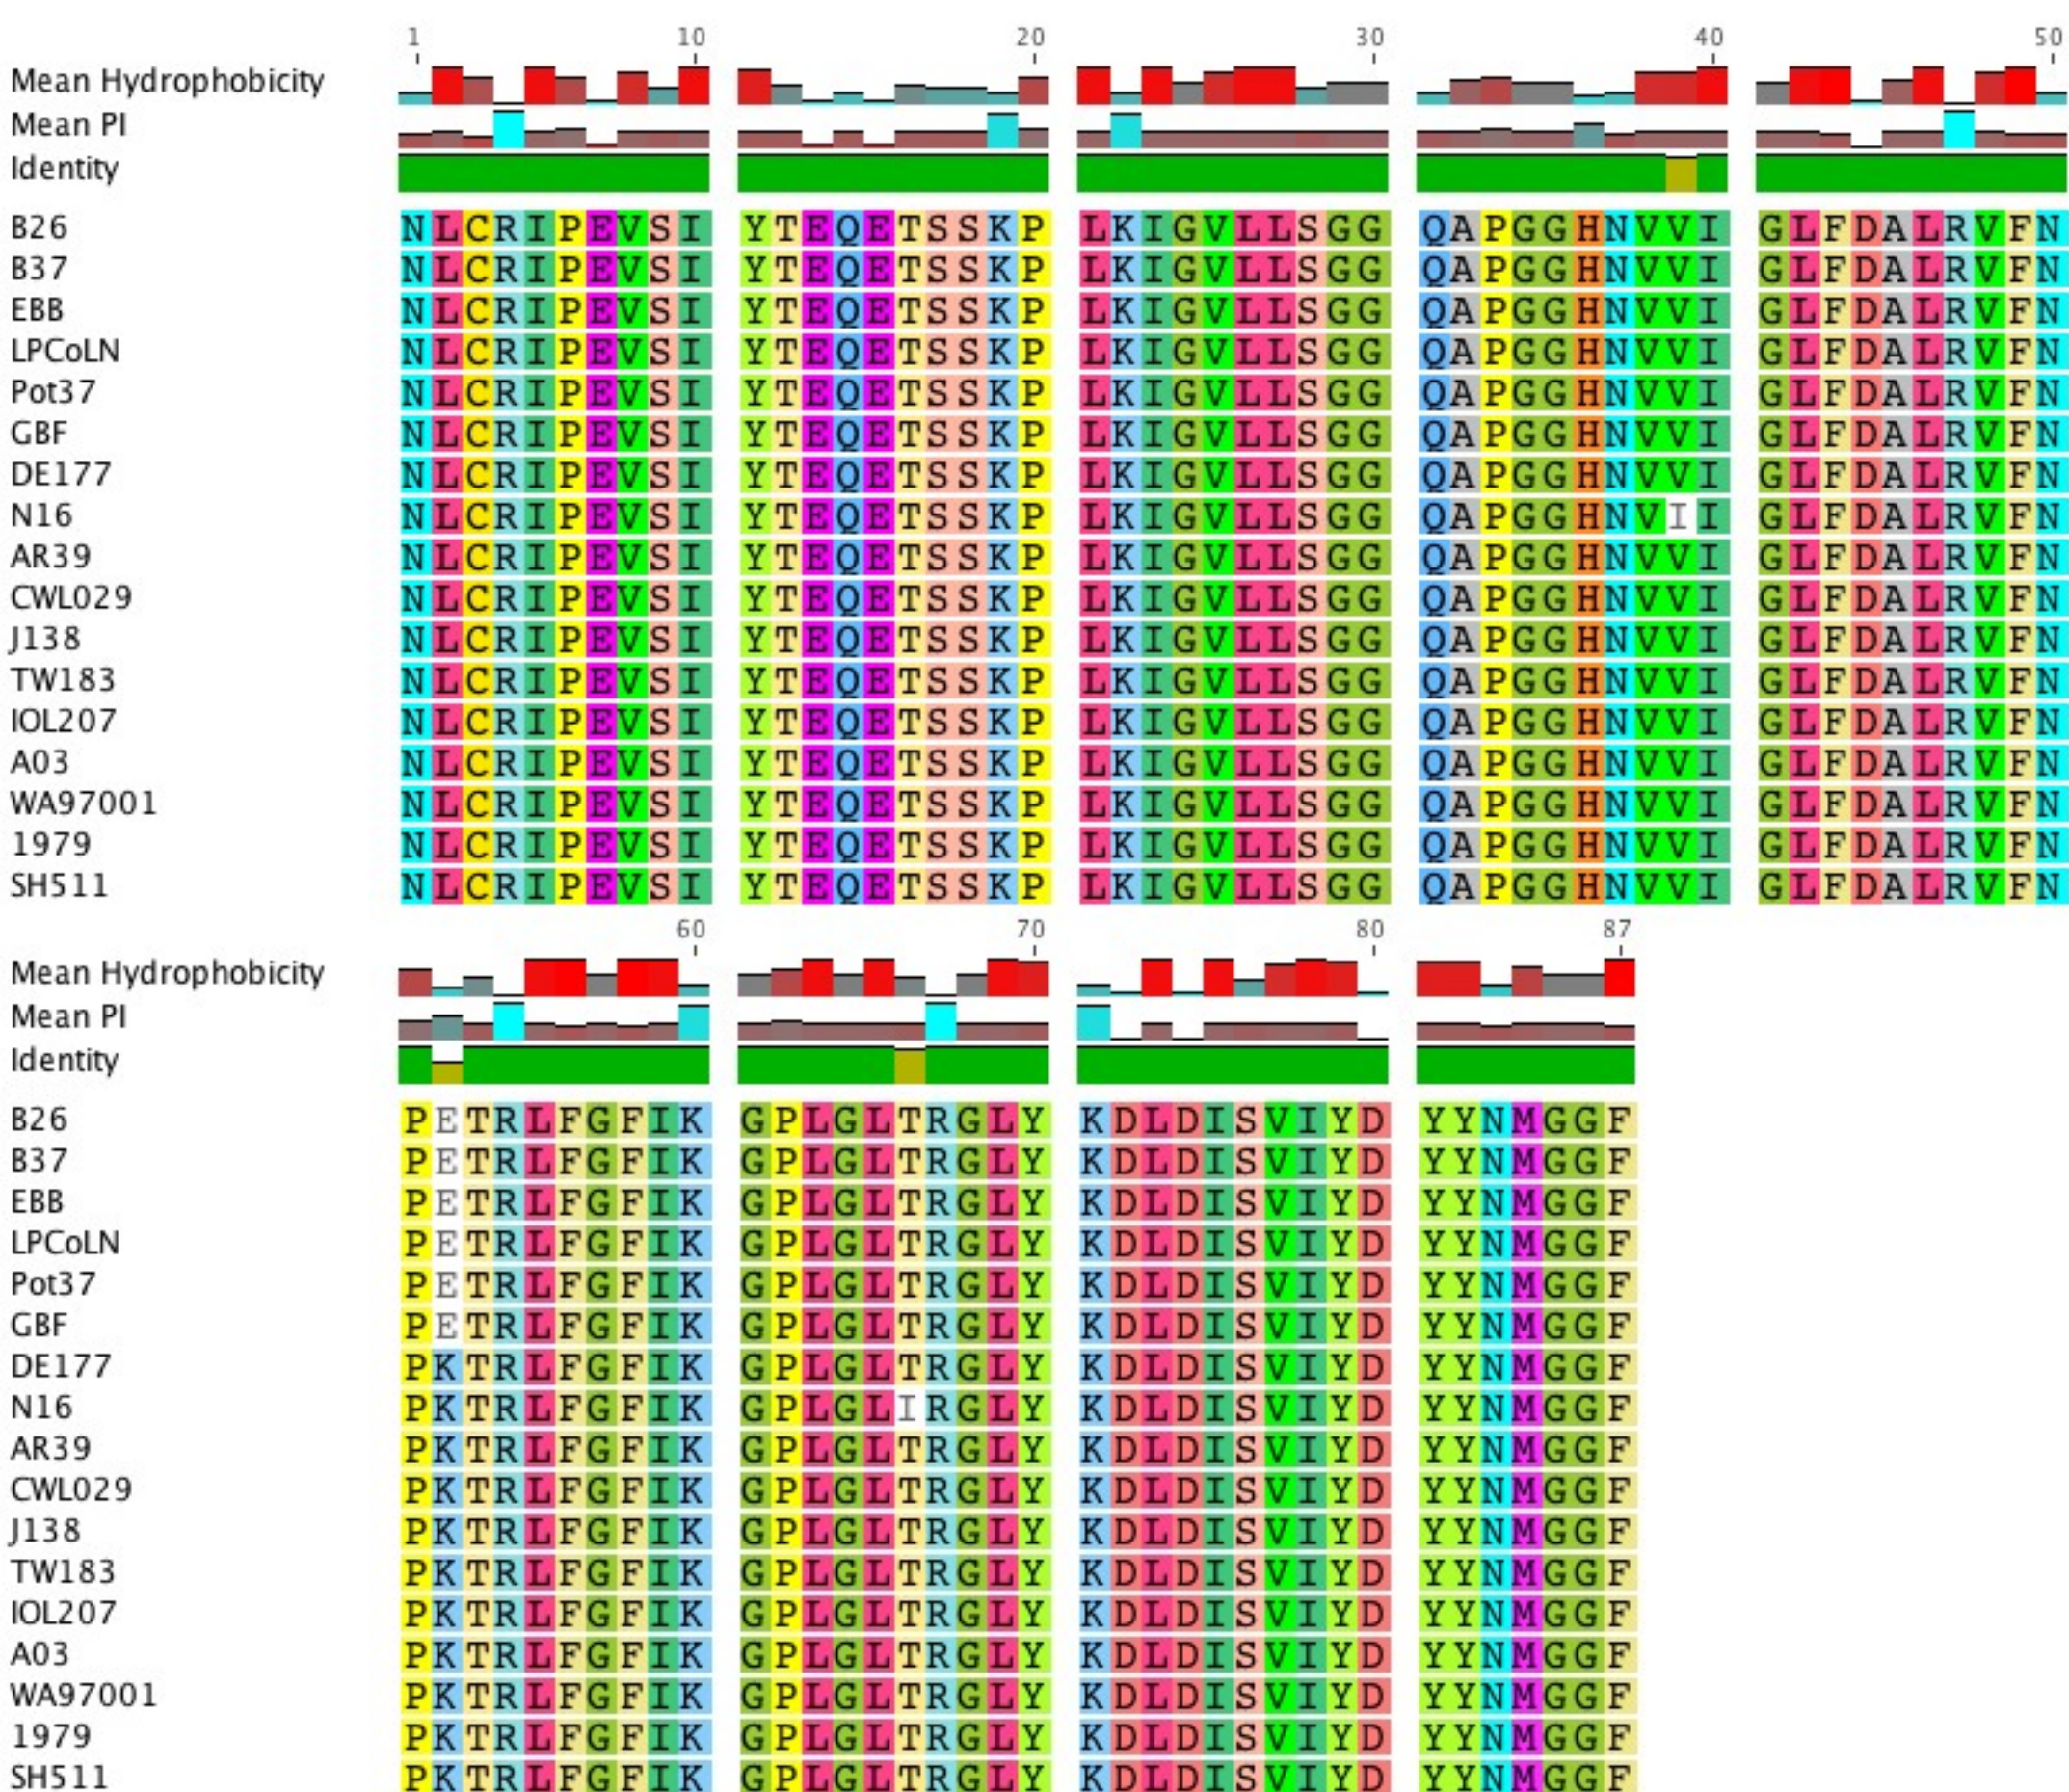

Supplement: ppat.1000903.s011.pdf [file ppat.1000903.s011.pdf]
