# Supplementary material for: Chlamydia pneumoniae Is Genetically Diverse in Animals and Appears to Have Crossed the Host Barrier to Humans on (At Least) Two Occasions
Source: PubMed Central journal article supplement (PMC2873915; doi:10.1371/journal.ppat.1000903), 2010-05-20

|          | 1                           | 10                                           | 20                                  | 30                                         | 40                                        | 50 |
|----------|-----------------------------|----------------------------------------------|-------------------------------------|--------------------------------------------|-------------------------------------------|----|
| Identity |                             |                                              |                                     |                                            |                                           |    |
| DE177    | AATCCTTTTA                  | TATAAATATA                                   | AGAGATTCAA                          | GGTTTTATTTC                                | ATGGC TTTGC                               |    |
| N16      | AATCCTTTTA                  | TATAAA <b>C</b> ATA                          | AGAGAT <b>G</b> <b>C</b> <b>G</b>   | <b>G</b> ATTTTATT <b>A</b>                 | ATG <b>A</b> T TTTGC                      |    |
| AR39     | AATCCTTTTA                  | TATAAATATA                                   | AGAGATTCAA                          | GGTTTTATTTC                                | ATGGC TTTGC                               |    |
| CWL029   | AATCCTTTTA                  | TATAAATATA                                   | AGAGATTCAA                          | GGTTTTATTTC                                | ATGGC TTTGC                               |    |
| J138     | AATCCTTTTA                  | TATAAATATA                                   | AGAGATTCAA                          | GGTTTTATTTC                                | ATGGC TTTGC                               |    |
| TW183    | AATCCTTTTA                  | TATAAATATA                                   | AGAGATTCAA                          | GGTTTTATTTC                                | ATGGC TTTGC                               |    |
| TOR1     | AATCCTTTTA                  | TATAAATATA                                   | AGAGATTCAA                          | GGTTTTATTTC                                | ATGGC TTTGC                               |    |
| WA97001  | AATCCTTTTA                  | TATAAATATA                                   | AGAGATTCAA                          | GGTTTTATTTC                                | ATGGC TTTGC                               |    |
| 1979     | AATCCTTTTA                  | TATAAATATA                                   | AGAGATTCAA                          | GGTTTTATTTC                                | ATGGC TTTGC                               |    |
| SH511    | AATCCTTTTA                  | TATAAATATA                                   | AGAGATTCAA                          | GGTTTTATTTC                                | ATGGC TTTGC                               |    |
| Identity |                             |                                              |                                     |                                            |                                           |    |
| DE177    | TTTATAATGA                  | AGGAAACGTA                                   | CTACCGCGAC                          | TTTC TTCATG                                | AGAAC TATTT                               |    |
| N16      | TTTATAATGA                  | AG <b>T</b> A <b>C</b> <b>G</b> CGT <b>C</b> | CT <b>T</b> C CG <b>T</b> GAC       | TTT <b>A</b> TT <b>A</b> <b>A</b> <b>A</b> | AGAA <b>A</b> TATTT                       |    |
| AR39     | TTTATAATGA                  | AGGAAACGTA                                   | CTACCGCGAC                          | TTTC TTCATG                                | AGAAC TATTT                               |    |
| CWL029   | TTTATAATGA                  | AGGAAACGTA                                   | CTACCGCGAC                          | TTTC TTCATG                                | AGAAC TATTT                               |    |
| J138     | TTTATAATGA                  | AGGAAACGTA                                   | CTACCGCGAC                          | TTTC TTCATG                                | AGAAC TATTT                               |    |
| TW183    | TTTATAATGA                  | AGGAAACGTA                                   | CTACCGCGAC                          | TTTC TTCATG                                | AGAAC TATTT                               |    |
| TOR1     | TTTATAATGA                  | AGGAAACGTA                                   | CTACCGCGAC                          | TTTC TTCATG                                | AGAAC TATTT                               |    |
| WA97001  | TTTATAATGA                  | AGGAAACGTA                                   | CTACCGCGAC                          | TTTC TTCATG                                | AGAAC TATTT                               |    |
| 1979     | TTTATAATGA                  | AGGAAACGTA                                   | CTACCGCGAC                          | TTTC TTCATG                                | AGAAC TATTT                               |    |
| SH511    | TTTATAATGA                  | AGGAAACGTA                                   | CTACCGCGAC                          | TTTC TTCATG                                | AGAAC TATTT                               |    |
| Identity |                             |                                              |                                     |                                            |                                           |    |
| DE177    | GAAAAACAAG                  | AAGAGCATGT                                   | TTATGAAAAAT                         | TTATAAAACT                                 | G CAGGGGAGT                               |    |
| N16      | <b>T</b> AAA-- <b>T</b> AAG | AAGAGCATGT                                   | TTATGAAAAAT                         | TTATAAAAC <b>C</b>                         | <b>G</b> <b>T</b> TGGGG <b>A</b> <b>A</b> |    |
| AR39     | GAAAAACAAG                  | AAGAGCATGT                                   | TTATGAAAAAT                         | TTATAAAACT                                 | G CAGGGGAGT                               |    |
| CWL029   | GAAAAACAAG                  | AAGAGCATGT                                   | TTATGAAAAAT                         | TTATAAAACT                                 | G CAGGGGAGT                               |    |
| J138     | GAAAAACAAG                  | AAGAGCATGT                                   | TTATGAAAAAT                         | TTATAAAACT                                 | G CAGGGGAGT                               |    |
| TW183    | GAAAAACAAG                  | AAGAGCATGT                                   | TTATGAAAAAT                         | TTATAAAACT                                 | G CAGGGGAGT                               |    |
| TOR1     | GAAAAACAAG                  | AAGAGCATGT                                   | TTATGAAAAAT                         | TTATAAAACT                                 | G CAGGGGAGT                               |    |
| WA97001  | GAAAAACAAG                  | AAGAGCATGT                                   | TTATGAAAAAT                         | TTATAAAACT                                 | G CAGGGGAGT                               |    |
| 1979     | GAAAAACAAG                  | AAGAGCATGT                                   | TTATGAAAAAT                         | TTATAAAACT                                 | G CAGGGGAGT                               |    |
| SH511    | GAAAAACAAG                  | AAGAGCATGT                                   | TTATGAAAAAT                         | TTATAAAACT                                 | G CAGGGGAGT                               |    |
| Identity |                             |                                              |                                     |                                            |                                           |    |
| DE177    | TTTTTTTAGC                  | AAATGCAAAA                                   | TGGCCCTTGG                          | TACCGGCTGG                                 | GTATCGACGT                                |    |
| N16      | TTTTTT <b>G</b> TAGC        | AAATGCA <b>G</b> A <b>C</b>                  | TGGCC <b>G</b> TT <b>G</b> <b>A</b> | T <b>A</b> <b>T</b> <b>G</b> GGCTGG        | GTATCGACGT                                |    |
| AR39     | TTTTTTTAGC                  | AAATGCAAAA                                   | TGGCCCTTGG                          | TACCGGCTGG                                 | GTATCGACGT                                |    |
| CWL029   | TTTTTTTAGC                  | AAATGCAAAA                                   | TGGCCCTTGG                          | TACCGGCTGG                                 | GTATCGACGT                                |    |
| J138     | TTTTTTTAGC                  | AAATGCAAAA                                   | TGGCCCTTGG                          | TACCGGCTGG                                 | GTATCGACGT                                |    |
| TW183    | TTTTTTTAGC                  | AAATGCAAAA                                   | TGGCCCTTGG                          | TACCGGCTGG                                 | GTATCGACGT                                |    |
| TOR1     | TTTTTTTAGC                  | AAATGCAAAA                                   | TGGCCCTTGG                          | TACCGGCTGG                                 | GTATCGACGT                                |    |
| WA97001  | TTTTTTTAGC                  | AAATGCAAAA                                   | TGGCCCTTGG                          | TACCGGCTGG                                 | GTATCGACGT                                |    |
| 1979     | TTTTTTTAGC                  | AAATGCAAAA                                   | TGGCCCTTGG                          | TACCGGCTGG                                 | GTATCGACGT                                |    |
| SH511    | TTTTTTTAGC                  | AAATGCAAAA                                   | TGGCCCTTGG                          | TACCGGCTGG                                 | GTATCGACGT                                |    |

| Identity | 210                 | 220                 | 230                 | 240                 | 250                 |
|----------|---------------------|---------------------|---------------------|---------------------|---------------------|
| DE177    | G T T C G A G G A A | A A G A T T T T G T | T C T A T C T C C G | C T C G T G G A C T | T A G T G A T T C T |
| N16      | G T T C G A G G A C | A A G A C T T T G T | T A C A T C T C C T | G T T G A G G A C T | T A G T G A T T C T |
| AR39     | G T T C G A G G A A | A A G A T T T T G T | T C T A T C C C C G | C T C G T G G A C T | T A G T G A T T C T |
| CWL029   | G T T C G A G G A A | A A G A T T T T G T | T C T A T C C C C G | C T C G T G G A C T | T A G T G A T T C T |
| J138     | G T T C G A G G A A | A A G A T T T T G T | T C T A T C C C C G | C T C G T G G A C T | T A G T G A T T C T |
| TW183    | G T T C G A G G A A | A A G A T T T T G T | T C T A T C C C C G | C T C G T G G A C T | T A G T G A T T C T |
| TOR1     | G T T C G A G G A A | A A G A T T T T G T | T C T A T C C C C G | C T C G T G G A C T | T A G T G A T T C T |
| WA97001  | G T T C G A G G A A | A A G A T T T T G T | T C T A T C C C C G | C T C G T G G A C T | T A G T G A T T C T |
| 1979     | G T T C G A G G A A | A A G A T T T T G T | T C T A T C T C C G | C T C G T G G A C T | T A G T G A T T C T |
| SH511    | G T T C G A G G A A | A A G A T T T T G T | T C T A T C T C C G | C T C G T G G A C T | T A G T G A T T C T |

| Identity | 260                 | 270                 | 280                 | 290                 | 300                 |
|----------|---------------------|---------------------|---------------------|---------------------|---------------------|
| DE177    | A T T T C C T T G G | G T A A C C A A A G | A C T C C C G A T A | T T C A C C T T G C | A G C A T G A C A T |
| N16      | A T T T C C T T G G | G T A A C C G A A G | A C T C C C A A T A | T T C A C C T T A C | A G C A T G A C A T |
| AR39     | A T T T C C T T G G | G T A A C C A A A G | A C T C C C G A T A | T T C A C C T T G C | A G C A T G A C A T |
| CWL029   | A T T T C C T T G G | G T A A C C A A A G | A C T C C C G A T A | T T C A C C T T G C | A G C A T G A C A T |
| J138     | A T T T C C T T G G | G T A A C C A A A G | A C T C C C G A T A | T T C A C C T T G C | A G C A T G A C A T |
| TW183    | A T T T C C T T G G | G T A A C C A A A G | A C T C C C G A T A | T T C A C C T T G C | A G C A T G A C A T |
| TOR1     | A T T T C C T T G G | G T A A C C A A A G | A C T C C C G A T A | T T C A C C T T G C | A G C A T G A C A T |
| WA97001  | A T T T C C T T G G | G T A A C C A A A G | A C T C C C G A T A | T T C A C C T T G C | A G C A T G A C A T |
| 1979     | A T T T C C T T G G | G T A A C C A A A G | A C T C C C G A T A | T T C A C C T T G C | A G C A C G A C A T |
| SH511    | A T T T C C T T G G | G T A A C C A A A G | A C T C C C G A T A | T T C A C C T T G C | A G C A C G A C A T |

| Identity | 310                 | 320                 | 330                 | 340                 | 350                 |
|----------|---------------------|---------------------|---------------------|---------------------|---------------------|
| DE177    | T C A C T T G T A T | T T G T A G G A G T | A T A G T A G A G T | G T A T T C C T G T | T G T A A G T A C A |
| N16      | G C A T T T C T A T | T C G T A G G A G T | A T A G T A G A G A | G T A T T C C C A T | T G C A A G T G C A |
| AR39     | T C A C T T G T A T | T T G T A G G A G T | A T A G T A G A G T | G T A T T C C T G T | T G T A A G T A C A |
| CWL029   | T C A C T T G T A T | T T G T A G G A G T | A T A G T A G A G T | G T A T T C C T G T | T G T A A G T A C A |
| J138     | T C A C T T G T A T | T T G T A G G A G T | A T A G T A G A G T | G T A T T C C T G T | T G T A A G T A C A |
| TW183    | T C A C T T G T A T | T T G T A G G A G T | A T A G T A G A G T | G T A T T C C T G T | T G T A A G T A C A |
| TOR1     | T C A C T T G T A T | T T G T A G G A G T | A T A G T A G A G T | G T A T T C C T G T | T G T A A G T A C A |
| WA97001  | T C A C T T G T A T | T T G T A G G A G T | A T A G T A G A G T | G T A T T C C T G T | T G T A A G T A C A |
| 1979     | T C A C T T G T A T | T T G T A G G A G T | A T A G T A G A G T | G T A T T C C T G T | T G T A A G T A C A |
| SH511    | T C A C T T G T A T | T T G T A G G A G T | A T A G T A G A G T | G T A T T C C T G T | T G T A A G T A C A |

| Identity | 360                 | 370                 | 380                 | 390                 | 400                 |
|----------|---------------------|---------------------|---------------------|---------------------|---------------------|
| DE177    | T T A T T T G G T A | T C G G A C G A T T | T T G T G C T G T G | T G G T G C G T T G | A A G G T T T C T C |
| N16      | T T G T T T G G T G | T C G G A C G A T T | T T G T G C T G T G | T G G T G C G T T G | A A G G T T T C T C |
| AR39     | T T A T T T G G T A | T C G G A C G A T T | T T G T G C T G T G | T G G T G C G T T G | A A G G T T T C T C |
| CWL029   | T T A T T T G G T A | T C G G A C G A T T | T T G T G C T G T G | T G G T G C G T T G | A A G G T T T C T C |
| J138     | T T A T T T G G T A | T C G G A C G A T T | T T G T G C T G T G | T G G T G C G T T G | A A G G T T T C T C |
| TW183    | T T A T T T G G T A | T C G G A C G A T T | T T G T G C T G T G | T G G T G C G T T G | A A G G T T T C T C |
| TOR1     | T T A T T T G G T A | T C G G A C G A T T | T T G T G C T G T G | T G G T G C G T T G | A A G G T T T C T C |
| WA97001  | T T A T T T G G T A | T C G G A C G A T T | T T G T G C T G T G | T G G T G C G T T G | A A G G T T T C T C |
| 1979     | T T A T T T G G T A | T C G G A C G A T T | T T G T G C T G T G | T G G T G C G T T G | A A G G T T T C T C |
| SH511    | T T A T T T G G T A | T C G G A C G A T T | T T G T G C T G T G | T G G T G C G T T G | A A G G T T T C T C |

|          | 410                                                                              | 420        | 430        | 440        | 450        |
|----------|----------------------------------------------------------------------------------|------------|------------|------------|------------|
| Identity |  |            |            |            |            |
| DE177    | AGGCTCTACG                                                                       | TTTGATAAGA | TCTATCATAC | AATTGTCGCC | GTTCTAGGAA |
| N16      | AGGCTCTACG                                                                       | TTTGATAAGA | TCTATCATAC | AATTGTCGCC | GTTCTAGGAA |
| AR39     | AGGCTCTACG                                                                       | TTTGATAAGA | TCTATCATAC | AATTGTCGCC | GTTCTAGGAA |
| CWL029   | AGGCTCTACG                                                                       | TTTGATAAGA | TCTATCATAC | AATTGTCGCC | GTTCTAGGAA |
| J138     | AGGCTCTACG                                                                       | TTTGATAAGA | TCTATCATAC | AATTGTCGCC | GTTCTAGGAA |
| TW183    | AGGCTCTACG                                                                       | TTTGATAAGA | TCTATCATAC | AATTGTCGCC | GTTCTAGGAA |
| TOR1     | AGGCTCTACG                                                                       | TTTGATAAGA | TCTATCATAC | AATTGTCGCC | GTTCTAGGAA |
| WA97001  | AGGCTCTACG                                                                       | TTTGATAAGA | TCTATCATAC | AATTGTCGCC | GTTCTAGGAA |
| 1979     | AGGCTCTACG                                                                       | TTTGATAAGA | TCTATCATAC | AATTGTCGCC | GTTCTAGGAA |
| SH511    | AGGCTCTACG                                                                       | TTTGATAAGA | TCTATCATAC | AATTGTCGCC | GTTCTAGGAA |

|          | 460                                                                                | 470        | 480         | 490        |             |
|----------|------------------------------------------------------------------------------------|------------|-------------|------------|-------------|
| Identity |  |            |             |            |             |
| DE177    | TTC TTGG TTT                                                                       | GGGAATTCTT | ACGTTCA TTT | TAAGAATTAT | TTTTTCTG TG |
| N16      | TTC TTGG TTT                                                                       | GGGAATTCTT | ACGTTCA TTT | TAAGAATTAT | TTTTTCTG TG |
| AR39     | TTC TTGG TTT                                                                       | GGGAATTCTT | ACGTTCA TTT | TAAGAATTAT | TTTTTCTG TG |
| CWL029   | TTC TTGG TTT                                                                       | GGGAATTCTT | ACGTTCA TTT | TAAGAATTAT | TTTTTCTG TG |
| J138     | TTC TTGG TTT                                                                       | GGGAATTCTT | ACGTTCA TTT | TAAGAATTAT | TTTTTCTG TG |
| TW183    | TTC TTGG TTT                                                                       | GGGAATTCTT | ACGTTCA TTT | TAAGAATTAT | TTTTTCTG TG |
| TOR1     | TTC TTGG TTT                                                                       | GGGAATTCTT | ACGTTCA TTT | TAAGAATTAT | TTTTTCTG TG |
| WA97001  | TTC TTGG TTT                                                                       | GGGAATTCTT | ACGTTCA TTT | TAAGAATTAT | TTTTTCTG TG |
| 1979     | TTC TTGG TTT                                                                       | GGGAATTCTT | ACGTTCA TTT | TAAGAATTAT | TTTTTCTG TG |
| SH511    | TTC TTGG TTT                                                                       | GGGAATTCTT | ACGTTCA TTT | TAAGAATTAT | TTTTTCTG TG |

|          | 505                                                                                 |
|----------|-------------------------------------------------------------------------------------|
| Identity |  |
| DE177    | CTTAT                                                                               |
| N16      | CTTAT                                                                               |
| AR39     | CTTAT                                                                               |
| CWL029   | CTTAT                                                                               |
| J138     | CTTAT                                                                               |
| TW183    | CTTAT                                                                               |
| TOR1     | CTTAT                                                                               |
| WA97001  | CTTAT                                                                               |
| 1979     | CTTAT                                                                               |
| SH511    | CTTAT                                                                               |

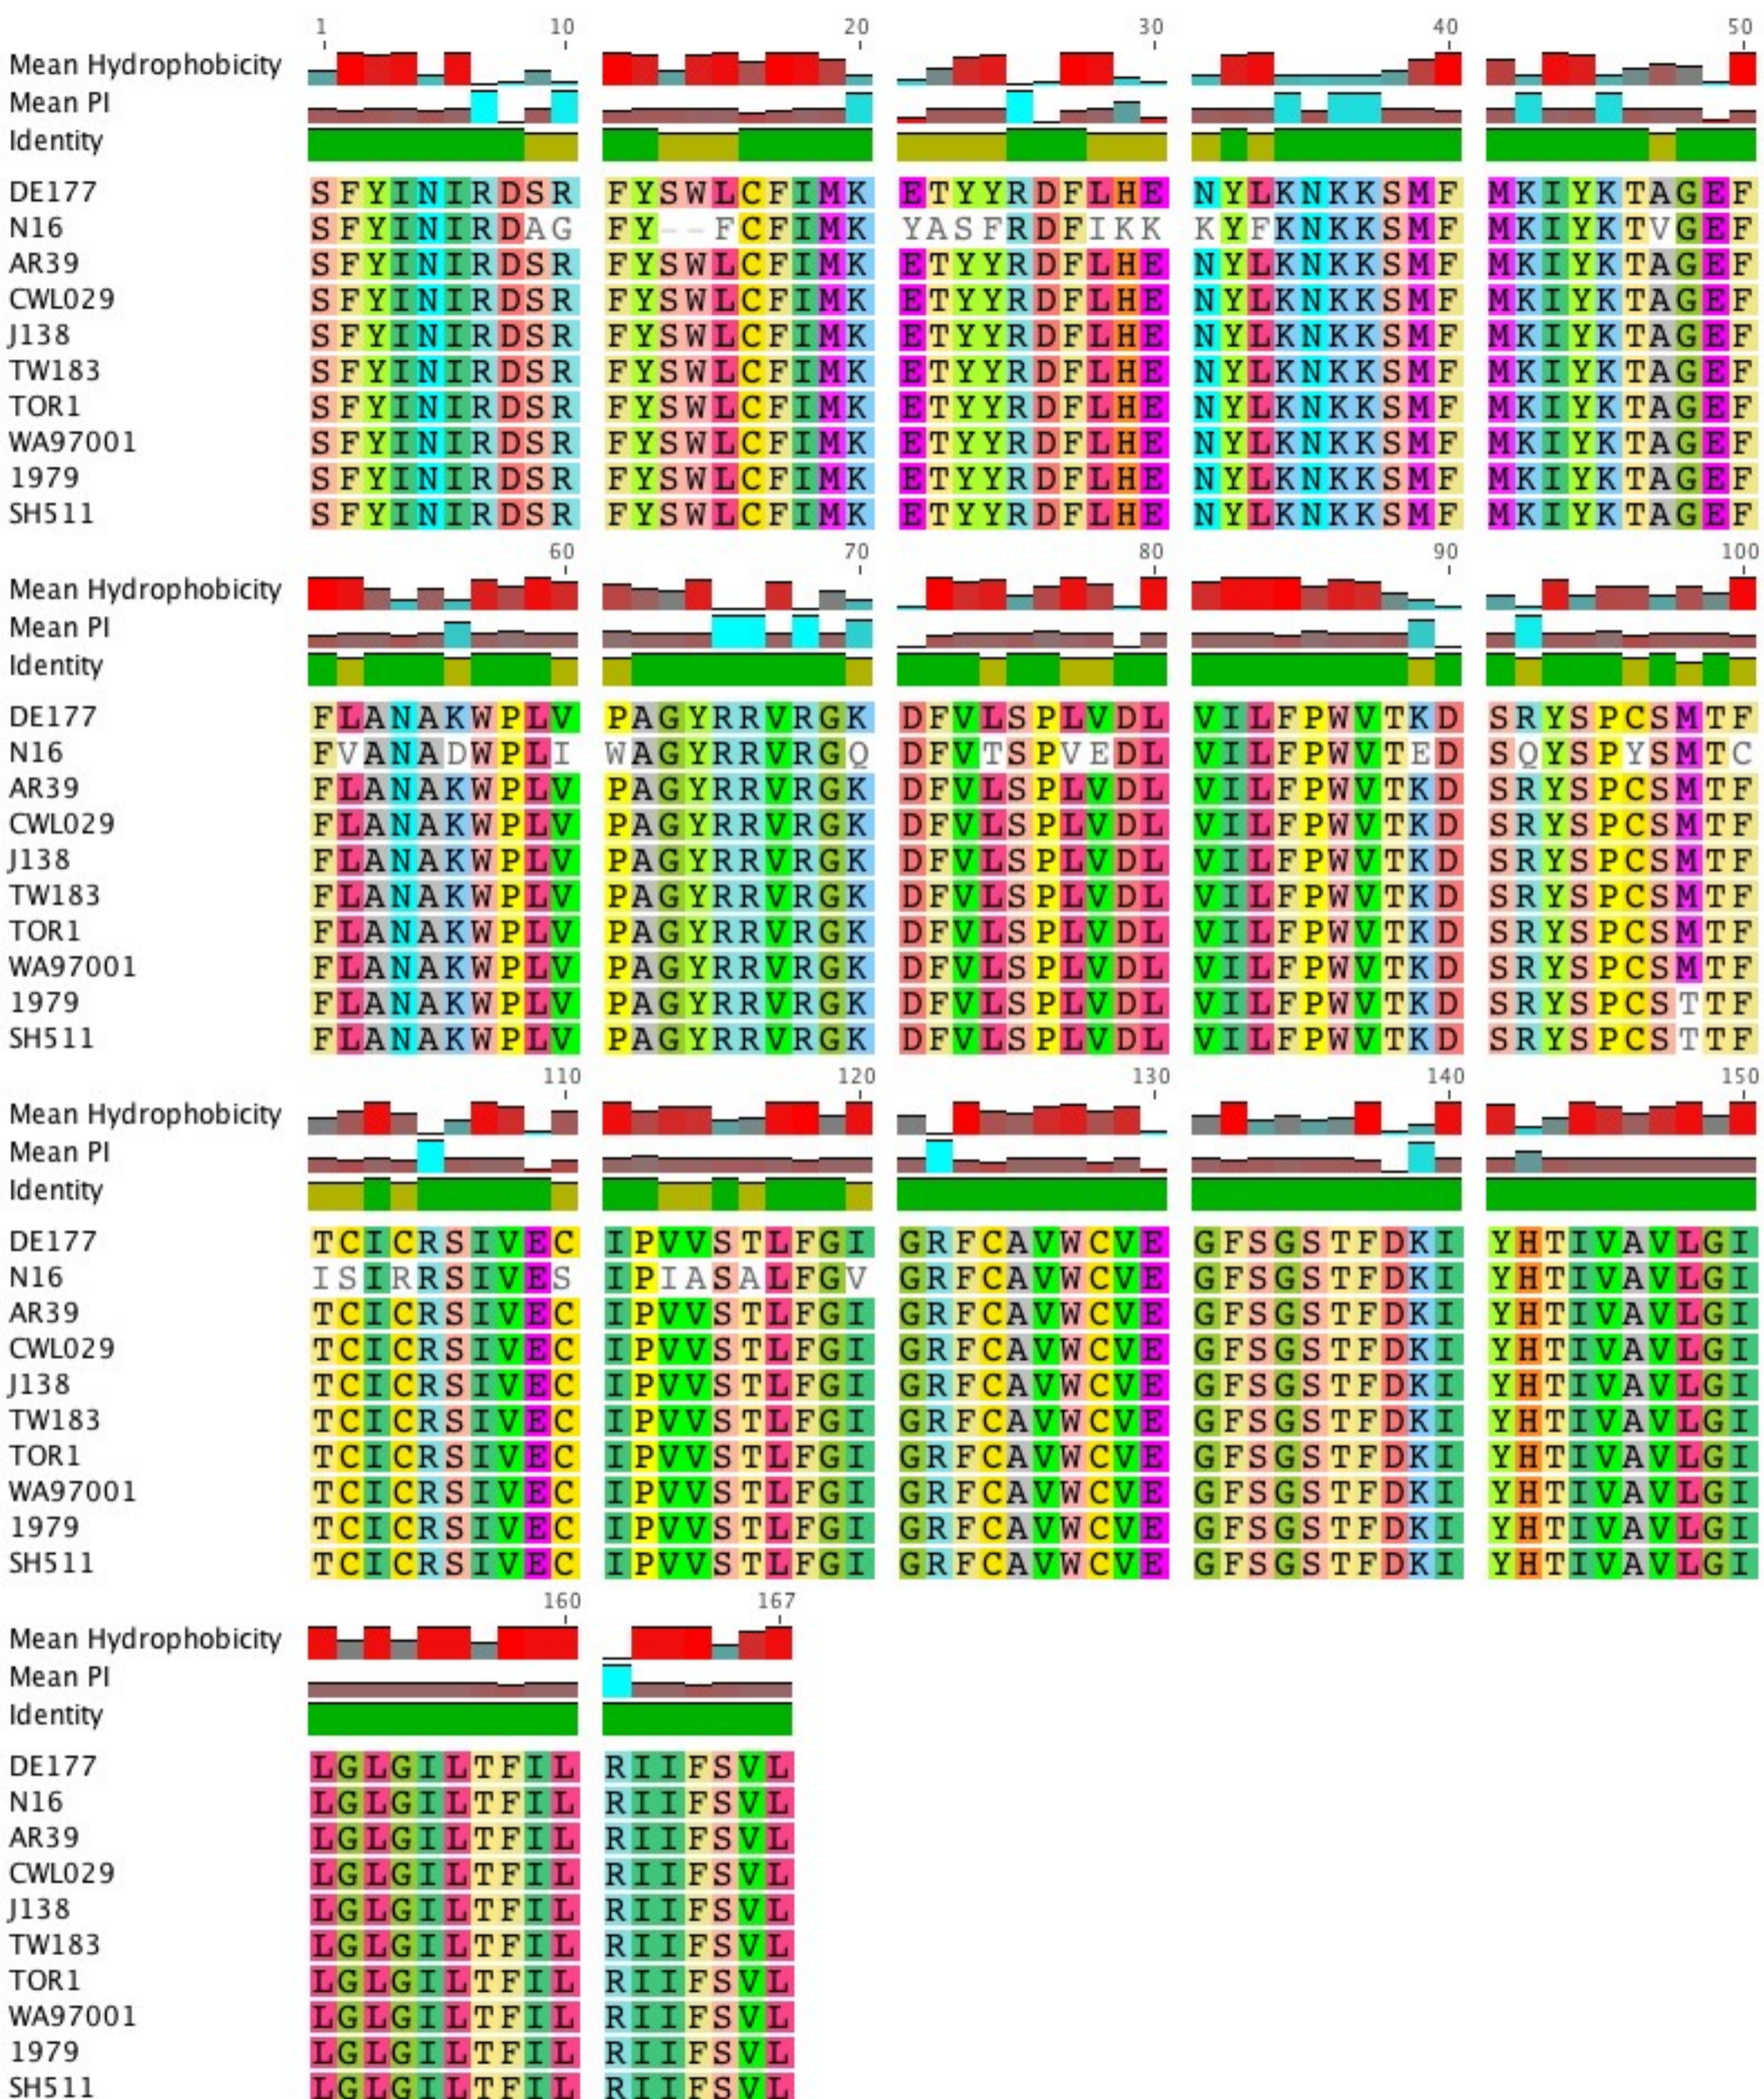

Supplement: ppat.1000903.s012.pdf [file ppat.1000903.s012.pdf]
