# Supplementary material for: Chlamydia pneumoniae Is Genetically Diverse in Animals and Appears to Have Crossed the Host Barrier to Humans on (At Least) Two Occasions
Source: PubMed Central journal article supplement (PMC2873915; doi:10.1371/journal.ppat.1000903), 2010-05-20

| Identity | 1                                        | 10                                   | 20                                                                   | 30                                              | 40                                     | 50 |
|----------|------------------------------------------|--------------------------------------|----------------------------------------------------------------------|-------------------------------------------------|----------------------------------------|----|
| B26      | TAA TCCG <b>C</b> TG                     | TTTCTT <b>G</b> CAC                  | <b>G</b> CTAGG TTTA                                                  | AA TG TA <b>C</b> TTG                           | GAA <b>T</b> <b>C</b> GCGA T           |    |
| EBB      | TAA TCCG <b>C</b> TG                     | TTTCTT <b>G</b> CAC                  | <b>G</b> CTAGG TTTA                                                  | AA TG TA <b>C</b> TTG                           | GAA <b>T</b> <b>C</b> GCGA T           |    |
| LPCoLN   | TAA TCCG <b>C</b> TG                     | TTTCTT <b>G</b> CAC                  | <b>G</b> CTAGG TTTA                                                  | AA TG TA <b>C</b> TTG                           | GAA <b>T</b> <b>C</b> GCGA T           |    |
| AR39     | TAA TCCG TTG                             | TTTCTTACAC                           | TCTAGG TTTA                                                          | AA TG TAA TTG                                   | GAAA TGCGA T                           |    |
| CWL029   | TAA TCCG TTG                             | TTTCTTACAC                           | TCTAGG TTTA                                                          | AA TG TAA TTG                                   | GAAA TGCGA T                           |    |
| J138     | TAA TCCG TTG                             | TTTCTTACAC                           | TCTAGG TTTA                                                          | AA TG TAA TTG                                   | GAAA TGCGA T                           |    |
| TW183    | TAA TCCG TTG                             | TTTCTTACAC                           | TCTAGG TTTA                                                          | AA TG TAA TTG                                   | GAAA TGCGA T                           |    |
| TOR1     | TAA TCCG TTG                             | TTTCTTACAC                           | TCTAGG TTTA                                                          | AA TG TAA TTG                                   | GAAA TGCGA T                           |    |
| WA97001  | TAA TCCG TTG                             | TTTCTTACAC                           | TCTAGG TTTA                                                          | AA TG TAA TTG                                   | GAAA TGCGA T                           |    |
| 1979     | TAA TCCG TTG                             | TTTCTTACAC                           | TCTAGG TTTA                                                          | AA TG TAA TTG                                   | GAAA TGCGA T                           |    |
| SH511    | TAA TCCG TTG                             | TTTCTTACAC                           | TCTAGG TTTA                                                          | AA TG TAA TTG                                   | GAAA TGCGA T                           |    |
| Identity | 60                                       | 70                                   | 80                                                                   | 90                                              | 100                                    |    |
| B26      | TCTCTAA <b>T</b> TG                      | AC <b>T</b> CAAGAGT                  | CCCC <b>T</b> <b>C</b> CGAC                                          | G <b>T</b> <b>T</b> <b>C</b> <b>G</b> A C C T T | T <b>C</b> <b>A</b> T G A <b>C</b> T T |    |
| EBB      | TCTCTAA <b>T</b> TG                      | AC <b>T</b> CAAGAGT                  | CCCC <b>T</b> <b>C</b> CGAC                                          | G <b>T</b> <b>T</b> <b>C</b> <b>G</b> A C C T T | T <b>C</b> <b>A</b> T G A <b>C</b> T T |    |
| LPCoLN   | TCTCTAA <b>T</b> TG                      | AC <b>T</b> CAAGAGT                  | CCCC <b>T</b> <b>C</b> CGAC                                          | G <b>T</b> <b>T</b> <b>C</b> <b>G</b> A C C T T | T <b>C</b> <b>A</b> T G A <b>C</b> T T |    |
| AR39     | TCTCTAAGTG                               | ACGCAAGAGT                           | CCCCACGAC                                                            | G <b>T</b> <b>T</b> <b>C</b> <b>A</b> A C C T T | T <b>C</b> <b>A</b> A T G A T T T      |    |
| CWL029   | TCTCTAAGTG                               | ACGCAAGAGT                           | CCCCACGAC                                                            | G <b>T</b> <b>T</b> <b>C</b> <b>A</b> A C C T T | T <b>C</b> <b>A</b> A T G A T T T      |    |
| J138     | TCTCTAAGTG                               | ACGCAAGAGT                           | CCCCACGAC                                                            | G <b>T</b> <b>T</b> <b>C</b> <b>A</b> A C C T T | T <b>C</b> <b>A</b> A T G A T T T      |    |
| TW183    | TCTCTAAGTG                               | ACGCAAGAGT                           | CCCCACGAC                                                            | G <b>T</b> <b>T</b> <b>C</b> <b>A</b> A C C T T | T <b>C</b> <b>A</b> A T G A T T T      |    |
| TOR1     | TCTCTAAGTG                               | ACGCAAGAGT                           | CCCCACGAC                                                            | G <b>T</b> <b>T</b> <b>C</b> <b>A</b> A C C T T | T <b>C</b> <b>A</b> A T G A T T T      |    |
| WA97001  | TCTCTAAGTG                               | ACGCAAGAGT                           | CCCCACGAC                                                            | G <b>T</b> <b>T</b> <b>C</b> <b>A</b> A C C T T | T <b>C</b> <b>A</b> A T G A T T T      |    |
| 1979     | TCTCTAAGTG                               | ACGCAAGAGT                           | CCCCACGAC                                                            | G <b>T</b> <b>T</b> <b>C</b> <b>A</b> A C C T T | T <b>C</b> <b>A</b> A T G A T T T      |    |
| SH511    | TCTCTAAGTG                               | ACGCAAGAGT                           | CCCCACGAC                                                            | G <b>T</b> <b>T</b> <b>C</b> <b>A</b> A C C T T | T <b>C</b> <b>A</b> A T G A T T T      |    |
| Identity | 110                                      | 120                                  | 130                                                                  | 140                                             | 150                                    |    |
| B26      | <b>T</b> <b>C</b> <b>G</b> A C T T T T C | AA TAA TCAGG                         | AGAGGCT <b>G</b> AA                                                  | TATA TGGAAA                                     | AA TCGGA <b>T</b> A T                  |    |
| EBB      | <b>T</b> <b>C</b> <b>G</b> A C T T T T C | AA TAA TCAGG                         | AGAGGCT <b>G</b> AA                                                  | TATA TGGAAA                                     | AA TCGGA <b>T</b> A T                  |    |
| LPCoLN   | <b>T</b> <b>C</b> <b>G</b> A C T T T T C | AA TAA TCAGG                         | AGAGGCT <b>G</b> AA                                                  | TATA TGGAAA                                     | AA TCGGA <b>T</b> A T                  |    |
| AR39     | CCAACTTTTC                               | AA TAA TCAGG                         | AGAGGCTAAA                                                           | TATA TGGAAA                                     | AA TCGGAGAT                            |    |
| CWL029   | CCAACTTTTC                               | AA TAA TCAGG                         | AGAGGCTAAA                                                           | TATA TGGAAA                                     | AA TCGGAGAT                            |    |
| J138     | CCAACTTTTC                               | AA TAA TCAGG                         | AGAGGCTAAA                                                           | TATA TGGAAA                                     | AA TCGGAGAT                            |    |
| TW183    | CCAACTTTTC                               | AA TAA TCAGG                         | AGAGGCTAAA                                                           | TATA TGGAAA                                     | AA TCGGAGAT                            |    |
| TOR1     | CCAACTTTTC                               | AA TAA TCAGG                         | AGAGGCTAAA                                                           | TATA TGGAAA                                     | AA TCGGAGAT                            |    |
| WA97001  | CCAACTTTTC                               | AA TAA TCAGG                         | AGAGGCTAAA                                                           | TATA TGGAAA                                     | AA TCGGAGAT                            |    |
| 1979     | CCAACTTTTC                               | AA TAA TCAGG                         | AGAGGCTAAA                                                           | TATA TGGAAA                                     | AA TCGGAGAT                            |    |
| SH511    | CCAACTTTTC                               | AA TAA TCAGG                         | AGAGGCTAAA                                                           | TATA TGGAAA                                     | AA TCGGAGAT                            |    |
| Identity | 160                                      | 170                                  | 180                                                                  | 190                                             | 200                                    |    |
| B26      | A TG TCTCTGG                             | <b>A</b> <b>G</b> TAGA <b>C</b> G TG | C <b>T</b> <b>T</b> <b>G</b> T <b>A</b> <b>G</b> <b>C</b> A T        | CGGTCGATTA                                      | TCTCA <b>A</b> A T <b>C</b> <b>C</b>   |    |
| EBB      | A TG TCTCTGG                             | <b>A</b> <b>G</b> TAGA <b>C</b> G TG | C <b>T</b> <b>T</b> <b>G</b> T <b>A</b> <b>G</b> <b>C</b> A T        | CGGTCGATTA                                      | TCTCA <b>A</b> A T <b>C</b> <b>C</b>   |    |
| LPCoLN   | A TG TCTCTGG                             | <b>A</b> <b>G</b> TAGA <b>C</b> G TG | C <b>T</b> <b>T</b> <b>G</b> T <b>A</b> <b>G</b> <b>C</b> A T        | CGGTCGATTA                                      | TCTCA <b>A</b> A T <b>C</b> <b>C</b>   |    |
| AR39     | A TG TCTCTGG                             | AA TAGATG TG                         | C <b>T</b> <b>T</b> <b>A</b> T <b>G</b> <b>G</b> T <b>G</b> <b>C</b> | CGGTCGATTA                                      | TCTCAGATCT                             |    |
| CWL029   | A TG TCTCTGG                             | AA TAGATG TG                         | C <b>T</b> <b>T</b> <b>A</b> T <b>G</b> <b>G</b> T <b>G</b> <b>C</b> | CGGTCGATTA                                      | TCTCAGATCT                             |    |
| J138     | A TG TCTCTGG                             | AA TAGATG TG                         | C <b>T</b> <b>T</b> <b>A</b> T <b>G</b> <b>G</b> T <b>G</b> <b>C</b> | CGGTCGATTA                                      | TCTCAGATCT                             |    |
| TW183    | A TG TCTCTGG                             | AA TAGATG TG                         | C <b>T</b> <b>T</b> <b>A</b> T <b>G</b> <b>G</b> T <b>G</b> <b>C</b> | CGGTCGATTA                                      | TCTCAGATCT                             |    |
| TOR1     | A TG TCTCTGG                             | AA TAGATG TG                         | C <b>T</b> <b>T</b> <b>A</b> T <b>G</b> <b>G</b> T <b>G</b> <b>C</b> | CGGTCGATTA                                      | TCTCAGATCT                             |    |
| WA97001  | A TG TCTCTGG                             | AA TAGATG TG                         | C <b>T</b> <b>T</b> <b>A</b> T <b>G</b> <b>G</b> T <b>G</b> <b>C</b> | CGGTCGATTA                                      | TCTCAGATCT                             |    |
| 1979     | A TG TCTCTGG                             | AA TAGATG TG                         | C <b>T</b> <b>T</b> <b>A</b> T <b>G</b> <b>G</b> T <b>G</b> <b>C</b> | CGGTCGATTA                                      | TCTCAGATCT                             |    |
| SH511    | A TG TCTCTGG                             | AA TAGATG TG                         | C <b>T</b> <b>T</b> <b>A</b> T <b>G</b> <b>G</b> T <b>G</b> <b>C</b> | CGGTCGATTA                                      | TCTCAGATCT                             |    |

Identity  210 220 230 240 250

|         |                    |                     |                           |            |                    |
|---------|--------------------|---------------------|---------------------------|------------|--------------------|
| B26     | CAGTTTTCCTG        | GTTTTTAA <b>CCA</b> | <b>CA</b> TTCCA <b>AA</b> | GCTATCCGTT | GCGAAAAC <b>TA</b> |
| EBB     | CAGTTTTCCTG        | GTTTTTAA <b>CCA</b> | <b>CA</b> TTCCA <b>AA</b> | GCTATCCGTT | GCGAAAAC <b>TA</b> |
| LPCoLN  | CAGTTTTCCTG        | GTTTTTAA <b>CCA</b> | <b>CA</b> TTCCA <b>AA</b> | GCTATCCGTT | GCGAAAAC <b>TA</b> |
| AR39    | CAGTTTCCCG         | GTTTTTAAGGA         | GATTCCAGAA                | GCTATCCGTT | GCGAAAAC <b>TA</b> |
| CWL029  | CAGTTTCCCG         | GTTTTTAAGGA         | GATTCCAGAA                | GCTATCCGTT | GCGAAAAC <b>TA</b> |
| J138    | CAGTTTCCCG         | GTTTTTAAGGA         | GATTCCAGAA                | GCTATCCGTT | GCGAAAAC <b>TA</b> |
| TW183   | CAGTTTCCCG         | GTTTTTAAGGA         | GATTCCAGAA                | GCTATCCGTT | GCGAAAAC <b>TA</b> |
| TOR1    | CAGTTTCCCG         | GTTTTTAAGGA         | GATTCCAGAA                | GCTATCCGTT | GCGAAAAC <b>TA</b> |
| WA97001 | CAGTTTCCCG         | GTTTTTAAGGA         | GATTCCAGAA                | GCTATCCGTT | GCGAAAAC <b>TA</b> |
| 1979    | CAGTTTCC <b>TG</b> | GTTTTTAAGGA         | GATTCCAGAA                | GCTATCCGTT | GCGAAAAC <b>TA</b> |
| SH511   | CAGTTTCC <b>TG</b> | GTTTTTAAGGA         | GATTCCAGAA                | GCTATCCGTT | GCGAAAAC <b>TA</b> |

Identity  260 270 280 290 300

|         |                     |            |                    |                    |            |
|---------|---------------------|------------|--------------------|--------------------|------------|
| B26     | TGTAAG <b>AA</b> AT | GGTCAGTTTT | CTGAAGAA <b>GG</b> | TAAAA <b>AGAGT</b> | TATCTTAGAG |
| EBB     | TGTAAG <b>AA</b> AT | GGTCAGTTTT | CTGAAGAA <b>GG</b> | TAAAA <b>AGAGT</b> | TATCTTAGAG |
| LPCoLN  | TGTAAG <b>AA</b> AT | GGTCAGTTTT | CTGAAGAA <b>GG</b> | TAAAA <b>AGAGT</b> | TATCTTAGAG |
| AR39    | TGTAAGTGAT          | GGTCAGTTTT | CTGAAGAAAG         | TAAAA <b>CAAGC</b> | TATCTTAGAG |
| CWL029  | TGTAAGTGAT          | GGTCAGTTTT | CTGAAGAAAG         | TAAAA <b>CAAGC</b> | TATCTTAGAG |
| J138    | TGTAAGTGAT          | GGTCAGTTTT | CTGAAGAAAG         | TAAAA <b>CAAGC</b> | TATCTTAGAG |
| TW183   | TGTAAGTGAT          | GGTCAGTTTT | CTGAAGAAAG         | TAAAA <b>CAAGC</b> | TATCTTAGAG |
| TOR1    | TGTAAGTGAT          | GGTCAGTTTT | CTGAAGAAAG         | TAAAA <b>CAAGC</b> | TATCTTAGAG |
| WA97001 | TGTAAGTGAT          | GGTCAGTTTT | CTGAAGAAAG         | TAAAA <b>CAAGC</b> | TATCTTAGAG |
| 1979    | TGTAAGTGAT          | GGTCAGTTTT | CTGAAGAAAG         | TAAAA <b>CAAGC</b> | TATCTTAGAG |
| SH511   | TGTAAGTGAT          | GGTCAGTTTT | CTGAAGAAAG         | TAAAA <b>CAAGC</b> | TATCTTAGAG |

Identity  310 320 330 340 350

|         |                    |                    |            |                      |            |
|---------|--------------------|--------------------|------------|----------------------|------------|
| B26     | <b>G</b> GATGCTGAC | <b>CA</b> CAATTGTT | GGGTATATCT | TGTCAG <b>G</b> TAGA | TGAGACCTAT |
| EBB     | <b>G</b> GATGCTGAC | <b>CA</b> CAATTGTT | GGGTATATCT | TGTCAG <b>G</b> TAGA | TGAGACCTAT |
| LPCoLN  | <b>G</b> GATGCTGAC | <b>CA</b> CAATTGTT | GGGTATATCT | TGTCAG <b>G</b> TAGA | TGAGACCTAT |
| AR39    | CGATGCTGAC         | CGACATTGTT         | GGGTATATCT | TGTCATTAGA           | TGAGACCTAT |
| CWL029  | CGATGCTGAC         | CGACATTGTT         | GGGTATATCT | TGTCATTAGA           | TGAGACCTAT |
| J138    | CGATGCTGAC         | CGACATTGTT         | GGGTATATCT | TGTCATTAGA           | TGAGACCTAT |
| TW183   | CGATGCTGAC         | CGACATTGTT         | GGGTATATCT | TGTCATTAGA           | TGAGACCTAT |
| TOR1    | CGATGCTGAC         | CGACATTGTT         | GGGTATATCT | TGTCATTAGA           | TGAGACCTAT |
| WA97001 | CGATGCTGAC         | CGACATTGTT         | GGGTATATCT | TGTCATTAGA           | TGAGACCTAT |
| 1979    | CGATGCTGAC         | CGACATTGTT         | GGGTATATCT | TGTCATTAGA           | TGAGACCTAT |
| SH511   | CGATGCTGAC         | CGACATTGTT         | GGGTATATCT | TGTCATTAGA           | TGAGACCTAT |

Identity  360 370 380 390 400

|         |                     |            |                     |                             |                            |
|---------|---------------------|------------|---------------------|-----------------------------|----------------------------|
| B26     | TGG <b>GAGG</b> ATG | TGATCCTCAA | GATCC <b>CTG</b> CG | ATG <b>AA</b> CATC <b>C</b> | <b>TTAG</b> CGAA <b>GC</b> |
| EBB     | TGG <b>GAGG</b> ATG | TGATCCTCAA | GATCC <b>CTG</b> CG | ATG <b>AA</b> CATC <b>C</b> | <b>TTAG</b> CGAA <b>GC</b> |
| LPCoLN  | TGG <b>GAGG</b> ATG | TGATCCTCAA | GATCC <b>CTG</b> CG | ATG <b>AA</b> CATC <b>C</b> | <b>TTAG</b> CGAA <b>GC</b> |
| AR39    | TGGACGAA <b>TG</b>  | TGATCCTCAA | GATCCGTGCG          | ATGTGCATCA                  | CCTTCGAAAG                 |
| CWL029  | TGGACGAA <b>TG</b>  | TGATCCTCAA | GATCCGTGCG          | ATGTGCATCA                  | CCTTCGAAAG                 |
| J138    | TGGACGAA <b>TG</b>  | TGATCCTCAA | GATCCGTGCG          | ATGTGCATCA                  | CCTTCGAAAG                 |
| TW183   | TGGACGAA <b>TG</b>  | TGATCCTCAA | GATCCGTGCG          | ATGTGCATCA                  | CCTTCGAAAG                 |
| TOR1    | TGGACGAA <b>TG</b>  | TGATCCTCAA | GATCCGTGCG          | ATGTGCATCA                  | CCTTCGAAAG                 |
| WA97001 | TGGACGAA <b>TG</b>  | TGATCCTCAA | GATCCGTGCG          | ATGTGCATCA                  | CCTTCGAAAG                 |
| 1979    | TGGACGAA <b>TG</b>  | TGATCCTCAA | GATCCGTGCG          | ATGTGCATCA                  | CCTTCGAAAG                 |
| SH511   | TGGACGAA <b>TG</b>  | TGATCCTCAA | GATCCGTGCG          | ATGTGCATCA                  | CCTTCGAAAG                 |

Identity 

|         | 410        | 420        | 430        | 440         | 450        |
|---------|------------|------------|------------|-------------|------------|
| B26     | TGCGTATTCT | CGAAGGTGTA | CAACCGACCC | TAACTATCAA  | CACACCGGAG |
| EBB     | TGCGTATTCT | CGAAGGTGTA | CAACCGACCC | TAACTATCAA  | CACACCGGAG |
| LPCoLN  | TGCGTATTCT | CGAAGGTGTA | CAACCGACCC | TAACTATCAA  | CACACCGGAG |
| AR39    | TTTCC---CT | GGAAAAGAAG | CA---GACCC | TAACTATTTCC | CCTCGCGTAA |
| CWL029  | TTTCC---CT | GGAAAAGAAG | CA---GACCC | TAACTATTTCC | CCTCGCGTAA |
| J138    | TTTCC---CT | GGAAAAGAAG | CA---GACCC | TAACTATTTCC | CCTCGCGTAA |
| TW183   | TTTCC---CT | GGAAAAGAAG | CA---GACCC | TAACTATTTCC | CCTCGCGTAA |
| TOR1    | TTTCC---CT | GGAAAAGAAG | CA---GACCC | TAACTATTTCC | CCTCGCGTAA |
| WA97001 | TTTCC---CT | GGAAAAGAAG | CA---GACCC | TAACTATTTCC | CCTCGCGTAA |
| 1979    | TTTCC---CT | GGAAAAGAAG | CA---GACCC | TAACTATTTCC | CCTCGCGCAA |
| SH511   | TTTCC---CT | GGAAAAGAAG | CA---GACCC | TAACTATTTCC | CCTCGCGCAA |

Identity 

|         | 460        | 470        | 480         | 490        | 500       |
|---------|------------|------------|-------------|------------|-----------|
| B26     | TTTACCCTT  | TCTTGATAA  | TCTTTCAGG   | TACCTGCGCG | ACATGATTA |
| EBB     | TTTACCCTT  | TCTTGATAA  | TCTTTCAGG   | TACCTGCGCG | ACATGATTA |
| LPCoLN  | TTTACCCTT  | TCTTGATAA  | TCTTTCAGG   | TACCTGCGCG | ACATGATTA |
| AR39    | CTCACCACTA | TTTTGATGAA | TCTTGGAAAGG | CACTTGC    | ACATGATTA |
| CWL029  | CTCACCACTA | TTTTGATGAA | TCTTGGAAAGG | CACTTGC    | ACATGATTA |
| J138    | CTCACCACTA | TTTTGATGAA | TCTTGGAAAGG | CACTTGC    | ACATGATTA |
| TW183   | CTCACCACTA | TTTTGATGAA | TCTTGGAAAGG | CACTTGC    | ACATGATTA |
| TOR1    | CTCACCACTA | TTTTGATGAA | TCTTGGAAAGG | CACTTGC    | ACATGATTA |
| WA97001 | CTCACCACTA | TTTTGATGAA | TCTTGGAAAGG | CACTTGC    | ACATGATTA |
| 1979    | CTCACCACTA | TTTTGATGAA | TCTTGGAAAGG | CACTTGC    | ACATGATTA |
| SH511   | CTCACCACTA | TTTTGATGAA | TCTTGGAAAGG | CACTTGC    | ACATGATTA |

Identity 

|         | 510        | 520        | 530        | 540        | 550        |
|---------|------------|------------|------------|------------|------------|
| B26     | GGGGAAGGTA | ACATGCTGAA | TACAGCAAG  | TGGATGCACA | TTCGTGCAGA |
| EBB     | GGGGAAGGTA | ACATGCTGAA | TACAGCAAG  | TGGATGCACA | TTCGTGCAGA |
| LPCoLN  | GGGGAAGGTA | ACATGCTGAA | TACAGCAAG  | TGGATGCACA | TTCGTGCAGA |
| AR39    | GGAGAAGGTA | ACATGGTGAA | TAGACTAGAT | GAGGCGCTAA | TTCGTACAGA |
| CWL029  | GGAGAAGGTA | ACATGGTGAA | TAGACTAGAT | GAGGCGCTAA | TTCGTACAGA |
| J138    | GGAGAAGGTA | ACATGGTGAA | TAGACTAGAT | GAGGCGCTAA | TTCGTACAGA |
| TW183   | GGAGAAGGTA | ACATGGTGAA | TAGACTAGAT | GAGGCGCTAA | TTCGTACAGA |
| TOR1    | GGAGAAGGTA | ACATGGTGAA | TAGACTAGAT | GAGGCGCTAA | TTCGTACAGA |
| WA97001 | GGAGAAGGTA | ACATGGTGAA | TAGACTAGAT | GAGGCGCTAA | TTCGTACAGA |
| 1979    | GGAGAAGGTA | ACATGGTGAA | TAGACTAGAT | GAGGCGCTAA | TTCGTACAGA |
| SH511   | GGAGAAGGTA | ACATGGTGAA | TAGACTAGAT | GAGGCGCTAA | TTCGTACAGA |

Identity 

|         | 560        | 570        | 580          | 590        | 600        |
|---------|------------|------------|--------------|------------|------------|
| B26     | GCGGCCGGGC | AAAGAAGGGG | AA TGTA TTGC | GAAACAGTTT | TTAAAAGATT |
| EBB     | GCGGCCGGGC | AAAGAAGGGG | AA TGTA TTGC | GAAACAGTTT | TTAAAAGATT |
| LPCoLN  | GCGGCCGGGC | AAAGAAGGGG | AA TGTA TTGC | GAAACAGTTT | TTAAAAGATT |
| AR39    | GAAGCCGGGC | AAAGAAGGGG | AA TGTA TTAC | GAAACAGTTT | TTAAAAGATT |
| CWL029  | GAAGCCGGGC | AAAGAAGGGG | AA TGTA TTAC | GAAACAGTTT | TTAAAAGATT |
| J138    | GAAGCCGGGC | AAAGAAGGGG | AA TGTA TTAC | GAAACAGTTT | TTAAAAGATT |
| TW183   | GAAGCCGGGC | AAAGAAGGGG | AA TGTA TTAC | GAAACAGTTT | TTAAAAGATT |
| TOR1    | GAAGCCGGGC | AAAGAAGGGG | AA TGTA TTAC | GAAACAGTTT | TTAAAAGATT |
| WA97001 | GAAGCCGGGC | AAAGAAGGGG | AA TGTA TTAC | GAAACAGTTT | TTAAAAGATT |
| 1979    | GAAGCCGGGC | AAAGAAGGGG | AA TGTA TTAC | GAAACAGTTT | TTAAAAGATT |
| SH511   | GAAGCCGGGC | AAAGAAGGGG | AA TGTA TTAC | GAAACAGTTT | TTAAAAGATT |



| Identity | 810                 | 820                 | 830         | 840                 | 845   |
|----------|---------------------|---------------------|-------------|---------------------|-------|
| B26      | TTCACCTATG <b>T</b> | GTGGT <b>G</b> ACCA | AGTTTTTATTT | TATACC <b>G</b> TCT | TTTCT |
| EBB      | TTCACCTATG <b>T</b> | GTGGT <b>G</b> ACCA | AGTTTTTATTT | TATACC <b>G</b> TCT | TTTCT |
| LPCoLN   | TTCACCTATG <b>T</b> | GTGGT <b>G</b> ACCA | AGTTTTTATTT | TATACC <b>G</b> TCT | TTTCT |
| AR39     | TTCACCTATGC         | GTGGTAAACCA         | AGTTTTTATTT | TATACCA TCT         | TTTCT |
| CWL029   | TTCACCTATGC         | GTGGTAAACCA         | AGTTTTTATTT | TATACCA TCT         | TTTCT |
| J138     | TTCACCTATGC         | GTGGTAAACCA         | AGTTTTTATTT | TATACCA TCT         | TTTCT |
| TW183    | TTCACCTATGC         | GTGGTAAACCA         | AGTTTTTATTT | TATACCA TCT         | TTTCT |
| TOR1     | TTCACCTATGC         | GTGGTAAACCA         | AGTTTTTATTT | TATACCA TCT         | TTTCT |
| WA97001  | TTCACCTATGC         | GTGGTAAACCA         | AGTTTTTATTT | TATACCA TCT         | TTTCT |
| 1979     | TTCACCTATGC         | GTGGTAA <b>T</b> CA | AGTTTTTATTT | TATACCA TCT         | TTTCT |
| SH511    | TTCACCTATGC         | GTGGTAA <b>T</b> CA | AGTTTTTATTT | TATACCA TCT         | TTTCT |

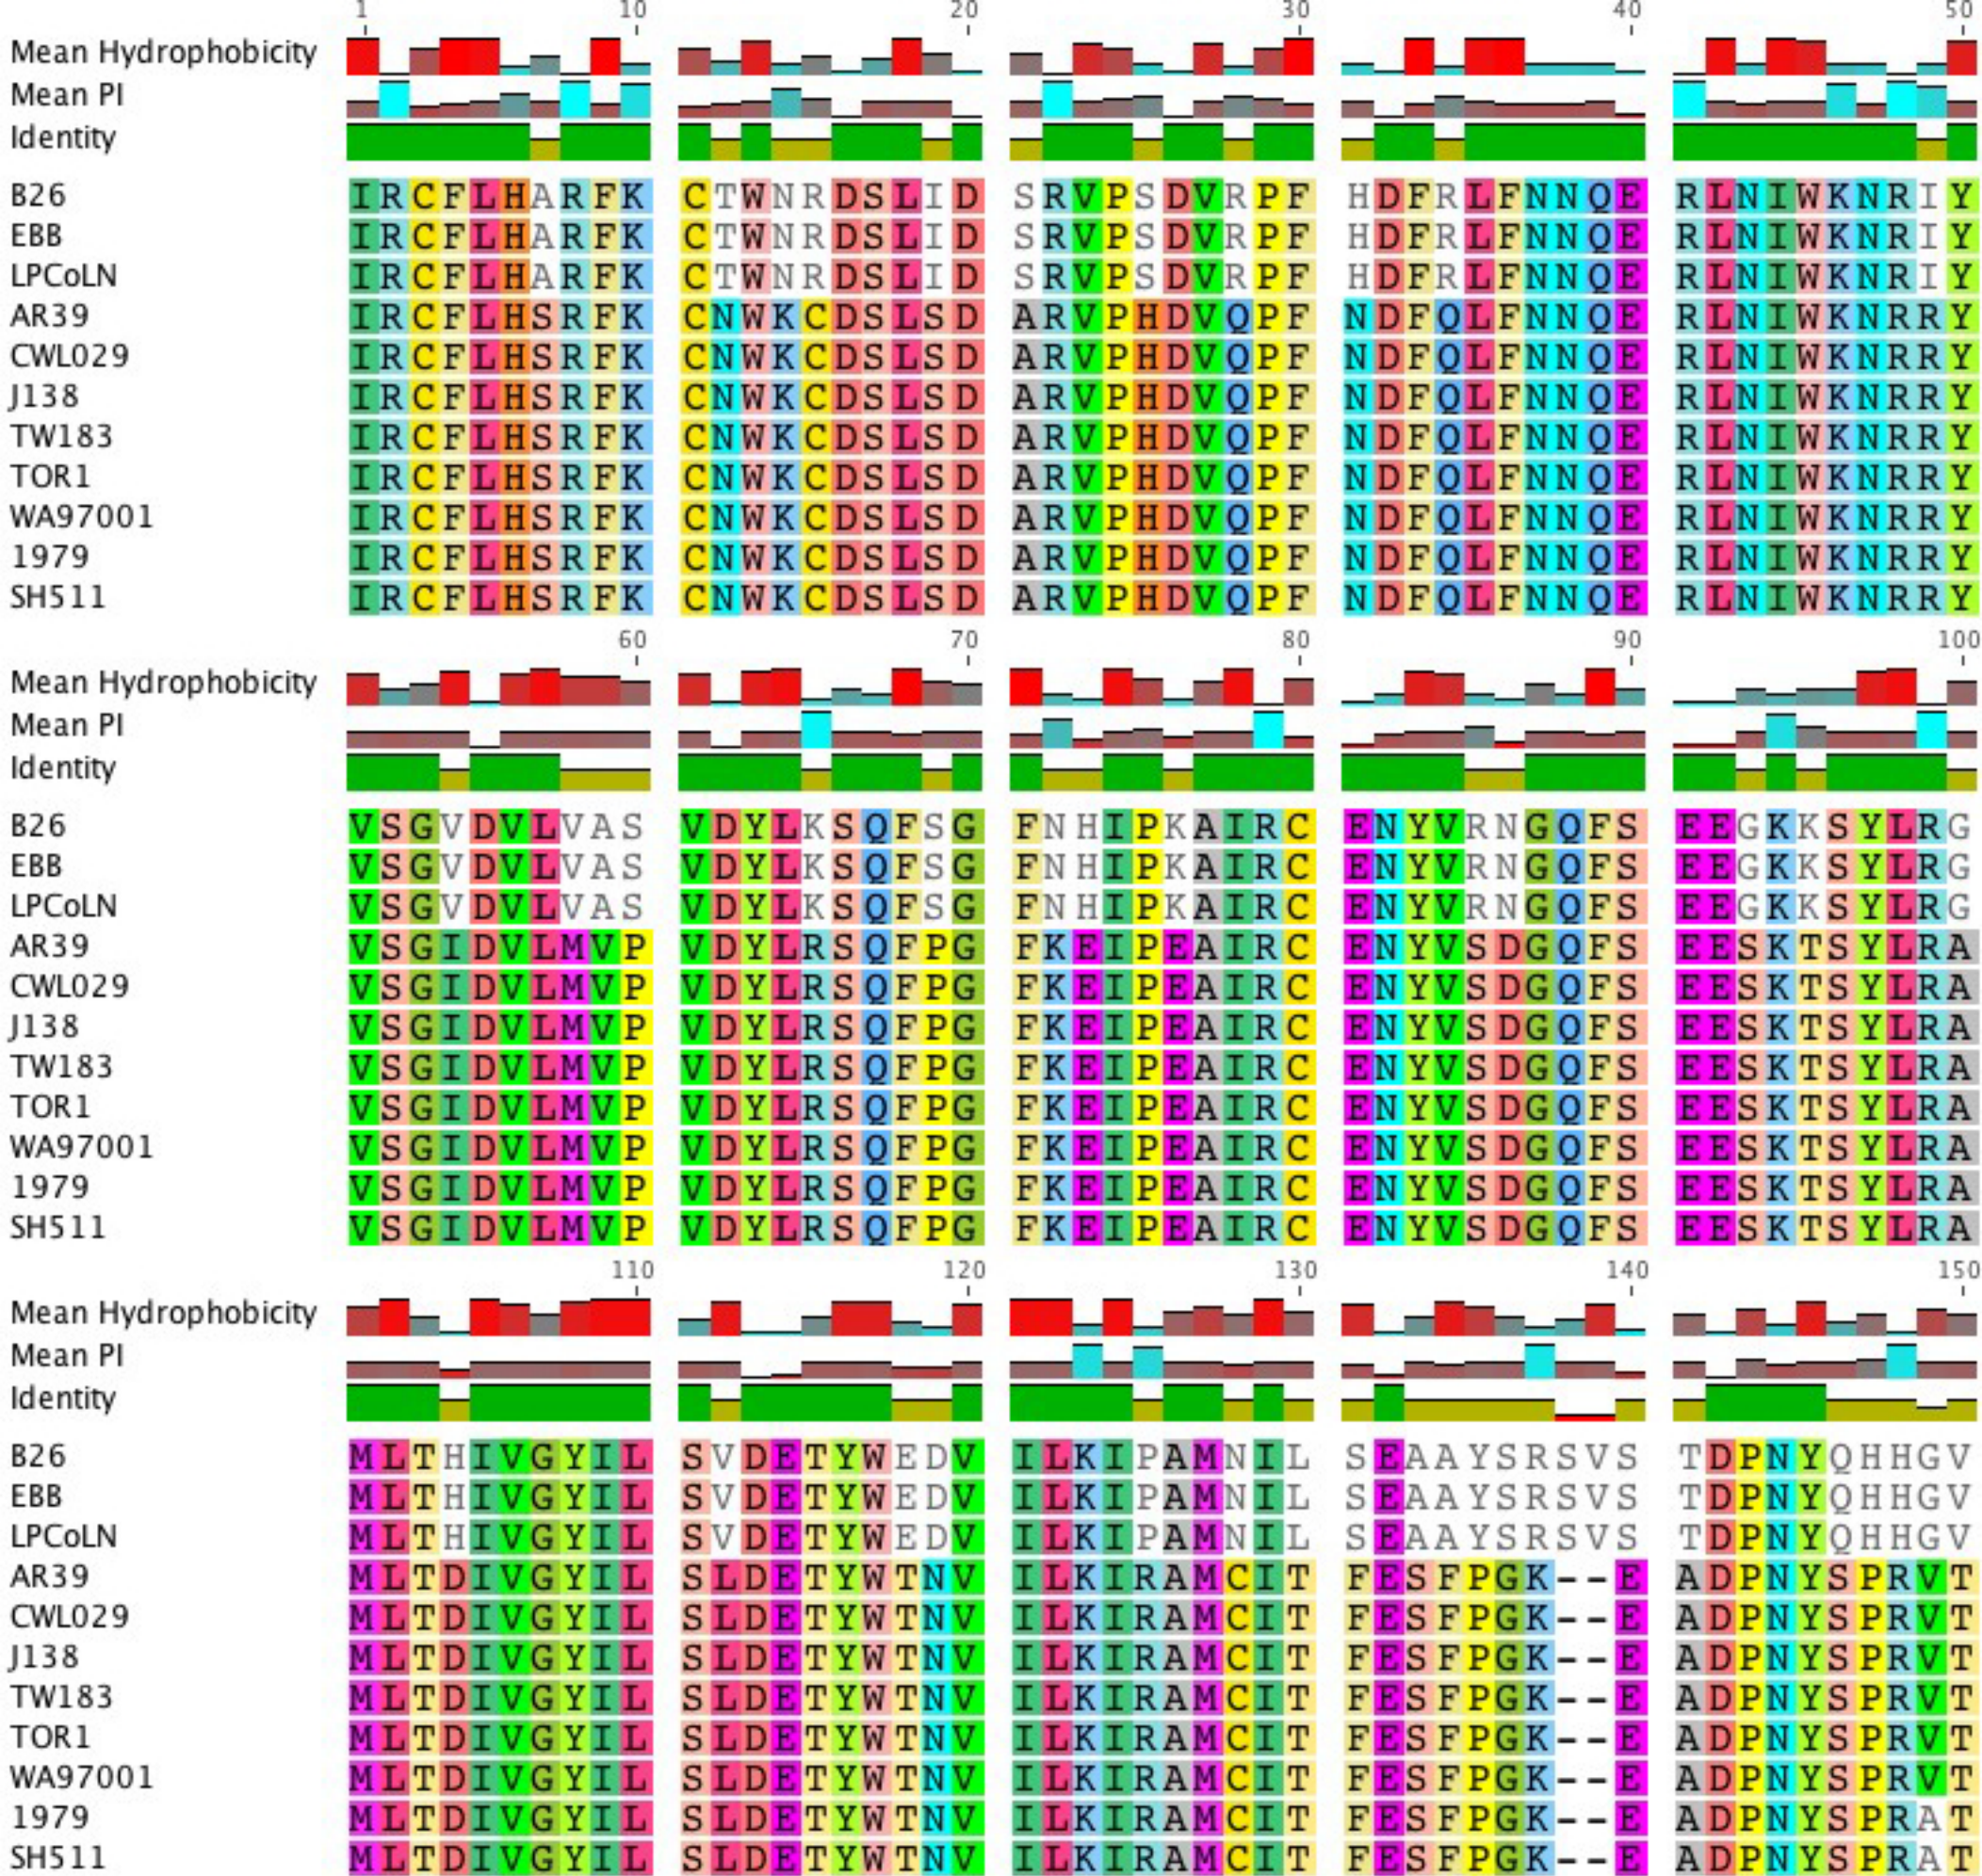

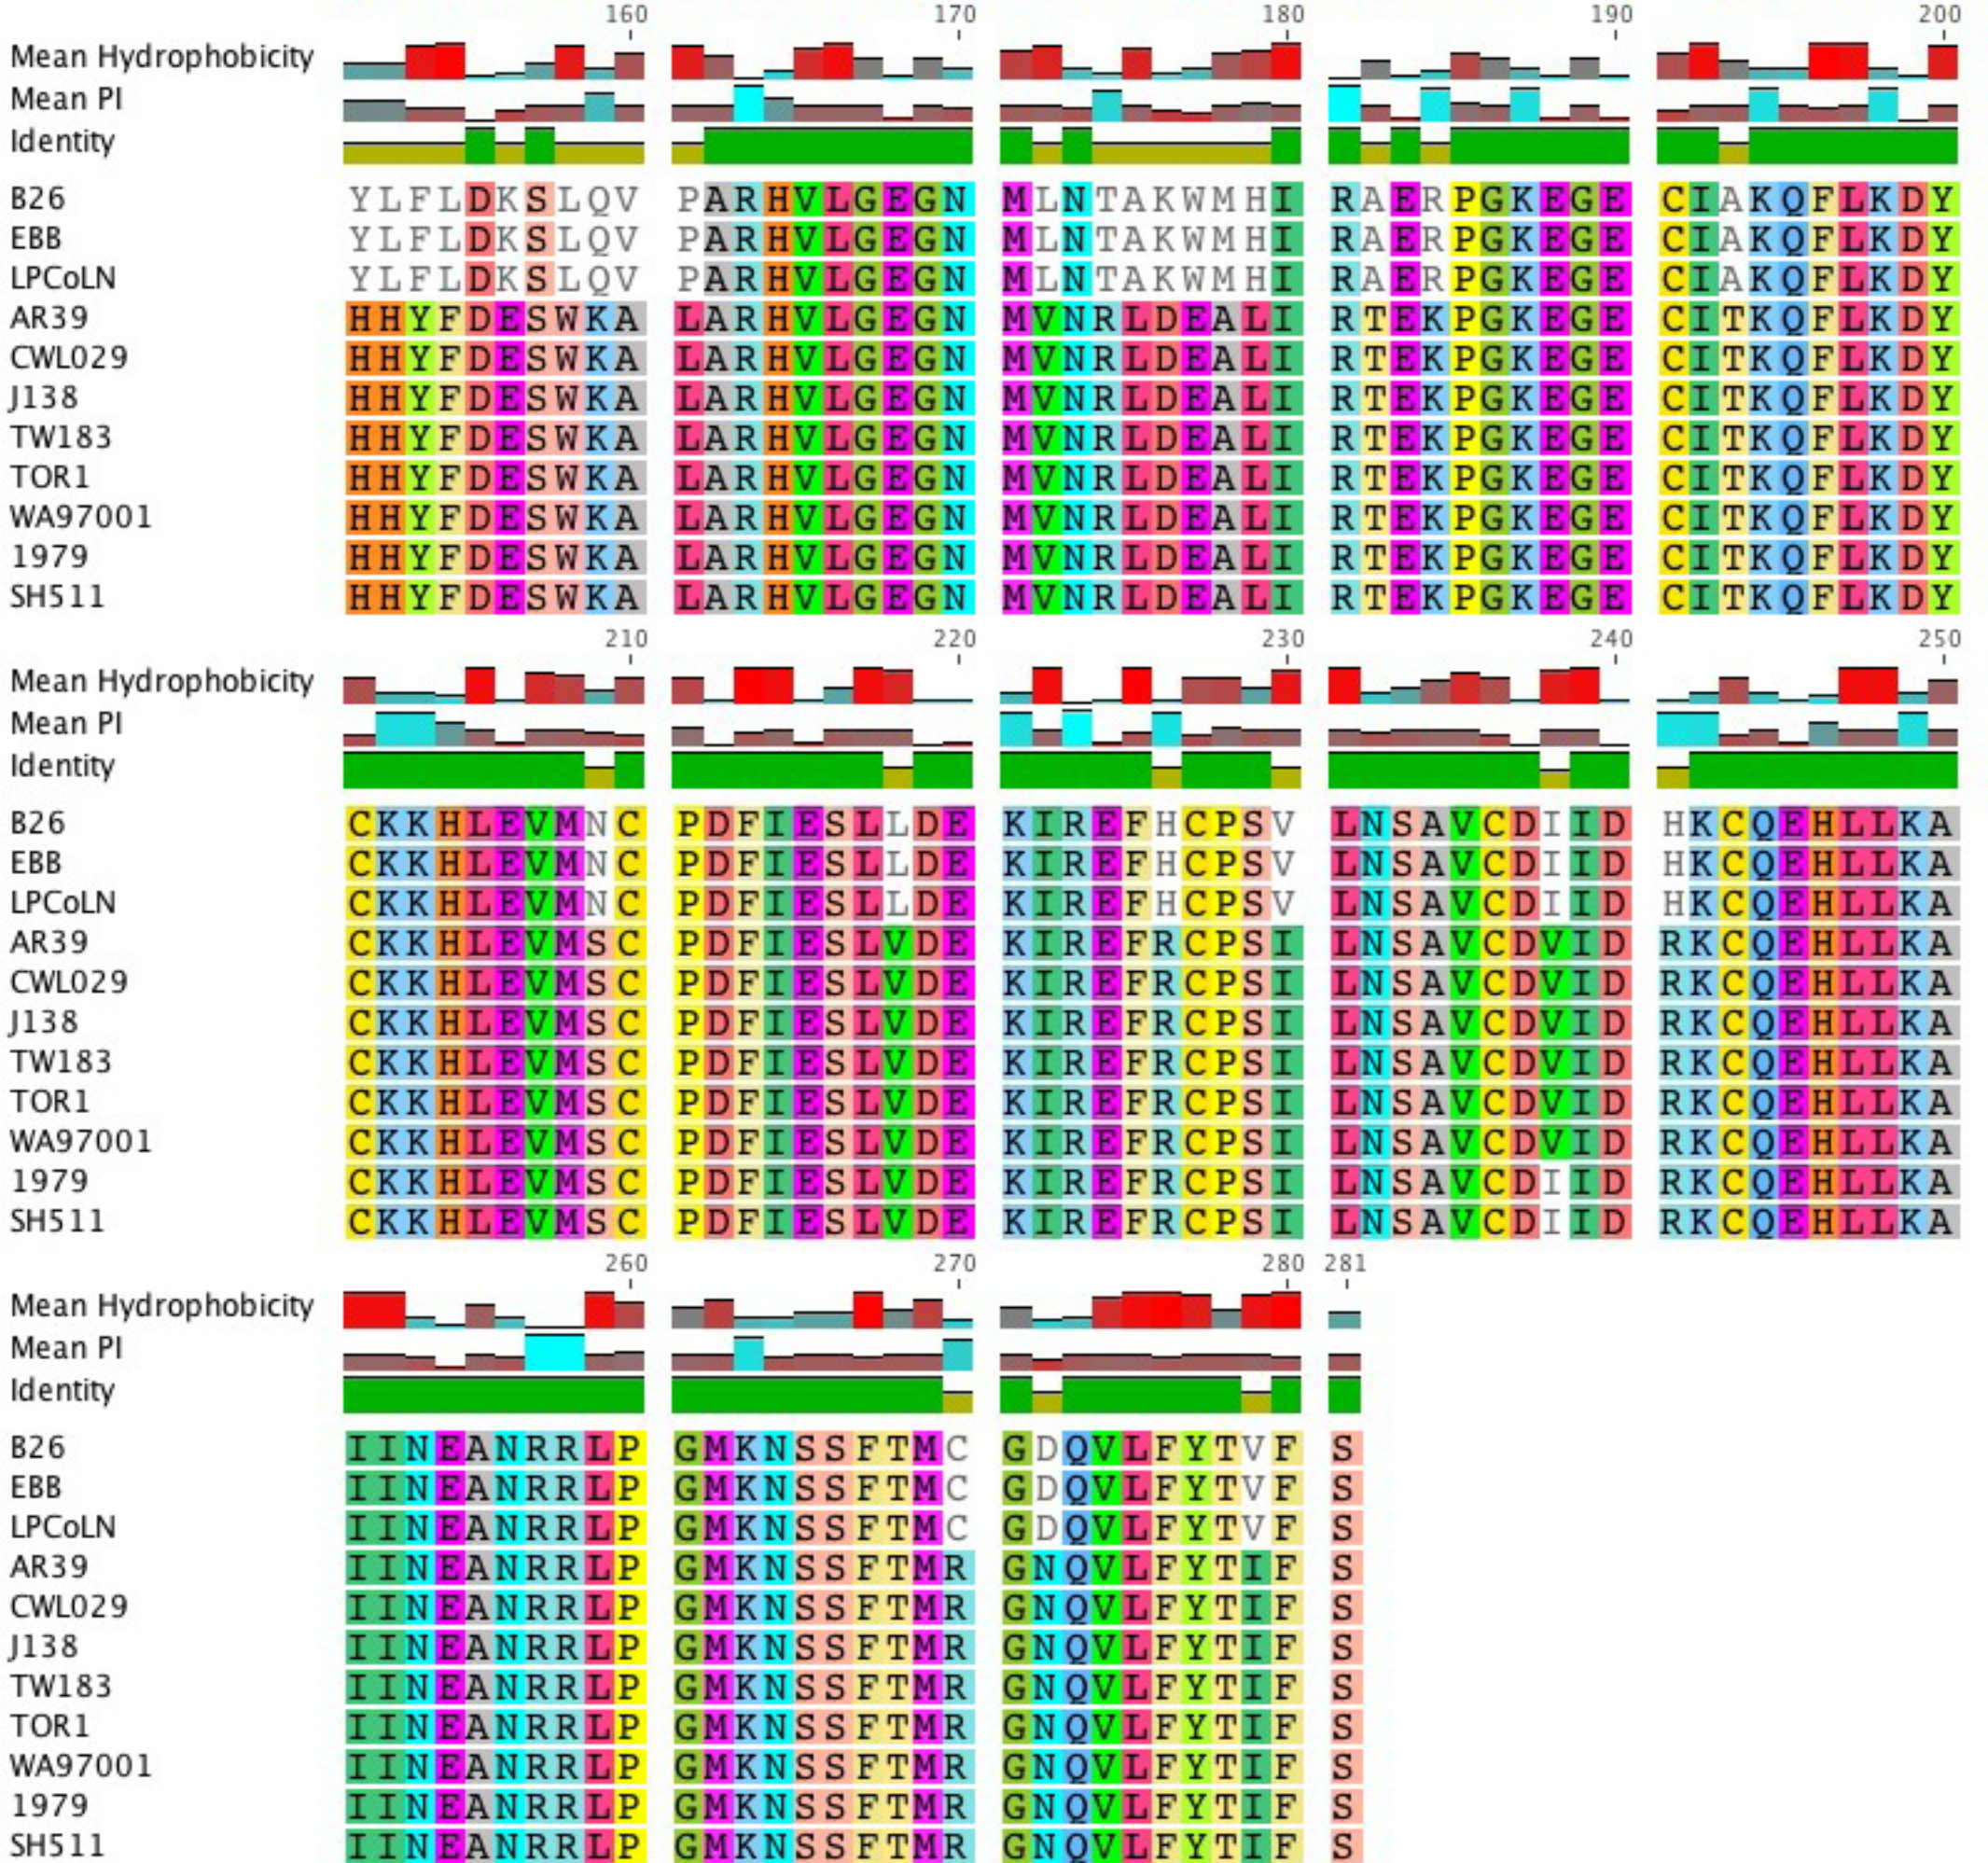

Supplement: ppat.1000903.s013.pdf [file ppat.1000903.s013.pdf]
