# Supplementary material for: Chlamydia pneumoniae Is Genetically Diverse in Animals and Appears to Have Crossed the Host Barrier to Humans on (At Least) Two Occasions
Source: PubMed Central journal article supplement (PMC2873915; doi:10.1371/journal.ppat.1000903), 2010-05-20

Identity 1 10 20 30 40 50

B26 TTTGACTGAA GATCAAAAAA AAACGGCACT TACTGTTGG A GGAAAAGTAA

B37 TTTGACTGAA GATCAAAAAA AAACGGCACT TACTGTTGG A GGAAAAGTAA

LPCoLN TTTGACTGAA GATCAAAAAA AAACGGCACT TACTGTTGG A GGAAAAGTAA

DE177 TTTGACTGAA GATCAAAAAA AA - CGGCATT TACTGTTGGG GGAAAAGTAA

N16 TTTGACTGAA GATCAAAAAA AAACGGCATT TACTGTT A G A GGAAAAGTAA

AR39 TTTGACTGAA GATCAAAAAA AAACG A CATT TACTGTTGGG GGAAAAGTAA

CWL029 TTTGACTGAA GATCAAAAAA AAACG A CATT TACTGTTGGG GGAAAAGTAA

J138 TTTGACTGAA GATCAAAAAA AAACG A CATT TACTGTTGGG GGAAAAGTAA

TW183 TTTGACTGAA GATCAAAAAA AAACG A CATT TACTGTTGGG GGAAAAGTAA

TOR1 TTTGACTGAA GATCAAAAAA AAACG A CATT TACTGTTGGG GGAAAAGTAA

WA97001 TTTGACTGAA GATCAAAAAA AAACG A CATT TACTGTTGGG GGAAAAGTAA

1979 TTTGACTGAA GATCAAAAAA AAACGGCATT TACTGTTGGG GGAAAAGTAA

SH511 TTTGACTGAA GATCAAAAAA AAACGGCATT TACTGTTGGG GGAAAAGTAA

Identity 60 70 80 90 100

B26 CTACAGAAA TACTGTAGTT G GAGGAGATC TCACCTGTAC AGACGG A GGA

B37 CTACAGAAA TACTGTAGTT G GAGGAGATC TCACCTGTAC AGACGG A GGA

LPCoLN CTACAGAAA TACTGTAGTT G GAGGAGATC TCACCTGTAC AGACGG A GGA

DE177 CTACAGAAA TACTGTAGTT AGAGGAGATC TCACCTGTAC AGACGG CGGA

N16 CTACAGAAA TACTGTAGTT G GAGGAGATC TCACCTGTAC AGACGG A GGA

AR39 CTACAGAAA TACTGTAGTT AGAGGAGATC TCACCTGTAC AGACGG CGGA

CWL029 CTACAGAAA TACTGTAGTT AGAGGAGATC TCACCTGTAC AGACGG CGGA

J138 CTACAGAAA TACTGTAGTT AGAGGAGATC TCACCTGTAC AGACGG CGGA

TW183 CTACAGAAA TACTGTAGTT AGAGGAGATC TCACCTGTAC AGACGG CGGA

TOR1 CTACAGAAA TACTGTAGTT AGAGGAGATC TCACCTGTAC AGACGG CGGA

WA97001 CTACAGAAA TACTGTAGTT AGAGGAGATC TCACCTGTAC AGACGG CGGA

1979 CTACAGAAA TACTGTAGTT AGAGGAGATC TCACCTGTAC AGACGG CGGA

SH511 CTACAGAAA TACTGTAGTT AGAGGAGATC TCACCTGTAC AGACGG CGGA

Identity 110 120 130 140 150

B26 CT C A C G T G T C A A T C G G A T C T T A C A A T A C A A A A A G A T A T A A A T A T C A G A C C

B37 CT C A C G T G T C A A T C G G A T C T T A C A A T A C A A A A A G A T A T A A A T A T C A G A C C

LPCoLN CT C A C G T G T C A A T C G G A T C T T A C A A T A C A A A A A G A T A T A A A T A T C A G A C C

DE177 CTGACTTGTC AATCGGATCT TACAA TACA A A A G A T A T A A A T A T C A G A C C

N16 CT C A C G T G T C A A T C G G A T C T T A C A A T A C A A A A A G A T A T A A A T A T C A G A C C

AR39 CTGACTTGTC AATCGGATCT TACAA TACA A A A G A T A T A A A T A T C A G A C C

CWL029 CTGACTTGTC AATCGGATCT TACAA TACA A A A G A T A T A A A T A T C A G A C C

J138 CTGACTTGTC AATCGGATCT TACAA TACA A A A G A T A T A A A T A T C A G A C C

TW183 CTGACTTGTC AATCGGATCT TACAA TACA A A A G A T A T A A A T A T C A G A C C

TOR1 CTGACTTGTC AATCGGATCT TACAA TACA A A A G A T A T A A A T A T C A G A C C

WA97001 CTGACTTGTC AATCGGATCT TACAA TACA A A A G A T A T A A A T A T C A G A C C

1979 CTGACTTGTC AATCGGATCT TACAA TACA A A A G A T A T A A A T A T C A G A C C

SH511 CTGACTTGTC AATCGGATCT TACAA TACA A A A G A T A T A A A T A T C A G A C C

| Identity | 160                | 170                         | 180                  | 190                 | 200                 |
|----------|--------------------|-----------------------------|----------------------|---------------------|---------------------|
| B26      | TACAAGCAC <b>T</b> | AATAGCATGG                  | TTTTTTGATGG          | TCGCTTAAAT          | TTATCTAA <b>C</b> T |
| B37      | TACAAGCAC <b>T</b> | AATAGCATGG                  | TTTTTTGATGG          | TCGCTTAAAT          | TTATCTAA <b>C</b> T |
| LPCoLN   | TACAAGCAC <b>T</b> | AATAGCATGG                  | TTTTTTGATGG          | TCGCTTAAAT          | TTATCTAA <b>C</b> T |
| DE177    | TACAAGCAC <b>C</b> | AATAGCATGG                  | TTTTTTGATGG          | TCGCTTAAAT          | TTATCTAA <b>T</b> T |
| N16      | TACAAGCAC <b>T</b> | AA <b>TGA</b> CA <b>TAG</b> | TTTTTTG <b>G</b> TGG | TCG <b>A</b> TTAAAT | TTATCTAA <b>C</b> T |
| AR39     | TACAAGCAC <b>C</b> | AATAGCATGG                  | TTTTTTGATGG          | TCGCTTAAAT          | TTATCTAA <b>T</b> T |
| CWL029   | TACAAGCAC <b>C</b> | AATAGCATGG                  | TTTTTTGATGG          | TCGCTTAAAT          | TTATCTAA <b>T</b> T |
| J138     | TACAAGCAC <b>C</b> | AATAGCATGG                  | TTTTTTGATGG          | TCGCTTAAAT          | TTATCTAA <b>T</b> T |
| TW183    | TACAAGCAC <b>C</b> | AATAGCATGG                  | TTTTTTGATGG          | TCGCTTAAAT          | TTATCTAA <b>T</b> T |
| TOR1     | TACAAGCAC <b>C</b> | AATAGCATGG                  | TTTTTTGATGG          | TCGCTTAAAT          | TTATCTAA <b>T</b> T |
| WA97001  | TACAAGCAC <b>C</b> | AATAGCATGG                  | TTTTTTGATGG          | TCGCTTAAAT          | TTATCTAA <b>T</b> T |
| 1979     | TACAAGCAC <b>C</b> | AATAGCATGG                  | TTTTTTGATGG          | TCGCTTAAAT          | TTATCTAA <b>T</b> T |
| SH511    | TACAAGCAC <b>C</b> | AATAGCATGG                  | TTTTTTGATGG          | TCGCTTAAAT          | TTATCTAA <b>T</b> T |

| Identity | 210        | 220                  | 230        | 240        | 250        |
|----------|------------|----------------------|------------|------------|------------|
| B26      | CACCTTTGTC | TTATAAG <b>G</b> AAT | TCTCAAGGAC | AAGACATTAC | CGACTATGAA |
| B37      | CACCTTTGTC | TTATAAG <b>G</b> AAT | TCTCAAGGAC | AAGACATTAC | CGACTATGAA |
| LPCoLN   | CACCTTTGTC | TTATAAG <b>G</b> AAT | TCTCAAGGAC | AAGACATTAC | CGACTATGAA |
| DE177    | CACCTTTGTC | TTATAAAAAAT          | TCTCAAGGAC | AAGACATTAC | CGACTATGAA |
| N16      | CACCTTTGTC | TTATAAAAAAT          | TCTCAAGGAC | AAGACATTAC | CGACTATGAA |
| AR39     | CACCTTTGTC | TTATAAAAAAT          | TCTCAAGGAC | AAGACATTAC | CGACTATGAA |
| CWL029   | CACCTTTGTC | TTATAAAAAAT          | TCTCAAGGAC | AAGACATTAC | CGACTATGAA |
| J138     | CACCTTTGTC | TTATAAAAAAT          | TCTCAAGGAC | AAGACATTAC | CGACTATGAA |
| TW183    | CACCTTTGTC | TTATAAAAAAT          | TCTCAAGGAC | AAGACATTAC | CGACTATGAA |
| TOR1     | CACCTTTGTC | TTATAAAAAAT          | TCTCAAGGAC | AAGACATTAC | CGACTATGAA |
| WA97001  | CACCTTTGTC | TTATAAAAAAT          | TCTCAAGGAC | AAGACATTAC | CGACTATGAA |
| 1979     | CACCTTTGTC | TTATAAAAAAT          | TCTCAAGGAC | AAGACATTAC | CGACTATGAA |
| SH511    | CACCTTTGTC | TTATAAAAAAT          | TCTCAAGGAC | AAGACATTAC | CGACTATGAA |

| Identity | 260                        | 270        | 280         | 290                  | 300                 |
|----------|----------------------------|------------|-------------|----------------------|---------------------|
| B26      | AAAA <b>T</b> AGCT         | CAGGGAAACC | TCAAGAAATAT | G TTCCTTTTCG         | GGTATTATAA          |
| B37      | AAAA <b>T</b> AGCT         | CAGGGAAACC | TCAAGAAATAT | G TTCCTTTTCG         | GGTATTATAA          |
| LPCoLN   | AAAA <b>T</b> AGCT         | CAGGGAAACC | TCAAGAAATAT | G TTCCTTTTCG         | GGTATTATAA          |
| DE177    | AAAA <b>T</b> GAGCT        | CAGGGAAACC | TCAAGAAATAT | G TTCCTTTTCG         | GGTATTATAA          |
| N16      | AAAA <b>T</b> GAG <b>T</b> | CAGGGAAACC | TCAAGAAATAT | G TTCCTTT <b>T</b> G | G <b>A</b> TATTATAA |
| AR39     | AAAA <b>T</b> GAGCT        | CAGGGAAACC | TCAAGAAATAT | G TTCCTTTTCG         | GGTATTATAA          |
| CWL029   | AAAA <b>T</b> GAGCT        | CAGGGAAACC | TCAAGAAATAT | G TTCCTTTTCG         | GGTATTATAA          |
| J138     | AAAA <b>T</b> GAGCT        | CAGGGAAACC | TCAAGAAATAT | G TTCCTTTTCG         | GGTATTATAA          |
| TW183    | AAAA <b>T</b> GAGCT        | CAGGGAAACC | TCAAGAAATAT | G TTCCTTTTCG         | GGTATTATAA          |
| TOR1     | AAAA <b>T</b> GAGCT        | CAGGGAAACC | TCAAGAAATAT | G TTCCTTTTCG         | GGTATTATAA          |
| WA97001  | AAAA <b>T</b> GAGCT        | CAGGGAAACC | TCAAGAAATAT | G TTCCTTTTCG         | GGTATTATAA          |
| 1979     | AAAA <b>T</b> GAGCT        | CAGGGAAACC | TCAAGAAATAT | G TTCCTTTTCG         | GGTATTATAA          |
| SH511    | AAAA <b>T</b> GAGCT        | CAGGGAAACC | TCAAGAAATAT | G TTCCTTTTCG         | GGTATTATAA          |





| Identity | 610                          | 620                 | 630                          | 640                  | 650                               |
|----------|------------------------------|---------------------|------------------------------|----------------------|-----------------------------------|
| B26      | AGGGA <b>A</b> GATA          | AA <b>A</b> GTCACAG | AG <b>C</b> TTGC <b>G</b> AT | GACGAG <b>G</b> CTCT | AGAGG <b>AA</b> <b>C</b> <b>A</b> |
| B37      | AGGGA <b>A</b> GATA          | AA <b>A</b> GTCACAG | AG <b>C</b> TTGC <b>G</b> AT | GACGAG <b>G</b> CTCT | AGAGG <b>AA</b> <b>C</b> <b>A</b> |
| LPCoLN   | AGGGA <b>A</b> GATA          | AA <b>A</b> GTCACAG | AG <b>C</b> TTGC <b>G</b> AT | GACGAG <b>G</b> CTCT | AGAGG <b>AA</b> <b>C</b> <b>A</b> |
| DE177    | AGGGAGGATA                   | AA TGTCACAG         | ATCTTGCAAT                   | GACGACCTCT           | AGAGGGTCCA                        |
| N16      | AG <b>T</b> GA <b>A</b> GATA | AA <b>A</b> GTCACAG | AG <b>C</b> TTGC <b>G</b> AT | GACGAG <b>G</b> CTCT | AGAGG <b>AA</b> <b>C</b> <b>A</b> |
| AR39     | AGGGAGGATA                   | AA TGTCACAG         | ATCTTGCAAT                   | GACGACCTCT           | AGAGGGTCCA                        |
| CWL029   | AGGGAGGATA                   | AA TGTCACAG         | ATCTTGCAAT                   | GACGACCTCT           | AGAGGGTCCA                        |
| J138     | AGGGAGGATA                   | AA TGTCACAG         | ATCTTGCAAT                   | GACGACCTCT           | AGAGGGTCCA                        |
| TW183    | AGGGAGGATA                   | AA TGTCACAG         | ATCTTGCAAT                   | GACGACCTCT           | AGAGGGTCCA                        |
| TOR1     | AGGGAGGATA                   | AA TGTCACAG         | ATCTTGCAAT                   | GACGACCTCT           | AGAGGGTCCA                        |
| WA97001  | AGGGAGGATA                   | AA TGTCACAG         | ATCTTGCAAT                   | GACGACCTCT           | AGAGGGTCCA                        |
| 1979     | AGGGAGGATA                   | AA TGTCACAG         | ATCTTGCAAT                   | GACGACCTCT           | AGAGGGTCCA                        |
| SH511    | AGGGAGGATA                   | AA TGTCACAG         | ATCTTGCAAT                   | GACGACCTCT           | AGAGGGTCCA                        |

| Identity | 660         | 670                          | 680        | 690                         | 700                         |
|----------|-------------|------------------------------|------------|-----------------------------|-----------------------------|
| B26      | GTTATTA TGA | AA CACG <b>A</b> CCT         | TTACAGGTAG | TTTGC GTTAC                 | ATACTATGCT                  |
| B37      | GTTATTA TGA | AA CACG <b>A</b> CCT         | TTACAGGTAG | TTTGC GTTAC                 | ATACTATGCT                  |
| LPCoLN   | GTTATTA TGA | AA CACG <b>A</b> CCT         | TTACAGGTAG | TTTGC GTTAC                 | ATACTATGCT                  |
| DE177    | GTTATTA TGA | AA CACG TCCT                 | TTACAGGTAG | TTTGC GTTAC                 | ATACTATGCT                  |
| N16      | GTTATTA TGA | A <b>G</b> CACG <b>A</b> CCT | TTACAGGTAG | TTTGC GTT <b>G</b> <b>T</b> | <b>G</b> TA <b>T</b> TATGCT |
| AR39     | GTTATTA TGA | AA CACG TCCT                 | TTACAGGTAG | TTTGC GTTAC                 | ATACTATGCT                  |
| CWL029   | GTTATTA TGA | AA CACG TCCT                 | TTACAGGTAG | TTTGC GTTAC                 | ATACTATGCT                  |
| J138     | GTTATTA TGA | AA CACG TCCT                 | TTACAGGTAG | TTTGC GTTAC                 | ATACTATGCT                  |
| TW183    | GTTATTA TGA | AA CACG TCCT                 | TTACAGGTAG | TTTGC GTTAC                 | ATACTATGCT                  |
| TOR1     | GTTATTA TGA | AA CACG TCCT                 | TTACAGGTAG | TTTGC GTTAC                 | ATACTATGCT                  |
| WA97001  | GTTATTA TGA | AA CACG TCCT                 | TTACAGGTAG | TTTGC GTTAC                 | ATACTATGCT                  |
| 1979     | GTTATTA TGA | AA CACG TCCT                 | TTACAGGTAG | TTTGC GTTAC                 | ATACTATGCT                  |
| SH511    | GTTATTA TGA | AA CACG TCCT                 | TTACAGGTAG | TTTGC GTTAC                 | ATACTATGCT                  |

| Identity | 710                  | 720        | 723 |
|----------|----------------------|------------|-----|
| B26      | <b>A</b> AAAA TAA TG | GTTACTTTAC | TTT |
| B37      | <b>A</b> AAAA TAA TG | GTTACTTTAC | TTT |
| LPCoLN   | <b>A</b> AAAA TAA TG | GTTACTTTAC | TTT |
| DE177    | CAAAA TAA TG         | GTTACTTTAC | TTT |
| N16      | <b>A</b> AAAA TAA TG | GTTACTTTAC | TTT |
| AR39     | CAAAA TAA TG         | GTTACTTTAC | TTT |
| CWL029   | CAAAA TAA TG         | GTTACTTTAC | TTT |
| J138     | CAAAA TAA TG         | GTTACTTTAC | TTT |
| TW183    | CAAAA TAA TG         | GTTACTTTAC | TTT |
| TOR1     | CAAAA TAA TG         | GTTACTTTAC | TTT |
| WA97001  | CAAAA TAA TG         | GTTACTTTAC | TTT |
| 1979     | CAAAA TAA TG         | GTTACTTTAC | TTT |
| SH511    | CAAAA TAA TG         | GTTACTTTAC | TTT |



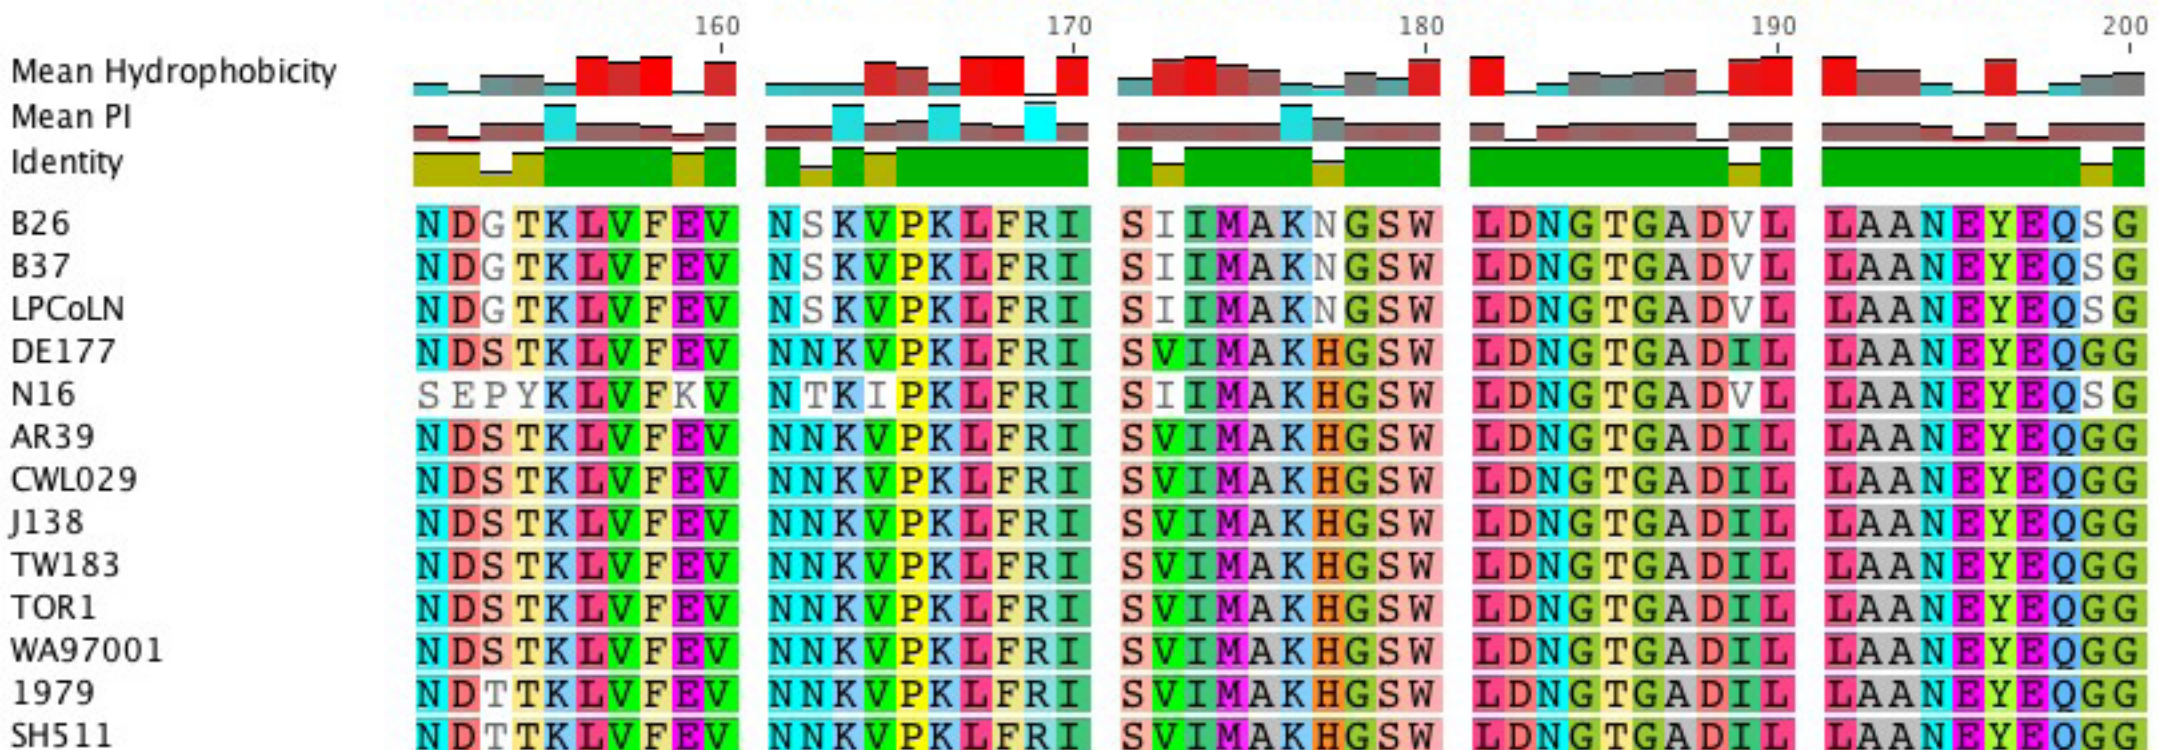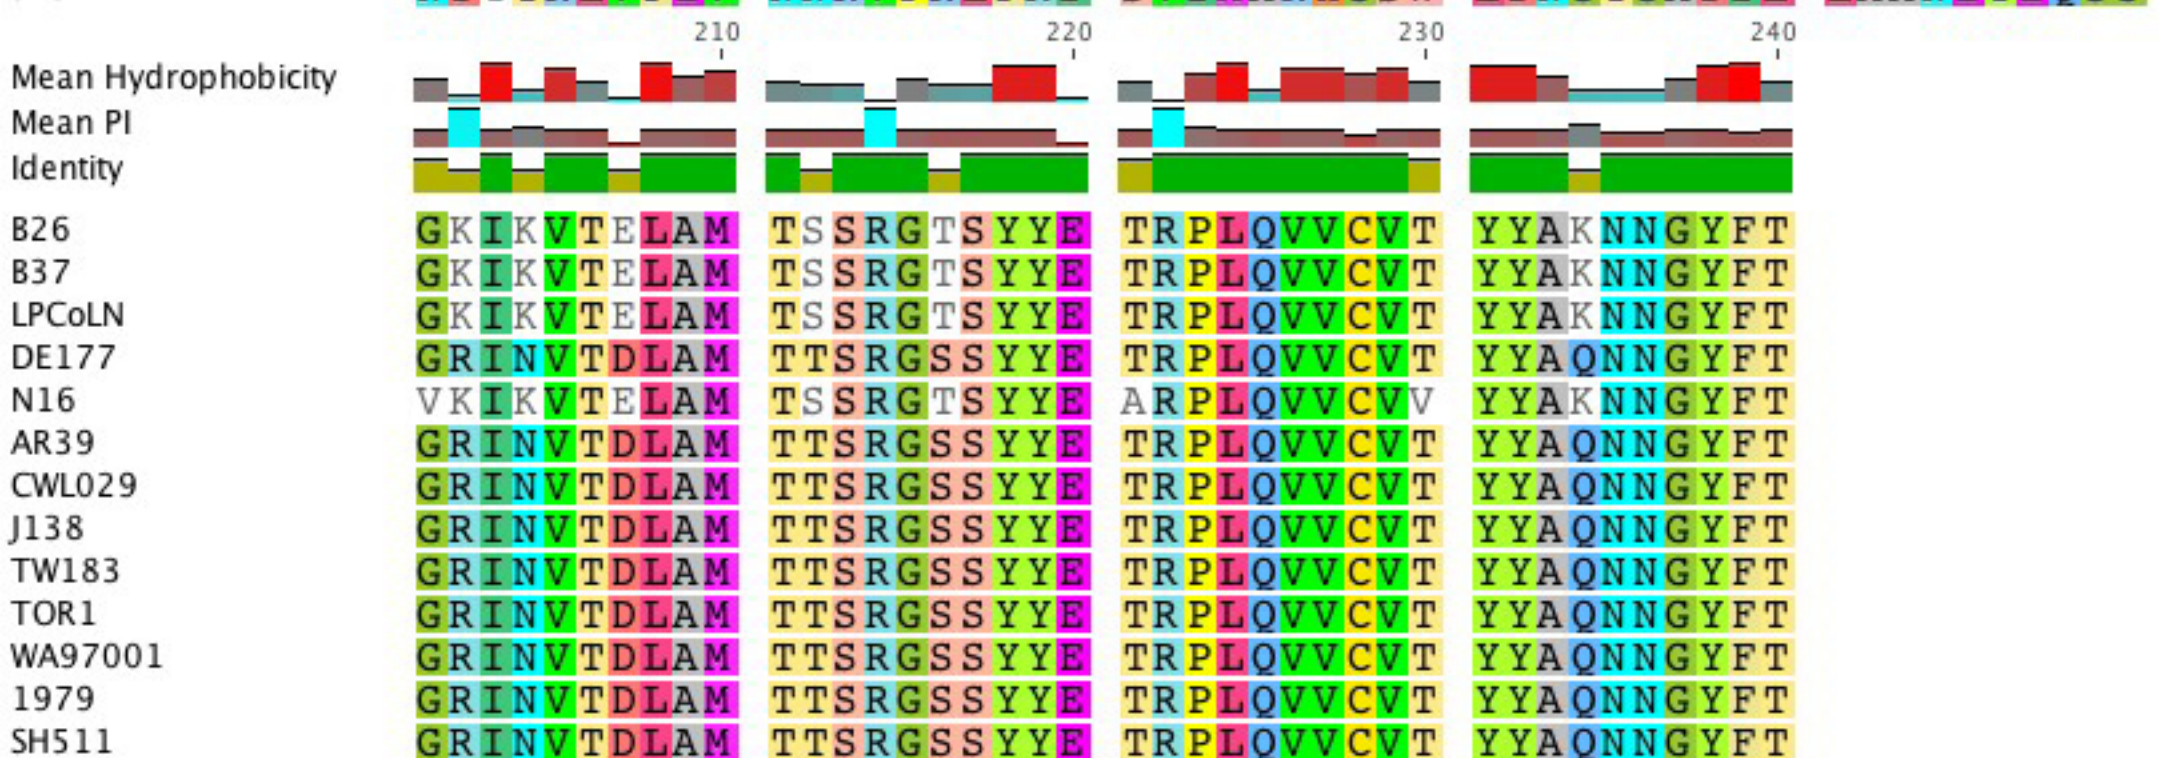

Supplement: ppat.1000903.s014.pdf [file ppat.1000903.s014.pdf]
