# Supplementary material for: Chlamydia pneumoniae Is Genetically Diverse in Animals and Appears to Have Crossed the Host Barrier to Humans on (At Least) Two Occasions
Source: PubMed Central journal article supplement (PMC2873915; doi:10.1371/journal.ppat.1000903), 2010-05-20

Identity 1 10 20 30 40 50

B26 TTGGGGTCTAT GGAGAGCACG ACAA CAAGGA AA ACTACAGC TG TAAAATGG  
 LPCoLN TTGGGGTCTAT GGAGAGCACG ACAA CAAGGA AA ACTACAGC TG TAAAATGG  
 DE177 TTGGGGTCTAT GGAGAGCACG ATAA CAAGGA AA ACTACAGC TG TAAAATGG  
 N16 TTGGGGTCTAT GGAGAGCACG ATAA CAAGGA AA ACTACAGC TG TAAAATGG  
 AR39 TTGGGGTCTAT GGAGAGCACG ATAA CAAGGA AA ACTACAGC TG TAAAATGG  
 CWL029 TTGGGGTCTAT GGAGAGCACG ATAA CAAGGA AA ACTACAGC TG TAAAATGG  
 J138 TTGGGGTCTAT GGAGAGCACG ATAA CAAGGA AA ACTACAGC TG TAAAATGG  
 TW183 TTGGGGTCTAT GGAGAGCACG ATAA CAAGGA AA ACTACAGC TG TAAAATGG  
 TOR1 TTGGGGTCTAT GGAGAGCACG ATAA CAAGGA AA ACTACAGC TG TAAAATGG  
 WA97001 TTGGGGTCTAT GGAGAGCACG ATAA CAAGGA AA ACTACAGC TG TAAAATGG  
 1979 TTGGGGTCTAT GGAGAGCACG ATAA CAAGGA AA ACTACAGC TG TAAAATGG  
 SH511 TTGGGGTCTAT GGAGAGCACG ATAA CAAGGA AA ACTACAGC TG TAAAATGG

Identity 60 70 80 90 100

B26 GTAAA CAATG TTCCTACGTA TCTGGGAACC TTAGGAGGAG ATGCTTCTAC  
 LPCoLN GTAAA CAATG TTCCTACGTA TCTGGGAACC TTAGGAGGAG ATGCTTCTAC  
 DE177 GTAAATAATG TTCCTACGTA TCTGGGAACC TTAGGAGGAG ATGCTTCTAC  
 N16 GTAAA CAATG TTCCTACGTA TCTGGGAACC TTAGGAGGAG ATGCTTCTAC  
 AR39 GTAAATAATG TTCCTACGTA TCTGGGAACC TTAGGAGGAG ATGCTTCTAC  
 CWL029 GTAAATAATG TTCCTACGTA TCTGGGAACC TTAGGAGGAG ATGCTTCTAC  
 J138 GTAAATAATG TTCCTACGTA TCTGGGAACC TTAGGAGGAG ATGCTTCTAC  
 TW183 GTAAATAATG TTCCTACGTA TCTGGGAACC TTAGGAGGAG ATGCTTCTAC  
 TOR1 GTAAATAATG TTCCTACGTA TCTGGGAACC TTAGGAGGAG ATGCTTCTAC  
 WA97001 GTAAATAATG TTCCTACGTA TCTGGGAACC TTAGGAGGAG ATGCTTCTAC  
 1979 GTAAATAATG TTCCTACGTA TCTGGGAACC TTAGGAGGAG ATGCTTCTAC  
 SH511 GTAAATAATG TTCCTACGTA TCTGGGAACC TTAGGAGGAG ATGCTTCTAC

Identity 110 120 130 140 150

B26 AGGTC TTTAT ATTTCTGGAG ACGGCACCGT GATTGTAGGT GCGGCAAATA  
 LPCoLN AGGTC TTTAT ATTTCTGGAG ACGGCACCGT GATTGTAGGT GCGGCAAATA  
 DE177 AGGTC TTTAT ATTTCTGGAG ACGGCACCGT GATTGTAGGT GCGGCAAATA  
 N16 AGGTC TTTAT ATTTCTGGAG ACGGCACCGT GATTGTAGGT GCGGCAAATA  
 AR39 AGGTC TTTAT ATTTCTGGAG ACGGCACCGT GATTGTAGGT GCGGCAAATA  
 CWL029 AGGTC TTTAT ATTTCTGGAG ACGGCACCGT GATTGTAGGT GCGGCAAATA  
 J138 AGGTC TTTAT ATTTCTGGAG ACGGCACCGT GATTGTAGGT GCGGCAAATA  
 TW183 AGGTC TTTAT ATTTCTGGAG ACGGCACCGT GATTGTAGGT GCGGCAAATA  
 TOR1 AGGTC TTTAT ATTTCTGGAG ACGGCACCGT GATTGTAGGT GCGGCAAATA  
 WA97001 AGGTC TTTAT ATTTCTGGAG ACGGCACCGT GATTGTAGGT GCGGCAAATA  
 1979 AGGTC TTTAT ATTTCTGGAG ACGGCACCGT GATTGTAGGT GCGGCAAATA  
 SH511 AGGTC TTTAT ATTTCTGGAG ACGGCACCGT GATTGTAGGT GCGGCAAATA

Identity 160 170 180 190 200

B26 CAGCAA CTGT AACCAATGGG AATCAGGAAT CCCACGCCTA TATGTATAAA  
 LPCoLN CAGCAA CTGT AACCAATGGG AATCAGGAAT CCCACGCCTA TATGTATAAA  
 DE177 CAGCAA CTGT AACCAATGGG AATCAGGAAT CCCACGCCTA TATGTATAAA  
 N16 CAGCAA CTGT AACCAATGGG AATCAGGAAT CCCACGCCTA TATGTATAAA  
 AR39 CAGCAA CTGT AACCAATGGG AATCAGGAAT CCCACGCCTA TATGTATAAA  
 CWL029 CAGCAA CTGT AACCAATGGG AATCAGGAAT CCCACGCCTA TATGTATAAA  
 J138 CAGCAA CTGT AACCAATGGG AATCAGGAAT CCCACGCCTA TATGTATAAA  
 TW183 CAGCAA CTGT AACCAATGGG AATCAGGAAT CCCACGCCTA TATGTATAAA  
 TOR1 CAGCAA CTGT AACCAATGGG AATCAGGAAT CCCACGCCTA TATGTATAAA  
 WA97001 CAGCAA CTGT AACCAATGGG AATCAGGAAT CCCACGCCTA TATGTATAAA  
 1979 CAGCAA CTGT AACCAATGGG AATCAGGAAT CCCACGCCTA TATGTATAAA  
 SH511 CAGCAA CTGT AACCAATGGG AATCAGGAAT CCCACGCCTA TATGTATAAA

|          |                                                                                 |                                                                                 |                                                                                  |                                                                                   |                                                                                   |
|----------|---------------------------------------------------------------------------------|---------------------------------------------------------------------------------|----------------------------------------------------------------------------------|-----------------------------------------------------------------------------------|-----------------------------------------------------------------------------------|
|          | 210                                                                             | 220                                                                             | 230                                                                              | 240                                                                               | 250                                                                               |
| Identity |  |  |  |  |  |
| B26      | GATAACCAAA                                                                      | TGAAAGATT                                                                       | AGGAACTTTA                                                                       | GGAGGGGCGA                                                                        | ATTCTTCAGC                                                                        |
| LPCoLN   | GATAACCAAA                                                                      | TGAAAGATT                                                                       | AGGAACTTTA                                                                       | GGAGGGGCGA                                                                        | ATTCTTCAGC                                                                        |
| DE177    | GATAACCAAA                                                                      | TGAAAGATT                                                                       | AGGAACTTTA                                                                       | GGAGGGGCGA                                                                        | ATTCTTCAGC                                                                        |
| N16      | GATAACCAAA                                                                      | TGAAAGATT                                                                       | AGGAACTTTA                                                                       | GGAGGGGCGA                                                                        | ATTCTTCAGC                                                                        |
| AR39     | GATAACCAAA                                                                      | TGAAAGATTG                                                                      | A-----                                                                           | -----                                                                             | -----                                                                             |
| CWL029   | GATAACCAAA                                                                      | TGAAAGATTG                                                                      | A-----                                                                           | -----                                                                             | -----                                                                             |
| J138     | GATAACCAAA                                                                      | TGAAAGATTG                                                                      | A-----                                                                           | -----                                                                             | -----                                                                             |
| TW183    | GATAACCAAA                                                                      | TGAAAGATTG                                                                      | A-----                                                                           | -----                                                                             | -----                                                                             |
| TOR1     | GATAACCAAA                                                                      | TGAAAGATTG                                                                      | AGGAACTTTA                                                                       | GGAGGGGCGA                                                                        | ATTCTTCAGC                                                                        |
| WA97001  | GATAACCAAA                                                                      | TGAAAGATTG                                                                      | AGGAACTTTA                                                                       | GGAGGGGCGA                                                                        | ATTCTTCAGC                                                                        |
| 1979     | GATAACCAAA                                                                      | TGAAAGATTG                                                                      | AGGAACTTTA                                                                       | GGAGGGGCGA                                                                        | ATTCTTCAGC                                                                        |
| SH511    | GATAACCAAA                                                                      | TGAAAGATTG                                                                      | AGGAACTTTA                                                                       | GGAGGGGCGA                                                                        | ATTCTTCAGC                                                                        |

|          |                                                                                   |                                                                                   |                                                                                    |                                                                                     |                                                                                     |
|----------|-----------------------------------------------------------------------------------|-----------------------------------------------------------------------------------|------------------------------------------------------------------------------------|-------------------------------------------------------------------------------------|-------------------------------------------------------------------------------------|
|          | 260                                                                               | 270                                                                               | 280                                                                                | 290                                                                                 | 300                                                                                 |
| Identity |  |  |  |  |  |
| B26      | AACTGGAGTT                                                                        | TCTTCAGACG                                                                        | GTTCTGTGAT                                                                         | TGTTGGTCAG                                                                          | GCGCAGACAG                                                                          |
| LPCoLN   | AACTGGAGTT                                                                        | TCTTCAGACG                                                                        | GTTCTGTGAT                                                                         | TGTTGGTCAG                                                                          | GCGCAGACAG                                                                          |
| DE177    | AACTGGAGTT                                                                        | TCTTCAGACG                                                                        | GTTCTGTGAT                                                                         | TGTTGGTCAG                                                                          | GCGCAGACAG                                                                          |
| N16      | AACTGGAGTT                                                                        | TCTTCAGACG                                                                        | GTTCTGTGAT                                                                         | TGTTGGTCAG                                                                          | GCGCAGACAG                                                                          |
| AR39     | -----                                                                             | -----                                                                             | -----                                                                              | -----                                                                               | -----                                                                               |
| CWL029   | -----                                                                             | -----                                                                             | -----                                                                              | -----                                                                               | -----                                                                               |
| J138     | -----                                                                             | -----                                                                             | -----                                                                              | -----                                                                               | -----                                                                               |
| TW183    | -----                                                                             | -----                                                                             | -----                                                                              | -----                                                                               | -----                                                                               |
| TOR1     | AACTGGAGTT                                                                        | TCTTCAGACG                                                                        | GTTCTGTGAT                                                                         | TGTTGGTCAG                                                                          | GCGCAGACAG                                                                          |
| WA97001  | AACTGGAGTT                                                                        | TCTTCAGACG                                                                        | GTTCTGTGAT                                                                         | TGTTGGTCAG                                                                          | GCGCAGACAG                                                                          |
| 1979     | AACTGGAGTT                                                                        | TCTTCAGACG                                                                        | GTTCTGTGAT                                                                         | TGTTGGTCAG                                                                          | GCGCAGACAG                                                                          |
| SH511    | AACTGGAGTT                                                                        | TCTTCAGACG                                                                        | GTTCTGTGAT                                                                         | TGTTGGTCAG                                                                          | GCGCAGACAG                                                                          |

|          |                                                                                     |                                                                                     |                                                                                      |                                                                                       |                                                                                       |
|----------|-------------------------------------------------------------------------------------|-------------------------------------------------------------------------------------|--------------------------------------------------------------------------------------|---------------------------------------------------------------------------------------|---------------------------------------------------------------------------------------|
|          | 310                                                                                 | 320                                                                                 | 330                                                                                  | 340                                                                                   | 350                                                                                   |
| Identity |  |  |  |  |  |
| B26      | CCGATAAATC                                                                          | CGTGCATGCT                                                                          | TTTCAATACT                                                                           | ATAATGGTGA                                                                            | GATGAAAGAT                                                                            |
| LPCoLN   | CCGATAAATC                                                                          | CGTGCATGCT                                                                          | TTTCAATACT                                                                           | ATAATGGTGA                                                                            | GATGAAAGAT                                                                            |
| DE177    | CCGATAAATC                                                                          | CGTGCATGCT                                                                          | TTTCAATACT                                                                           | ATAATGGTGA                                                                            | GATGAAAGAT                                                                            |
| N16      | CCGATAAATC                                                                          | CGTGCATGCT                                                                          | TTTCAATACT                                                                           | ATAATGGTGA                                                                            | GATGAAAGAT                                                                            |
| AR39     | -----                                                                               | -----                                                                               | -----                                                                                | -----                                                                                 | -ATGAAAGAT                                                                            |
| CWL029   | -----                                                                               | -----                                                                               | -----                                                                                | -----                                                                                 | -ATGAAAGAT                                                                            |
| J138     | -----                                                                               | -----                                                                               | -----                                                                                | -----                                                                                 | -ATGAAAGAT                                                                            |
| TW183    | -----                                                                               | -----                                                                               | -----                                                                                | -----                                                                                 | -ATGAAAGAT                                                                            |
| TOR1     | CCGATAAATC                                                                          | CGTGCATGCT                                                                          | TTTCAATACT                                                                           | ATAATGGTGA                                                                            | GATGAAAGAT                                                                            |
| WA97001  | CCGATAAATC                                                                          | CGTGCATGCT                                                                          | TTTCAATACT                                                                           | ATAATGGTGA                                                                            | GATGAAAGAT                                                                            |
| 1979     | CCGATAAATC                                                                          | CGTGCATGCT                                                                          | TTTCAATACT                                                                           | ATAATGGTGA                                                                            | GATGAAAGAT                                                                            |
| SH511    | CCGATAAATC                                                                          | CGTGCATGCT                                                                          | TTTCAATACT                                                                           | ATAATGGTGA                                                                            | GATGAAAGAT                                                                            |

|          |                                                                                     |                                                                                     |                                                                                      |                                                                                       |                                                                                       |
|----------|-------------------------------------------------------------------------------------|-------------------------------------------------------------------------------------|--------------------------------------------------------------------------------------|---------------------------------------------------------------------------------------|---------------------------------------------------------------------------------------|
|          | 360                                                                                 | 370                                                                                 | 380                                                                                  | 390                                                                                   | 400                                                                                   |
| Identity |  |  |  |  |  |
| B26      | TTGGGGACTC                                                                          | TTGGGGGTAC                                                                          | GCTCTTCTACA                                                                          | GCAAAAACAG                                                                            | TGTCCCAGAG                                                                            |
| LPCoLN   | TTGGGGACTC                                                                          | TTGGGGGTAC                                                                          | GCTCTTCTACA                                                                          | GCAAAAACAG                                                                            | TGTCCCAGAG                                                                            |
| DE177    | TTGGGGACTC                                                                          | TTGGGGGTAC                                                                          | CTCTTCTACA                                                                           | GCAAAAACAG                                                                            | TGTCCCAGAG                                                                            |
| N16      | TTGGGGACTC                                                                          | TTGGGGGTAC                                                                          | GCTCTTCTACA                                                                          | GCAAAAACAG                                                                            | TGTCCCAGAG                                                                            |
| AR39     | TTGGGGACTC                                                                          | TTGGGGGTAC                                                                          | CTCTTCTACA                                                                           | GCAAAAACAG                                                                            | TGTCCCAGAG                                                                            |
| CWL029   | TTGGGGACTC                                                                          | TTGGGGGTAC                                                                          | CTCTTCTACA                                                                           | GCAAAAACAG                                                                            | TGTCCCAGAG                                                                            |
| J138     | TTGGGGACTC                                                                          | TTGGGGGTAC                                                                          | CTCTTCTACA                                                                           | GCAAAAACAG                                                                            | TGTCCCAGAG                                                                            |
| TW183    | TTGGGGACTC                                                                          | TTGGGGGTAC                                                                          | CTCTTCTACA                                                                           | GCAAAAACAG                                                                            | TGTCCCAGAG                                                                            |
| TOR1     | TTGGGGACTC                                                                          | TTGGGGGTAC                                                                          | CTCTTCTACA                                                                           | GCAAAAACAG                                                                            | TGTCCCAGAG                                                                            |
| WA97001  | TTGGGGACTC                                                                          | TTGGGGGTAC                                                                          | CTCTTCTACA                                                                           | GCAAAAACAG                                                                            | TGTCCCAGAG                                                                            |
| 1979     | TTGGGGACTC                                                                          | TTGGGGGTAC                                                                          | CTCTTCTACA                                                                           | GCAAAAACAG                                                                            | TGTCCCAGAG                                                                            |
| SH511    | TTGGGGACTC                                                                          | TTGGGGGTAC                                                                          | CTCTTCTACA                                                                           | GCAAAAACAG                                                                            | TGTCCCAGAG                                                                            |

410 420 430 440 450

Identity

B26 TGGTAAAGTG ATCATGGGTA GATCACAAAT TGCTGATGGC AGTTGGCACG  
 LPCoLN TGGTAAAGTG ATCATGGGTA GATCACAAAT TGCTGATGGC AGTTGGCACG  
 DE177 TGGTAAAGTG ATCATGGGTA GATCACAAAT TGCTGATGGC AGTTGGCACG  
 N16 TGGTAAAGTG ATC**G**TGGGTA GATCACAAAT T**T**CTGATGGC AGTTGGCACG  
 AR39 TGGTAAAGTG ATCATGGGTA GATCACAAAT TGCTGATGGC AGTTGGCACG  
 CWL029 TGGTAAAGTG ATCATGGGTA GATCACAAAT TGCTGATGGC AGTTGGCACG  
 J138 TGGTAAAGTG ATCATGGGTA GATCACAAAT TGCTGATGGC AGTTGGCACG  
 TW183 TGGTAAAGTG ATCATGGGTA GATCACAAAT TGCTGATGGC AGTTGGCACG  
 TOR1 TGGTAAAGTG ATCATGGGTA GATCACAAAT TGCTGATGGC AGTTGGCACG  
 WA97001 TGGTAAAGTG ATCATGGGTA GATCACAAAT TGCTGATGGC AGTTGGCACG  
 1979 TGGTAAAGTG ATCATGGGTA GATCACAAAT TGCTGATGGC AGTTGGCACG  
 SH511 TGGTAAAGTG ATCATGGGTA GATCACAAAT TGCTGATGGC AGTTGGCACG

460 470 480 490 500

Identity

B26 CATTTATGTG TCATACGGAT TTCTCCTCTA ATAATGTACT CTTTGATCTC  
 LPCoLN CATTTATGTG TCATACGGAT TTCTCCTCTA ATAATGTACT CTTTGATCTC  
 DE177 CATTTATGTG TCATACGGAT TTCTCCTCTA ATAATGTACT CTTTGATCTC  
 N16 CATTTATGTG **C**CATACGGAT TTCTC**T**CTA ATAATGTACT CTTTGATCTC  
 AR39 CATTTATGTG TCATACGGAT TTCTCCTCTA ATAATGTACT CTTTGATCTC  
 CWL029 CATTTATGTG TCATACGGAT TTCTCCTCTA ATAATGTACT CTTTGATCTC  
 J138 CATTTATGTG TCATACGGAT TTCTCCTCTA ATAATGTACT CTTTGATCTC  
 TW183 CATTTATGTG TCATACGGAT TTCTCCTCTA ATAATGTACT CTTTGATCTC  
 TOR1 CATTTATGTG TCATACGGAT TTCTCCTCTA ATAATGTACT CTTTGATCTC  
 WA97001 CATTTATGTG TCATACGGAT TTCTCCTCTA ATAATGTACT CTTTGATCTC  
 1979 CATTTATGTG TCATACGGAT TTCTCCTCTA ATAATGTACT CTTTGATCTC  
 SH511 CATTTATGTG TCATACGGAT TTCTCCTCTA ATAATGTACT CTTTGATCTC

510 520 530 540 550

Identity

B26 GATAATACGT ATAAAACCTCT AAGAGAAAAT GGCCGTCAGC TAAATTCCAT  
 LPCoLN GATAATACGT ATAAAACCTCT AAGAGAAAAT GGCCGTCAGC TAAATTCCAT  
 DE177 GATAATACGT ATAAAACCTCT AAGAGAAAAT GGCCGTCAGC TAAATTCCAT  
 N16 GATAATACGT ATAAAACCTCT AAGAGAAAAT GG**C****T**GTCAGC TAAATTCCAT  
 AR39 GATAATACGT ATAAAACCTCT AAGAGAAAAT GGCCGTCAGC TAAATTCCAT  
 CWL029 GATAATACGT ATAAAACCTCT AAGAGAAAAT GGCCGTCAGC TAAATTCCAT  
 J138 GATAATACGT ATAAAACCTCT AAGAGAAAAT GGCCGTCAGC TAAATTCCAT  
 TW183 GATAATACGT ATAAAACCTCT AAGAGAAAAT GGCCGTCAGC TAAATTCCAT  
 TOR1 GATAATACGT ATAAAACCTCT AAGAGAAAAT GGCCGTCAGC TAAATTCCAT  
 WA97001 GATAATACGT ATAAAACCTCT AAGAGAAAAT GGCCGTCAGC TAAATTCCAT  
 1979 GATAATACGT ATAAAACCTCT AAGAGAAAAT GGCCGTCAGC TAAATTCCAT  
 SH511 GATAATACGT ATAAAACCTCT AAGAGAAAAT GGCCGTCAGC TAAATTCCAT

560 570 580 590 600

Identity

B26 ATTCAACCTA CAAAATATGA TGTTACAGAG AGCCTCAGAT CATGAGTTCA  
 LPCoLN ATTCAACCTA CAAAATATGA TGTTACAGAG AGCCTCAGAT CATGAGTTCA  
 DE177 ATTCAACCTA CAAAATATGA TGTTACAGAG AGCCTCAGAT CATGAGTTCA  
 N16 ATTCAAC**C**TA CAAAATATGA TGTTACAGAG AGCCTCAG  
 AR39 ATTCAACCTA CAAAATATGA TGTTACAGAG AGCCTCAGAT CATGAGTTCA  
 CWL029 ATTCAACCTA CAAAATATGA TGTTACAGAG AGCCTCAGAT CATGAGTTCA  
 J138 ATTCAACCTA CAAAATATGA TGTTACAGAG AGCCTCAGAT CATGAGTTCA  
 TW183 ATTCAACCTA CAAAATATGA TGTTACAGAG AGCCTCAGAT CATGAGTTCA  
 TOR1 ATTCAACCTA CAAAATATGA TGTTACAGAG AGCCTCAGAT CATGAGTTCA  
 WA97001 ATTCAACCTA CAAAATATGA TGTTACAGAG AGCCTCAGAT CATGAGTTCA  
 1979 ATTCAACCTA CAAAATATGA TGTTACAGAG AGCCTCAGAT CATGAGTTCA  
 SH511 ATTCAACCTA CAAAATATGA TGTTACAGAG AGCCTCAGAT CATGAGTTCA

|          |                                                                                 |                                                                                 |                                                                                  |                                                                                   |                                                                                   |
|----------|---------------------------------------------------------------------------------|---------------------------------------------------------------------------------|----------------------------------------------------------------------------------|-----------------------------------------------------------------------------------|-----------------------------------------------------------------------------------|
|          | 610                                                                             | 620                                                                             | 630                                                                              | 640                                                                               | 650                                                                               |
| Identity |  |  |  |  |  |
| B26      | CAGAGTTTGG                                                                      | AAGGAGTAAC                                                                      | ATCGTCTTTG                                                                       | GTGCCGGGCT                                                                        | TTATGTGAAT                                                                        |
| LPCoLN   | CAGAGTTTGG                                                                      | AAGGAGTAAC                                                                      | ATCGTCTTTG                                                                       | GTGCCGGGCT                                                                        | TTATGTGAAT                                                                        |
| DE177    | CAGAGTTTGG                                                                      | AAGGAGTAAC                                                                      | ATCGCTCTTG                                                                       | GTGCCGGGCT                                                                        | TTATGTGAAT                                                                        |
| N16      |                                                                                 |                                                                                 |                                                                                  |                                                                                   |                                                                                   |
| AR39     | CAGAGTTTGG                                                                      | AAGGAGTAAC                                                                      | ATCGCTCTTG                                                                       | GTGCCGGGCT                                                                        | TTATGTGAAT                                                                        |
| CWL029   | CAGAGTTTGG                                                                      | AAGGAGTAAC                                                                      | ATCGCTCTTG                                                                       | GTGCCGGGCT                                                                        | TTATGTGAAT                                                                        |
| J138     | CAGAGTTTGG                                                                      | AAGGAGTAAC                                                                      | ATCGCTCTTG                                                                       | GTGCCGGGCT                                                                        | TTATGTGAAT                                                                        |
| TW183    | CAGAGTTTGG                                                                      | AAGGAGTAAC                                                                      | ATCGCTCTTG                                                                       | GTGCCGGGCT                                                                        | TTATGTGAAT                                                                        |
| TOR1     | CAGAGTTTGG                                                                      | AAGGAGTAAC                                                                      | ATCGCTCTTG                                                                       | GTGCCGGGCT                                                                        | TTATGTGAAT                                                                        |
| WA97001  | CAGAGTTTGG                                                                      | AAGGAGTAAC                                                                      | ATCGCTCTTG                                                                       | GTGCCGGGCT                                                                        | TTATGTGAAT                                                                        |
| 1979     | CAGAGTTTGG                                                                      | AAGGAGTAAC                                                                      | ATCGCTCTTG                                                                       | GTGCCGGGCT                                                                        | TTATGTGAAT                                                                        |
| SH511    | CAGAGTTTGG                                                                      | AAGGAGTAAC                                                                      | ATCGCTCTTG                                                                       | GTGCCGGGCT                                                                        | TTATGTGAAT                                                                        |

|          |                                                                                   |                                                                                   |                                                                                    |                                                                                     |                                                                                     |
|----------|-----------------------------------------------------------------------------------|-----------------------------------------------------------------------------------|------------------------------------------------------------------------------------|-------------------------------------------------------------------------------------|-------------------------------------------------------------------------------------|
|          | 660                                                                               | 670                                                                               | 680                                                                                | 690                                                                                 | 700                                                                                 |
| Identity |  |  |  |  |  |
| B26      | GCCTTGCAGA                                                                        | ATCTCCCTAG                                                                        | CAATTTAGCA                                                                         | GCACAATATT                                                                          | TTGGAATCGC                                                                          |
| LPCoLN   | GCCTTGCAGA                                                                        | ATCTCCCTAG                                                                        | CAATTTAGCA                                                                         | GCACAATATT                                                                          | TTGGAATCGC                                                                          |
| DE177    | GCCTTGCAGA                                                                        | ATCTCCCTAG                                                                        | CAATTTAGCA                                                                         | GCACAATATT                                                                          | TTGGAATCGC                                                                          |
| N16      |                                                                                   |                                                                                   |                                                                                    |                                                                                     |                                                                                     |
| AR39     | GCCTTGCAGA                                                                        | ATCTCCCTAG                                                                        | CAATTTAGCA                                                                         | GCACAATATT                                                                          | TTGGAATCGC                                                                          |
| CWL029   | GCCTTGCAGA                                                                        | ATCTCCCTAG                                                                        | CAATTTAGCA                                                                         | GCACAATATT                                                                          | TTGGAATCGC                                                                          |
| J138     | GCCTTGCAGA                                                                        | ATCTCCCTAG                                                                        | CAATTTAGCA                                                                         | GCACAATATT                                                                          | TTGGAATCGC                                                                          |
| TW183    | GCCTTGCAGA                                                                        | ATCTCCCTAG                                                                        | CAATTTAGCA                                                                         | GCACAATATT                                                                          | TTGGAATCGC                                                                          |
| TOR1     | GCCTTGCAGA                                                                        | ATCTCCCTAG                                                                        | CAATTTAGCA                                                                         | GCACAATATT                                                                          | TTGGAATCGC                                                                          |
| WA97001  | GCCTTGCAGA                                                                        | ATCTCCCTAG                                                                        | CAATTTAGCA                                                                         | GCACAATATT                                                                          | TTGGAATCGC                                                                          |
| 1979     | GCCTTGCAGA                                                                        | ATCTCCCTAG                                                                        | CAATTTAGCA                                                                         | GCACAATATT                                                                          | TTGGAATCGC                                                                          |
| SH511    | GCCTTGCAGA                                                                        | ATCTCCCTAG                                                                        | CAATTTAGCA                                                                         | GCACAATATT                                                                          | TTGGAATCGC                                                                          |

|          |                                                                                     |                                                                                     |                                                                                      |                                                                                       |                                                                                       |
|----------|-------------------------------------------------------------------------------------|-------------------------------------------------------------------------------------|--------------------------------------------------------------------------------------|---------------------------------------------------------------------------------------|---------------------------------------------------------------------------------------|
|          | 710                                                                                 | 720                                                                                 | 730                                                                                  | 740                                                                                   | 750                                                                                   |
| Identity |  |  |  |  |  |
| B26      | ATACAAAATA                                                                          | CGTCCTGAAT                                                                          | ATCGTTTGGG                                                                           | GGTGTTTTTG                                                                            | GACCATAATT                                                                            |
| LPCoLN   | ATACAAAATA                                                                          | CGTCCTGAAT                                                                          | ATCGTTTGGG                                                                           | GGTGTTTTTG                                                                            | GACCATAATT                                                                            |
| DE177    | ATACAAAATA                                                                          | CGTCCTGAAT                                                                          | ATCGTTTGGG                                                                           | GGTGTTTTTG                                                                            | GACCATAATT                                                                            |
| N16      |                                                                                     |                                                                                     |                                                                                      |                                                                                       |                                                                                       |
| AR39     | ATACAAAATA                                                                          | CGTCCTAAAT                                                                          | ATCGTTTGGG                                                                           | GGTGTTTTTG                                                                            | GACCATAATT                                                                            |
| CWL029   | ATACAAAATA                                                                          | CGTCCTAAAT                                                                          | ATCGTTTGGG                                                                           | GGTGTTTTTG                                                                            | GACCATAATT                                                                            |
| J138     | ATACAAAATA                                                                          | CGTCCTAAAT                                                                          | ATCGTTTGGG                                                                           | GGTGTTTTTG                                                                            | GACCATAATT                                                                            |
| TW183    | ATACAAAATA                                                                          | CGTCCTAAAT                                                                          | ATCGTTTGGG                                                                           | GGTGTTTTTG                                                                            | GACCATAATT                                                                            |
| TOR1     | ATACAAAATA                                                                          | CGTCCTAAAT                                                                          | ATCGTTTGGG                                                                           | GGTGTTTTTG                                                                            | GACCATAATT                                                                            |
| WA97001  | ATACAAAATA                                                                          | CGTCCTAAAT                                                                          | ATCGTTTGGG                                                                           | GGTGTTTTTG                                                                            | GACCATAATT                                                                            |
| 1979     | ATACAAAATA                                                                          | CGTCCTAAAT                                                                          | ATCGTTTGGG                                                                           | GGTGTTTTTG                                                                            | GACCATAATT                                                                            |
| SH511    | ATACAAAATA                                                                          | CGTCCTAAAT                                                                          | ATCGTTTGGG                                                                           | GGTGTTTTTG                                                                            | GACCATAATT                                                                            |

|          |                                                                                     |                                                                                     |                                                                                      |                                                                                       |                                                                                       |
|----------|-------------------------------------------------------------------------------------|-------------------------------------------------------------------------------------|--------------------------------------------------------------------------------------|---------------------------------------------------------------------------------------|---------------------------------------------------------------------------------------|
|          | 760                                                                                 | 770                                                                                 | 780                                                                                  | 790                                                                                   | 800                                                                                   |
| Identity |  |  |  |  |  |
| B26      | TCAGCTCCCA                                                                          | CGTTCCTAAT                                                                          | AATTTTAAACG                                                                          | TAAGCCACAA                                                                            | TAGACTCTGG                                                                            |
| LPCoLN   | TCAGCTCCCA                                                                          | CGTTCCTAAT                                                                          | AATTTTAAACG                                                                          | TAAGCCACAA                                                                            | TAGACTCTGG                                                                            |
| DE177    | TCAGCTCCCA                                                                          | CGTTCCTAAT                                                                          | AATTTTAAACG                                                                          | TAAGCCACAA                                                                            | TAGACTCTGG                                                                            |
| N16      |                                                                                     |                                                                                     |                                                                                      |                                                                                       |                                                                                       |
| AR39     | TCAGCTCCCA                                                                          | CGTTCCTAAT                                                                          | AATTTTAAACG                                                                          | TAAGCCACAA                                                                            | TAGACTCTGG                                                                            |
| CWL029   | TCAGCTCCCA                                                                          | CGTTCCTAAT                                                                          | AATTTTAAACG                                                                          | TAAGCCACAA                                                                            | TAGACTCTGG                                                                            |
| J138     | TCAGCTCCCA                                                                          | CGTTCCTAAT                                                                          | AATTTTAAACG                                                                          | TAAGCCACAA                                                                            | TAGACTCTGG                                                                            |
| TW183    | TCAGCTCCCA                                                                          | CGTTCCTAAT                                                                          | AATTTTAAACG                                                                          | TAAGCCACAA                                                                            | TAGACTCTGG                                                                            |
| TOR1     | TCAGCTCCCA                                                                          | CGTTCCTAAT                                                                          | AATTTTAAACG                                                                          | TAAGCCACAA                                                                            | TAGACTCTGG                                                                            |
| WA97001  | TCAGCTCCCA                                                                          | CGTTCCTAAT                                                                          | AATTTTAAACG                                                                          | TAAGCCACAA                                                                            | TAGACTCTGG                                                                            |
| 1979     | TCAGCTCCCA                                                                          | CGTTCCTAAT                                                                          | AATTTTAAACG                                                                          | TAAGCCACAA                                                                            | TAGACTCTGG                                                                            |
| SH511    | TCAGCTCCCA                                                                          | CGTTCCTAAT                                                                          | AATTTTAAACG                                                                          | TAAGCCACAA                                                                            | TAGACTCTGG                                                                            |

|          | 810        | 820        | 830        | 840        | 850        |
|----------|------------|------------|------------|------------|------------|
| Identity |            |            |            |            |            |
| B26      | ATGGGAGCCT | TTATTGGATG | GCAGGATTCT | GATGCTCTAG | GATCTAGTGT |
| LPCoLN   | ATGGGAGCCT | TTATTGGATG | GCAGGATTCT | GATGCTCTAG | GATCTAGTGT |
| DE177    | ATGGGAGCCT | TTATTGGATG | GCAGGATTCT | GATGCTCTAG | GATCTAGTGT |
| N16      |            |            |            |            |            |
| AR39     | ATGGGAGCCT | TTATTGGATG | GCAGGATTCT | GATGCTCTAG | GATCTAGTGT |
| CWL029   | ATGGGAGCCT | TTATTGGATG | GCAGGATTCT | GATGCTCTAG | GATCTAGTGT |
| J138     | ATGGGAGCCT | TTATTGGATG | GCAGGATTCT | GATGCTCTAG | GATCTAGTGT |
| TW183    | ATGGGAGCCT | TTATTGGATG | GCAGGATTCT | GATGCTCTAG | GATCTAGTGT |
| TOR1     | ATGGGAGCCT | TTATTGGATG | GCAGGATTCT | GATGCTCTAG | GATCTAGTGT |
| WA97001  | ATGGGAGCCT | TTATTGGATG | GCAGGATTCT | GATGCTCTAG | GATCTAGTGT |
| 1979     | ATGGGAGCCT | TTATTGGATG | GCAGGATTCT | GATGCTCTAG | GATCTAGTGT |
| SH511    | ATGGGAGCCT | TTATTGGATG | GCAGGATTCT | GATGCTCTAG | GATCTAGTGT |

|          | 860        | 870        | 880         | 890        | 900        |
|----------|------------|------------|-------------|------------|------------|
| Identity |            |            |             |            |            |
| B26      | CAAGGTGTCT | TTCGGATATG | GAAAA CAAAA | AGCCACGATT | ACAAGAGAGC |
| LPCoLN   | CAAGGTGTCT | TTCGGATATG | GAAAA CAAAA | AGCCACGATT | ACAAGAGAGC |
| DE177    | CAAGGTGTCT | TTCGGATATG | GAAAA CAAAA | AGCCACGATT | ACAAGAGAGC |
| N16      |            |            |             |            |            |
| AR39     | CAAGGTGTCT | TTCGGATATG | GAAAA CAAAA | AGCCACGATT | ACAAGAGAGC |
| CWL029   | CAAGGTGTCT | TTCGGATATG | GAAAA CAAAA | AGCCACGATT | ACAAGAGAGC |
| J138     | CAAGGTGTCT | TTCGGATATG | GAAAA CAAAA | AGCCACGATT | ACAAGAGAGC |
| TW183    | CAAGGTGTCT | TTCGGATATG | GAAAA CAAAA | AGCCACGATT | ACAAGAGAGC |
| TOR1     | CAAGGTGTCT | TTCGGATATG | GAAAA CAAAA | AGCCACGATT | ACAAGAGAGC |
| WA97001  | CAAGGTGTCT | TTCGGATATG | GAAAA CAAAA | AGCCACGATT | ACAAGAGAGC |
| 1979     | CAAGGTGTCT | TTCGGATATG | GAAAA CAAAA | AGCCACGATT | ACAAGAGAGC |
| SH511    | CAAGGTGTCT | TTCGGATATG | GAAAA CAAAA | AGCCACGATT | ACAAGAGAGC |

|          | 910        | 920        | 930        | 940        | 950        |
|----------|------------|------------|------------|------------|------------|
| Identity |            |            |            |            |            |
| B26      | AATTAGAGAA | TACAGAAGCC | GGGAGTGGGG | AGAGCCATTT | TGAAGGGGTC |
| LPCoLN   | AATTAGAGAA | TACAGAAGCC | GGGAGTGGGG | AGAGCCATTT | TGAAGGGGTC |
| DE177    | AATTAGAGAA | TACAGAAGCC | GGGAGTGGGG | AGAGCCATTT | TGAAGGGGTC |
| N16      |            |            |            |            |            |
| AR39     | AATTAGAGAA | TACAGAAGCC | GGGAGTGGGG | AGAGCCATTT | TGAAGGGGTC |
| CWL029   | AATTAGAGAA | TACAGAAGCC | GGGAGTGGGG | AGAGCCATTT | TGAAGGGGTC |
| J138     | AATTAGAGAA | TACAGAAGCC | GGGAGTGGGG | AGAGCCATTT | TGAAGGGGTC |
| TW183    | AATTAGAGAA | TACAGAAGCC | GGGAGTGGGG | AGAGCCATTT | TGAAGGGGTC |
| TOR1     | AATTAGAGAA | TACAGAAGCC | GGGAGTGGGG | AGAGCCATTT | TGAAGGGGTC |
| WA97001  | AATTAGAGAA | TACAGAAGCC | GGGAGTGGGG | AGAGCCATTT | TGAAGGGGTC |
| 1979     | AATTAGAGAA | TACAGAAGCC | GGGAGTGGGG | AGAGCCATTT | TGAAGGGGTC |
| SH511    | AATTAGAGAA | TACAGAAGCC | GGGAGTGGGG | AGAGCCATTT | TGAAGGGGTC |

|          | 960        | 970        | 980        | 990        | 1,000      |
|----------|------------|------------|------------|------------|------------|
| Identity |            |            |            |            |            |
| B26      | GCTGCTCAGA | TAGAAGGGCG | GTATGGTAAG | AGCCTCGGAG | GACATGTCAG |
| LPCoLN   | GCTGCTCAGA | TAGAAGGGCG | GTATGGTAAG | AGCCTCGGAG | GACATGTCAG |
| DE177    | GCTGCTCAGA | TAGAAGGGCG | GTATGGTAAG | AGCCTCGGAG | GACATGTCAG |
| N16      |            |            |            |            |            |
| AR39     | GCTGCTCAGA | TAGAAGGGCG | GTATGGTAAG | AGCCTCGGAG | GACATGTCAG |
| CWL029   | GCTGCTCAGA | TAGAAGGGCG | GTATGGTAAG | AGCCTCGGAG | GACATGTCAG |
| J138     | GCTGCTCAGA | TAGAAGGGCG | GTATGGTAAG | AGCCTCGGAG | GACATGTCAG |
| TW183    | GCTGCTCAGA | TAGAAGGGCG | GTATGGTAAG | AGCCTCGGAG | GACATGTCAG |
| TOR1     | GCTGCTCAGA | TAGAAGGGCG | GTATGGTAAG | AGCCTCGGAG | GACATGTCAG |
| WA97001  | GCTGCTCAGA | TAGAAGGGCG | GTATGGTAAG | AGCCTCGGAG | GACATGTCAG |
| 1979     | GCTGCTCAGA | TAGAAGGGCG | GTATGGTAAG | AGCCTCGGAG | GACATGTCAG |
| SH511    | GCTGCTCAGA | TAGAAGGGCG | GTATGGTAAG | AGCCTCGGAG | GACATGTCAG |

| Identity | 1,010      | 1,020      | 1,030      | 1,040      | 1,050      |
|----------|------------|------------|------------|------------|------------|
| B26      | GGTCCAGCCT | TTCCTAGGA  | TGCAGTTTGT | CCACATTACA | AGGAAAGAAT |
| LPCoLN   | GGTCCAGCCT | TTCCTAGGA  | TGCAGTTTGT | CCACATTACA | AGGAAAGAAT |
| DE177    | GGTCCAGCCT | TTCCTAGGA  | TGCAGTTTGT | CCACATTACA | AGGAAAGAAT |
| N16      |            |            |            |            |            |
| AR39     | GGTCCAGCCT | TTCCTAGGAC | TGCAGTTTGT | CCACATTACA | AGGAAAGAAT |
| CWL029   | GGTCCAGCCT | TTCCTAGGAC | TGCAGTTTGT | CCACATTACA | AGGAAAGAAT |
| J138     | GGTCCAGCCT | TTCCTAGGAC | TGCAGTTTGT | CCACATTACA | AGGAAAGAAT |
| TW183    | GGTCCAGCCT | TTCCTAGGAC | TGCAGTTTGT | CCACATTACA | AGGAAAGAAT |
| TOR1     | GGTCCAGCCT | TTCCTAGGAC | TGCAGTTTGT | CCACATTACA | AGGAAAGAAT |
| WA97001  | GGTCCAGCCT | TTCCTAGGAC | TGCAGTTTGT | CCACATTACA | AGGAAAGAAT |
| 1979     | GGTCCAGCCT | TTCCTAGGA  | TGCAGTTTGT | CCACATTACA | AGGAAAGAAT |
| SH511    | GGTCCAGCCT | TTCCTAGGA  | TGCAGTTTGT | CCACATTACA | AGGAAAGAAT |

| Identity | 1,060      | 1,070     | 1,080      | 1,090      | 1,100      |
|----------|------------|-----------|------------|------------|------------|
| B26      | ATACCGAAAA | TGAGAGTGC | TTTCCTGTAC | ACTATGATCC | TATAGACTAT |
| LPCoLN   | ATACCGAAAA | TGAGAGTGC | TTTCCTGTAC | ACTATGATCC | TATAGACTAT |
| DE177    | ATACCGAAAA | TGAGAGTGC | TTTCCTGTAC | ACTATGATCC | TATAGACTAT |
| N16      |            |           |            |            |            |
| AR39     | ATACCGAAAA | TGCAGTGC  | TTTCCTGTAC | ACTATGATCC | TATAGACTAT |
| CWL029   | ATACCGAAAA | TGCAGTGC  | TTTCCTGTAC | ACTATGATCC | TATAGACTAT |
| J138     | ATACCGAAAA | TGCAGTGC  | TTTCCTGTAC | ACTATGATCC | TATAGACTAT |
| TW183    | ATACCGAAAA | TGCAGTGC  | TTTCCTGTAC | ACTATGATCC | TATAGACTAT |
| TOR1     | ATACCGAAAA | TGCAGTGC  | TTTCCTGTAC | ACTATGATCC | TATAGACTAT |
| WA97001  | ATACCGAAAA | TGCAGTGC  | TTTCCTGTAC | ACTATGATCC | TATAGACTAT |
| 1979     | ATACCGAAAA | TGCAGTGC  | TTTCCTGTAC | ACTATGATCC | TATAGACTAT |
| SH511    | ATACCGAAAA | TGCAGTGC  | TTTCCTGTAC | ACTATGATCC | TATAGACTAT |

| Identity | 1,110      | 1,120      | 1,130      | 1,140      | 1,150      |
|----------|------------|------------|------------|------------|------------|
| B26      | TCTACAGGTG | TAGTGTATTT | AGGAATTGGA | TCTCATATTG | CACTTGTAGA |
| LPCoLN   | TCTACAGGTG | TAGTGTATTT | AGGAATTGGA | TCTCATATTG | CACTTGTAGA |
| DE177    | TCTACAGGTG | TAGTGTATTT | AGGAATTGGA | TCTCATATTG | CACTTGTAGA |
| N16      |            |            |            |            |            |
| AR39     | TCTACAGGTG | TAGTGTATTT | AGGAATTGGA | TCTCATATTG | CACTTGTAGA |
| CWL029   | TCTACAGGTG | TAGTGTATTT | AGGAATTGGA | TCTCATATTG | CACTTGTAGA |
| J138     | TCTACAGGTG | TAGTGTATTT | AGGAATTGGA | TCTCATATTG | CACTTGTAGA |
| TW183    | TCTACAGGTG | TAGTGTATTT | AGGAATTGGA | TCTCATATTG | CACTTGTAGA |
| TOR1     | TCTACAGGTG | TAGTGTATTT | AGGAATTGGA | TCTCATATTG | CACTTGTAGA |
| WA97001  | TCTACAGGTG | TAGTGTATTT | AGGAATTGGA | TCTCATATTG | CACTTGTAGA |
| 1979     | TCTACAGGTG | TAGTGTATTT | AGGAATTGGA | TCTCATATTG | CACTTGTAGA |
| SH511    | TCTACAGGTG | TAGTGTATTT | AGGAATTGGA | TCTCATATTG | CACTTGTAGA |

| Identity | 1,160      | 1,170      | 1,180      | 1,190     | 1,200     |
|----------|------------|------------|------------|-----------|-----------|
| B26      | TTCTTTACAT | GTAGGCACAC | GCATGGGAAT | GGAGCAAAC | TTTGAGCCC |
| LPCoLN   | TTCTTTACAT | GTAGGCACAC | GCATGGGAAT | GGAGCAAAC | TTTGAGCCC |
| DE177    | TTCTTTACAT | GTAGGCACAC | GCATGGGAAT | GGAGCAAAC | TTTGAGCCC |
| N16      |            |            |            |           |           |
| AR39     | TTCTTTACAT | GTAGGCACAC | GCATGGGAAT | GGAGCAAAC | TTTGAGCCC |
| CWL029   | TTCTTTACAT | GTAGGCACAC | GCATGGGAAT | GGAGCAAAC | TTTGAGCCC |
| J138     | TTCTTTACAT | GTAGGCACAC | GCATGGGAAT | GGAGCAAAC | TTTGAGCCC |
| TW183    | TTCTTTACAT | GTAGGCACAC | GCATGGGAAT | GGAGCAAAC | TTTGAGCCC |
| TOR1     | TTCTTTACAT | GTAGGCACAC | GCATGGGAAT | GGAGCAAAC | TTTGAGCCC |
| WA97001  | TTCTTTACAT | GTAGGCACAC | GCATGGGAAT | GGAGCAAAC | TTTGAGCCC |
| 1979     | TTCTTTACAT | GTAGGCACAC | GCATGGGAAT | GGAGCAAAC | TTTGAGCCC |
| SH511    | TTCTTTACAT | GTAGGCACAC | GCATGGGAAT | GGAGCAAAC | TTTGAGCCC |

1,210 1,220 1,230 1,240 1,250

Identity

B26 ATACGGAGAG GTTCTCAGGA TCTATAGCGT CTATTGGAAA CTTTGTGTTT  
 LPCoLN ATACGGAGAG GTTCTCAGGA TCTATAGCGT CTATTGGAAA CTTTGTGTTT  
 DE177 ATACGGACAG GTTCTCAGGA TCTATAGCGT CTATTGGAAA CTTTGTGTTT  
 N16  
 AR39 ATACGGACAG GTTCTCAGGA TCTATAGCGT CTATTGGAAA CTTTGTGTTT  
 CWL029 ATACGGACAG GTTCTCAGGA TCTATAGCGT CTATTGGAAA CTTTGTGTTT  
 J138 ATACGGACAG GTTCTCAGGA TCTATAGCGT CTATTGGAAA CTTTGTGTTT  
 TW183 ATACGGACAG GTTCTCAGGA TCTATAGCGT CTATTGGAAA CTTTGTGTTT  
 TOR1 ATACGGACAG GTTCTCAGGA TCTATAGCGT CTATTGGAAA CTTTGTGTTT  
 WA97001 ATACGGACAG GTTCTCAGGA TCTATAGCGT CTATTGGAAA CTTTGTGTTT  
 1979 ATACGGACAG GTTCTCAGGA TCTATAGCGT CTATTGGAAA CTTTGTGTTT  
 SH511 ATACGGACAG GTTCTCAGGA TCTATAGCGT CTATTGGAAA CTTTGTGTTT

1,260 1,270 1,280 1,290 1,300

Identity

B26 GAAAAGCTTG ATGTGACTCA CACAAGGGCA TTTGCGGAAA TGC GTGTCAA  
 LPCoLN GAAAAGCTTG ATGTGACTCA CACAAGGGCA TTTGCGGAAA TGC GTGTCAA  
 DE177 GAAAAGCTTG ATGTGACTCA CACAAGGGCA TTTGCGGAAA TGC GTGTCAA  
 N16  
 AR39 GAAAAGCTTG ATGTGACTCA CACAAGGGCA TTTGCGGAAA TGC GTGTCAA  
 CWL029 GAAAAGCTTG ATGTGACTCA CACAAGGGCA TTTGCGGAAA TGC GTGTCAA  
 J138 GAAAAGCTTG ATGTGACTCA CACAAGGGCA TTTGCGGAAA TGC GTGTCAA  
 TW183 GAAAAGCTTG ATGTGACTCA CACAAGGGCA TTTGCGGAAA TGC GTGTCAA  
 TOR1 GAAAAGCTTG ATGTGACTCA CACAAGGGCA TTTGCGGAAA TGC GTGTCAA  
 WA97001 GAAAAGCTTG ATGTGACTCA CACAAGGGCA TTTGCGGAAA TGC GTGTCAA  
 1979 GAAAAGCTTG ATGTGACTCA CACAAGGGCA TTTGCGGAAA TGC GTGTCAA  
 SH511 GAAAAGCTTG ATGTGACTCA CACAAGGGCA TTTGCGGAAA TGC GTGTCAA

1,310 1,320 1,330 1,340 1,350

Identity

B26 CTATGAGCTT CCCTATCTAC AGTCTCTGAA TCTTATTCTA CGAGTTAATC  
 LPCoLN CTATGAGCTT CCCTATCTAC AGTCTCTGAA TCTTATTCTA CGAGTTAATC  
 DE177 CTATGAGCTT CCCTATCTAC AGTCTCTGAA TCTTATTCTA CGAGTTAATC  
 N16  
 AR39 CTATGAGCTT CCCTATCTAC AGTCTCTGAA TCTTATTCTA CGAGTTAATC  
 CWL029 CTATGAGCTT CCCTATCTAC AGTCTCTGAA TCTTATTCTA CGAGTTAATC  
 J138 CTATGAGCTT CCCTATCTAC AGTCTCTGAA TCTTATTCTA CGAGTTAATC  
 TW183 CTATGAGCTT CCCTATCTAC AGTCTCTGAA TCTTATTCTA CGAGTTAATC  
 TOR1 CTATGAGCTT CCCTATCTAC AGTCTCTGAA TCTTATTCTA CGAGTTAATC  
 WA97001 CTATGAGCTT CCCTATCTAC AGTCTCTGAA TCTTATTCTA CGAGTTAATC  
 1979 CTATGAGCTT CCCTATCTAC AGTCTCTGAA TCTTATTCTA CGAGTTAATC  
 SH511 CTATGAGCTT CCCTATCTAC AGTCTCTGAA TCTTATTCTA CGAGTTAATC

1,360 1,370 1,380 1,390 1,400

Identity

B26 AACAGCCTCT ACAAGGGGTT ATGGGATTTT CCAGTGATCT TAGGTATGCC  
 LPCoLN AACAGCCTCT ACAAGGGGTT ATGGGATTTT CCAGTGATCT TAGGTATGCC  
 DE177 AACAGCCTCT ACAAGGGGTT ATGGGATTTT CCAGTGATCT TAGGTATGCC  
 N16  
 AR39 AACAGCCTCT ACAAGGGGTT ATGGGATTTT CCAGTGATCT TAGGTATGCC  
 CWL029 AACAGCCTCT ACAAGGGGTT ATGGGATTTT CCAGTGATCT TAGGTATGCC  
 J138 AACAGCCTCT ACAAGGGGTT ATGGGATTTT CCAGTGATCT TAGGTATGCC  
 TW183 AACAGCCTCT ACAAGGGGTT ATGGGATTTT CCAGTGATCT TAGGTATGCC  
 TOR1 AACAGCCTCT ACAAGGGGTT ATGGGATTTT CCAGTGATCT TAGGTATGCC  
 WA97001 AACAGCCTCT ACAAGGGGTT ATGGGATTTT CCAGTGATCT TAGGTATGCC  
 1979 AACAGCCTCT ACAAGGGGTT ATGGGATTTT CCAGTGATCT TAGGTATGCC  
 SH511 AACAGCCTCT ACAAGGGGTT ATGGGATTTT CCAGTGATCT TAGGTATGCC

1,410 1,413

Identity

B26 TTAGGATTCT AA  
 LPCoLN TTAGGATTCT AA  
 DE177 TTAGGATTCT AA  
 N16  
 AR39 TTAGGATTCT AA  
 CWL029 TTAGGATTCT AA  
 J138 TTAGGATTCT AA  
 TW183 TTAGGATTCT AA  
 TOR1 TTAGGATTCT AA  
 WA97001 TTAGGATTCT AA  
 1979 TTAGGATTCT AA  
 SH511 TTAGGATTCT AA





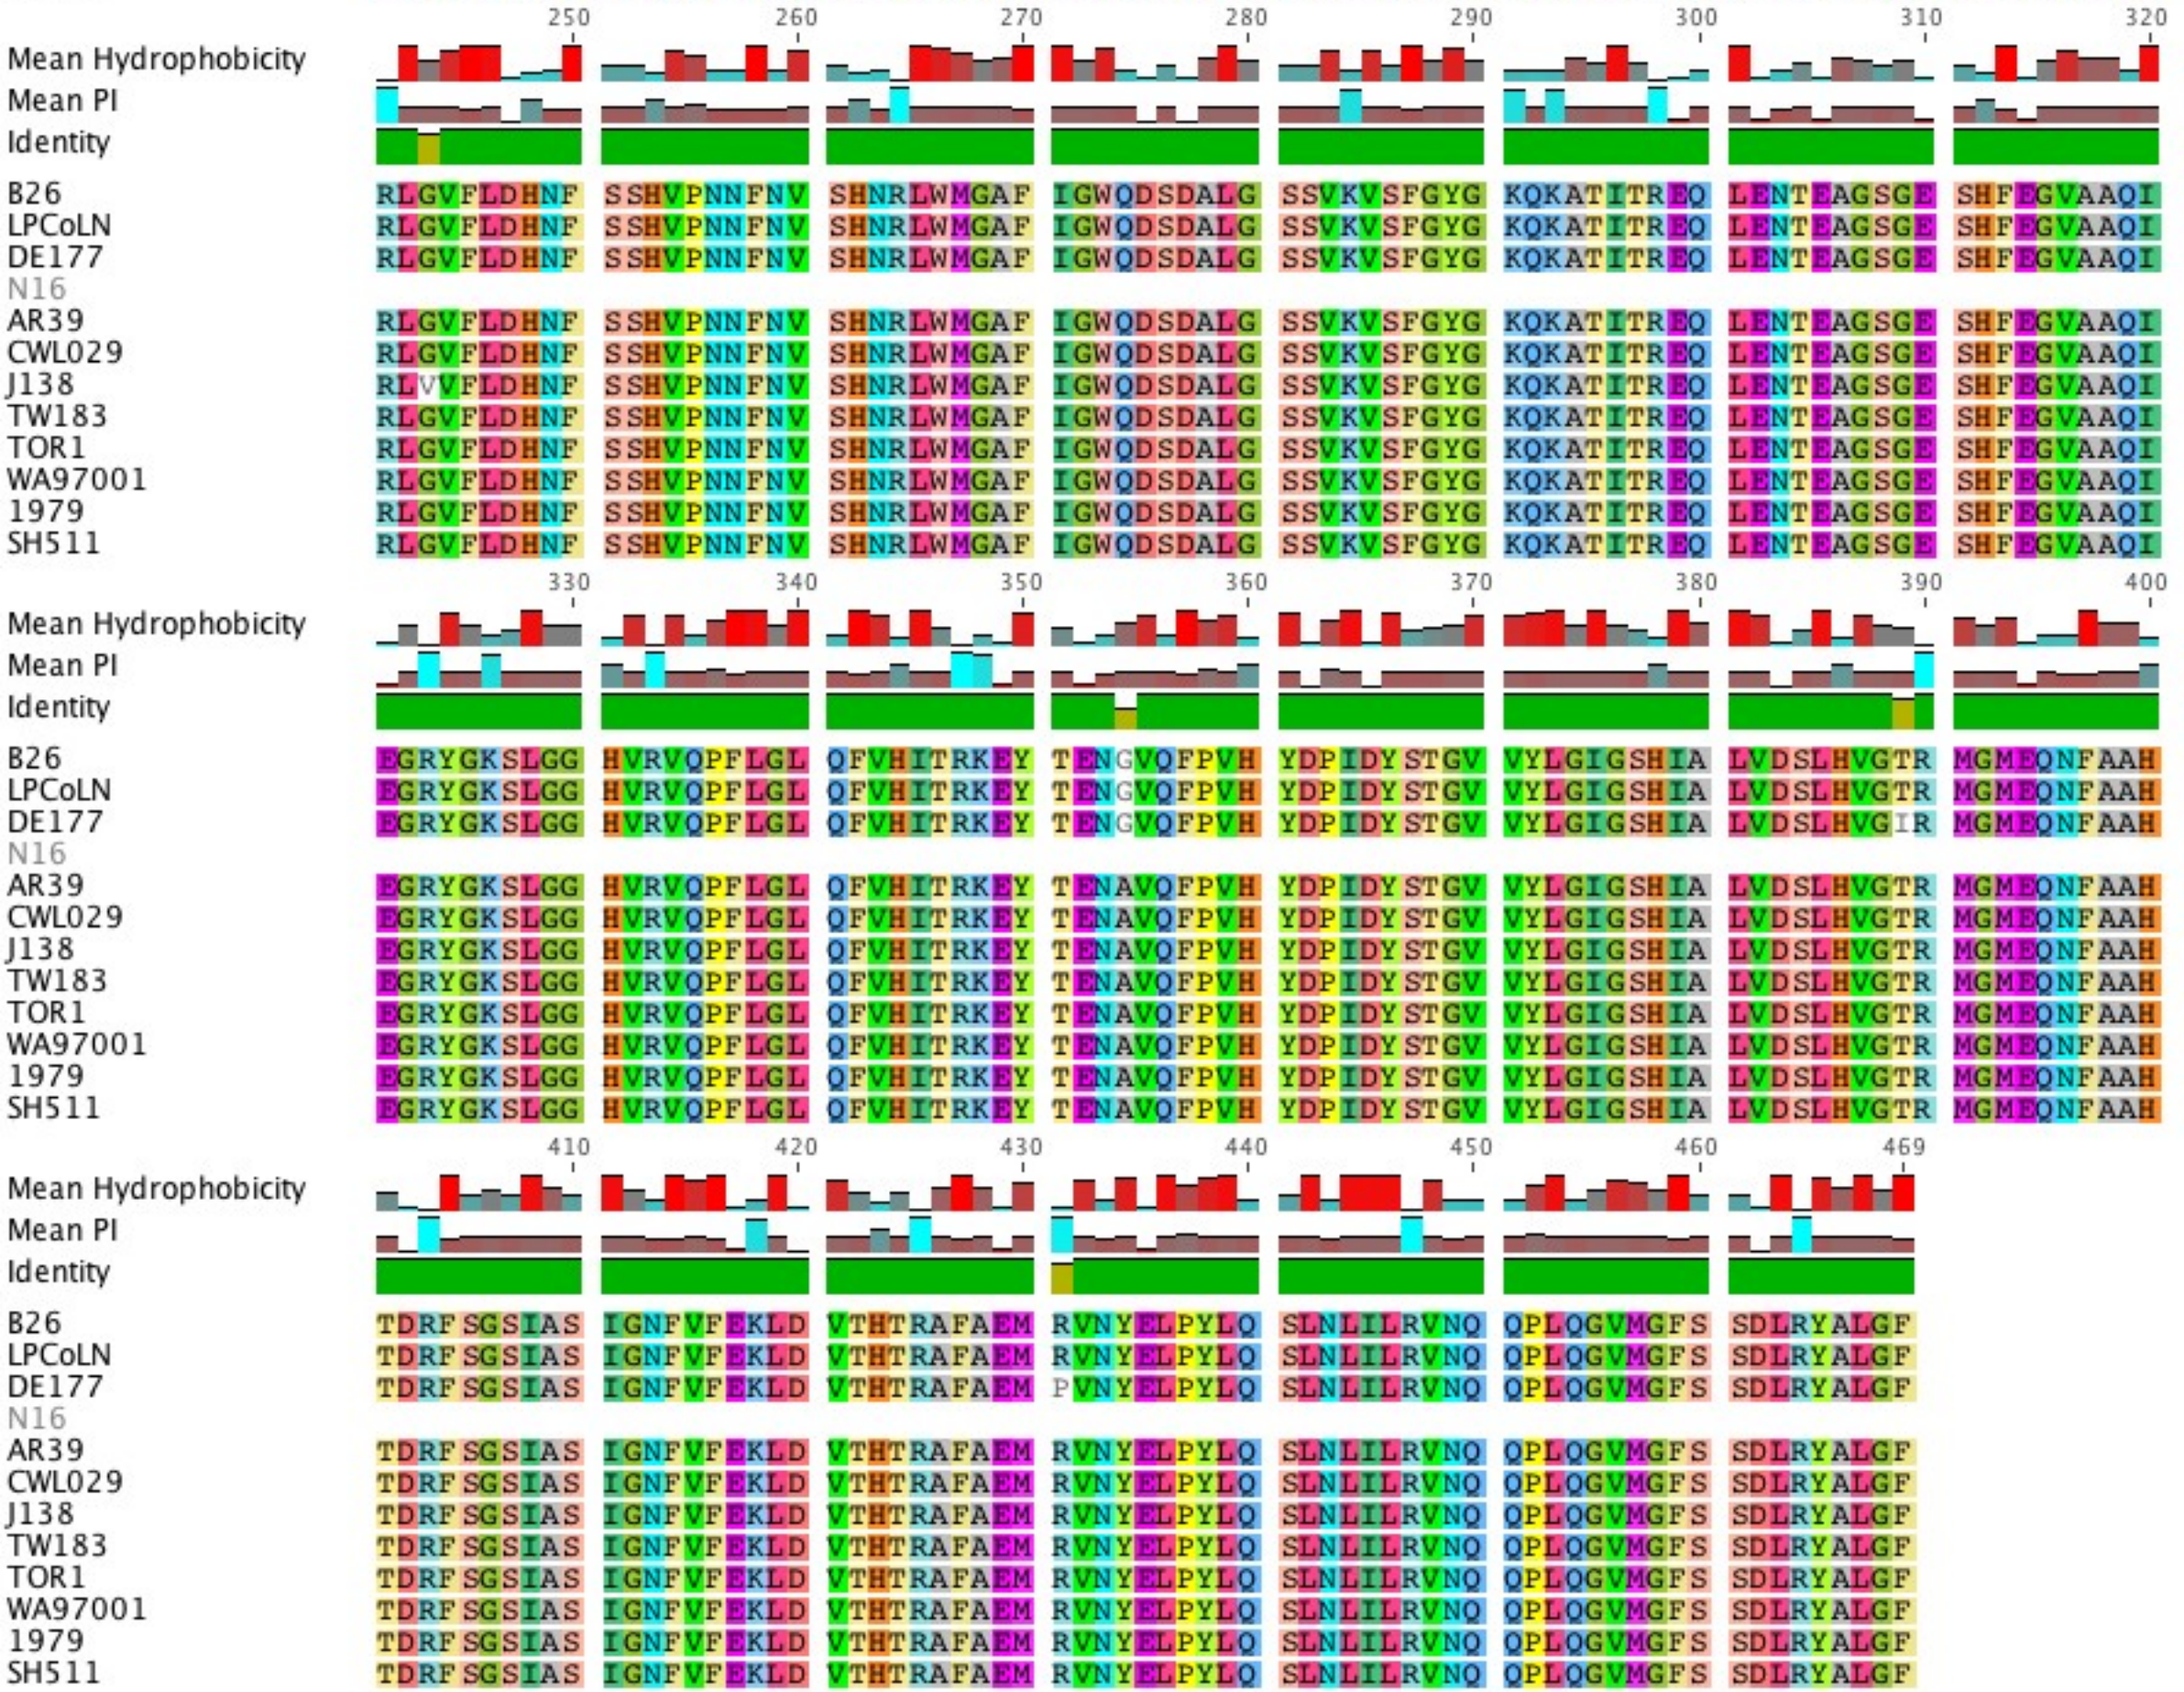

Supplement: ppat.1000903.s016.pdf [file ppat.1000903.s016.pdf]
