# Supplementary material for: Chlamydia pneumoniae Is Genetically Diverse in Animals and Appears to Have Crossed the Host Barrier to Humans on (At Least) Two Occasions
Source: PubMed Central journal article supplement (PMC2873915; doi:10.1371/journal.ppat.1000903), 2010-05-20

|          | 1          | 10         | 20         | 30         | 40         | 50 |
|----------|------------|------------|------------|------------|------------|----|
| Identity |            |            |            |            |            |    |
| DE177    | CAGTTTTAGA | AATAAAATCC | CAGTTCCCAC | AAATTTCTTT | AGTTGTAGGG |    |
| N16      | CAGTTTTAGA | AATAAAATCC | TAGTTCCCAC | AAATTTCTTT | AGTTGTAGGG |    |
| AR39     | CAGTTTTAGA | AATAAAATCC | CAGTTCCCAC | AAATTTCTTT | AGTTGTAGGG |    |
| CWL029   | CAGTTTTAGA | AATAAAATCC | CAGTTCCCAC | AAATTTCTTT | AGTTGTAGGG |    |
| TW183    | CAGTTTTAGA | AATAAAATCC | CAGTTCCCAC | AAATTTCTTT | AGTTGTAGGG |    |
| IOL207   | CAGTTTTAGA | AATAAAATCC | CAGTTCCCAC | AAATTTCTTT | AGTTGTAGGG |    |
| TOR1     | CAGTTTTAGA | AATAAAATCC | CAGTTCCCAC | AAATTTCTTT | AGTTGTAGGG |    |
| WA97001  | CAGTTTTAGA | AATAAAATCC | CAGTTCCCAC | AAATTTCTTT | AGTTGTAGGG |    |
| 1979     | CAGTTTTAGA | AATAAAATCC | CAGTTCCCAC | AAATTTCTTT | AGTTGTAGGG |    |
| SH511    | CAGTTTTAGA | AATAAAATCC | CAGTTCCCAC | AAATTTCTTT | AGTTGTAGGG |    |

|          | 60         | 70         | 80         | 90         | 100        |  |
|----------|------------|------------|------------|------------|------------|--|
| Identity |            |            |            |            |            |  |
| DE177    | AATCTTGTTA | TAGCTGAAGC | CGCAGTTTCC | TTAGCTGAGA | TTGGAGTTGA |  |
| N16      | AATCTTGTTA | CAGCTGAAGC | CGCAGTTTCC | TTAGCTGAGA | TTGGAGTTGA |  |
| AR39     | AATCTTGTTA | CAGCTGAAGC | CGCAGTTTCC | TTAGCTGAGA | TTGGAGTTGA |  |
| CWL029   | AATCTTGTTA | CAGCTGAAGC | CGCAGTTTCC | TTAGCTGAGA | TTGGAGTTGA |  |
| TW183    | AATCTTGTTA | CAGCTGAAGC | CGCAGTTTCC | TTAGCTGAGA | TTGGAGTTGA |  |
| IOL207   | AATCTTGTTA | CAGCTGAAGC | CGCAGTTTCC | TTAGCTGAGA | TTGGAGTTGA |  |
| TOR1     | AATCTTGTTA | CAGCTGAAGC | CGCAGTTTCC | TTAGCTGAGA | TTGGAGTTGA |  |
| WA97001  | AATCTTGTTA | CAGCTGAAGC | CGCAGTTTCC | TTAGCTGAGA | TTGGAGTTGA |  |
| 1979     | AATCTTGTTA | CAGCTGAAGC | TGCAGTCTCC | TTAGCTGAGA | TTGGAGTTGA |  |
| SH511    | AATCTTGTTA | CAGCTGAAGC | TGCAGTCTCC | TTAGCTGAGA | TTGGAGTTGA |  |

|          | 110        | 120        | 130        | 140        | 150        |  |
|----------|------------|------------|------------|------------|------------|--|
| Identity |            |            |            |            |            |  |
| DE177    | CGCTGTAAAG | GTAGGTATTG | GCCCAGGATC | TATCTGTACA | ACTAGAATCG |  |
| N16      | CGCTGTAAAG | GTAGGTATTG | GCCCAGGATC | TATCTGTACA | ACTAGAATCG |  |
| AR39     | CGCTGTAAAG | GTAGGTATTG | GCCCAGGATC | TATCTGTACA | ACTAGAATCG |  |
| CWL029   | CGCTGTAAAG | GTAGGTATTG | GCCCAGGATC | TATCTGTACA | ACTAGAATCG |  |
| TW183    | CGCTGTAAAG | GTAGGTATTG | GCCCAGGATC | TATCTGTACA | ACTAGAATCG |  |
| IOL207   | CGCTGTAAAG | GTAGGTATTG | GCCCAGGATC | TATCTGTACA | ACTAGAATCG |  |
| TOR1     | CGCTGTAAAG | GTAGGTATTG | GCCCAGGATC | TATCTGTACA | ACTAGAATCG |  |
| WA97001  | CGCTGTAAAG | GTAGGTATTG | GCCCAGGATC | TATCTGTACA | ACTAGAATCG |  |
| 1979     | CGCTGTAAAG | GTAGGTATTG | GCCCAGGATC | TATCTGTACA | ACTAGAATCG |  |
| SH511    | CGCTGTAAAG | GTAGGTATTG | GCCCAGGATC | TATCTGTACA | ACTAGAATCG |  |

|          | 160        | 170        | 180         | 190        | 200        |  |
|----------|------------|------------|-------------|------------|------------|--|
| Identity |            |            |             |            |            |  |
| DE177    | TTTCAGGGGT | CGGTTATCCA | CAAATTA CTG | CCATTACAAA | CGTAGCAAAA |  |
| N16      | TTTCAGGGGT | CGGTTATCCA | TAAATTA CTG | CCATTACAAA | CGTAGCAAAA |  |
| AR39     | TTTCAGGGGT | CGGTTATCCA | CAAATTA CTG | CCATTACAAA | CGTAGCAAAA |  |
| CWL029   | TTTCAGGGGT | CGGTTATCCA | CAAATTA CTG | CCATTACAAA | CGTAGCAAAA |  |
| TW183    | TTTCAGGGGT | CGGTTATCCA | CAAATTA CTG | CCATTACAAA | CGTAGCAAAA |  |
| IOL207   | TTTCAGGGGT | CGGTTATCCA | CAAATTA CTG | CCATTACAAA | CGTAGCAAAA |  |
| TOR1     | TTTCAGGGGT | CGGTTATCCA | CAAATTA CTG | CCATTACAAA | CGTAGCAAAA |  |
| WA97001  | TTTCAGGGGT | CGGTTATCCA | CAAATTA CTG | CCATTACAAA | CGTAGCAAAA |  |
| 1979     | TTTCAGGGGT | CGGTTATCCA | CAAATTA CTG | CCATTACAAA | CGTAGCAAAA |  |
| SH511    | TTTCAGGGGT | CGGTTATCCA | CAAATTA CTG | CCATTACAAA | CGTAGCAAAA |  |

|          | 210        | 220        | 230        | 240        | 250        |
|----------|------------|------------|------------|------------|------------|
| Identity |            |            |            |            |            |
| DE177    | GCTCTTAAAA | ACTCTGCCGT | GACTGTAATT | GCTGATGGGG | GAATCCGCTA |
| N16      | GCTCTTAAAA | ACTCTGCCGT | GACTGTAATT | GCTGATGGGG | GAATCCACTA |
| AR39     | GCTCTTAAAA | ACTCTGCCGT | GACTGTAATT | GCTGATGGGA | GAATCCGCTA |
| CWL029   | GCTCTTAAAA | ACTCTGCCGT | GACTGTAATT | GCTGATGGGA | GAATCCGCTA |
| TW183    | GCTCTTAAAA | ACTCTGCCGT | GACTGTAATT | GCTGATGGGA | GAATCCGCTA |
| IOL207   | GCTCTTAAAA | ACTCTGCCGT | GACTGTAATT | GCTGATGGGA | GAATCCGCTA |
| TOR1     | GCTCTTAAAA | ACTCTGCCGT | GACTGTAATT | GCTGATGGGA | GAATCCGCTA |
| WA97001  | GCTCTTAAAA | ACTCTGCCGT | GACTGTAATT | GCTGATGGGA | GAATCCGCTA |
| 1979     | GCTCTTAAAA | ACTCTGCCGT | GACTGTAATT | GCTGATGGGG | GAATCCGCTA |
| SH511    | GCTCTTAAAA | ACTCTGCCGT | GACTGTAATT | GCTGATGGGG | GAATCCGCTA |

|          | 260        | 270        | 280        | 290        | 300        |
|----------|------------|------------|------------|------------|------------|
| Identity |            |            |            |            |            |
| DE177    | TTCTGGAGAT | GTGGTAAAAG | CATTAGCAGC | AGGAGCAGAC | TGTGTCATGC |
| N16      | TTCTGGAGAT | GTGGTAAAAG | CATTAGCAGC | AGGAGCAGAC | TGTGTCATGC |
| AR39     | TTCTGGAGAT | GTGGTAAAAG | CATTAGCAGC | AGGAGCAGAC | TGTGTCATGC |
| CWL029   | TTCTGGAGAT | GTGGTAAAAG | CATTAGCAGC | AGGAGCAGAC | TGTGTCATGC |
| TW183    | TTCTGGAGAT | GTGGTAAAAG | CATTAGCAGC | AGGAGCAGAC | TGTGTCATGC |
| IOL207   | TTCTGGAGAT | GTGGTAAAAG | CATTAGCAGC | AGGAGCAGAC | TGTGTCATGC |
| TOR1     | TTCTGGAGAT | GTGGTAAAAG | CATTAGCAGC | AGGAGCAGAC | TGTGTCATGC |
| WA97001  | TTCTGGAGAT | GTGGTAAAAG | CATTAGCAGC | AGGAGCAGAC | TGTGTCATGC |
| 1979     | TTCTGGAGAT | GTGGTAAAAG | CATTAGCAGC | AGGAGCAGAC | TGTGTCATGC |
| SH511    | TTCTGGAGAT | GTGGTAAAAG | CATTAGCAGC | AGGAGCAGAC | TGTGTCATGC |

|          | 310        | 320        | 330        | 340        | 350        |
|----------|------------|------------|------------|------------|------------|
| Identity |            |            |            |            |            |
| DE177    | TAGGAAGTTT | GCTTGCAGGG | ACTGATGAAG | CTCCTGGGGA | TATCGTTTCT |
| N16      | TAGGAAGTTT | GCTTGCAGGG | ACTGATGAAG | CTCCTGGGGA | TATCGTTTCT |
| AR39     | TAGGAAGTTT | GCTTGCAGGG | ACTGATGAAG | CTCCTGGGGA | TATCGTTTCT |
| CWL029   | TAGGAAGTTT | GCTTGCAGGG | ACTGATGAAG | CTCCTGGGGA | TATCGTTTCT |
| TW183    | TAGGAAGTTT | GCTTGCAGGG | ACTGATGAAG | CTCCTGGGGA | TATCGTTTCT |
| IOL207   | TAGGAAGTTT | GCTTGCAGGG | ACTGATGAAG | CTCCTGGGGA | TATCGTTTCT |
| TOR1     | TAGGAAGTTT | GCTTGCAGGG | ACTGATGAAG | CTCCTGGGGA | TATCGTTTCT |
| WA97001  | TAGGAAGTTT | GCTTGCAGGG | ACTGATGAAG | CTCCTGGGGA | TATCGTTTCT |
| 1979     | TAGGAAGTTT | GCTTGCAGGG | ACTGCTGAAG | CTCCTGGGGA | TATCGTTTCT |
| SH511    | TAGGAAGTTT | GCTTGCAGGG | ACTGCTGAAG | CTCCTGGGGA | TATCGTTTCT |

|          | 360        | 370         | 380        | 390        | 400        |
|----------|------------|-------------|------------|------------|------------|
| Identity |            |             |            |            |            |
| DE177    | ATCGATGAGA | AGCTTTTTTAA | AAGGTACCGC | GGCATGGGAT | CTTTAGGCGC |
| N16      | ATCGATGAGA | AGCTTTTTTAA | AAGGTACCGC | GGCATGGGAT | CTTTAGGCGC |
| AR39     | ATCGATGAGA | AGCTTTTTTAA | AAGGTACCGC | GGCATGGGAT | CTTTAGGCGC |
| CWL029   | ATCGATGAGA | AGCTTTTTTAA | AAGGTACCGC | GGCATGGGAT | CTTTAGGCGC |
| TW183    | ATCGATGAGA | AGCTTTTTTAA | AAGGTACCGC | GGCATGGGAT | CTTTAGGCGC |
| IOL207   | ATCGATGAGA | AGCTTTTTTAA | AAGGTACCGC | GGCATGGGAT | CTTTAGGCGC |
| TOR1     | ATCGATGAGA | AGCTTTTTTAA | AAGGTACCGC | GGCATGGGAT | CTTTAGGCGC |
| WA97001  | ATCGATGAGA | AGCTTTTTTAA | AAGGTACCGC | GGCATGGGAT | CTTTAGGCGC |
| 1979     | ATCGATGAGA | GGCTTTTTTAA | AAGGTACCGC | GGCATGGGAT | CTTTAGGCGC |
| SH511    | ATCGATGAGA | GGCTTTTTTAA | AAGGTACCGC | GGCATGGGAT | CTTTAGGCGC |

|          | 410        | 420        | 430        | 440        | 450        |
|----------|------------|------------|------------|------------|------------|
| Identity |            |            |            |            |            |
| DE177    | TATGAAACAA | GGAAGTGCTG | ACCGGTATTT | TCAAACACAG | GGACAGAAAA |
| N16      | TATGAAACAA | GGAAGTGCTG | ACCGGTATTT | TCAAACACAG | GGACAGAAAA |
| AR39     | TATGAAACAA | GGAAGTGCTG | ACCGGTATTT | TCAAACACAG | GGACAGAAAA |
| CWL029   | TATGAAACAA | GGAAGTGCTG | ACCGGTATTT | TCAAACACAG | GGACAGAAAA |
| TW183    | TATGAAACAA | GGAAGTGCTG | ACCGGTATTT | TCAAACACAG | GGACAGAAAA |
| IOL207   | TATGAAACAA | GGAAGTGCTG | ACCGGTATTT | TCAAACACAG | GGACAGAAAA |
| TOR1     | TATGAAACAA | GGAAGTGCTG | ACCGGTATTT | TCAAACACAG | GGACAGAAAA |
| WA97001  | TATGAAACAA | GGAAGTGCTG | ACCGGTATTT | TCAAACACAG | GGACAGAAAA |
| 1979     | TATGAAACAA | GGAAGTGCTG | ACCGGTATTT | TCAAACACAG | GGACAGAAAA |
| SH511    | TATGAAACAA | GGAAGTGCTG | ACCGGTATTT | TCAAACACAG | GGACAGAAAA |

|          | 460        | 470        | 480        | 490         | 500        |
|----------|------------|------------|------------|-------------|------------|
| Identity |            |            |            |             |            |
| DE177    | AGCTGGTTCC | TGAGGGAGTT | GAAGGACTAG | TCGCTTATAA  | AGGCTCTGTC |
| N16      | AGCTGGTTCC | TGAGGGAGTT | GAAGGACTAG | TCAGCTTATAA | AGGCTCTGTC |
| AR39     | AGCTGGTTCC | TGGGGGAGTT | GAAGGACTAG | TCGCTTATAA  | AGGCTCTGTC |
| CWL029   | AGCTGGTTCC | TGGGGGAGTT | GAAGGACTAG | TCGCTTATAA  | AGGCTCTGTC |
| TW183    | AGCTGGTTCC | TGGGGGAGTT | GAAGGACTAG | TCGCTTATAA  | AGGCTCTGTC |
| IOL207   | AGCTGGTTCC | TGGGGGAGTT | GAAGGACTAG | TCGCTTATAA  | AGGCTCTGTC |
| TOR1     | AGCTGGTTCC | TGGGGGAGTT | GAAGGACTAG | TCGCTTATAA  | AGGCTCTGTC |
| WA97001  | AGCTGGTTCC | TGGGGGAGTT | GAAGGACTAG | TCGCTTATAA  | AGGCTCTGTC |
| 1979     | AGCTGGTTCC | TGAGGGAGTT | GAAGGACTAG | TCGCTTATAA  | AGGCTCTGTC |
| SH511    | AGCTGGTTCC | TGAGGGAGTT | GAAGGACTAG | TCGCTTATAA  | AGGCTCTGTC |

|          | 510        | 520        | 530        | 540        | 550        |
|----------|------------|------------|------------|------------|------------|
| Identity |            |            |            |            |            |
| DE177    | CACGATGTCC | TCTATCAAAT | TTTAGGAGGA | ATACGCTCAG | GTATGGGGTA |
| N16      | CACGATGTCC | TCTATCAAAT | TTTAGGAGGA | ATACGCTCAG | GTATGGGGTA |
| AR39     | CACGATGTCC | TCTATCAAAT | TTTAGGAGGA | ATACGCTCAG | GTATGGGGTA |
| CWL029   | CACGATGTCC | TCTATCAAAT | TTTAGGAGGA | ATACGCTCAG | GTATGGGGTA |
| TW183    | CACGATGTCC | TCTATCAAAT | TTTAGGAGGA | ATACGCTCAG | GTATGGGGTA |
| IOL207   | CACGATGTCC | TCTATCAAAT | TTTAGGAGGA | ATACGCTCAG | GTATGGGGTA |
| TOR1     | CACGATGTCC | TCTATCAAAT | TTTAGGAGGA | ATACGCTCAG | GTATGGGGTA |
| WA97001  | CACGATGTCC | TCTATCAAAT | TTTAGGAGGA | ATACGCTCAG | GTATGGGGTA |
| 1979     | CACGATGTCC | TCTATCAAAT | TTTAGGAGGA | ATACGCTCAG | GTATGGGGTA |
| SH511    | CACGATGTCC | TCTATCAAAT | TTTAGGAGGA | ATACGCTCAG | GTATGGGGTA |

|          | 560        | 570        | 580        | 590        |            |
|----------|------------|------------|------------|------------|------------|
| Identity |            |            |            |            |            |
| DE177    | TGTTGGAGCT | GAAACTCTCA | AAGATTTAAA | AACTAAGGCT | TCCTTTGTTC |
| N16      | TGTTGGAGCT | GAAACTCTCA | AAGATTTAAA | AACTAAGGCT | TCCTTTGTTC |
| AR39     | TGTTGGAGCT | GAAACTCTCA | AAGATTTAAA | AACTAAGGCT | TCCTTTGTTC |
| CWL029   | TGTTGGAGCT | GAAACTCTCA | AAGATTTAAA | AACTAAGGCT | TCCTTTGTTC |
| TW183    | TGTTGGAGCT | GAAACTCTCA | AAGATTTAAA | AACTAAGGCT | TCCTTTGTTC |
| IOL207   | TGTTGGAGCT | GAAACTCTCA | AAGATTTAAA | AACTAAGGCT | TCCTTTGTTC |
| TOR1     | TGTTGGAGCT | GAAACTCTCA | AAGATTTAAA | AACTAAGGCT | TCCTTTGTTC |
| WA97001  | TGTTGGAGCT | GAAACTCTCA | AAGATTTAAA | AACTAAGGCT | TCCTTTGTTC |
| 1979     | TGTTGGAGCT | GAAACTCTCA | AAGATTTAAA | AACTAAGGCT | TCCTTTGTTC |
| SH511    | TGTTGGAGCT | GAAACTCTCA | AAGATTTAAA | AACTAAGGCT | TCCTTTGTTC |

|          | 606    |
|----------|--------|
| Identity |        |
| DE177    | GAATTA |
| N16      | GAATTA |
| AR39     | GAATTA |
| CWL029   | GAATTA |
| TW183    | GAATTA |
| IOL207   | GAATTA |
| TOR1     | GAATTA |
| WA97001  | GAATTA |
| 1979     | GAATTA |
| SH511    | GAATTA |

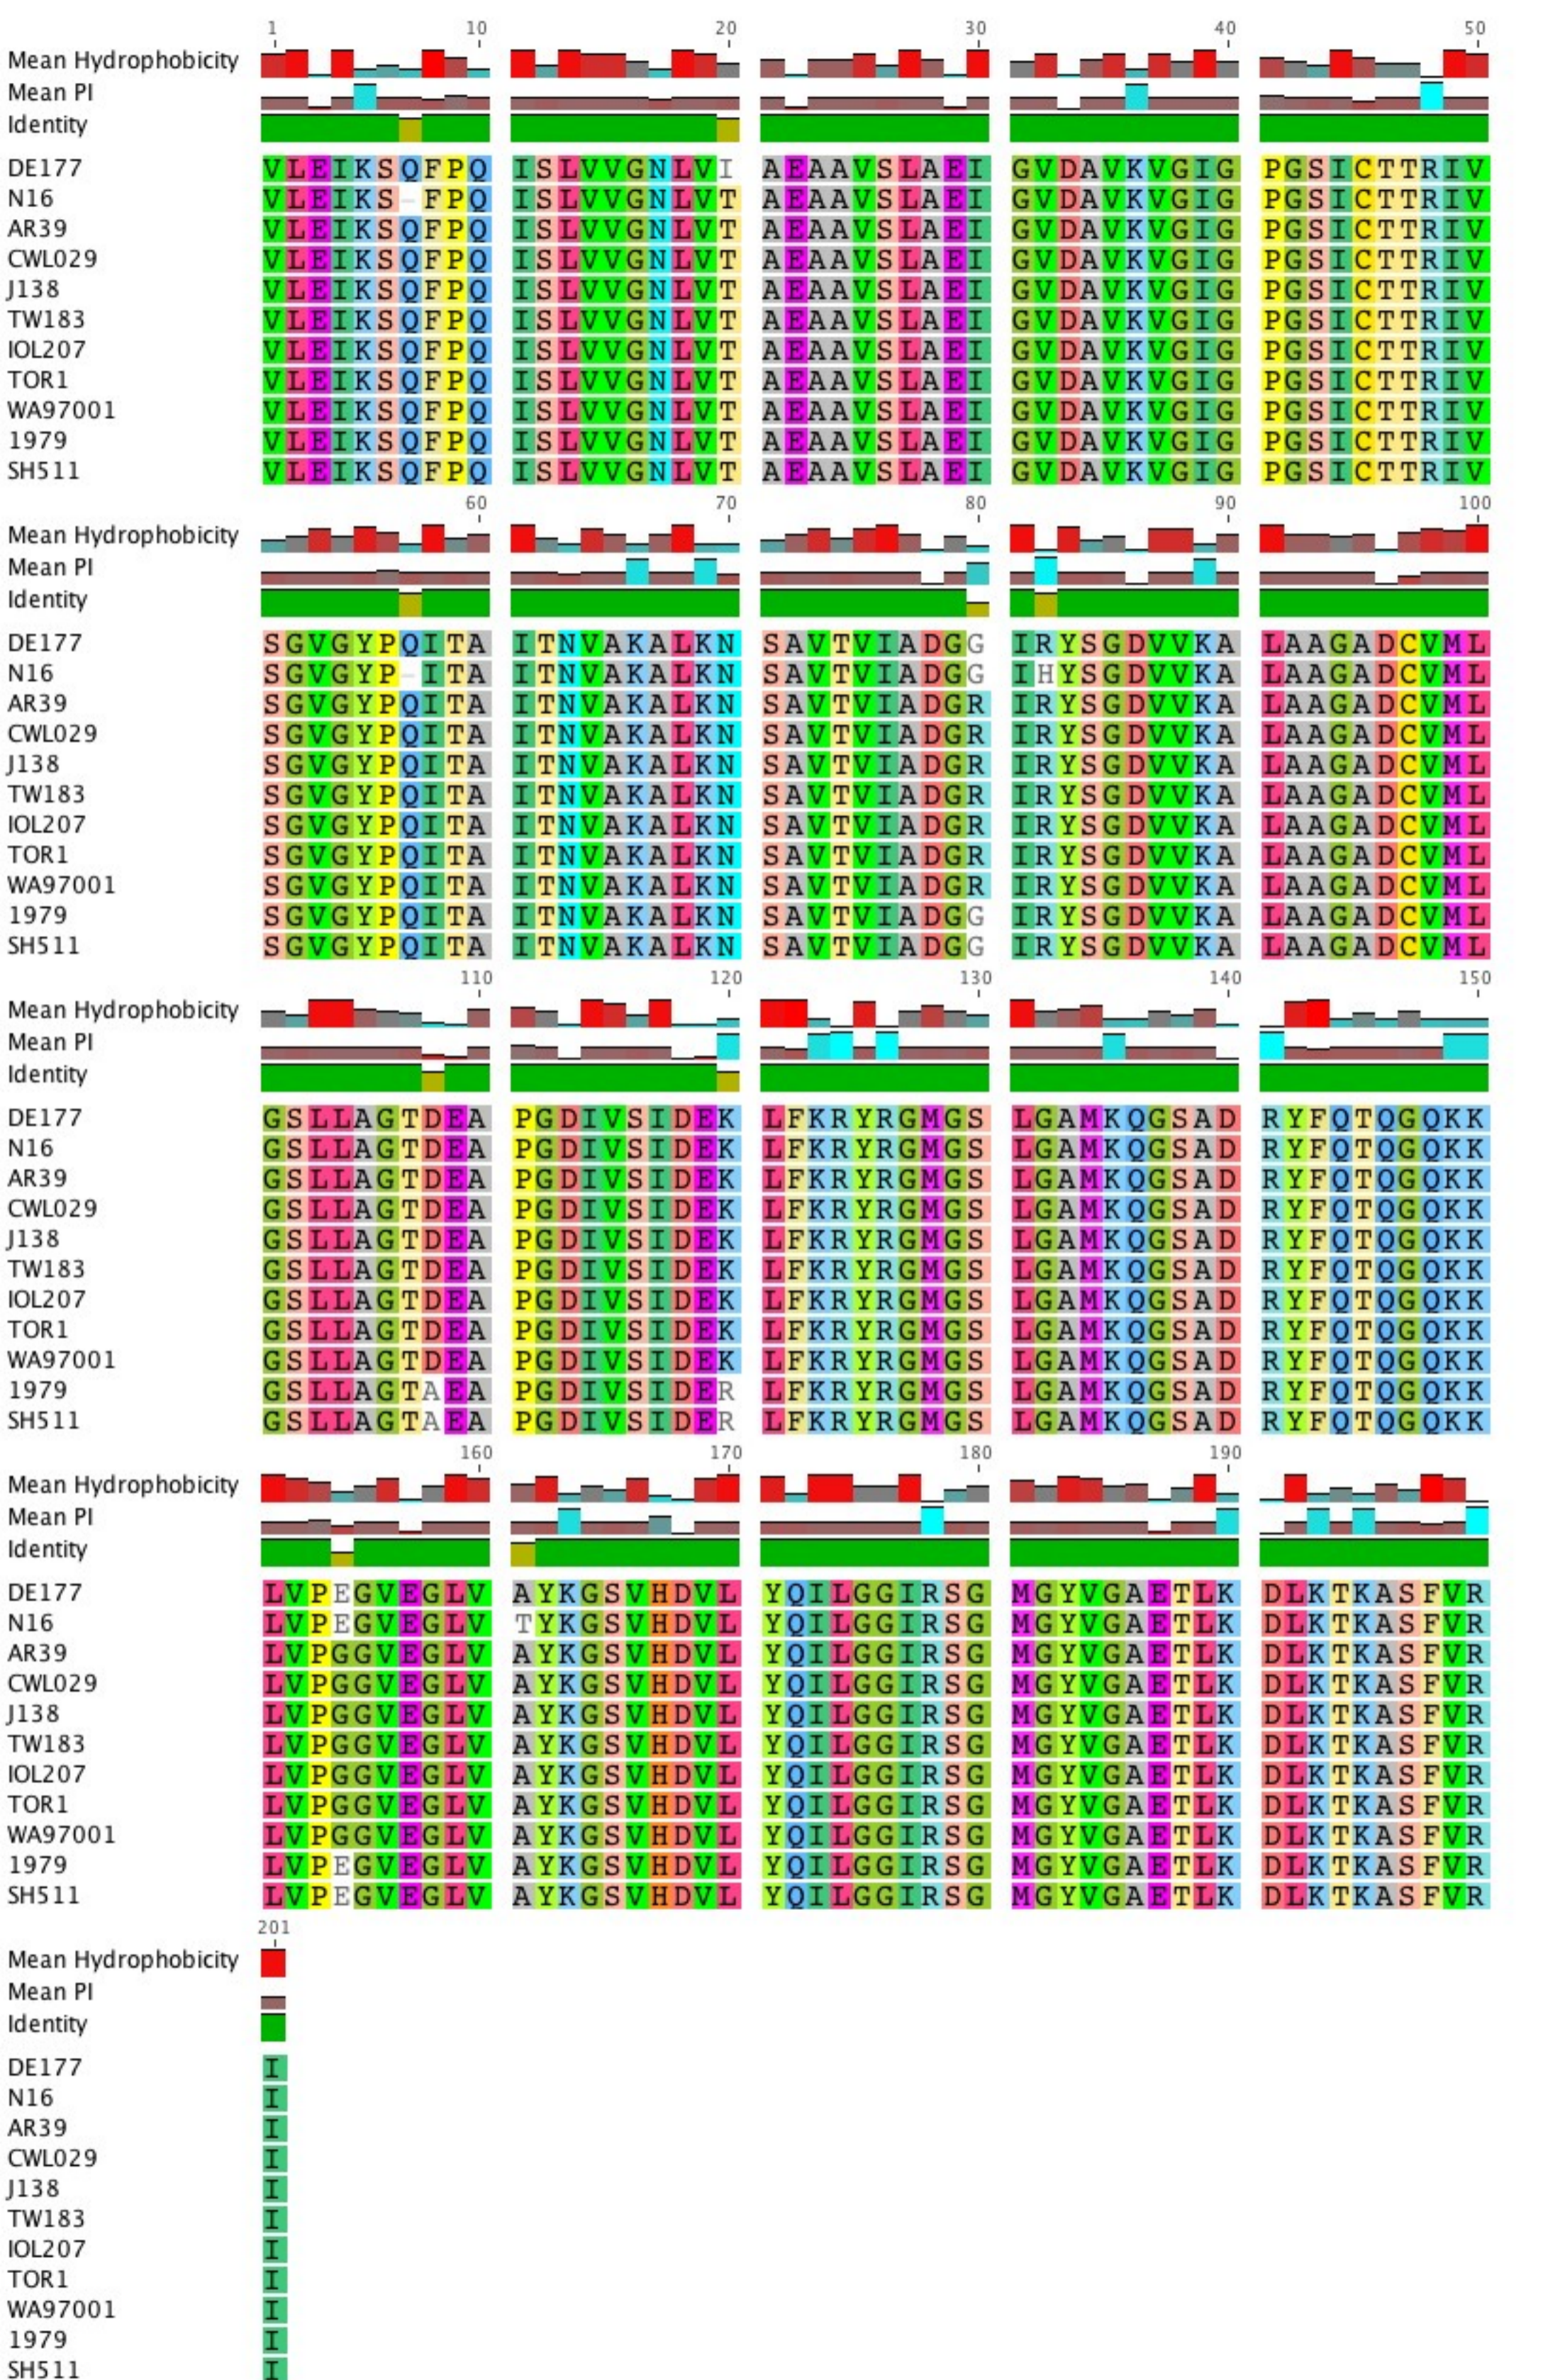

Supplement: ppat.1000903.s017.pdf [file ppat.1000903.s017.pdf]
