# Supplementary material for: Chlamydia pneumoniae Is Genetically Diverse in Animals and Appears to Have Crossed the Host Barrier to Humans on (At Least) Two Occasions
Source: PubMed Central journal article supplement (PMC2873915; doi:10.1371/journal.ppat.1000903), 2010-05-20

|          |                                                                                 |    |    |    |    |                                                                                 |  |  |  |  |                                                                                  |  |  |  |  |                                                                                   |  |  |  |  |                                                                                   |  |  |  |  |
|----------|---------------------------------------------------------------------------------|----|----|----|----|---------------------------------------------------------------------------------|--|--|--|--|----------------------------------------------------------------------------------|--|--|--|--|-----------------------------------------------------------------------------------|--|--|--|--|-----------------------------------------------------------------------------------|--|--|--|--|
|          | 1                                                                               | 10 | 20 | 30 | 40 | 50                                                                              |  |  |  |  |                                                                                  |  |  |  |  |                                                                                   |  |  |  |  |                                                                                   |  |  |  |  |
| Identity |  |    |    |    |    |  |  |  |  |  |  |  |  |  |  |  |  |  |  |  |  |  |  |  |  |
| DE177    | ATA TACTTAT                                                                     |    |    |    |    | GTA TTAGCAA                                                                     |  |  |  |  | AGCAAGTGCG                                                                       |  |  |  |  | GAAGTTATTT                                                                        |  |  |  |  | GTATA TTGCG                                                                       |  |  |  |  |
| AR39     | ATA TACTTAT                                                                     |    |    |    |    | GTA TTAGCAA                                                                     |  |  |  |  | AGCAAGTGCG                                                                       |  |  |  |  | GAAGTTATTT                                                                        |  |  |  |  | GTATA TTGCG                                                                       |  |  |  |  |
| CWL029   | ATA TACTTAT                                                                     |    |    |    |    | GTA TTAGCAA                                                                     |  |  |  |  | AGCAAGTGCG                                                                       |  |  |  |  | GAAGTTATTT                                                                        |  |  |  |  | GTATA TTGCG                                                                       |  |  |  |  |
| J138     | ATA TACTTAT                                                                     |    |    |    |    | GTA TTAGCAA                                                                     |  |  |  |  | AGCAAGTGCG                                                                       |  |  |  |  | GAAGTTATTT                                                                        |  |  |  |  | GTATA TTGCG                                                                       |  |  |  |  |
| TW183    | ATA TACTTAT                                                                     |    |    |    |    | GTA TTAGCAA                                                                     |  |  |  |  | AGCAAGTGCG                                                                       |  |  |  |  | GAAGTTATTT                                                                        |  |  |  |  | GTATA TTGCG                                                                       |  |  |  |  |
| TOR1     | ATA TACTTAT                                                                     |    |    |    |    | GTA TTAGCAA                                                                     |  |  |  |  | AGCAAGTGCG                                                                       |  |  |  |  | GAAGTTATTT                                                                        |  |  |  |  | GTATA TTGCG                                                                       |  |  |  |  |
| WA97001  | ATA TACTTAT                                                                     |    |    |    |    | GTA TTAGCAA                                                                     |  |  |  |  | AGCAAGTGCG                                                                       |  |  |  |  | GAAGTTATTT                                                                        |  |  |  |  | GTATA TTGCG                                                                       |  |  |  |  |

|          |                                                                                   |    |    |    |     |                                                                                   |  |  |  |  |                                                                                    |  |  |  |  |                                                                                     |  |  |  |  |                                                                                     |  |  |  |  |
|----------|-----------------------------------------------------------------------------------|----|----|----|-----|-----------------------------------------------------------------------------------|--|--|--|--|------------------------------------------------------------------------------------|--|--|--|--|-------------------------------------------------------------------------------------|--|--|--|--|-------------------------------------------------------------------------------------|--|--|--|--|
|          | 60                                                                                | 70 | 80 | 90 | 100 |                                                                                   |  |  |  |  |                                                                                    |  |  |  |  |                                                                                     |  |  |  |  |                                                                                     |  |  |  |  |
| Identity |  |    |    |    |     |  |  |  |  |  |  |  |  |  |  |  |  |  |  |  |  |  |  |  |  |
| DE177    | AAG TTC TTCC                                                                      |    |    |    |     | CTGGAA TATC                                                                       |  |  |  |  | TCTG TGCAAT                                                                        |  |  |  |  | GTTTAAAAGA                                                                          |  |  |  |  | AAGAG CGCCT                                                                         |  |  |  |  |
| AR39     | AAG TTC TTCC                                                                      |    |    |    |     | CTGGAA TATC                                                                       |  |  |  |  | TCTG TGCAAT                                                                        |  |  |  |  | GTTTAAAAGA                                                                          |  |  |  |  | AAGAG CGCCT                                                                         |  |  |  |  |
| CWL029   | AAG TTC TTCC                                                                      |    |    |    |     | CTGGAA TATC                                                                       |  |  |  |  | TCTG TGCAAT                                                                        |  |  |  |  | GTTTAAAAGA                                                                          |  |  |  |  | AAGAG CGCCT                                                                         |  |  |  |  |
| J138     | AAG TTC TTCC                                                                      |    |    |    |     | CTGGAA TATC                                                                       |  |  |  |  | TCTG TGCAAT                                                                        |  |  |  |  | GTTTAAAAGA                                                                          |  |  |  |  | AAGAG CGCCT                                                                         |  |  |  |  |
| TW183    | AAG TTC TTCC                                                                      |    |    |    |     | CTGGAA TATC                                                                       |  |  |  |  | TCTG TGCAAT                                                                        |  |  |  |  | GTTTAAAAGA                                                                          |  |  |  |  | AAGAG CGCCT                                                                         |  |  |  |  |
| TOR1     | AAG TTC TTCC                                                                      |    |    |    |     | CTGGAA TATC                                                                       |  |  |  |  | TCTG TGCAAT                                                                        |  |  |  |  | GTTTAAAAGA                                                                          |  |  |  |  | AAGAG CGCCT                                                                         |  |  |  |  |
| WA97001  | AAG TTC TTCC                                                                      |    |    |    |     | CTGGAA TATC                                                                       |  |  |  |  | TCTG TGCAAT                                                                        |  |  |  |  | GTTTAAAAGA                                                                          |  |  |  |  | AAGAG CGCCT                                                                         |  |  |  |  |

|          |                                                                                   |     |     |     |     |                                                                                   |  |  |  |  |                                                                                    |  |  |  |  |                                                                                     |  |  |  |  |                                                                                     |  |  |  |  |
|----------|-----------------------------------------------------------------------------------|-----|-----|-----|-----|-----------------------------------------------------------------------------------|--|--|--|--|------------------------------------------------------------------------------------|--|--|--|--|-------------------------------------------------------------------------------------|--|--|--|--|-------------------------------------------------------------------------------------|--|--|--|--|
|          | 110                                                                               | 120 | 130 | 140 | 150 |                                                                                   |  |  |  |  |                                                                                    |  |  |  |  |                                                                                     |  |  |  |  |                                                                                     |  |  |  |  |
| Identity |  |     |     |     |     |  |  |  |  |  |  |  |  |  |  |  |  |  |  |  |  |  |  |  |  |
| DE177    | TTGGGGATCA                                                                        |     |     |     |     | TTC TCTCAGG                                                                       |  |  |  |  | AGGTCCTCAC                                                                         |  |  |  |  | TCTG TCTATG                                                                         |  |  |  |  | AAAACAAGGC                                                                          |  |  |  |  |
| AR39     | TTGGGGATCA                                                                        |     |     |     |     | TTC TCTCAGG                                                                       |  |  |  |  | AGGTCCTCAC                                                                         |  |  |  |  | TCTG TCTATG                                                                         |  |  |  |  | AAAACAAGGC                                                                          |  |  |  |  |
| CWL029   | TTGGGGATCA                                                                        |     |     |     |     | TTC TCTCAGG                                                                       |  |  |  |  | AGGTCCTCAC                                                                         |  |  |  |  | TCTG TCTATG                                                                         |  |  |  |  | AAAACAAGGC                                                                          |  |  |  |  |
| J138     | TTGGGGATCA                                                                        |     |     |     |     | TTC TCTCAGG                                                                       |  |  |  |  | AGGTCCTCAC                                                                         |  |  |  |  | TCTG TCTATG                                                                         |  |  |  |  | AAAACAAGGC                                                                          |  |  |  |  |
| TW183    | TTGGGGATCA                                                                        |     |     |     |     | TTC TCTCAGG                                                                       |  |  |  |  | AGGTCCTCAC                                                                         |  |  |  |  | TCTG TCTATG                                                                         |  |  |  |  | AAAACAAGGC                                                                          |  |  |  |  |
| TOR1     | TTGGGGATCA                                                                        |     |     |     |     | TTC TCTCAGG                                                                       |  |  |  |  | AGGTCCTCAC                                                                         |  |  |  |  | TCTG TCTATG                                                                         |  |  |  |  | AAAACAAGGC                                                                          |  |  |  |  |
| WA97001  | TTGGGGATCA                                                                        |     |     |     |     | TTC TCTCAGG                                                                       |  |  |  |  | AGGTCCTCAC                                                                         |  |  |  |  | TCTG TCTATG                                                                         |  |  |  |  | AAAACAAGGC                                                                          |  |  |  |  |

|          |                                                                                     |     |     |     |     |                                                                                     |  |  |  |  |                                                                                      |  |  |  |  |                                                                                       |  |  |  |  |                                                                                       |  |  |  |  |
|----------|-------------------------------------------------------------------------------------|-----|-----|-----|-----|-------------------------------------------------------------------------------------|--|--|--|--|--------------------------------------------------------------------------------------|--|--|--|--|---------------------------------------------------------------------------------------|--|--|--|--|---------------------------------------------------------------------------------------|--|--|--|--|
|          | 160                                                                                 | 170 | 180 | 190 | 200 |                                                                                     |  |  |  |  |                                                                                      |  |  |  |  |                                                                                       |  |  |  |  |                                                                                       |  |  |  |  |
| Identity |  |     |     |     |     |  |  |  |  |  |  |  |  |  |  |  |  |  |  |  |  |  |  |  |  |
| DE177    | TCCACA TTTA                                                                         |     |     |     |     | GATCCTGAAA                                                                          |  |  |  |  | TCTA TAAACT                                                                          |  |  |  |  | TGGCATTCCA                                                                            |  |  |  |  | ATTCTAGCTA                                                                            |  |  |  |  |
| AR39     | TCCACA TTTA                                                                         |     |     |     |     | GATCCTGAAA                                                                          |  |  |  |  | TCTA TAAACT                                                                          |  |  |  |  | TGGCATTCCA                                                                            |  |  |  |  | ATTCTAGCTA                                                                            |  |  |  |  |
| CWL029   | TCCACA TTTA                                                                         |     |     |     |     | GATCCTGAAA                                                                          |  |  |  |  | TCTA TAAACT                                                                          |  |  |  |  | TGGCATTCCA                                                                            |  |  |  |  | ATTCTAGCTA                                                                            |  |  |  |  |
| J138     | TCCACA TTTA                                                                         |     |     |     |     | GATCCTGAAA                                                                          |  |  |  |  | TCTA TAAACT                                                                          |  |  |  |  | TGGCATTCCA                                                                            |  |  |  |  | ATTCTAGCTA                                                                            |  |  |  |  |
| TW183    | TCCACA TTTA                                                                         |     |     |     |     | GATCCTGAAA                                                                          |  |  |  |  | TCTA TAAACT                                                                          |  |  |  |  | TGGCATTCCA                                                                            |  |  |  |  | ATTCTAGCTA                                                                            |  |  |  |  |
| TOR1     | TCCACA TTTA                                                                         |     |     |     |     | GATCCTGAAA                                                                          |  |  |  |  | TCTA TAAACT                                                                          |  |  |  |  | TGGCATTCCA                                                                            |  |  |  |  | ATTCTAGCTA                                                                            |  |  |  |  |
| WA97001  | TCCACA TTTA                                                                         |     |     |     |     | GATCCTGAAA                                                                          |  |  |  |  | TCTA TAAACT                                                                          |  |  |  |  | TGGCATTCCA                                                                            |  |  |  |  | ATTCTAGCTA                                                                            |  |  |  |  |

|          | 210        | 220         | 230         | 240        | 250           |
|----------|------------|-------------|-------------|------------|---------------|
| Identity |            |             |             |            |               |
| DE177    | TTTGCTATGG | CATGCAGCTT  | ATGGCTAGAG  | ATTTTGGAGG | GACTGTAAGC    |
| AR39     | TTTGCTATGG | CATGCAGCTT  | ATGGCTAGAG  | ATTTTGGAGG | GACTGTAAGC    |
| CWL029   | TTTGCTATGG | CATGCAGCTT  | ATGGCTAGAG  | ATTTTGGAGG | GACTGTAAGC    |
| J138     | TTTGCTATGG | CATGCAGCTT  | ATGGCTAGAG  | ATTTTGGAGG | GACTGTAAGC    |
| TW183    | TTTGCTATGG | CATGCAGCTT  | ATGGCTAGAG  | ATTTTGGAGG | GACTGTAAGC    |
| TOR1     | TTTGCTATGG | CATGCAGCTT  | ATGGCTAGAG  | ATTTTGGAGG | GACTGTAAGC    |
| WA97001  | TTTGCTATGG | CATGCAGCTT  | ATGGCTAGAG  | ATTTTGGAGG | GACTGTAAGC    |
|          | 260        | 270         | 280         | 290        | 300           |
| Identity |            |             |             |            |               |
| DE177    | CCTGGTGTAG | GAGAAATTTGG | ATATACGCC   | ATCCATCTGT | ATCCTTGTGA    |
| AR39     | CCTGGTGTAG | GAGAAATTTGG | ATATACGCC   | ATCCATCTGT | ATCCTTGTGA    |
| CWL029   | CCTGGTGTAG | GAGAAATTTGG | ATATACGCC   | ATCCATCTGT | ATCCTTGTGA    |
| J138     | CCTGGTGTAG | GAGAAATTTGG | ATATACGCC   | ATCCATCTGT | ATCCTTGTGA    |
| TW183    | CCTGGTGTAG | GAGAAATTTGG | ATATACGCC   | ATCCATCTGT | ATCCTTGTGA    |
| TOR1     | CCTGGTGTAG | GAGAAATTTGG | ATATACGCC   | ATCCATCTGT | ATCCTTGTGA    |
| WA97001  | CCTGGTGTAG | GAGAAATTTGG | ATATACGCC   | ATCCATCTGT | ATCCTTGTGA    |
|          | 310        | 320         | 330         | 340        | 350           |
| Identity |            |             |             |            |               |
| DE177    | GCTCTTCAAA | CACATCGTCG  | ACTGCGAATC  | TCTAGACACA | GAGATTCGGA    |
| AR39     | GCTCTTCAAA | CACATCGTCG  | ACTGCGAATC  | TCTAGACACA | GAGATTCGGA    |
| CWL029   | GCTCTTCAAA | CACATCGTCG  | ACTGCGAATC  | TCTAGACACA | GAGATTCGGA    |
| J138     | GCTCTTCAAA | CACATCGTCG  | ACTGCGAATC  | TCTAGACACA | GAGATTCGGA    |
| TW183    | GCTCTTCAAA | CACATCGTCG  | ACTGCGAATC  | TCTAGACACA | GAGATTCGGA    |
| TOR1     | GCTCTTCAAA | CACATCGTCG  | ACTGCGAATC  | TCTAGACACA | GAGATTCGGA    |
| WA97001  | GCTCTTCAAA | CACATCGTCG  | ACTGCGAATC  | TCTAGACACA | GAGATTCGGA    |
|          | 360        | 370         | 380         | 390        | 400           |
| Identity |            |             |             |            |               |
| DE177    | TGAGCCATCG | GGATCATGTT  | ACGACAA TTC | CTGAAGGATT | TAA TG TAA TC |
| AR39     | TGAGCCATCG | GGATCATGTT  | ACGACAA TTC | CTGAAGGATT | TAA TG TAA TC |
| CWL029   | TGAGCCATCG | GGATCATGTT  | ACGACAA TTC | CTGAAGGATT | TAA TG TAA TC |
| J138     | TGAGCCATCG | GGATCATGTT  | ACGACAA TTC | CTGAAGGATT | TAA TG TAA TC |
| TW183    | TGAGCCATCG | GGATCATGTT  | ACGACAA TTC | CTGAAGGATT | TAA TG TAA TC |
| TOR1     | TGAGCCATCG | GGATCATGTT  | ACGACAA TTC | CTGAAGGATT | TAA TG TAA TC |
| WA97001  | TGAGCCATCG | GGATCATGTT  | ACGACAA TTC | CTGAAGGATT | TAA TG TAA TC |

|          | 410                                                                             | 420                                                                             | 430                                                                              | 440                                                                               | 450                                                                               |
|----------|---------------------------------------------------------------------------------|---------------------------------------------------------------------------------|----------------------------------------------------------------------------------|-----------------------------------------------------------------------------------|-----------------------------------------------------------------------------------|
| Identity |  |  |  |  |  |
| DE177    | GCA TCCACCT                                                                     | CACAA TGCTC                                                                     | GATCTCAGGA                                                                       | ATAGAAAATA                                                                        | CCAAA CAA CG                                                                      |
| AR39     | GCA TCCACCT                                                                     | CACAA TGCTC                                                                     | GATCTCAGGA                                                                       | ATAGAAAATA                                                                        | CCAAA CAA CG                                                                      |
| CWL029   | GCA TCCACCT                                                                     | CACAA TGCTC                                                                     | GATCTCAGGA                                                                       | ATAGAAAATA                                                                        | CCAAA CAA CG                                                                      |
| J138     | GCA TCCACCT                                                                     | CACAA TGCTC                                                                     | GATCTCAGGA                                                                       | ATAGAAAATA                                                                        | CCAAA CAA CG                                                                      |
| TW183    | GCA TCCACCT                                                                     | CACAA TGCTC                                                                     | GATCTCAGGA                                                                       | ATAGAAAATA                                                                        | CCAAA CAA CG                                                                      |
| TOR1     | GCA TCCACCT                                                                     | CACAA TGCTC                                                                     | GATCTCAGGA                                                                       | ATAGAAAATA                                                                        | CCAAA CAA CG                                                                      |
| WA97001  | GCA TCCACCT                                                                     | CACAA TGCTC                                                                     | GATCTCAGGA                                                                       | ATAGAAAATA                                                                        | CCAAA CAA CG                                                                      |

|          | 460                                                                               | 470                                                                               | 480                                                                                | 490                                                                                 | 500                                                                                 |
|----------|-----------------------------------------------------------------------------------|-----------------------------------------------------------------------------------|------------------------------------------------------------------------------------|-------------------------------------------------------------------------------------|-------------------------------------------------------------------------------------|
| Identity |  |  |  |  |  |
| DE177    | GTTGTA CGGG                                                                       | CTG CAA TTTC                                                                      | ATCCCGAGGT                                                                         | TTCTGACTCC                                                                          | ACTCCAACGG                                                                          |
| AR39     | GTTGTA CGGG                                                                       | CTG CAA TTTC                                                                      | ATCCCGAGGT                                                                         | TTCTGACTCC                                                                          | ACTCCAACGG                                                                          |
| CWL029   | GTTGTA CGGG                                                                       | CTG CAA TTTC                                                                      | ATCCCGAGGT                                                                         | TTCTGACTCC                                                                          | ACTCCAACGG                                                                          |
| J138     | GTTGTA CGGG                                                                       | CTG CAA TTTC                                                                      | ATCCCGAGGT                                                                         | TTCTGACTCC                                                                          | ACTCCAACGG                                                                          |
| TW183    | GTTGTA CGGG                                                                       | CTG CAA TTTC                                                                      | ATCCCGAGGT                                                                         | TTCTGACTCC                                                                          | ACTCCAACGG                                                                          |
| TOR1     | GTTGTA CGGG                                                                       | CTG CAA TTTC                                                                      | ATCCCGAGGT                                                                         | TTCTGACTCC                                                                          | ACTCCAACGG                                                                          |
| WA97001  | GTTGTA CGGG                                                                       | CTG CAA TTTC                                                                      | ATCCCGAGGT                                                                         | TTCTGACTCC                                                                          | ACTCCAACGG                                                                          |

|          | 510                                                                               | 520                                                                               | 530                                                                                | 540                                                                                 | 550                                                                                 |
|----------|-----------------------------------------------------------------------------------|-----------------------------------------------------------------------------------|------------------------------------------------------------------------------------|-------------------------------------------------------------------------------------|-------------------------------------------------------------------------------------|
| Identity |  |  |  |  |  |
| DE177    | GAAATAAGAT                                                                        | TCTAGAAACT                                                                        | TTTGTTCAAG                                                                         | AGATCTG TTC                                                                         | TGCTCCACA                                                                           |
| AR39     | GAAATAAGAT                                                                        | TCTAGAAACT                                                                        | TTTGTTCAAG                                                                         | AGATCTG TTC                                                                         | TGCTCCACA                                                                           |
| CWL029   | GAAATAAGAT                                                                        | TCTAGAAACT                                                                        | TTTGTTCAAG                                                                         | AGATCTG TTC                                                                         | TGCTCCACA                                                                           |
| J138     | GAAATAAGAT                                                                        | TCTAGAAACT                                                                        | TTTGTTCAAG                                                                         | AGATCTG TTC                                                                         | TGCTCCACA                                                                           |
| TW183    | GAAATAAGAT                                                                        | TCTAGAAACT                                                                        | TTTGTTCAAG                                                                         | AGATCTG TTC                                                                         | TGCTCCACA                                                                           |
| TOR1     | GAAATAAGAT                                                                        | TCTAGAAACT                                                                        | TTTGTTCAAG                                                                         | AGATCTG TTC                                                                         | TGCTCCACA                                                                           |
| WA97001  | GAAATAAGAT                                                                        | TCTAGAAACT                                                                        | TTTGTTCAAG                                                                         | AGATCTG TTC                                                                         | TGCTCCACA                                                                           |

|          | 560                                                                                 | 570                                                                                 | 580                                                                                  | 590                                                                                   | 600                                                                                   |
|----------|-------------------------------------------------------------------------------------|-------------------------------------------------------------------------------------|--------------------------------------------------------------------------------------|---------------------------------------------------------------------------------------|---------------------------------------------------------------------------------------|
| Identity |  |  |  |  |  |
| DE177    | CTA TGGAA TC                                                                        | CCTTG TATA T                                                                        | TCAG CAAG AC                                                                         | CTTG TAAG TA                                                                          | AAATT CAAGA                                                                           |
| AR39     | CTA TGGAA TC                                                                        | CCTTG TATA T                                                                        | TCAG CAAG AC                                                                         | CTTG TAAG TA                                                                          | AAATT CAAGA                                                                           |
| CWL029   | CTA TGGAA TC                                                                        | CCTTG TATA T                                                                        | TCAG CAAG AC                                                                         | CTTG TAAG TA                                                                          | AAATT CAAGA                                                                           |
| J138     | CTA TGGAA TC                                                                        | CCTTG TATA T                                                                        | TCAG CAAG AC                                                                         | CTTG TAAG TA                                                                          | AAATT CAAGA                                                                           |
| TW183    | CTA TGGAA TC                                                                        | CCTTG TATA T                                                                        | TCAG CAAG AC                                                                         | CTTG TAAG TA                                                                          | AAATT CAAGA                                                                           |
| TOR1     | CTA TGGAA TC                                                                        | CCTTG TATA T                                                                        | TCAG CAAG AC                                                                         | CTTG TAAG TA                                                                          | AAATT CAAGA                                                                           |
| WA97001  | CTA TGGAA TC                                                                        | CCTTG TATA T                                                                        | TCAG CAAG AC                                                                         | CTTG TAAG TA                                                                          | AAATT CAAGA                                                                           |

|          | 610                                                                               | 620        | 630        | 640         |            |
|----------|-----------------------------------------------------------------------------------|------------|------------|-------------|------------|
| Identity |  |            |            |             |            |
| DE177    | TACCGTTATT                                                                        | GAAGTATTTG | ATGAAGTCGC | TCAGTCA TTA | GACGTACAAT |
| AR39     | TACCGTTATT                                                                        | GAAGTATTTG | ATGAAGTCGC | TCAGTCA TTA | GACGTACAAT |
| CWL029   | TACCGTTATT                                                                        | GAAGTATTTG | ATGAAGTCGC | TCAGTCA TTA | GACGTACAAT |
| J138     | TACCGTTATT                                                                        | GAAGTATTTG | ATGAAGTCGC | TCAGTCA TTA | GACGTACAAT |
| TW183    | TACCGTTATT                                                                        | GAAGTATTTG | ATGAAGTCGC | TCAGTCA TTA | GACGTACAAT |
| TOR1     | TACCGTTATT                                                                        | GAAGTATTTG | ATGAAGTCGC | TCAGTCA TTA | GACGTACAAT |
| WA97001  | TACCGTTATT                                                                        | GAAGTATTTG | ATGAAGTCGC | TCAGTCA TTA | GACGTACAAT |

|          | 659                                                                               |
|----------|-----------------------------------------------------------------------------------|
| Identity |  |
| DE177    | GGTTAGCTC                                                                         |
| AR39     | GGTTAGCTC                                                                         |
| CWL029   | GGTTAGCTC                                                                         |
| J138     | GGTTAGCTC                                                                         |
| TW183    | GGTTAGCTC                                                                         |
| TOR1     | GGTTAGCTC                                                                         |
| WA97001  | GGTTAGCTC                                                                         |

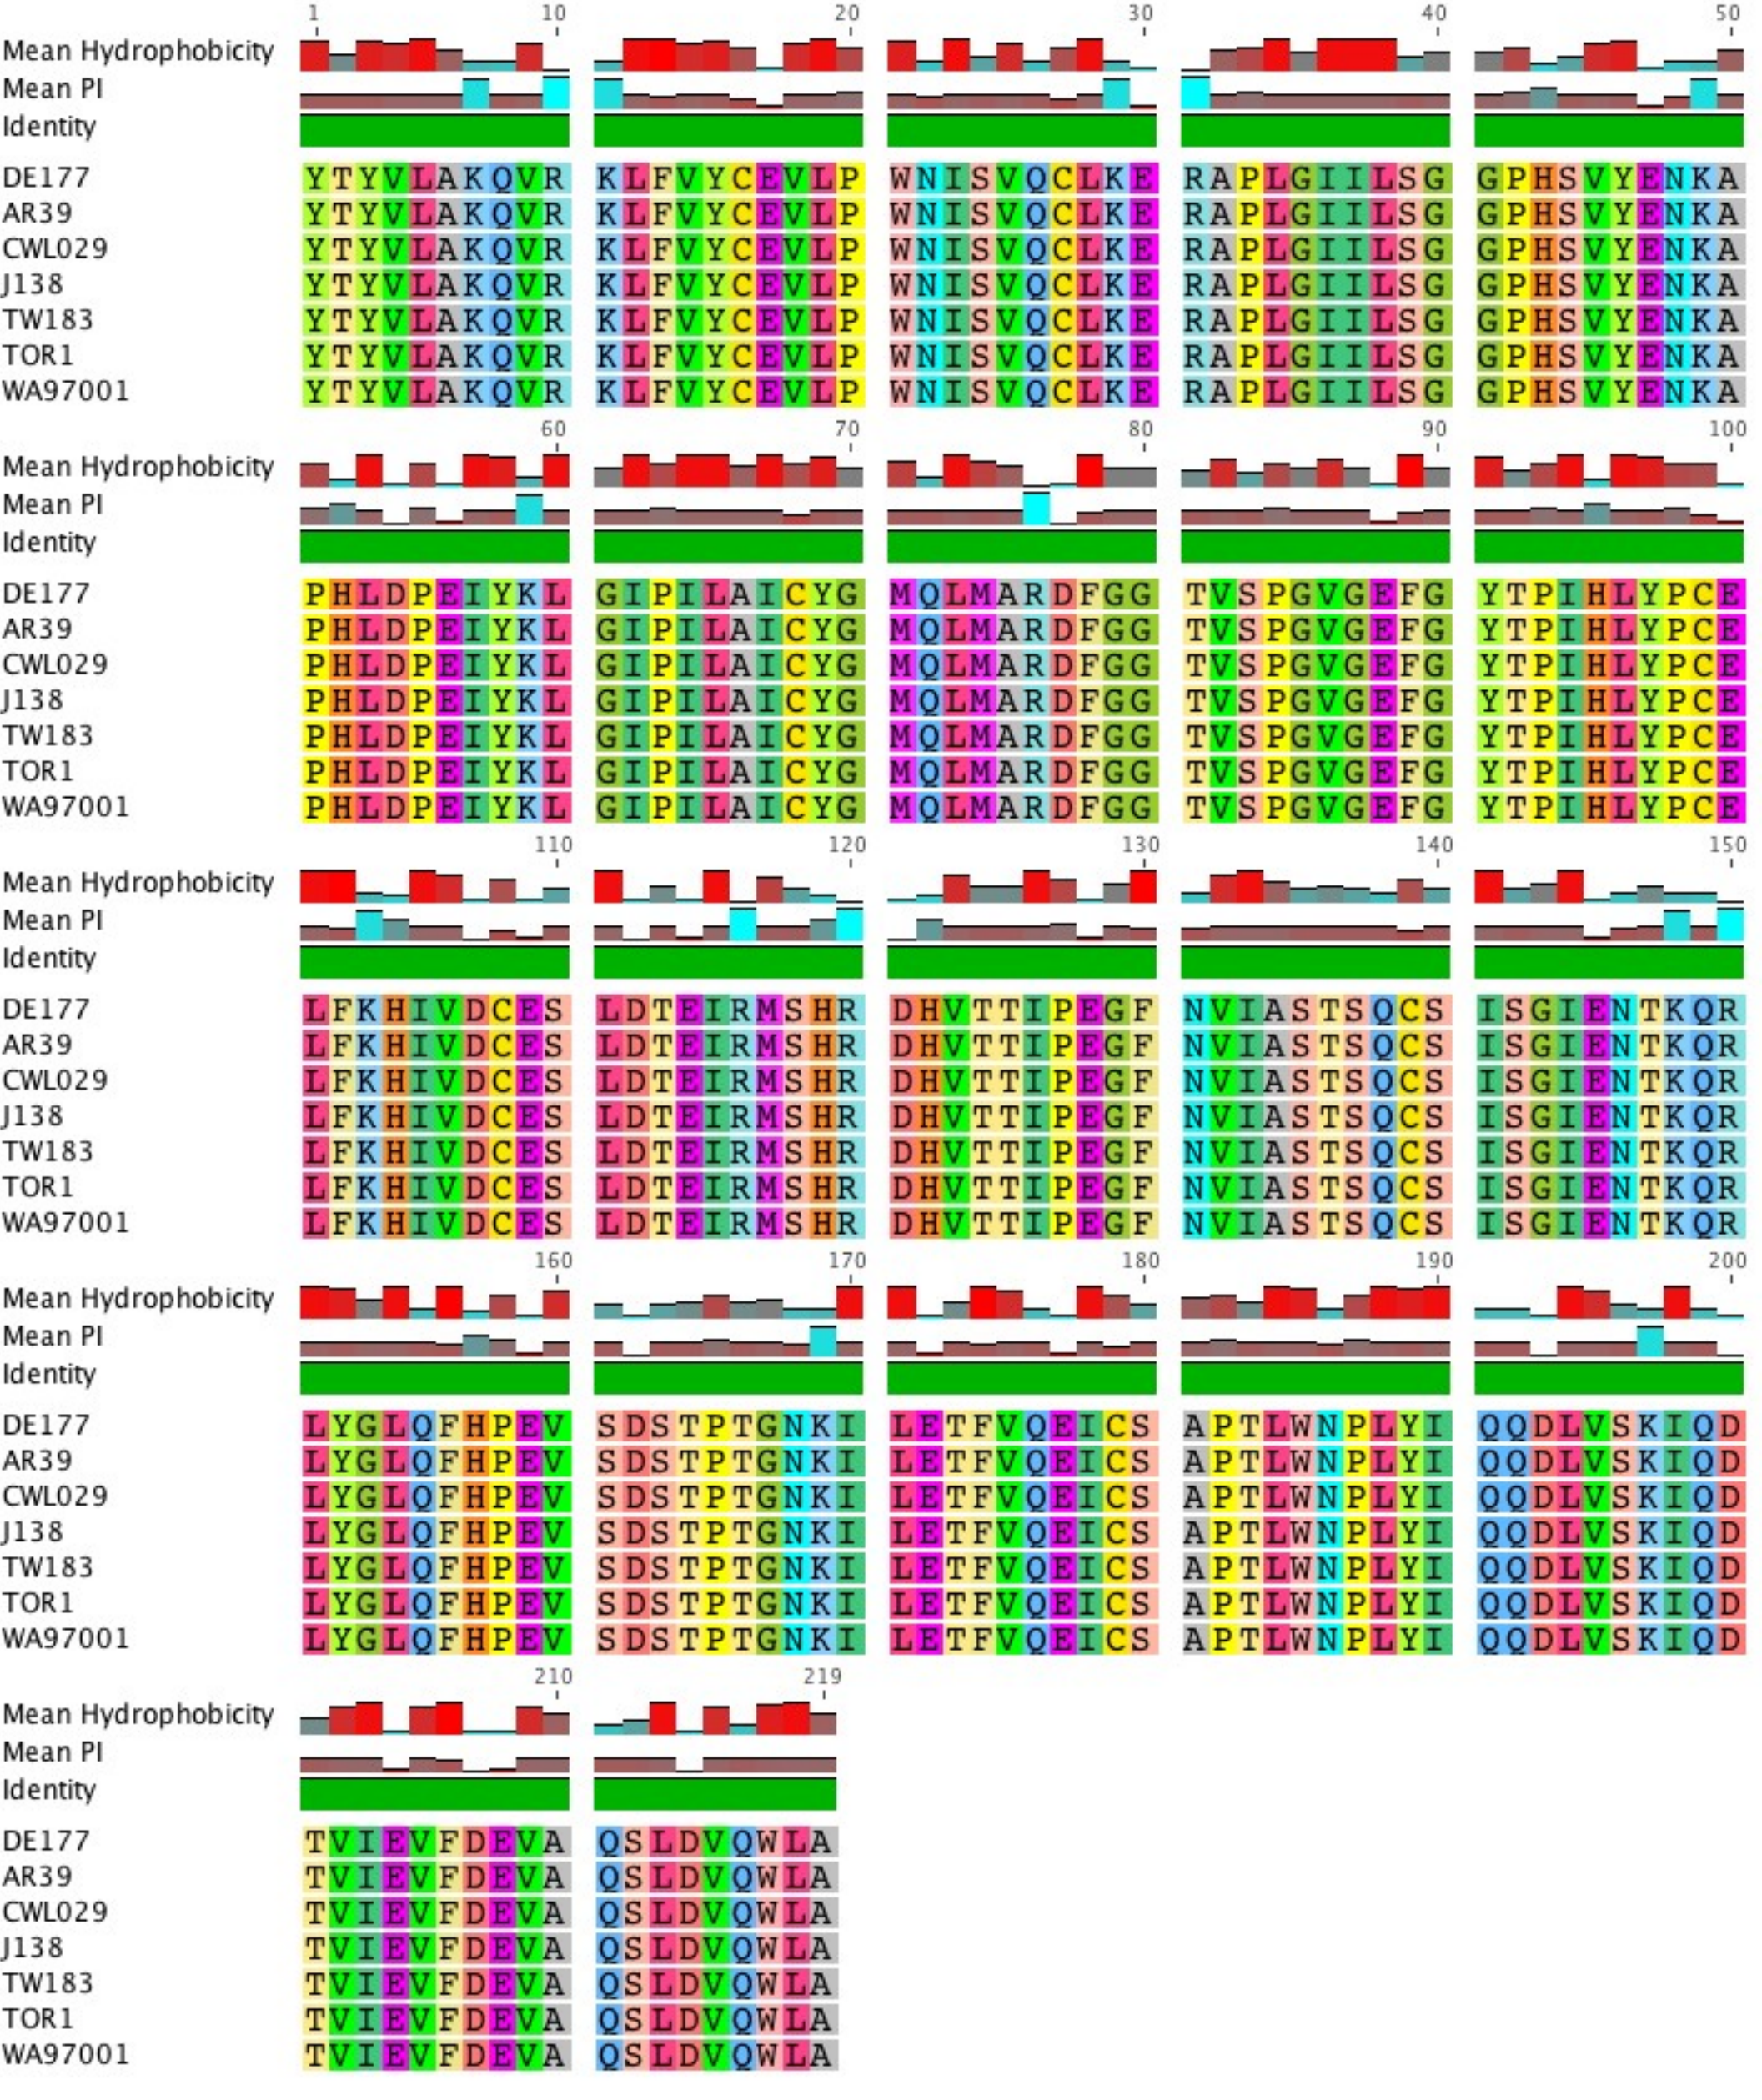

Supplement: ppat.1000903.s018.pdf [file ppat.1000903.s018.pdf]
