# Supplementary material for: Chlamydia pneumoniae Is Genetically Diverse in Animals and Appears to Have Crossed the Host Barrier to Humans on (At Least) Two Occasions
Source: PubMed Central journal article supplement (PMC2873915; doi:10.1371/journal.ppat.1000903), 2010-05-20

|          |                                                                                      |            |             |            |            |            |    |
|----------|--------------------------------------------------------------------------------------|------------|-------------|------------|------------|------------|----|
|          | 1                                                                                    | 10         | 20          | 30         | 40         | 50         | 60 |
| Identity |     |            |             |            |            |            |    |
| AR39     | TGAGATCTTT                                                                           | GCATTAGTAC | CACGACTCAA  | TACAATCGCT | TGCACCGAAG | CTATCATCAA |    |
| CWL029   | TGAGATCTTT                                                                           | GCATTAGTAC | CACGACTCAA  | TACAATCGCT | TGCACCGAAG | CTATCATCAA |    |
| J138     | TGAGATCTTT                                                                           | GCATTAGTAC | CACGACTCAA  | TACAATCGCT | TGCACCGAAG | CTATCATCAA |    |
| TW183    | TGAGATCTTT                                                                           | GCATTAGTAC | CACGACTCAA  | TACAATCGCT | TGCACCGAAG | CTATCATCAA |    |
| TOR1     | TGAGATCTTT                                                                           | GCATTAGTAC | CACGACTCAA  | TACAATCGCT | TGCACCGAAG | CTATCATCAA |    |
| WA97001  | TGAGATCTTT                                                                           | GCATTAGTAC | CACGACTCAA  | TACAATCGCT | TGCACCGAAG | CTATCATCAA |    |
|          | 70                                                                                   | 80         | 90          | 100        | 110        | 120        |    |
| Identity |    |            |             |            |            |            |    |
| AR39     | AAACCTCCCC                                                                           | AAAGCAGATA | TCCATGTACA  | CCTTCCTGGG | ACCATAACAC | CTCAATTAGC |    |
| CWL029   | AAACCTCCCC                                                                           | AAAGCAGATA | TCCATGTACA  | CCTTCCTGGG | ACCATAACAC | CTCAATTAGC |    |
| J138     | AAACCTCCCC                                                                           | AAAGCAGATA | TCCATGTACA  | CCTTCCTGGG | ACCATAACAC | CTCAATTAGC |    |
| TW183    | AAACCTCCCC                                                                           | AAAGCAGATA | TCCATGTACA  | CCTTCCTGGG | ACCATAACAC | CTCAATTAGC |    |
| TOR1     | AAACCTCCCC                                                                           | AAAGCAGATA | TCCATGTACA  | CCTTCCTGGG | ACCATAACAC | CTCAATTAGC |    |
| WA97001  | AAACCTCCCC                                                                           | AAAGCAGATA | TCCATGTACA  | CCTTCCTGGG | ACCATAACAC | CTCAATTAGC |    |
|          | 130                                                                                  | 140        | 150         | 160        | 170        | 180        |    |
| Identity |  |            |             |            |            |            |    |
| AR39     | TTGGATTTTA                                                                           | GGTGTGAAAA | ATGGGTTCCTT | AAAATGGTCT | TATAATTCTT | GGACCAATCA |    |
| CWL029   | TTGGATTTTA                                                                           | GGTGTGAAAA | ATGGGTTCCTT | AAAATGGTCT | TATAATTCTT | GGACCAATCA |    |
| J138     | TTGGATTTTA                                                                           | GGTGTGAAAA | ATGGGTTCCTT | AAAATGGTCT | TATAATTCTT | GGACCAATCA |    |
| TW183    | TTGGATTTTA                                                                           | GGTGTGAAAA | ATGGGTTCCTT | AAAATGGTCT | TATAATTCTT | GGACCAATCA |    |
| TOR1     | TTGGATTTTA                                                                           | GGTGTGAAAA | ATGGGTTCCTT | AAAATGGTCT | TATAATTCTT | GGACCAATCA |    |
| WA97001  | TTGGATTTTA                                                                           | GGTGTGAAAA | ATGGGTTCCTT | AAAATGGTCT | TATAATTCTT | GGACCAATCA |    |
|          | 190                                                                                  | 200        | 210         | 220        | 230        | 240        |    |
| Identity |  |            |             |            |            |            |    |
| AR39     | TCGATTACTT                                                                           | TCTCCTAAGA | ATCCTCATAA  | ACAATACTCC | AATATTTTCC | GAAACTTTCA |    |
| CWL029   | TCGATTACTT                                                                           | TCTCCTAAGA | ATCCTCATAA  | ACAATACTCC | AATATTTTCC | GAAACTTTCA |    |
| J138     | TCGATTACTT                                                                           | TCTCCTAAGA | ATCCTCATAA  | ACAATACTCC | AATATTTTCC | GAAACTTTCA |    |
| TW183    | TCGATTACTT                                                                           | TCTCCTAAGA | ATCCTCATAA  | ACAATACTCC | AATATTTTCC | GAAACTTTCA |    |
| TOR1     | TCGATTACTT                                                                           | TCTCCTAAGA | ATCCTCATAA  | ACAATACTCC | AATATTTTCC | GAAACTTTCA |    |
| WA97001  | TCGATTACTT                                                                           | TCTCCTAAGA | ATCCTCATAA  | ACAATACTCC | AATATTTTCC | GAAACTTTCA |    |

|          |                                                                                   |            |            |            |            |            |
|----------|-----------------------------------------------------------------------------------|------------|------------|------------|------------|------------|
|          | 250                                                                               | 260        | 270        | 280        | 290        | 300        |
| Identity |  |            |            |            |            |            |
| AR39     | AGATATCTGT                                                                        | CACGAAAAGG | ATCCGGATTT | AAGTGTATTA | CAATATAATA | TCTTAAATTA |
| CWL029   | AGATATCTGT                                                                        | CACGAAAAGG | ATCCGGATTT | AAGTGTATTA | CAATATAATA | TCTTAAATTA |
| J138     | AGATATCTGT                                                                        | CACGAAAAGG | ATCCGGATTT | AAGTGTATTA | CAATATAATA | TCTTAAATTA |
| TW183    | AGATATCTGT                                                                        | CACGAAAAGG | ATCCGGATTT | AAGTGTATTA | CAATATAATA | TCTTAAATTA |
| TOR1     | AGATATCTGT                                                                        | CACGAAAAGG | ATCCGGATTT | AAGTGTATTA | CAATATAATA | TCTTAAATTA |
| WA97001  | AGATATCTGT                                                                        | CACGAAAAGG | ATCCGGATTT | AAGTGTATTA | CAATATAATA | TCTTAAATTA |

|          |                                                                                    |            |            |            |            |            |
|----------|------------------------------------------------------------------------------------|------------|------------|------------|------------|------------|
|          | 310                                                                                | 320        | 330        | 340        | 350        | 360        |
| Identity |  |            |            |            |            |            |
| AR39     | CGATTTTAAT                                                                         | AGCTTTGATA | GAGTGATGGC | TACAGTACAA | GGACATCGCT | TTCCTCCTGG |
| CWL029   | CGATTTTAAT                                                                         | AGCTTTGATA | GAGTGATGGC | TACAGTACAA | GGACATCGCT | TTCCTCCTGG |
| J138     | CGATTTTAAT                                                                         | AGCTTTGATA | GAGTGATGGC | TACAGTACAA | GGACATCGCT | TTCCTCCTGG |
| TW183    | CGATTTTAAT                                                                         | AGCTTTGATA | GAGTGATGGC | TACAGTACAA | GGACATCGCT | TTCCTCCTGG |
| TOR1     | CGATTTTAAT                                                                         | AGCTTTGATA | GAGTGATGGC | TACAGTACAA | GGACATCGCT | TTCCTCCTGG |
| WA97001  | CGATTTTAAT                                                                         | AGCTTTGATA | GAGTGATGGC | TACAGTACAA | GGACATCGCT | TTCCTCCTGG |

|          |                                                                                      |            |            |            |            |            |
|----------|--------------------------------------------------------------------------------------|------------|------------|------------|------------|------------|
|          | 370                                                                                  | 380        | 390        | 400        | 410        | 420        |
| Identity |  |            |            |            |            |            |
| AR39     | AGGAATCCAA                                                                           | AATGAAGAAG | ACCTTCTTCT | CATTTTCAAT | AACTATCTCC | AGCAATGTCT |
| CWL029   | AGGAATCCAA                                                                           | AATGAAGAAG | ACCTTCTTCT | CATTTTCAAT | AACTATCTCC | AGCAATGTCT |
| J138     | AGGAATCCAA                                                                           | AATGAAGAAG | ACCTTCTTCT | CATTTTCAAT | AACTATCTCC | AGCAATGTCT |
| TW183    | AGGAATCCAA                                                                           | AATGAAGAAG | ACCTTCTTCT | CATTTTCAAT | AACTATCTCC | AGCAATGTCT |
| TOR1     | AGGAATCCAA                                                                           | AATGAAGAAG | ACCTTCTTCT | CATTTTCAAT | AACTATCTCC | AGCAATGTCT |
| WA97001  | AGGAATCCAA                                                                           | AATGAAGAAG | ACCTTCTTCT | CATTTTCAAT | AACTATCTCC | AGCAATGTCT |

|          |                                                                                      |            |            |            |            |            |
|----------|--------------------------------------------------------------------------------------|------------|------------|------------|------------|------------|
|          | 430                                                                                  | 440        | 450        | 460        | 470        | 480        |
| Identity |  |            |            |            |            |            |
| AR39     | GGACGATACT                                                                           | ATCGTGTATA | CTGAAGTACA | ACAAAATATC | CGCCTTGCCC | ATGTTTTGTA |
| CWL029   | GGACGATACT                                                                           | ATCGTGTATA | CTGAAGTACA | ACAAAATATC | CGCCTTGCCC | ATGTTTTGTA |
| J138     | GGACGATACT                                                                           | ATCGTGTATA | CTGAAGTACA | ACAAAATATC | CGCCTTGCCC | ATGTTTTGTA |
| TW183    | GGACGATACT                                                                           | ATCGTGTATA | CTGAAGTACA | ACAAAATATC | CGCCTTGCCC | ATGTTTTGTA |
| TOR1     | GGACGATACT                                                                           | ATCGTGTATA | CTGAAGTACA | ACAAAATATC | CGCCTTGCCC | ATGTTTTGTA |
| WA97001  | GGACGATACT                                                                           | ATCGTGTATA | CTGAAGTACA | ACAAAATATC | CGCCTTGCCC | ATGTTTTGTA |

|          | 490        | 500        | 510        | 520         | 530        | 540        |
|----------|------------|------------|------------|-------------|------------|------------|
| Identity |            |            |            |             |            |            |
| AR39     | TCCTTCATTA | CCTGAAAAGC | ACGCGCGTAT | GAAGTTTTTAT | CAAATCTTGT | ATCGTGCTTC |
| CWL029   | TCCTTCATTA | CCTGAAAAGC | ACGCGCGTAT | GAAGTTTTTAT | CAAATCTTGT | ATCGTGCTTC |
| J138     | TCCTTCATTA | CCTGAAAAGC | ACGCGCGTAT | GAAGTTTTTAT | CAAATCTTGT | ATCGTGCTTC |
| TW183    | TCCTTCATTA | CCTGAAAAGC | ACGCGCGTAT | GAAGTTTTTAT | CAAATCTTGT | ATCGTGCTTC |
| TOR1     | TCCTTCATTA | CCTGAAAAGC | ACGCGCGTAT | GAAGTTTTTAT | CAAATCTTGT | ATCGTGCTTC |
| WA97001  | TCCTTCATTA | CCTGAAAAGC | ACGCGCGTAT | GAAGTTTTTAT | CAAATCTTGT | ATCGTGCTTC |

|          | 550        | 560       | 570        | 580         | 590        | 600        |
|----------|------------|-----------|------------|-------------|------------|------------|
| Identity |            |           |            |             |            |            |
| AR39     | GCAAACGTTT | TCAAACACG | GGATTACTTT | ACGATTTTTTA | AACTGCTTCA | ATAAAACATT |
| CWL029   | GCAAACGTTT | TCAAACACG | GGATTACTTT | ACGATTTTTTA | AACTGCTTCA | ATAAAACATT |
| J138     | GCAAACGTTT | TCAAACACG | GGATTACTTT | ACGATTTTTTA | AACTGCTTCA | ATAAAACATT |
| TW183    | GCAAACGTTT | TCAAACACG | GGATTACTTT | ACGATTTTTTA | AACTGCTTCA | ATAAAACATT |
| TOR1     | GCAAACGTTT | TCAAACACG | GGATTACTTT | ACGATTTTTTA | AACTGCTTCA | ATAAAACATT |
| WA97001  | GCAAACGTTT | TCAAACACG | GGATTACTTT | ACGATTTTTTA | AACTGCTTCA | ATAAAACATT |

|          | 610        | 620        | 630        | 640        | 650        | 660        |
|----------|------------|------------|------------|------------|------------|------------|
| Identity |            |            |            |            |            |            |
| AR39     | TGCTCCACAA | ATAAACACAC | AAGAACCTGC | CCAAGAAGCT | GTTCAATGGC | TCCAAGAGGT |
| CWL029   | TGCTCCACAA | ATAAACACAC | AAGAACCTGC | CCAAGAAGCT | GTTCAATGGC | TCCAAGAGGT |
| J138     | TGCTCCACAA | ATAAACACAC | AAGAACCTGC | CCAAGAAGCT | GTTCAATGGC | TCCAAGAGGT |
| TW183    | TGCTCCACAA | ATAAACACAC | AAGAACCTGC | CCAAGAAGCT | GTTCAATGGC | TCCAAGAGGT |
| TOR1     | TGCTCCACAA | ATAAACACAC | AAGAACCTGC | CCAAGAAGCT | GTTCAATGGC | TCCAAGAGGT |
| WA97001  | TGCTCCACAA | ATAAACACAC | AAGAACCTGC | CCAAGAAGCT | GTTCAATGGC | TCCAAGAGGT |

|          | 670        | 680        | 690        | 700        | 710        | 720        |
|----------|------------|------------|------------|------------|------------|------------|
| Identity |            |            |            |            |            |            |
| AR39     | TGATTCTACA | TTTCCTGGTC | TATTTGTAGG | GATACAATCC | GCAGGATCAG | AATCTGCGCC |
| CWL029   | TGATTCTACA | TTTCCTGGTC | TATTTGTAGG | GATACAATCC | GCAGGATCAG | AATCTGCGCC |
| J138     | TGATTCTACA | TTTCCTGGTC | TATTTGTAGG | GATACAATCC | GCAGGATCAG | AATCTGCGCC |
| TW183    | TGATTCTACA | TTTCCTGGTC | TATTTGTAGG | GATACAATCC | GCAGGATCAG | AATCTGCGCC |
| TOR1     | TGATTCTACA | TTTCCTGGTC | TATTTGTAGG | GATACAATCC | GCAGGATCAG | AATCTGCGCC |
| WA97001  | TGATTCTACA | TTTCCTGGTC | TATTTGTAGG | GATACAATCC | GCAGGATCAG | AATCTGCGCC |

|          | 730                                                                              | 740                                                                               | 750                                                                                | 760                                                                                | 770                                                                                | 780                                                                                |
|----------|----------------------------------------------------------------------------------|-----------------------------------------------------------------------------------|------------------------------------------------------------------------------------|------------------------------------------------------------------------------------|------------------------------------------------------------------------------------|------------------------------------------------------------------------------------|
| Identity |  |  |  |  |  |  |
| AR39     | CGGAGCCTGT                                                                       | CCTAAGCGAT                                                                        | TAGCTTCTGG                                                                         | ATATAGAAAT                                                                         | GCTTATGACT                                                                         | CAGGGTTTGG                                                                         |
| CWL029   | CGGAGCCTGT                                                                       | CCTAAGCGAT                                                                        | TAGCTTCTGG                                                                         | ATATAGAAAT                                                                         | GCTTATGACT                                                                         | CAGGGTTTGG                                                                         |
| J138     | CGGAGCCTGT                                                                       | CCTAAGCGAT                                                                        | TAGCTTCTGG                                                                         | ATATAGAAAT                                                                         | GCTTATGACT                                                                         | CAGGGTTTGG                                                                         |
| TW183    | CGGAGCCTGT                                                                       | CCTAAGCGAT                                                                        | TAGCTTCTGG                                                                         | ATATAGAAAT                                                                         | GCTTATGACT                                                                         | CAGGGTTTGG                                                                         |
| TOR1     | CGGAGCCTGT                                                                       | CCTAAGCGAT                                                                        | TAGCTTCTGG                                                                         | ATATAGAAAT                                                                         | GCTTATGACT                                                                         | CAGGGTTTGG                                                                         |
| WA97001  | CGGAGCCTGT                                                                       | CCTAAGCGAT                                                                        | TAGCTTCTGG                                                                         | ATATAGAAAT                                                                         | GCTTATGACT                                                                         | CAGGGTTTGG                                                                         |

|          | 790                                                                               | 800                                                                                | 810                                                                                 | 820                                                                                 | 830                                                                                 | 840                                                                                 |
|----------|-----------------------------------------------------------------------------------|------------------------------------------------------------------------------------|-------------------------------------------------------------------------------------|-------------------------------------------------------------------------------------|-------------------------------------------------------------------------------------|-------------------------------------------------------------------------------------|
| Identity |  |  |  |  |  |  |
| AR39     | TTGTGAAGCT                                                                        | CATGCTGGAG                                                                         | AAGGCATAGA                                                                          | GACCCGGACT                                                                          | ATTTTTTTCGT                                                                         | CAGCTAAGGT                                                                          |
| CWL029   | TTGTGAAGCT                                                                        | CATGCTGGAG                                                                         | AAGGCATAGA                                                                          | GACCCGGACT                                                                          | ATTTTTTTCGT                                                                         | CAGCTAAGGT                                                                          |
| J138     | TTGTGAAGCT                                                                        | CATGCTGGAG                                                                         | AAGGCATAGA                                                                          | GACCCGGACT                                                                          | ATTTTTTTCGT                                                                         | CAGCTAAGGT                                                                          |
| TW183    | TTGTGAAGCT                                                                        | CATGCTGGAG                                                                         | AAGGCATAGA                                                                          | GACCCGGACT                                                                          | ATTTTTTTCGT                                                                         | CAGCTAAGGT                                                                          |
| TOR1     | TTGTGAAGCT                                                                        | CATGCTGGAG                                                                         | AAGGCATAGA                                                                          | GACCCGGACT                                                                          | ATTTTTTTCGT                                                                         | CAGCTAAGGT                                                                          |
| WA97001  | TTGTGAAGCT                                                                        | CATGCTGGAG                                                                         | AAGGCATAGA                                                                          | GACCCGGACT                                                                          | ATTTTTTTCGT                                                                         | CAGCTAAGGT                                                                          |

|          | 850                                                                                 | 860                                                                                  | 870                                                                                   | 880                                                                                   | 882                                                                                   |
|----------|-------------------------------------------------------------------------------------|--------------------------------------------------------------------------------------|---------------------------------------------------------------------------------------|---------------------------------------------------------------------------------------|---------------------------------------------------------------------------------------|
| Identity |  |  |  |  |  |
| AR39     | AAATCCAGAG                                                                          | GGATTGATCG                                                                           | AGATAACCCG                                                                            | AGTGACTTTC                                                                            | TC                                                                                    |
| CWL029   | AAATCCAGAG                                                                          | GGATTGATCG                                                                           | AGATAACCCG                                                                            | AGTGACTTTC                                                                            | TC                                                                                    |
| J138     | AAATCCAGAG                                                                          | GGATTGATCG                                                                           | AGATAACCCG                                                                            | AGTGACTTTC                                                                            | TC                                                                                    |
| TW183    | AAATCCAGAG                                                                          | GGATTGATCG                                                                           | AGATAACCCG                                                                            | AGTGACTTTC                                                                            | TC                                                                                    |
| TOR1     | AAATCCAGAG                                                                          | GGATTGATCG                                                                           | AGATAACCCG                                                                            | AGTGACTTTC                                                                            | TC                                                                                    |
| WA97001  | AAATCCAGAG                                                                          | GGATTGATCG                                                                           | AGATAACCCG                                                                            | AGTGACTTTC                                                                            | TC                                                                                    |

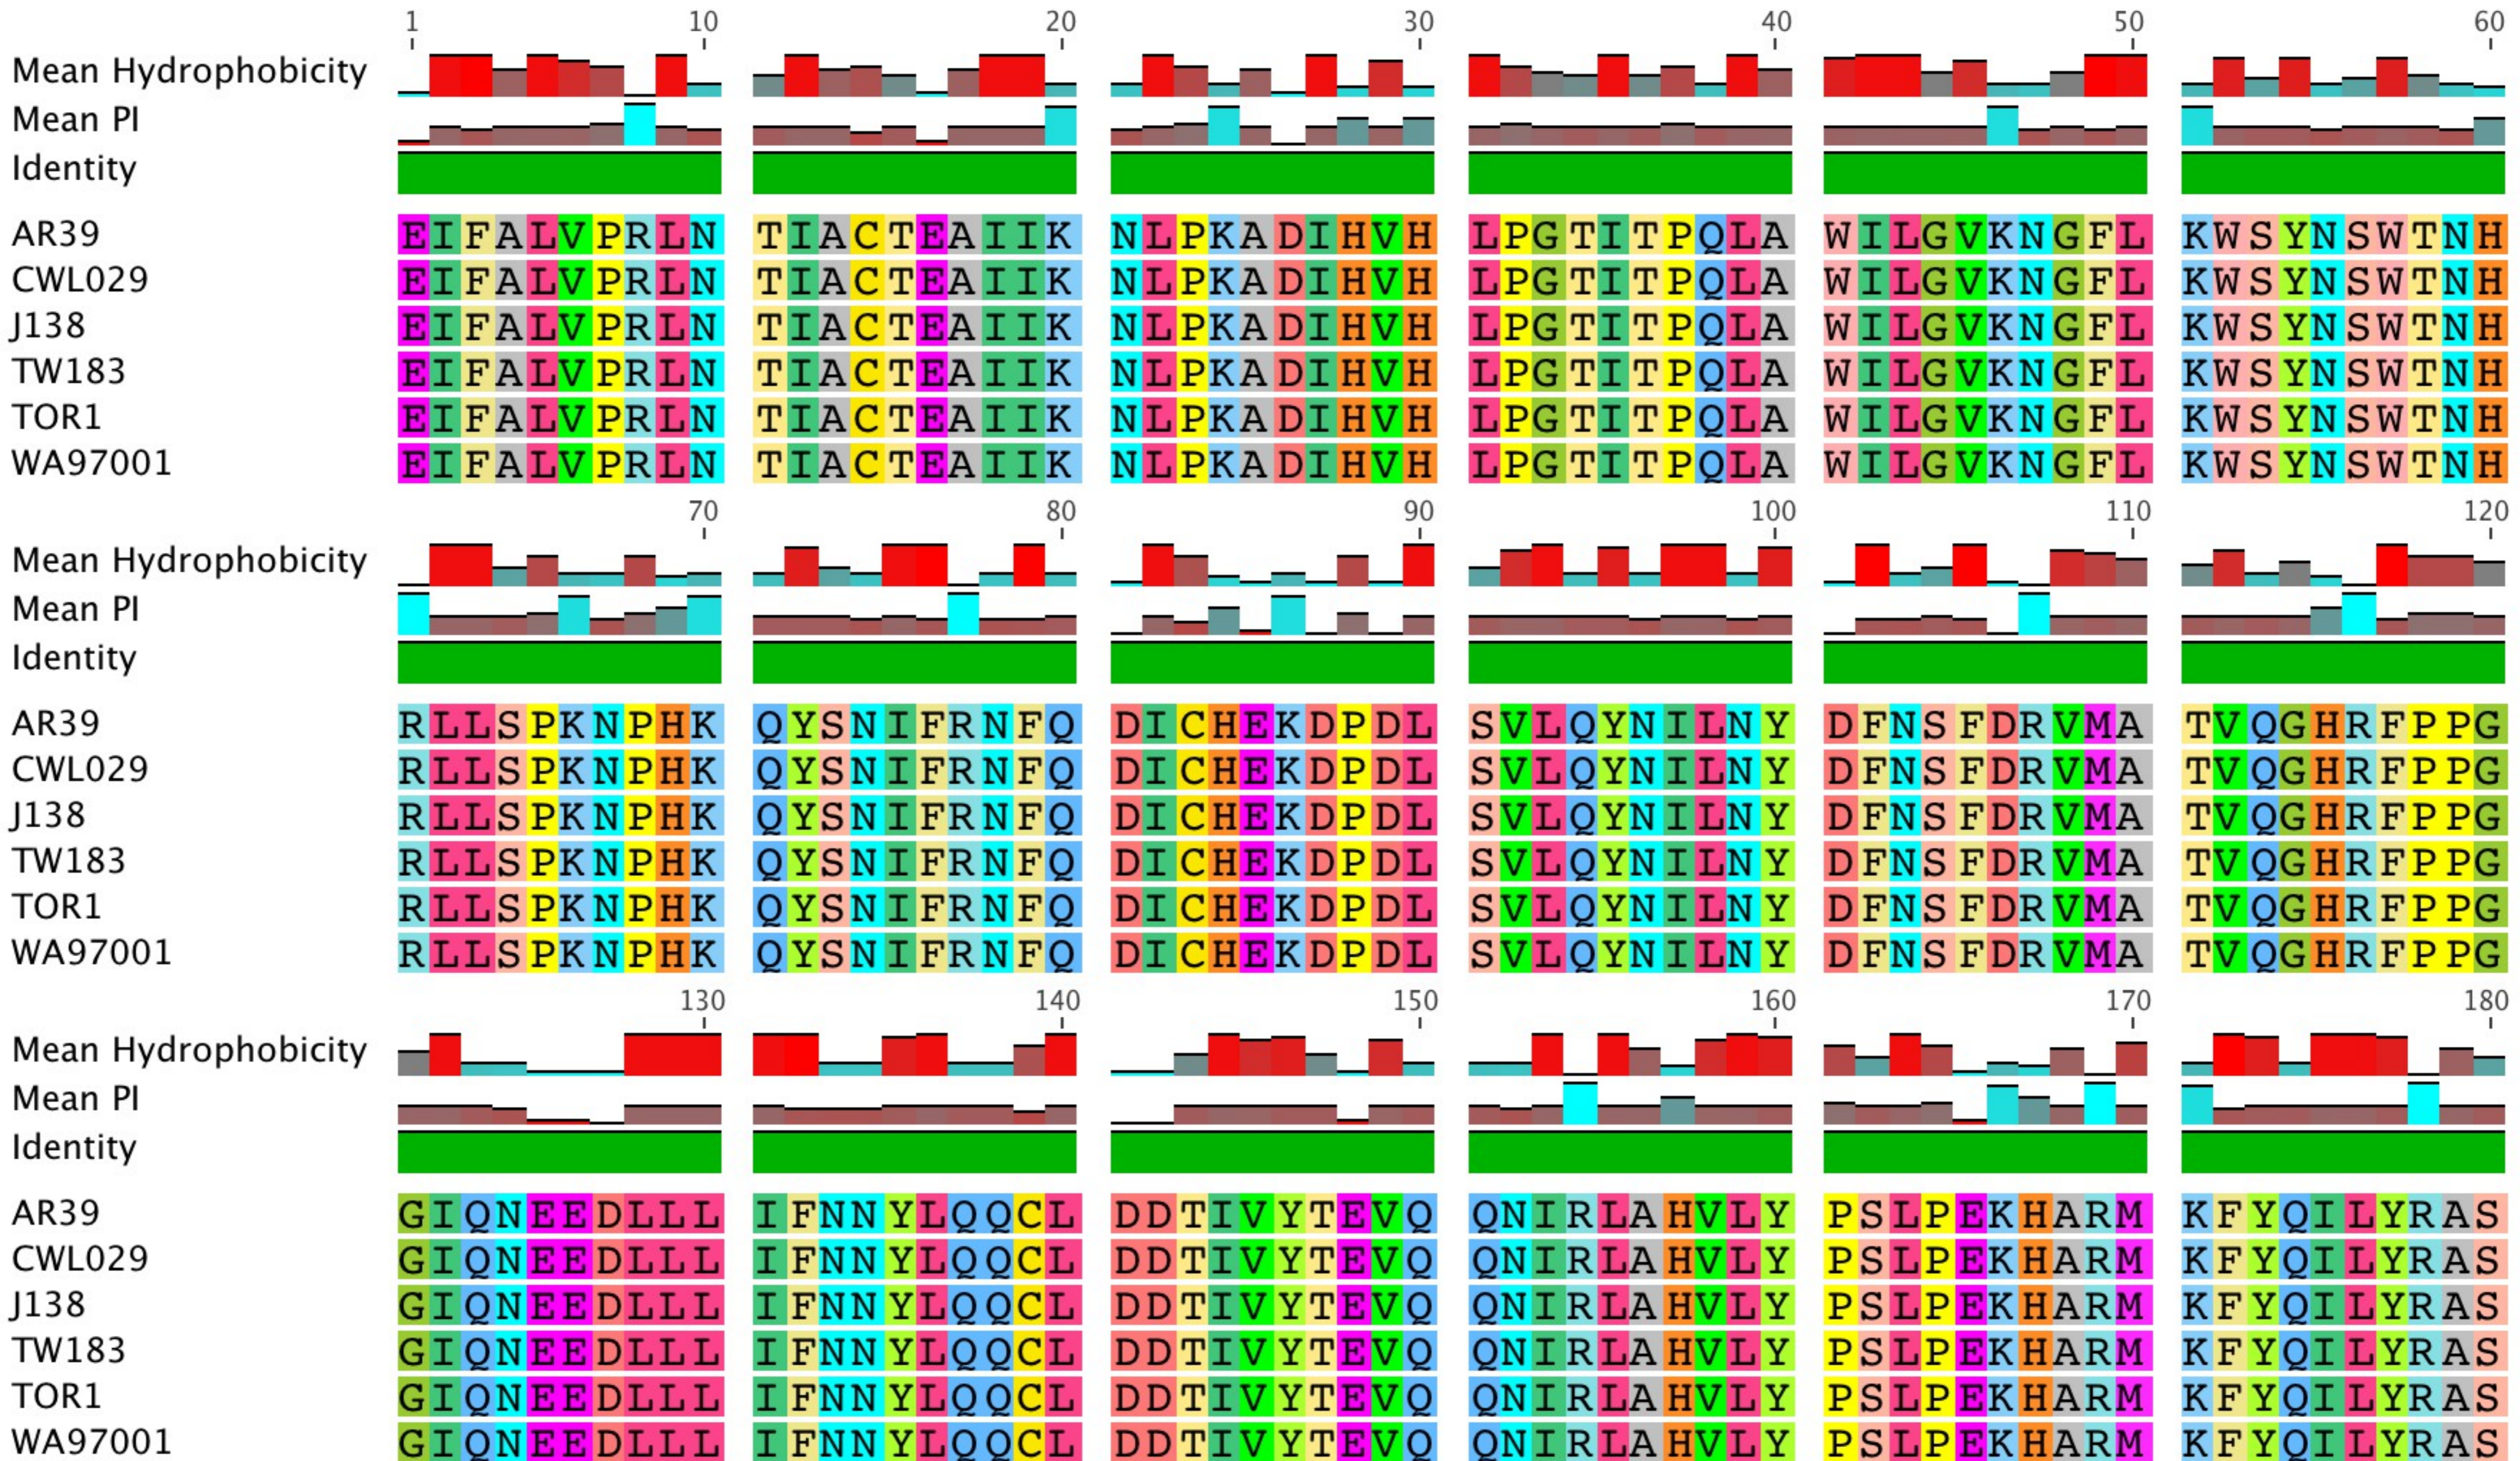

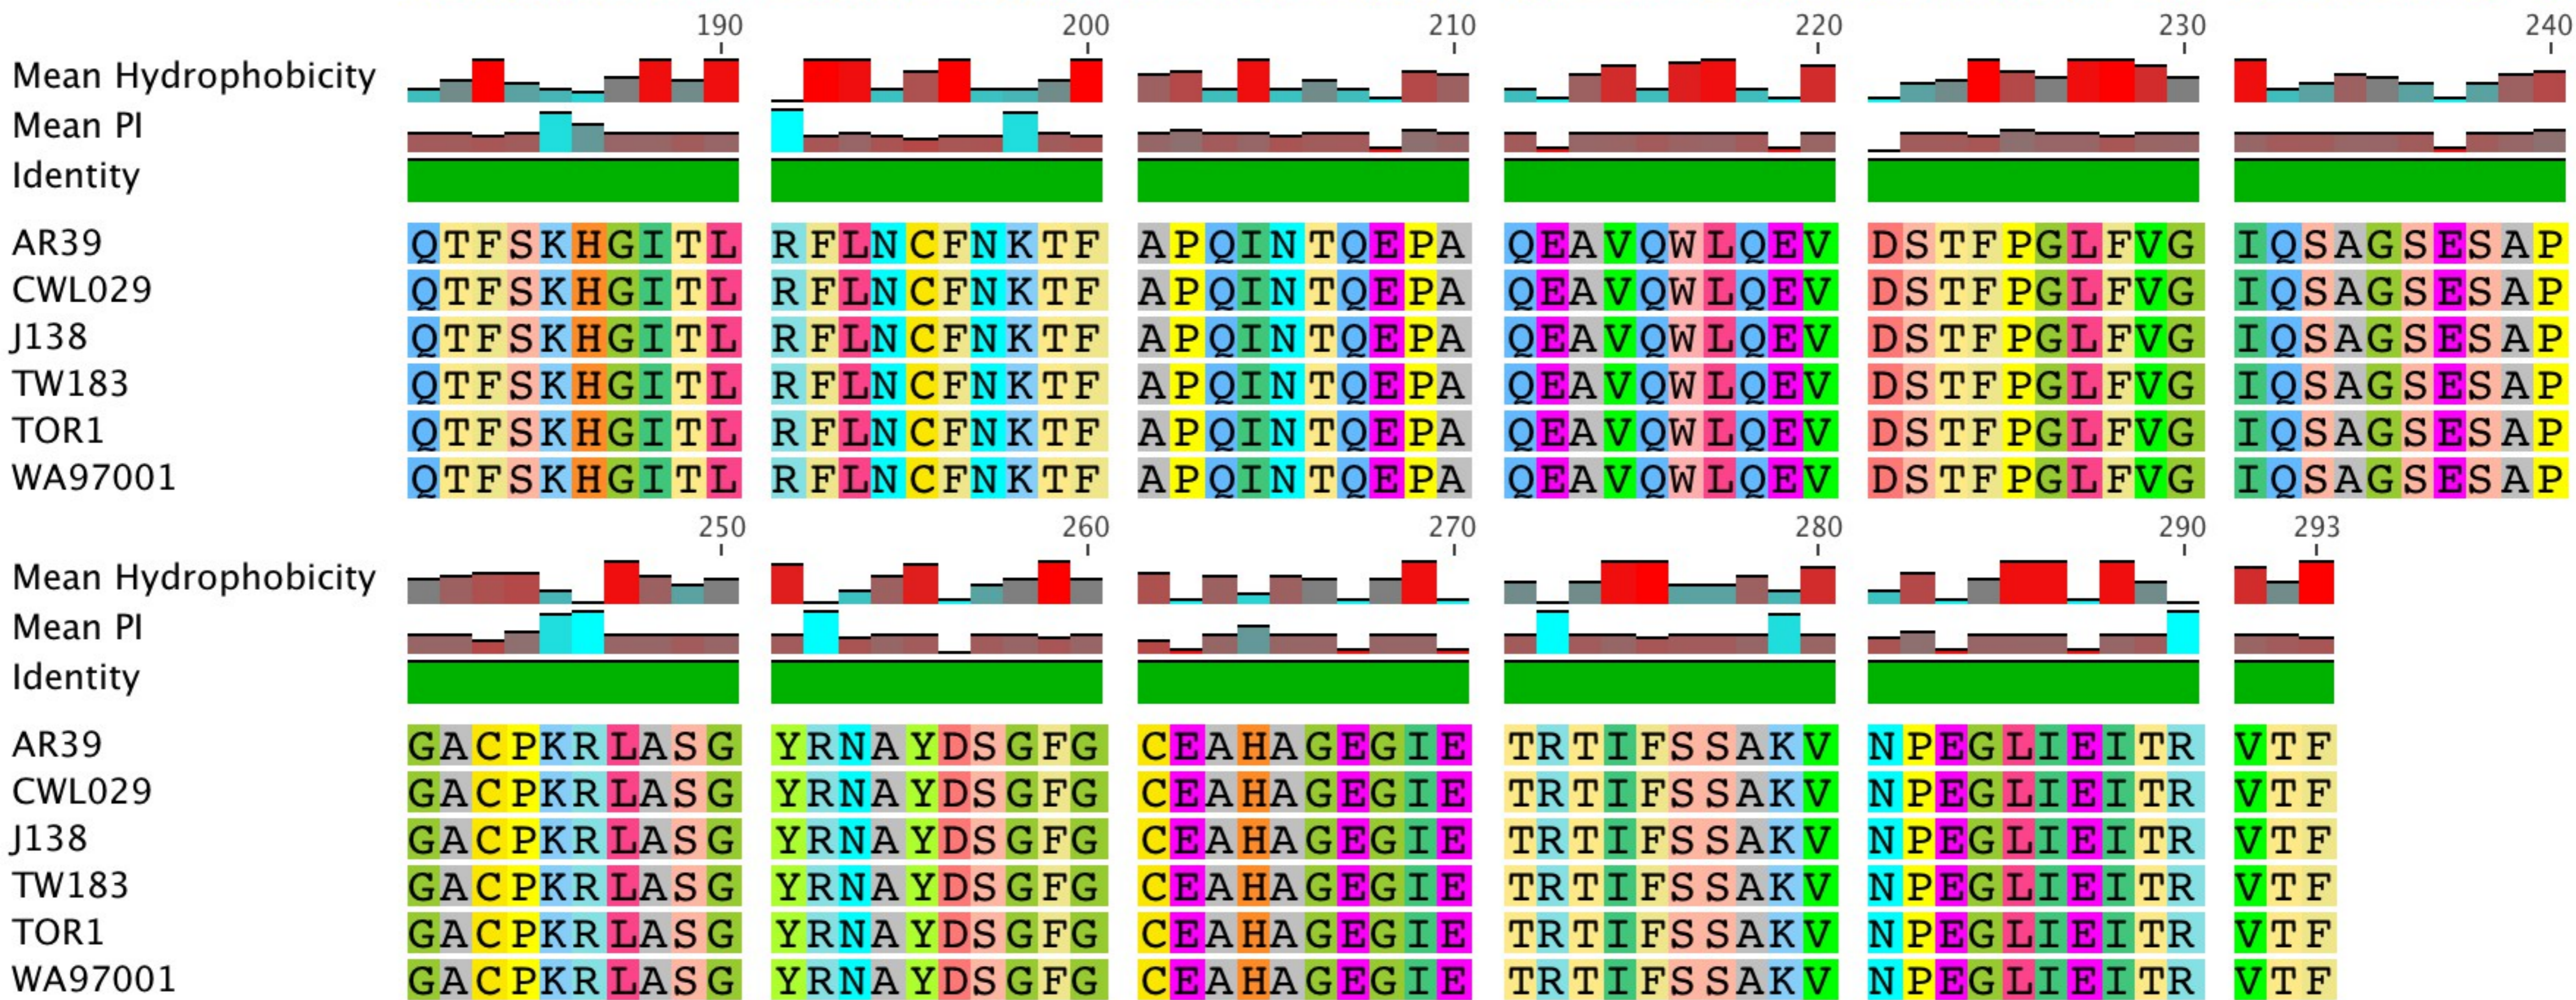

Supplement: ppat.1000903.s019.pdf [file ppat.1000903.s019.pdf]
