# Supplementary material for: Chlamydia pneumoniae Is Genetically Diverse in Animals and Appears to Have Crossed the Host Barrier to Humans on (At Least) Two Occasions
Source: PubMed Central journal article supplement (PMC2873915; doi:10.1371/journal.ppat.1000903), 2010-05-20

|          |            |             |              |             |            |    |
|----------|------------|-------------|--------------|-------------|------------|----|
| Identity | 1          | 10          | 20           | 30          | 40         | 50 |
| B26      |            |             |              |             |            |    |
| LPCoLN   |            |             |              |             |            |    |
| DE177    |            |             |              |             |            |    |
| N16      |            |             |              |             |            |    |
| B26      | CTAGGTGGGG | AAAAAATAAG  | GATTCTTGCT   | ATCACACCTT  | CTGGACTCCG |    |
| LPCoLN   | CTAGGTGGGG | AAAAAATAAG  | GATTCTTGCT   | ATCACACCTT  | CTGGACTCCG |    |
| DE177    | CTAGGTGGGG | AAAAAATAAG  | GATTCTTGCT   | ATCACACCTT  | CTGGACTCCG |    |
| N16      | CTAGGTGGGG | AAAAAATAAG  | GATTCTTGCT   | ATCACACCTT  | CTGGACTCCG |    |
| Identity | 60         | 70          | 80           | 90          | 100        |    |
| B26      |            |             |              |             |            |    |
| LPCoLN   |            |             |              |             |            |    |
| DE177    |            |             |              |             |            |    |
| N16      |            |             |              |             |            |    |
| B26      | ATGGGCCTCA | ATAAGATCAG  | AAACAATATC   | CACACTAGAA  | AAGGTCTTAA |    |
| LPCoLN   | ATGGGCCTCA | ATAAGATCAG  | AAACAATATC   | CACACTAGAA  | AAGGTCTTAA |    |
| DE177    | ATGGGCCTCA | ATAAGATCAG  | AAACAATATC   | CACACTAGAA  | AAGGTCTTAA |    |
| N16      | ATGGGCCTCA | -TAAGATCAG  | AA-----      | -----CTAGAA | AAGGTCTTAA |    |
| Identity | 110        | 120         | 130          | 140         | 150        |    |
| B26      |            |             |              |             |            |    |
| LPCoLN   |            |             |              |             |            |    |
| DE177    |            |             |              |             |            |    |
| N16      |            |             |              |             |            |    |
| B26      | AGATCCTCTC | TTTCATCTTC  | TTCCCCA TTA  | TCTTAGTAGC  | CTTAGCTTTA |    |
| LPCoLN   | AGATCCTCTC | TTTCATCTTC  | TTCCCCA TTA  | TCTTAGTAGC  | CTTAGCTTTA |    |
| DE177    | AGATCCTCTC | TTTCATCTTC  | TTCC TCA TTA | TCTTAGTAGC  | CTTAGCTTTA |    |
| N16      | AGATCCTCTC | TTTCATCTTC  | TTCCCCA TTA  | TCTTAGTAGC  | CTTAGCTTTA |    |
| Identity | 160        | 170         | 180          | 190         | 200        |    |
| B26      |            |             |              |             |            |    |
| LPCoLN   |            |             |              |             |            |    |
| DE177    |            |             |              |             |            |    |
| N16      |            |             |              |             |            |    |
| B26      | AGATGTTTTT | TGCACAGAAA  | GTTTGAAGAT   | CGTCAGATAT  | TTTATACATT |    |
| LPCoLN   | AGATGTTTTT | TGCACAGAAA  | GTTTGAAGAT   | CGTCAGATAT  | TTTATACATT |    |
| DE177    | AGATGTTTTT | TGCACAGAAA  | GTTTGAAGAT   | CGTCAGATAT  | TTTATACATT |    |
| N16      | -----      | -----       | -----        | -----       | -----      |    |
| Identity | 210        | 220         | 230          | 240         | 250        |    |
| B26      |            |             |              |             |            |    |
| LPCoLN   |            |             |              |             |            |    |
| DE177    |            |             |              |             |            |    |
| N16      |            |             |              |             |            |    |
| B26      | AACTTTAGAC | AAACCCATTG  | AGCAATTCA T  | TGCAAAGCA T | CCTGAATTTA |    |
| LPCoLN   | AACTTTAGAC | AAACCCATTG  | AGCAATTCA T  | TGCAAAGCA T | CCTGAATTTA |    |
| DE177    | AACTTTAGAC | AAACCCATTG  | AGCAATTCA T  | TGCAAAGCA T | CCTGAATTTA |    |
| N16      | -----      | -----       | -----        | -----       | -----      |    |
| Identity | 260        | 270         | 280          | 290         | 300        |    |
| B26      |            |             |              |             |            |    |
| LPCoLN   |            |             |              |             |            |    |
| DE177    |            |             |              |             |            |    |
| N16      |            |             |              |             |            |    |
| B26      | TAGAAAAAAG | CTTTCCTTGAT | GCCTCTCCTG   | TATTCTTTTC  | ATTACCAAAA |    |
| LPCoLN   | TAGAAAAAAG | CTTTCCTTGAT | GCCTCTCCTG   | TATTCTTTTC  | ATTACCAAAA |    |
| DE177    | TAGAAAAAAG | CTTTCCTTGAT | GCCTCTCCTG   | TATTCTTTTC  | ATTACCAAAA |    |
| N16      | -----      | -----       | -----        | -----       | -----      |    |

|          |                                                                                     |                                                                                     |                                                                                      |                                                                                       |                                                                                       |
|----------|-------------------------------------------------------------------------------------|-------------------------------------------------------------------------------------|--------------------------------------------------------------------------------------|---------------------------------------------------------------------------------------|---------------------------------------------------------------------------------------|
| Identity |      |      |      |      |      |
| B26      | ACTATGCGTT                                                                          | TTTTTCGATAT                                                                         | CTCCATACCT                                                                           | GAAGGCACTT                                                                            | CTTGTGTAAA                                                                            |
| LPCoLN   | ACTATGCGTT                                                                          | TTTTTCGATAT                                                                         | CTCCATACCT                                                                           | GAAGGCACTT                                                                            | CTTGTGTAAA                                                                            |
| DE177    | ACTATGCGTT                                                                          | TTTTTCGATAT                                                                         | CTCCATACCT                                                                           | GAAGGCACTT                                                                            | CTTGTGTAAA                                                                            |
| N16      | -----GCGTT                                                                          | TTTTTCGAC <b>A</b> T                                                                | CTC <b>T</b> ATACCT                                                                  | GAAGGCACTT                                                                            | CTTGTGTAAA                                                                            |
| Identity |    |    |    |    |    |
| B26      | GATTACTCAA                                                                          | TCCATAAAAA                                                                          | CGGATAAAAT                                                                           | AGTAAACTCT                                                                            | ATTAAATTCCTA                                                                          |
| LPCoLN   | GATTACTCAA                                                                          | TCCATAAAAA                                                                          | CGGATAAAAT                                                                           | AGTAAACTCT                                                                            | ATTAAATTCCTA                                                                          |
| DE177    | GATTACTCAA                                                                          | TCCATAAAAA                                                                          | CGGATAAAAT                                                                           | AGTAA <b>A</b> TTCCT                                                                  | ATTAAATTCCTA                                                                          |
| N16      | GATTACTCAA                                                                          | TCCATAAAAA                                                                          | CGGATAAAAT                                                                           | AGTAAA-----                                                                           | -----TTCTA                                                                            |
| Identity |    |    |    |    |    |
| B26      | TTAATATAGA                                                                          | TACTCTCCCC                                                                          | TGGGCCTCTT                                                                           | CATGTCTTCA                                                                            | CTTAGATATG                                                                            |
| LPCoLN   | TTAATATAGA                                                                          | TACTCTCCCC                                                                          | TGGGCCTCTT                                                                           | CATGTCTTCA                                                                            | CTTAGATATG                                                                            |
| DE177    | TTAATATAGA                                                                          | TACTCTCCCC                                                                          | TGGGCCTCTT                                                                           | CATGTCTTCA                                                                            | CTTAGATATG                                                                            |
| N16      | TTAATATAGA                                                                          | TACTCTCC--                                                                          | -----CTCTT                                                                           | CATGTCTTCA                                                                            | CTTAGATATG                                                                            |
| Identity |    |    |    |    |    |
| B26      | GGGTTTACAA                                                                          | <b>G</b> TGAGCACCA                                                                  | TCGCCTTCTT                                                                           | ATTGAAGACC                                                                            | TAAAAAAGAA                                                                            |
| LPCoLN   | GGGTTTACAA                                                                          | <b>G</b> TGAGCACCA                                                                  | TCGCCTTCTT                                                                           | ATTGAAGACC                                                                            | TAAAAAAGAA                                                                            |
| DE177    | GGGTTTACAA                                                                          | <b>A</b> TGAGCACCA                                                                  | TCGCCTTCTT                                                                           | ATTGAAGACC                                                                            | TAAAAAAGAA                                                                            |
| N16      | GGGTTTACAA                                                                          | <b>A</b> TGAGCACCA                                                                  | TCGCCTTCTT                                                                           | ATTGAAGACC                                                                            | TAAAAAAGAA                                                                            |
| Identity |  |  |  |  |  |
| B26      | AGAAATATCTT                                                                         | TCACAAATTA                                                                          | GTCACGAAGG                                                                           | TAAGAAACGC                                                                            | CTTATAAAAA                                                                            |
| LPCoLN   | AGAAATATCTT                                                                         | TCACAAATTA                                                                          | GTCACGAAGG                                                                           | TAAGAAACGC                                                                            | CTTATAAAAA                                                                            |
| DE177    | AGAAATATCTT                                                                         | TCACAAATTA                                                                          | GTCACGAAGG                                                                           | TAAGAAACGC                                                                            | CTTATAAAAA                                                                            |
| N16      | AGAAATATCTT                                                                         | TCACAAATTA                                                                          | GTCACGAAGG                                                                           | TAAGAAA <b>A</b> <b>C</b> <b>C</b>                                                    | CTT <b>T</b> TAAAAA                                                                   |

|          |                                                                                   |                                                                                    |                                                                                     |                                                                                     |                                                                                     |
|----------|-----------------------------------------------------------------------------------|------------------------------------------------------------------------------------|-------------------------------------------------------------------------------------|-------------------------------------------------------------------------------------|-------------------------------------------------------------------------------------|
| Identity |   |   |   |   |   |
| B26      | TCCTGTTAGA                                                                        | GTATCTTTTT                                                                         | GATCTTGGCG                                                                          | TAAAACAAGA                                                                          | AGACCCTTTG                                                                          |
| LPCoLN   | TCCTGTTAGA                                                                        | GTATCTTTTT                                                                         | GATCTTGGCG                                                                          | TAAAACAAGA                                                                          | AGACCCTTTG                                                                          |
| DE177    | TCCTGTTAGA                                                                        | GTATCTTTTT                                                                         | GATCTTGGCG                                                                          | TAAAACAAGA                                                                          | AGACCCTTTG                                                                          |
| N16      | TCCTGTTAGA                                                                        | GTATCTTTTT                                                                         | GATCTTGGCG                                                                          | TAAAACAAGA                                                                          | AGACCCTTTG                                                                          |
| Identity |  |  |  |  |  |
| B26      | ACCAATCCAA                                                                        | ATGGTCCTAG                                                                         | ACTGACGCTA                                                                          | TTCCCTGAGA                                                                          | CAATGAAAAA                                                                          |
| LPCoLN   | ACCAATCCAA                                                                        | ATGGTCCTAG                                                                         | ACTGACGCTA                                                                          | TTCCCTGAGA                                                                          | CAATGAAAAA                                                                          |
| DE177    | AC <b>T</b> AA <b>T</b> CC <b>C</b> AA                                            | ATGGTCCTAG                                                                         | ACTGACGCTA                                                                          | TTCCCTGAGA                                                                          | CAATGAAAAA                                                                          |
| N16      | ACCAATCCAA                                                                        | ATGGTCCTAG                                                                         | ACTGACGCTA                                                                          | TTCCCTGAGA                                                                          | CAATGAAAAA                                                                          |
| Identity |  |  |  |  |  |
| B26      | AGGTGAGCAA                                                                        | TTACAAA <b>A</b> GA                                                                | CATTTTGGTT                                                                          | TT-CAGTCTT                                                                          | TTTCAATAA                                                                           |
| LPCoLN   | AGGTGAGCAA                                                                        | TTACAAA <b>A</b> GA                                                                | CATTTTGGTT                                                                          | TT-CAGTCTT                                                                          | TTTCAATAA                                                                           |
| DE177    | A <b>A</b> <b>G</b> GAGCAA                                                        | TTACAAA <b>C</b> GA                                                                | CATTTTGGTT                                                                          | TT-CAGTCTT                                                                          | TTTCAATAA                                                                           |
| N16      | <b>T</b> GG <b>T</b> <b>A</b> AG-AA                                               | TTAC <b>C</b> AA <b>C</b> GA                                                       | CATTTTGGTT                                                                          | TT <b>T</b> CAGTCTT                                                                 | TTTCAATAA                                                                           |

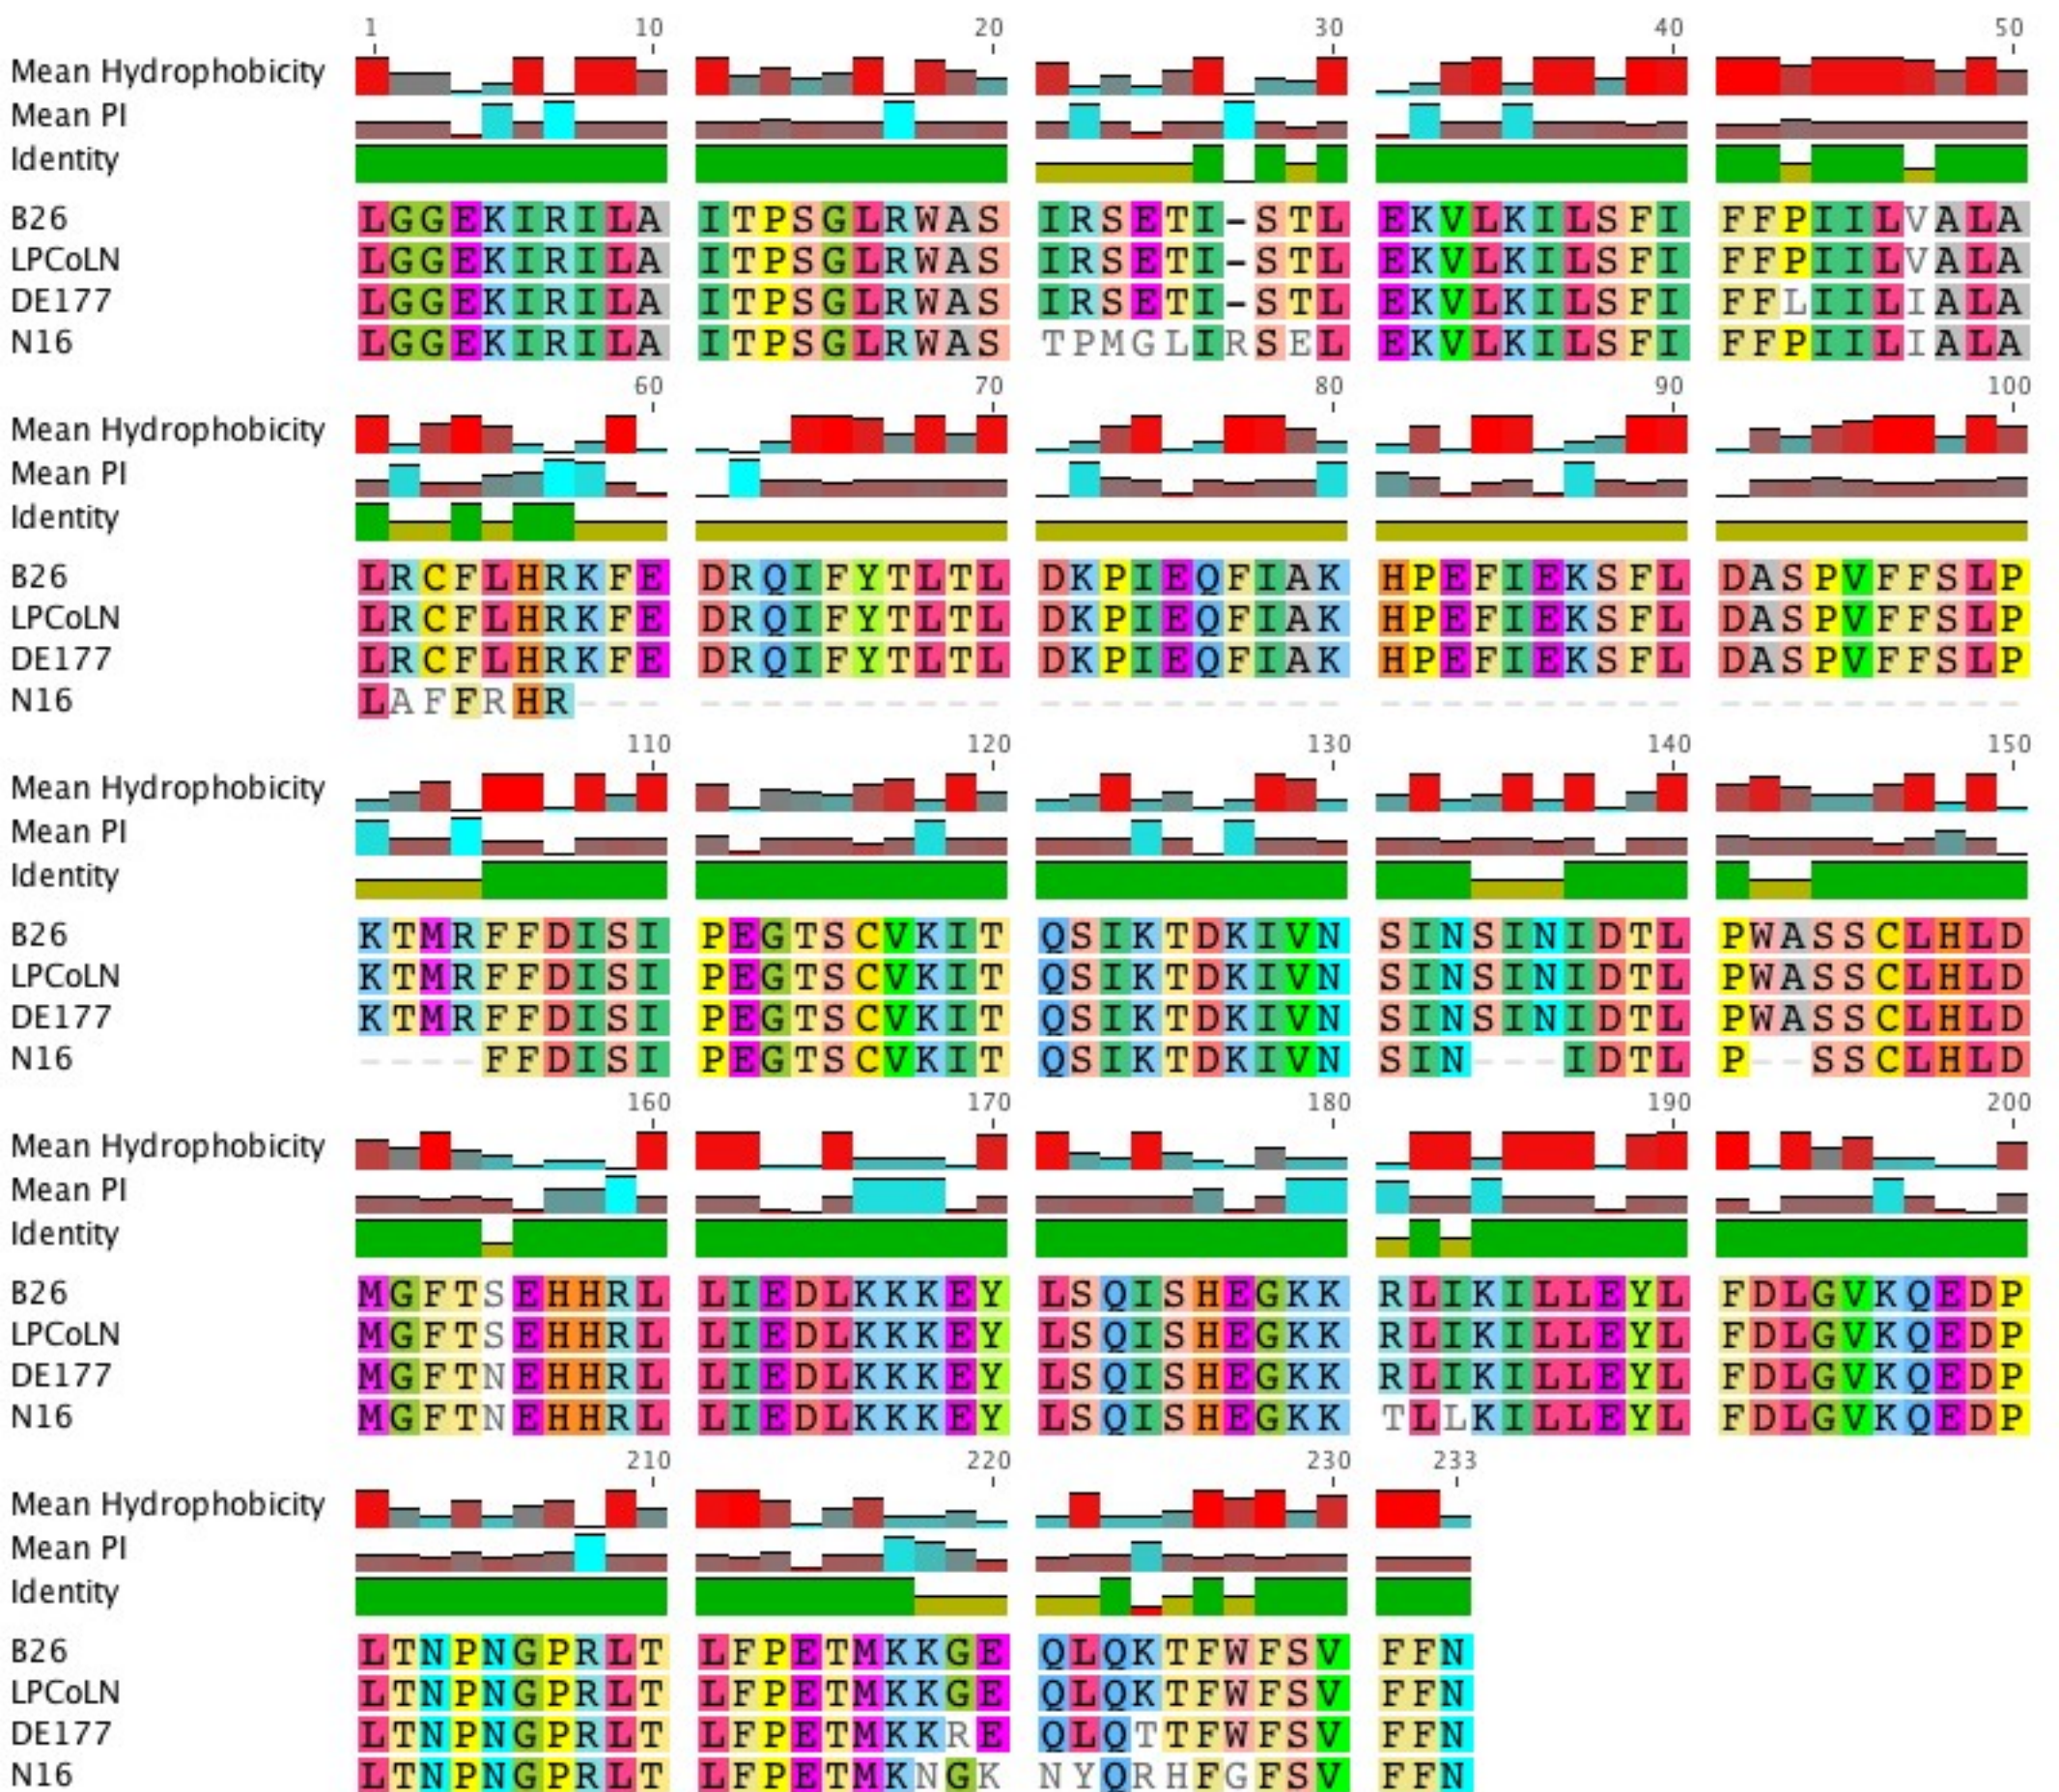

Supplement: ppat.1000903.s020.pdf [file ppat.1000903.s020.pdf]
