# Supplementary material for: Chlamydia pneumoniae Is Genetically Diverse in Animals and Appears to Have Crossed the Host Barrier to Humans on (At Least) Two Occasions
Source: PubMed Central journal article supplement (PMC2873915; doi:10.1371/journal.ppat.1000903), 2010-05-20

|          |             |            |            |            |             |    |
|----------|-------------|------------|------------|------------|-------------|----|
|          | 1           | 10         | 20         | 30         | 40          | 50 |
| Identity |             |            |            |            |             |    |
| B10      | CTACGCTTCT  | GGGATTAAGT | TTTTGGTTTC | TAAATGGTGT | ATCGATCCAT  |    |
| B37      | CTACGCTTCT  | GGGATTAAGT | TTTTGGTTTC | TAAATGGTGT | ATCGATCCAT  |    |
| LPCoLN   | CTACGCTTCT  | GGGATTAAGT | TTTTGGTTTC | TAAATGGTGT | ATCGATCCAT  |    |
| 2040.3   | CTACGCTTCT  | GGGATTAAGT | TTTTGGTTTC | TAAATGGTGT | ATCGATCCAT  |    |
| GBF      | CTACGCTTCT  | GGGATTAAGT | TTTTGGTTTC | TAAATGGTGT | ATCGATCCAT  |    |
| DE177    | CTACGCTTCT  | GGGATTAAGT | TTTTGGTTTC | TAAATGGTGT | ATCGATCCAT  |    |
| N16      | CTACGCTTCT  | GGGATTAAGT | TTTTGGTTTC | TAAATGGTGT | ATCGATTTAT  |    |
|          | 60          | 70         | 80         | 90         | 100         |    |
| Identity |             |            |            |            |             |    |
| B10      | CAATGAAATT  | AGAAGGTTTA | ATTTCTACAG | ATCATTCTGA | AGCATTATTT  |    |
| B37      | CAATGAAATT  | AGAAGGTTTA | ATTTCTACAG | ATCATTCTGA | AGCATTATTT  |    |
| LPCoLN   | CAATGAAATT  | AGAAGGTTTA | ATTTCTACAG | ATCATTCTGA | AGCATTATTT  |    |
| 2040.3   | CAATGAAATT  | AGAAGGTTTA | ATTTCTACAG | ATCATTCTGA | AGCATTATTT  |    |
| GBF      | CAATGAAATT  | AGAAGGTTTA | ATTTCTACAG | ATCATTCTGA | AGCATTATTT  |    |
| DE177    | CAATGAAATT  | AGAAGGTTTA | ATTTCTACAG | ATCATTCTGA | AGCATTATTT  |    |
| N16      | CAATGAAATT  | AGAAG----- | -----      | -----      | -----       |    |
|          | 110         | 120        | 130        | 140        | 150         |    |
| Identity |             |            |            |            |             |    |
| B10      | AGAAATTAAGT | CGTTATCTTG | TTCTCTTACT | GGTAAGTCTA | TATCAGAAGC  |    |
| B37      | AGAAATTAAGT | CGTTATCTTG | TTCTCTTACT | GGTAAGTCTA | TATCAGAAGC  |    |
| LPCoLN   | AGAAATTAAGT | CGTTATCTTG | TTCTCTTACT | GGTAAGTCTA | TATCAGAAGC  |    |
| 2040.3   | AGAAATTAAGT | CGTTATCTTG | TTCTCTTACT | GGTAAGTCTA | TATCAGAAGC  |    |
| GBF      | AGAAATTAAGT | CGTTATCTTG | TTCTCTTACT | GGTAAGTCTA | TATCAGAAGC  |    |
| DE177    | AGAAATTAAGT | CGTTATCTTG | TTCTCTTACT | GGTAAGTCTA | TATCAGAAGC  |    |
| N16      | -----       | -----      | -----      | -----      | -----       |    |
|          | 160         | 170        | 180        | 190        | 200         |    |
| Identity |             |            |            |            |             |    |
| B10      | TTCTAAACAA  | GCTAGAGCAG | CTTGTTATAT | TTCTTTTACC | AAATTTTTTAT |    |
| B37      | TTCTAAACAA  | GCTAGAGCAG | CTTGTTATAT | TTCTTTTACC | AAATTTTTTAT |    |
| LPCoLN   | TTCTAAACAA  | GCTAGAGCAG | CTTGTTATAT | TTCTTTTACC | AAATTTTTTAT |    |
| 2040.3   | TTCTAAACAA  | GCTAGAGCAG | CTTGTTATAT | TTCTTTTACC | AAATTTTTTAT |    |
| GBF      | TTCTAAACAA  | GCTAGAGCAG | CTTGTTATAT | TTCTTTTACC | AAATTTTTTAT |    |
| DE177    | TTCTAAACAA  | GCTAGAGCAG | CTTGTTATAT | TTCTTTTACC | AAATTTTTTAT |    |
| N16      | -----       | -----      | -----      | -----      | -----       |    |

|          | 210                 | 220                 | 230                 | 240                 | 250                 |
|----------|---------------------|---------------------|---------------------|---------------------|---------------------|
| Identity |                     |                     |                     |                     |                     |
| B10      | A T C G C T T A A C | C A A A G G T G T T | G T T A G A C A A G | C T T C T C C A A T | T A G G G A C T T T |
| B37      | A T C G C T T A A C | C A A A G G T G T T | G T T A G A C A A G | C T T C T C C A A T | T A G G G A C T T T |
| LPCoLN   | A T C G C T T A A C | C A A A G G T G T T | G T T A G A C A A G | C T T C T C C A A T | T A G G G A C T T T |
| 2040.3   | A T C G C T T A A C | C A A A G G T G T T | G T T A G A C A A G | C T T C T C C A A T | T A G G G A C T T T |
| GBF      | A T C G C T T A A C | C A A A G G T G T T | G T T A G A C A A G | C T T C T C C A A T | T A G G G A C T T T |
| DE177    | A T C G C T T A A C | C A A A G G T G T T | G T T A G A C A A G | C T T C T C C A A T | T A G G G A C T T T |
| N16      | - - - - -           | - - - - -           | - - - - -           | C T T C T C C A A T | T A G G G A C T T T |

|          | 260                        | 270                 | 280                 | 290                        | 300                 |
|----------|----------------------------|---------------------|---------------------|----------------------------|---------------------|
| Identity |                            |                     |                     |                            |                     |
| B10      | G G C A A C G C A A        | C A T T T T A T A A | A A T C C G A G A C | A A A G T A A A G A        | C G G A G T T T A T |
| B37      | G G C A A C G C A A        | C A T T T T A T A A | A A T C C G A G A C | A A A G T A A A G A        | C G G A G T T T A T |
| LPCoLN   | G G C A A C G C A A        | C A T T T T A T A A | A A T C C G A G A C | A A A G T A A A G A        | C G G A G T T T A T |
| 2040.3   | G G C A A C G C A A        | C A T T T T A T A A | A A T C C G A G A C | A A A G T A A A G A        | C G G A G T T T A T |
| GBF      | G G C A A C G C A A        | C A T T T T A T A A | A A T C C G A G A C | A A A G T A A A G A        | C G G A G T T T A T |
| DE177    | G G C A A C G C A A        | C A T T T T A T A A | A A T C C G A G A C | A A A G T A A A G A        | C G G A G T T T A T |
| N16      | G G C A A <b>T</b> G C A A | C A T T T T A T A A | A A T C C G A G A C | A A A G T A A <b>G</b> G A | C G G A G T T T A T |

|          | 310                 | 320                        | 330                 | 340                 | 350                 |
|----------|---------------------|----------------------------|---------------------|---------------------|---------------------|
| Identity |                     |                            |                     |                     |                     |
| B10      | T T C T A A A C G A | G A G T G G C T A T        | T G T T T T T T G A | T T C T T T A A A A | A A A A G A A G C T |
| B37      | T T C T A A A C G A | G A G T G G C T A T        | T G T T T T T T G A | T T C T T T A A A A | A A A A G A A G C T |
| LPCoLN   | T T C T A A A C G A | G A G T G G C T A T        | T G T T T T T T G A | T T C T T T A A A A | A A A A G A A G C T |
| 2040.3   | T T C T A A A C G A | G A G T G G C T A T        | T G T T T T T T G A | T T C T T T A A A A | A A A A G A A G C T |
| GBF      | T T C T A A A C G A | G A G T G G C T A T        | T G T T T T T T G A | T T C T T T A A A A | A A A A G A A G C T |
| DE177    | T T C T A A A C G A | G A G T G G C T A T        | T G T T T T T T G A | T T C T T T A A A A | A A A A G A A G C T |
| N16      | T T C T A A A C G A | G A G T <b>A</b> G C T A T | T G T T T T T T G A | T T C T T T A A A A | A A A A G A A G C T |

|          | 360                 | 369               |
|----------|---------------------|-------------------|
| Identity |                     |                   |
| B10      | A C A G A G A T T A | T T T G A T T G G |
| B37      | A C A G A G A T T A | T T T G A T T G G |
| LPCoLN   | A C A G A G A T T A | T T T G A T T G G |
| 2040.3   | A C A G A G A T T A | T T T G A T T G G |
| GBF      | A C A G A G A T T A | T T T G A T T G G |
| DE177    | A C A G A G A T T A | T T T G A T T G G |
| N16      | A C A G A G A T T A | T T T G A T T G G |



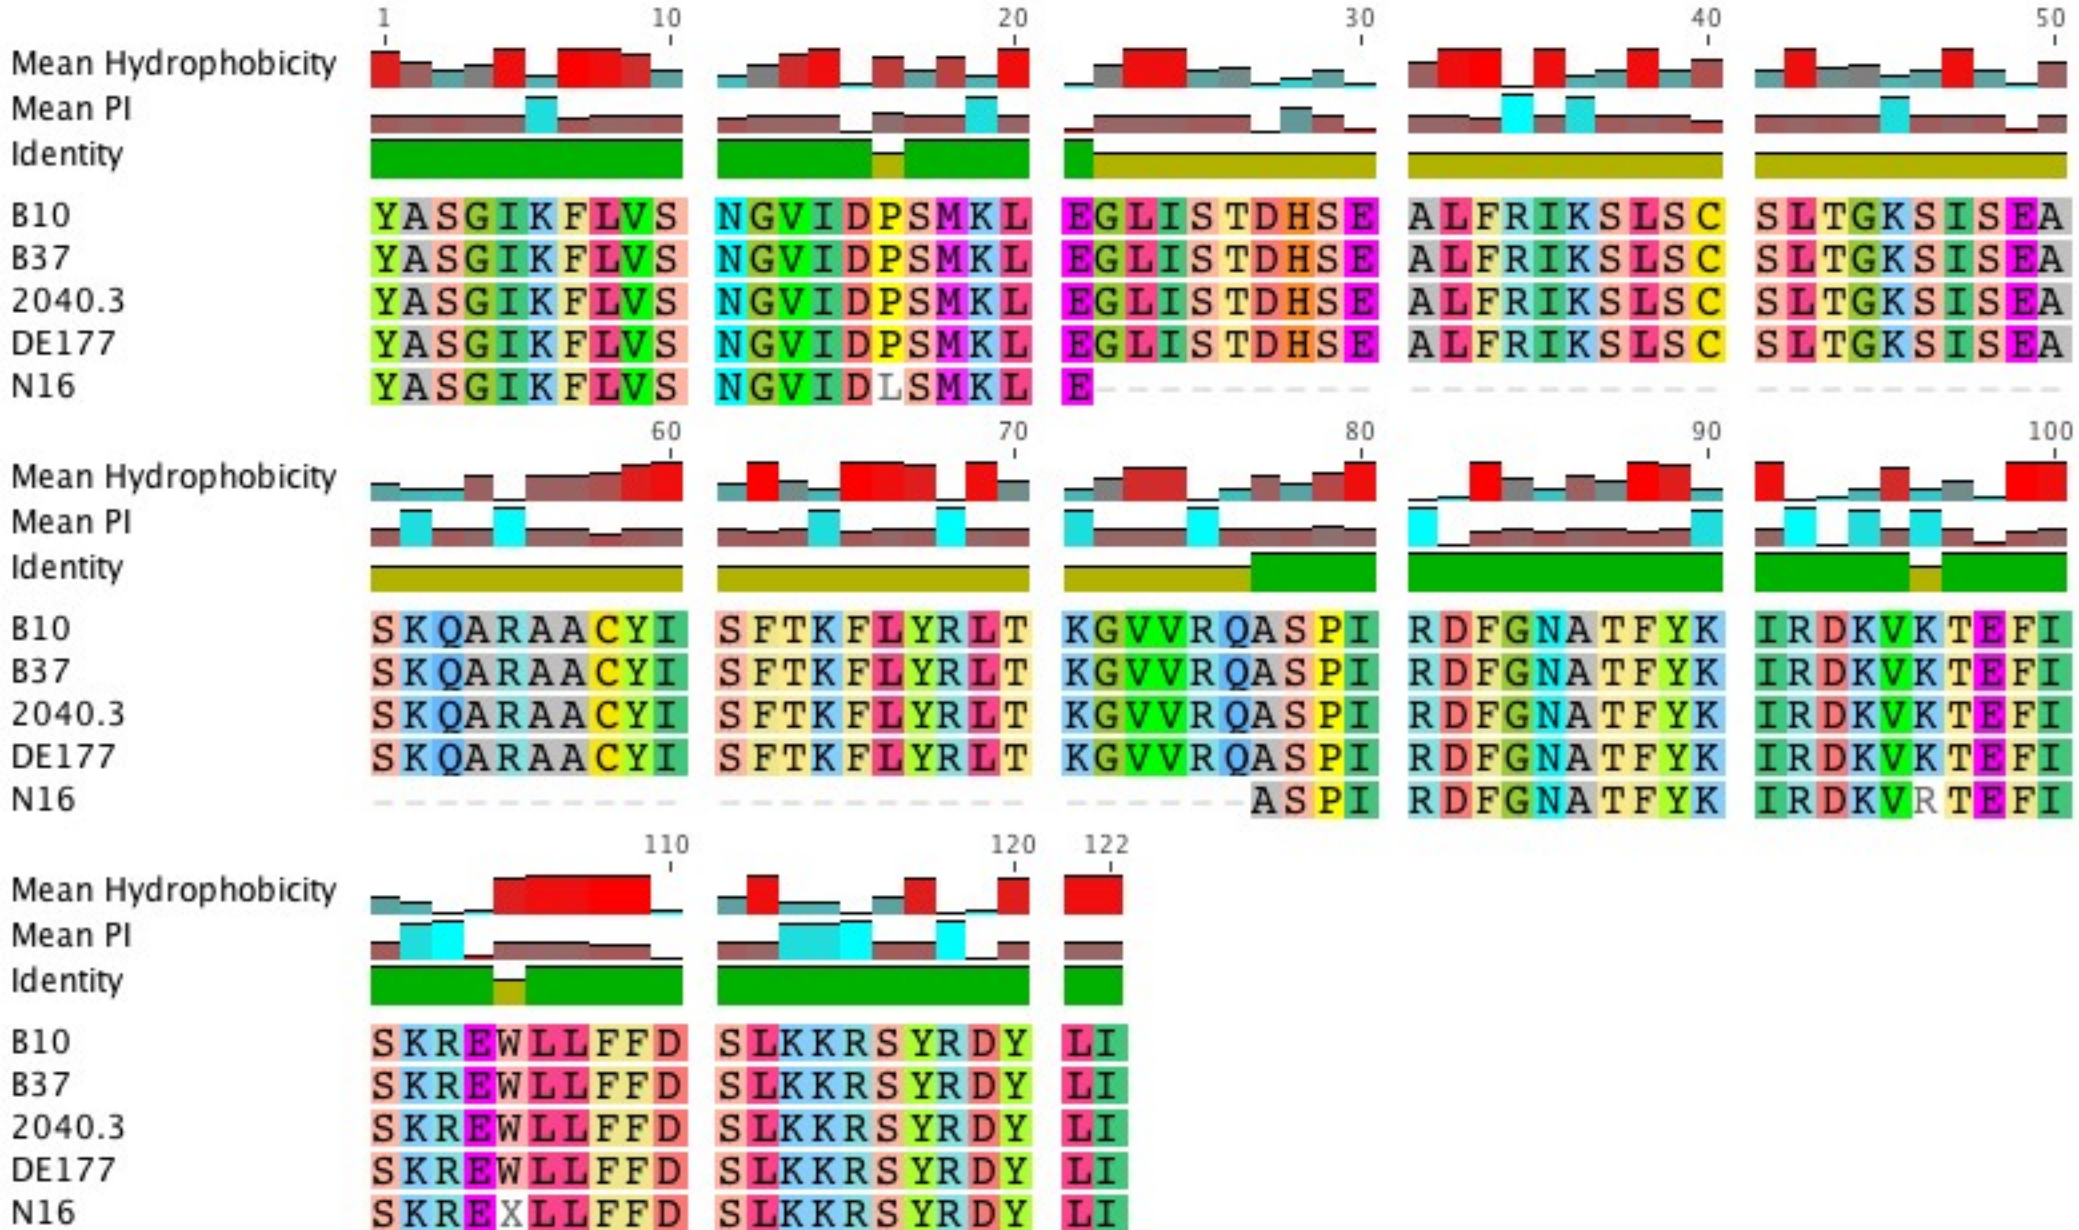

Supplement: ppat.1000903.s021.pdf [file ppat.1000903.s021.pdf]
