# Supplementary material for: Chlamydia pneumoniae Is Genetically Diverse in Animals and Appears to Have Crossed the Host Barrier to Humans on (At Least) Two Occasions
Source: PubMed Central journal article supplement (PMC2873915; doi:10.1371/journal.ppat.1000903), 2010-05-20

|          | 1           | 10          | 20         | 30         | 40          | 50         | 60 |  |
|----------|-------------|-------------|------------|------------|-------------|------------|----|--|
| Identity |             |             |            |            |             |            |    |  |
| B10      | TTG TAGAGAG | AATTA TTTCA | AATTTAAGTG | AAGTATCTTG | TGAAAA TTTA | AGAAGAGGTA |    |  |
| B26      | TTG TAGAGAG | AATTA TTTCA | AATTTAAGTG | AAGTATCTTG | TGAAAA TTTA | AGAAGAGGTA |    |  |
| B37      | TTG TAGAGAG | AATTA TTTCA | AATTTAAGTG | AAGTATCTTG | TGAAAA TTTA | AGAAGAGGTA |    |  |
| EBB      | TTG TAGAGAG | AATTA TTTCA | AATTTAAGTG | AAGTATCTTG | TGAAAA TTTA | AGAAGAGGTA |    |  |
| LPCoLN   | TTG TAGAGAG | AATTA TTTCA | AATTTAAGTG | AAGTATCTTG | TGAAAA TTTA | AGAAGAGGTA |    |  |
| 2040.3   | TTG TAGAGAG | AATTA TTTCA | AATTTAAGTG | AAGTATCTTG | TGAAAA TTTA | AGAAGAGGTA |    |  |
| DE177    | TTG TAGAGAG | AATTA TTTCA | AATTTAAGTG | AAGTATCTTG | TGAAAA TTTA | AGAAGAGGTA |    |  |
| N16      | TTG TAGAGAG | AATTA TTTCA | AATTTAAGTG | AAGTATCTTG | TGAAAA TTTA | AGAAGAGGTA |    |  |

|          | 70         | 80         | 90         | 100         | 110        | 120                 |
|----------|------------|------------|------------|-------------|------------|---------------------|
| Identity |            |            |            |             |            |                     |
| B10      | ATTTTTCGAG | AGAAACTTTA | TCGAAAGTTG | AAAAAA TTAG | TTCGGATCTT | CAATCTTCTC          |
| B26      | ATTTTTCGAG | AGAAACTTTA | TCGAAAGTTG | AAAAAA TTAG | TTCGGATCTT | CAATCTTCTC          |
| B37      | ATTTTTCGAG | AGAAACTTTA | TCGAAAGTTG | AAAAAA TTAG | TTCGGATCTT | CAATCTTCTC          |
| EBB      | ATTTTTCGAG | AGAAACTTTA | TCGAAAGTTG | AAAAAA TTAG | TTCGGATCTT | CAATCTTCTC          |
| LPCoLN   | ATTTTTCGAG | AGAAACTTTA | TCGAAAGTTG | AAAAAA TTAG | TTCGGATCTT | CAATCTTCTC          |
| 2040.3   | ATTTTTCGAG | AGAAACTTTA | TCGAAAGTTG | AAAAAA TTAG | TTCGGATCTT | CAATCTTCTC          |
| DE177    | ATTTTTCGAG | AGAAACTTTA | TCGAAAGTTG | AAAAAA TTAG | TTCGGATCTT | CAATCTTCTC          |
| N16      | ATTTTTCGAG | AGAAACTTTA | TCGAAAGTTG | AAAAAA TTAG | TTCGGATCTT | CAATCT <b>G</b> CTC |

|          | 130       | 140        | 150         | 160        | 170         | 180        |
|----------|-----------|------------|-------------|------------|-------------|------------|
| Identity |           |            |             |            |             |            |
| B10      | ATTTTTCAT | TTGTGATAAA | AATTG TTCAG | AAATCAATGC | TTTAA TCAAT | CAAGCAACAG |
| B26      | ATTTTTCAT | TTGTGATAAA | AATTG TTCAG | AAATCAATGC | TTTAA TCAAT | CAAGCAACAG |
| B37      | ATTTTTCAT | TTGTGATAAA | AATTG TTCAG | AAATCAATGC | TTTAA TCAAT | CAAGCAACAG |
| EBB      | ATTTTTCAT | TTGTGATAAA | AATTG TTCAG | AAATCAATGC | TTTAA TCAAT | CAAGCAACAG |
| LPCoLN   | ATTTTTCAT | TTGTGATAAA | AATTG TTCAG | AAATCAATGC | TTTAA TCAAT | CAAGCAACAG |
| 2040.3   | ATTTTTCAT | TTGTGATAAA | AATTG TTCAG | AAATCAATGC | TTTAA TCAAT | CAAGCAACAG |
| DE177    | ATTTTTCAT | TTGTGATAAA | AATTG TTCAG | AAATCAATGC | TTTAA TCAAT | CAAGCAACAG |
| N16      | ATTTTTCAT | TTGTGATAAA | AATTG TTCAG | AAATCAATGC | TTTAA TCAAT | CAAGCAACAG |

|          |                                                                                   |                                                                                   |                                                                                    |                                                                                     |                                                                                     |                                                                                     |
|----------|-----------------------------------------------------------------------------------|-----------------------------------------------------------------------------------|------------------------------------------------------------------------------------|-------------------------------------------------------------------------------------|-------------------------------------------------------------------------------------|-------------------------------------------------------------------------------------|
| Identity |    |    |    |    |    |    |
| B10      | CCCTTAAACA                                                                        | TTCCTATGGT                                                                        | ATAGATAATTT                                                                        | TATTCA TAGA                                                                         | CTATTTACAG                                                                          | CTCA TAGAAG                                                                         |
| B26      | CCCTTAAACA                                                                        | TTCCTATGGT                                                                        | ATAGATAATTT                                                                        | TATTCA TAGA                                                                         | CTATTTACAG                                                                          | CTCA TAGAAG                                                                         |
| B37      | CCCTTAAACA                                                                        | TTCCTATGGT                                                                        | ATAGATAATTT                                                                        | TATTCA TAGA                                                                         | CTATTTACAG                                                                          | CTCA TAGAAG                                                                         |
| EBB      | CCCTTAAACA                                                                        | TTCCTATGGT                                                                        | ATAGATAATTT                                                                        | TATTCA TAGA                                                                         | CTATTTACAG                                                                          | CTCA TAGAAG                                                                         |
| LPCoLN   | CCCTTAAACA                                                                        | TTCCTATGGT                                                                        | ATAGATAATTT                                                                        | TATTCA TAGA                                                                         | CTATTTACAG                                                                          | CTCA TAGAAG                                                                         |
| 2040.3   | CCCTTAAACA                                                                        | TTCCTATGGT                                                                        | ATAGATAATTT                                                                        | TATTCA TAGA                                                                         | CTATTTACAG                                                                          | CTCA TAGAAG                                                                         |
| DE177    | CCCTTAAACA                                                                        | TTCCTATGGT                                                                        | ATAGATAATTT                                                                        | TATTCA TAGA                                                                         | CTATTTACAG                                                                          | CTCA TAGAAG                                                                         |
| N16      | CCCTTAAACA                                                                        | TTCCTATGGT                                                                        | ATAGATAATTT                                                                        | TATTCA TAGA                                                                         | CTATTTACAG                                                                          | CTCA TAGAAG                                                                         |
| Identity |  |  |  |  |  |  |
| B10      | CAAATGGACG                                                                        | CTCTGAAAAC                                                                        | AGACAAAAATG                                                                        | AAATAGCATC                                                                          | AAATTTCAAGA                                                                         | AAACTACGTA                                                                          |
| B26      | CAAATGGACG                                                                        | CTCTGAAAAC                                                                        | AGACAAAAATG                                                                        | AAATAGCATC                                                                          | AAATTTCAAGA                                                                         | AAACTACGTA                                                                          |
| B37      | CAAATGGACG                                                                        | CTCTGAAAAC                                                                        | AGACAAAAATG                                                                        | AAATAGCATC                                                                          | AAATTTCAAGA                                                                         | AAACTACGTA                                                                          |
| EBB      | CAAATGGACG                                                                        | CTCTGAAAAC                                                                        | AGACAAAAATG                                                                        | AAATAGCATC                                                                          | AAATTTCAAGA                                                                         | AAACTACGTA                                                                          |
| LPCoLN   | CAAATGGACG                                                                        | CTCTGAAAAC                                                                        | AGACAAAAATG                                                                        | AAATAGCATC                                                                          | AAATTTCAAGA                                                                         | AAACTACGTA                                                                          |
| 2040.3   | CAAATGGACG                                                                        | CTCTGAAAAC                                                                        | AGACAAAAATG                                                                        | AAATAGCATC                                                                          | AAATTTCAAGA                                                                         | AAACTACGTA                                                                          |
| DE177    | CAAATGGACG                                                                        | CTCTGAAAAC                                                                        | AGACAAAAATG                                                                        | AAATAGCATC                                                                          | AAATTTCAAGA                                                                         | AAACTACGTA                                                                          |
| N16      | CAAATGGACG                                                                        | CTCTGAAAAC                                                                        | AGACAAAAATG                                                                        | AAATAGCATC                                                                          | AAATTTCAAGA                                                                         | AAACTACGTA                                                                          |
| Identity |  |  |  |  |  |  |
| B10      | TGTTGTCCGT                                                                        | AGATCTTGAA                                                                        | ATACCAATAG                                                                         | TTTGTTTATC                                                                          | ACAGTTATCT                                                                          | AGAAAGGTT                                                                           |
| B26      | TGTTGTCCGT                                                                        | AGATCTTGAA                                                                        | ATACCAATAG                                                                         | TTTGTTTATC                                                                          | ACAGTTATCT                                                                          | AGAAAGGTT                                                                           |
| B37      | TGTTGTCCGT                                                                        | AGATCTTGAA                                                                        | ATACCAATAG                                                                         | TTTGTTTATC                                                                          | ACAGTTATCT                                                                          | AGAAAGGTT                                                                           |
| EBB      | TGTTGTCCGT                                                                        | AGATCTTGAA                                                                        | ATACCAATAG                                                                         | TTTGTTTATC                                                                          | ACAGTTATCT                                                                          | AGAAAGGTT                                                                           |
| LPCoLN   | TGTTGTCCGT                                                                        | AGATCTTGAA                                                                        | ATACCAATAG                                                                         | TTTGTTTATC                                                                          | ACAGTTATCT                                                                          | AGAAAGGTT                                                                           |
| 2040.3   | TGTTGTCCGT                                                                        | AGATCTTGAA                                                                        | ATACCAATAG                                                                         | TTTGTTTATC                                                                          | ACAGTTATCT                                                                          | AGAAAGGTT                                                                           |
| DE177    | TGTTGTCCGT                                                                        | AGATCTTGAA                                                                        | ATACCAATAG                                                                         | TTTGTTTATC                                                                          | ACAGTTATCT                                                                          | AGAAAGGTT                                                                           |
| N16      | TGTTGTCCGT                                                                        | AGATCTTGAA                                                                        | ATACCAATAG                                                                         | TTTGTTTATC                                                                          | ACAGTTATCT                                                                          | AGAAAGGTT                                                                           |

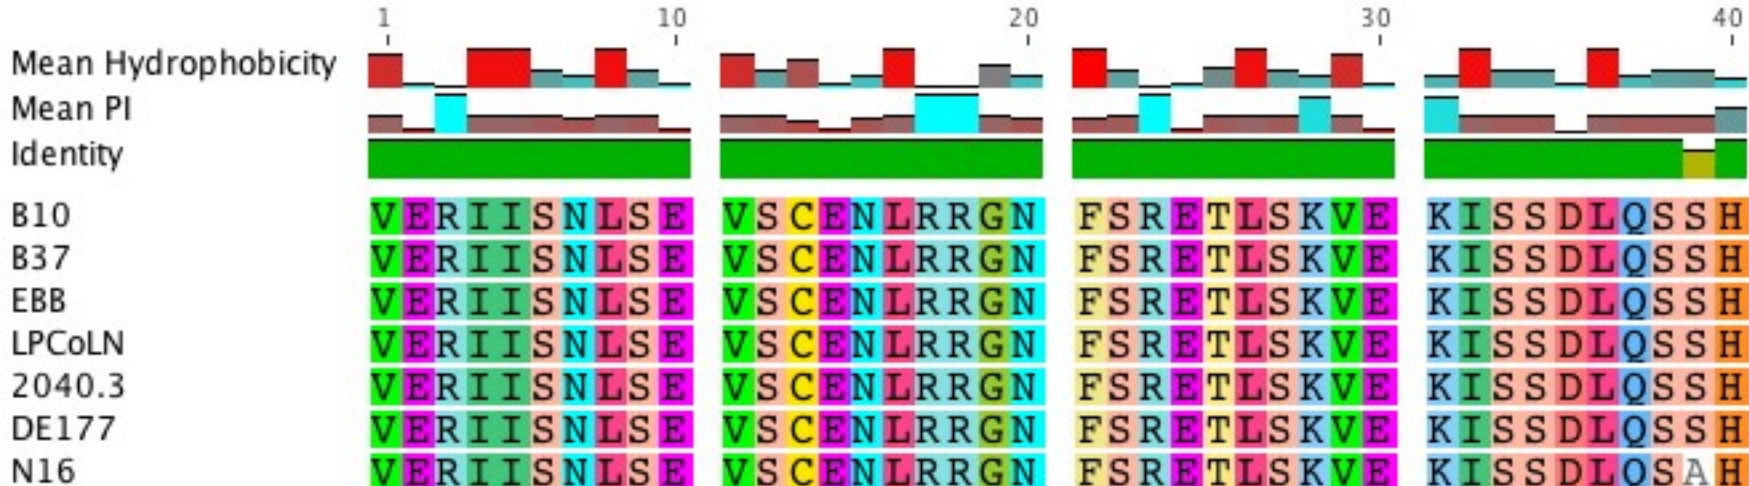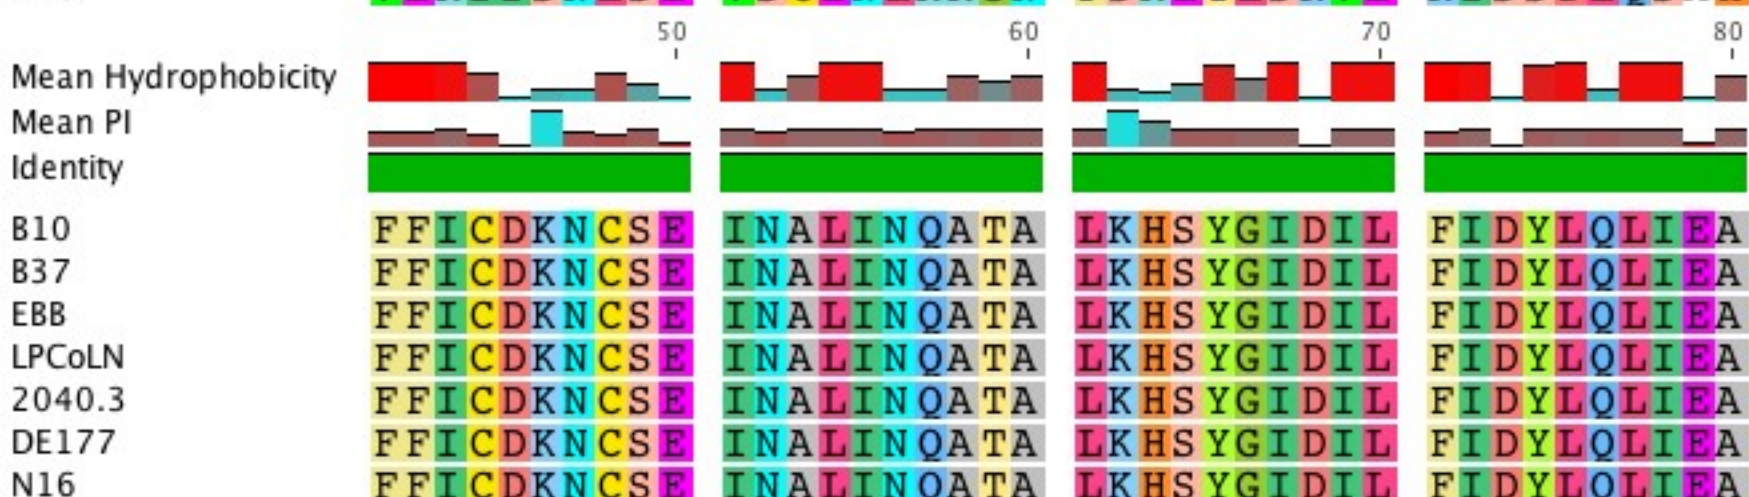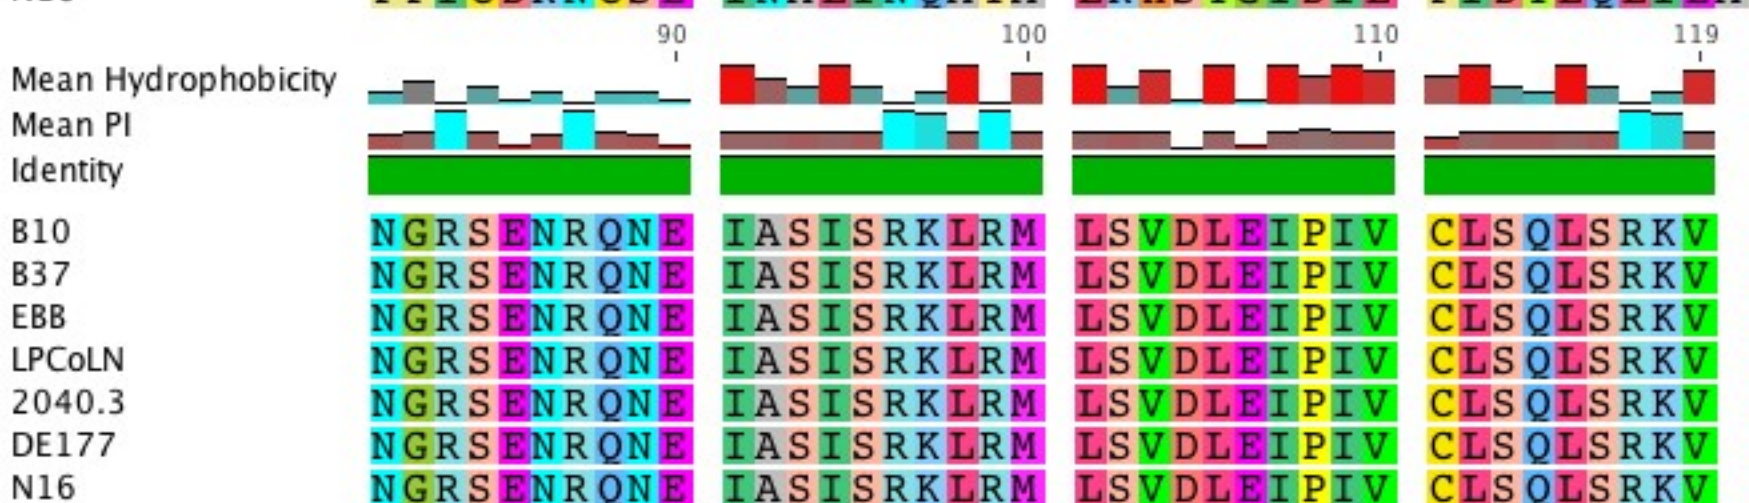

Supplement: ppat.1000903.s022.pdf [file ppat.1000903.s022.pdf]
