# Supplementary material for: Chlamydia pneumoniae Is Genetically Diverse in Animals and Appears to Have Crossed the Host Barrier to Humans on (At Least) Two Occasions
Source: PubMed Central journal article supplement (PMC2873915; doi:10.1371/journal.ppat.1000903), 2010-05-20

|          | 1           | 10         | 20          | 30         | 40         | 50 |
|----------|-------------|------------|-------------|------------|------------|----|
| Identity |             |            |             |            |            |    |
| B10      | TG TTCCTTCC | ATGCGTGTGG | CTATAATAATC | CGCACAAATT | AAGAACATAC |    |
| B26      | TG TTCCTTCC | ATGCGTGTGG | CTATAATAATC | CGCACAAATT | AAGAACATAC |    |
| B37      | TG TTCCTTCC | ATGCGTGTGG | CTATAATAATC | CGCACAAATT | AAGAACATAC |    |
| EBB      | TG TTCCTTCC | ATGCGTGTGG | CTATAATAATC | CGCACAAATT | AAGAACATAC |    |
| LPCoLN   | TG TTCCTTCC | ATGCGTGTGG | CTATAATAATC | CGCACAAATT | AAGAACATAC |    |
| Pot37    | TG TTCCTTCC | ATGCGTGTGG | CTATAATAATC | CGCACAAATT | AAGAACATAC |    |
| 2040.3   | TG TTCCTTCC | ATGCGTGTGG | CTATAATAATC | CGCACAAATT | AAGAACATAC |    |
| DE177    | TG TTCCTTCC | ATGCGTGTGG | CTATAATAATC | CGCACAAATT | AAGAACATAC |    |
| N16      | TG TTCCTTCC | ATGCGTGTGG | CTATAATAATC | CGCACAAATT | AAGAACATAC |    |

|          | 60                   | 70                 | 80                  | 90          |             |
|----------|----------------------|--------------------|---------------------|-------------|-------------|
| Identity |                      |                    |                     |             |             |
| B10      | TATCAGCAATT          | GTCAGGTGTT         | ACTGAGAACG          | AAGCTATTTTC | TG TTCCTCCG |
| B26      | TATCAGCAATT          | GTCAGGTGTT         | ACTGAGAACG          | AAGCTATTTTC | TG TTCCTCCG |
| B37      | TATCAGCAATT          | GTCAGGTGTT         | ACTGAGAACG          | AAGCTATTTTC | TG TTCCTCCG |
| EBB      | TATCAGCAATT          | GTCAGGTGTT         | ACTGAGAACG          | AAGCTATTTTC | TG TTCCTCCG |
| LPCoLN   | TATCAGCAATT          | GTCAGGTGTT         | ACTGAGAACG          | AAGCTATTTTC | TG TTCCTCCG |
| Pot37    | TATCAGCAATT          | GTCAGGTGTT         | ACTGAGAACG          | AAGCTATTTTC | TG TTCCTCCG |
| 2040.3   | TATCAGCAATT          | GTCAGGTGTT         | ACTGAGAACG          | AAGCTATTTTC | TG TTCCTCCG |
| DE177    | TATCAGCAATT          | GTCAGGTGTT         | ACTGAGAACG          | AAGCTATTTTC | TG TTCCTCCG |
| N16      | TAT <b>T</b> AGCAATT | <b>A</b> TCAGGTGTT | ACTGA <b>A</b> GACG | AAGCTATTTTC | TG TTCCTCCG |

|          | 101 |
|----------|-----|
| Identity |     |
| B10      | T   |
| B26      | T   |
| B37      | T   |
| EBB      | T   |
| LPCoLN   | T   |
| Pot37    | T   |
| 2040.3   | T   |
| DE177    | T   |
| N16      | T   |

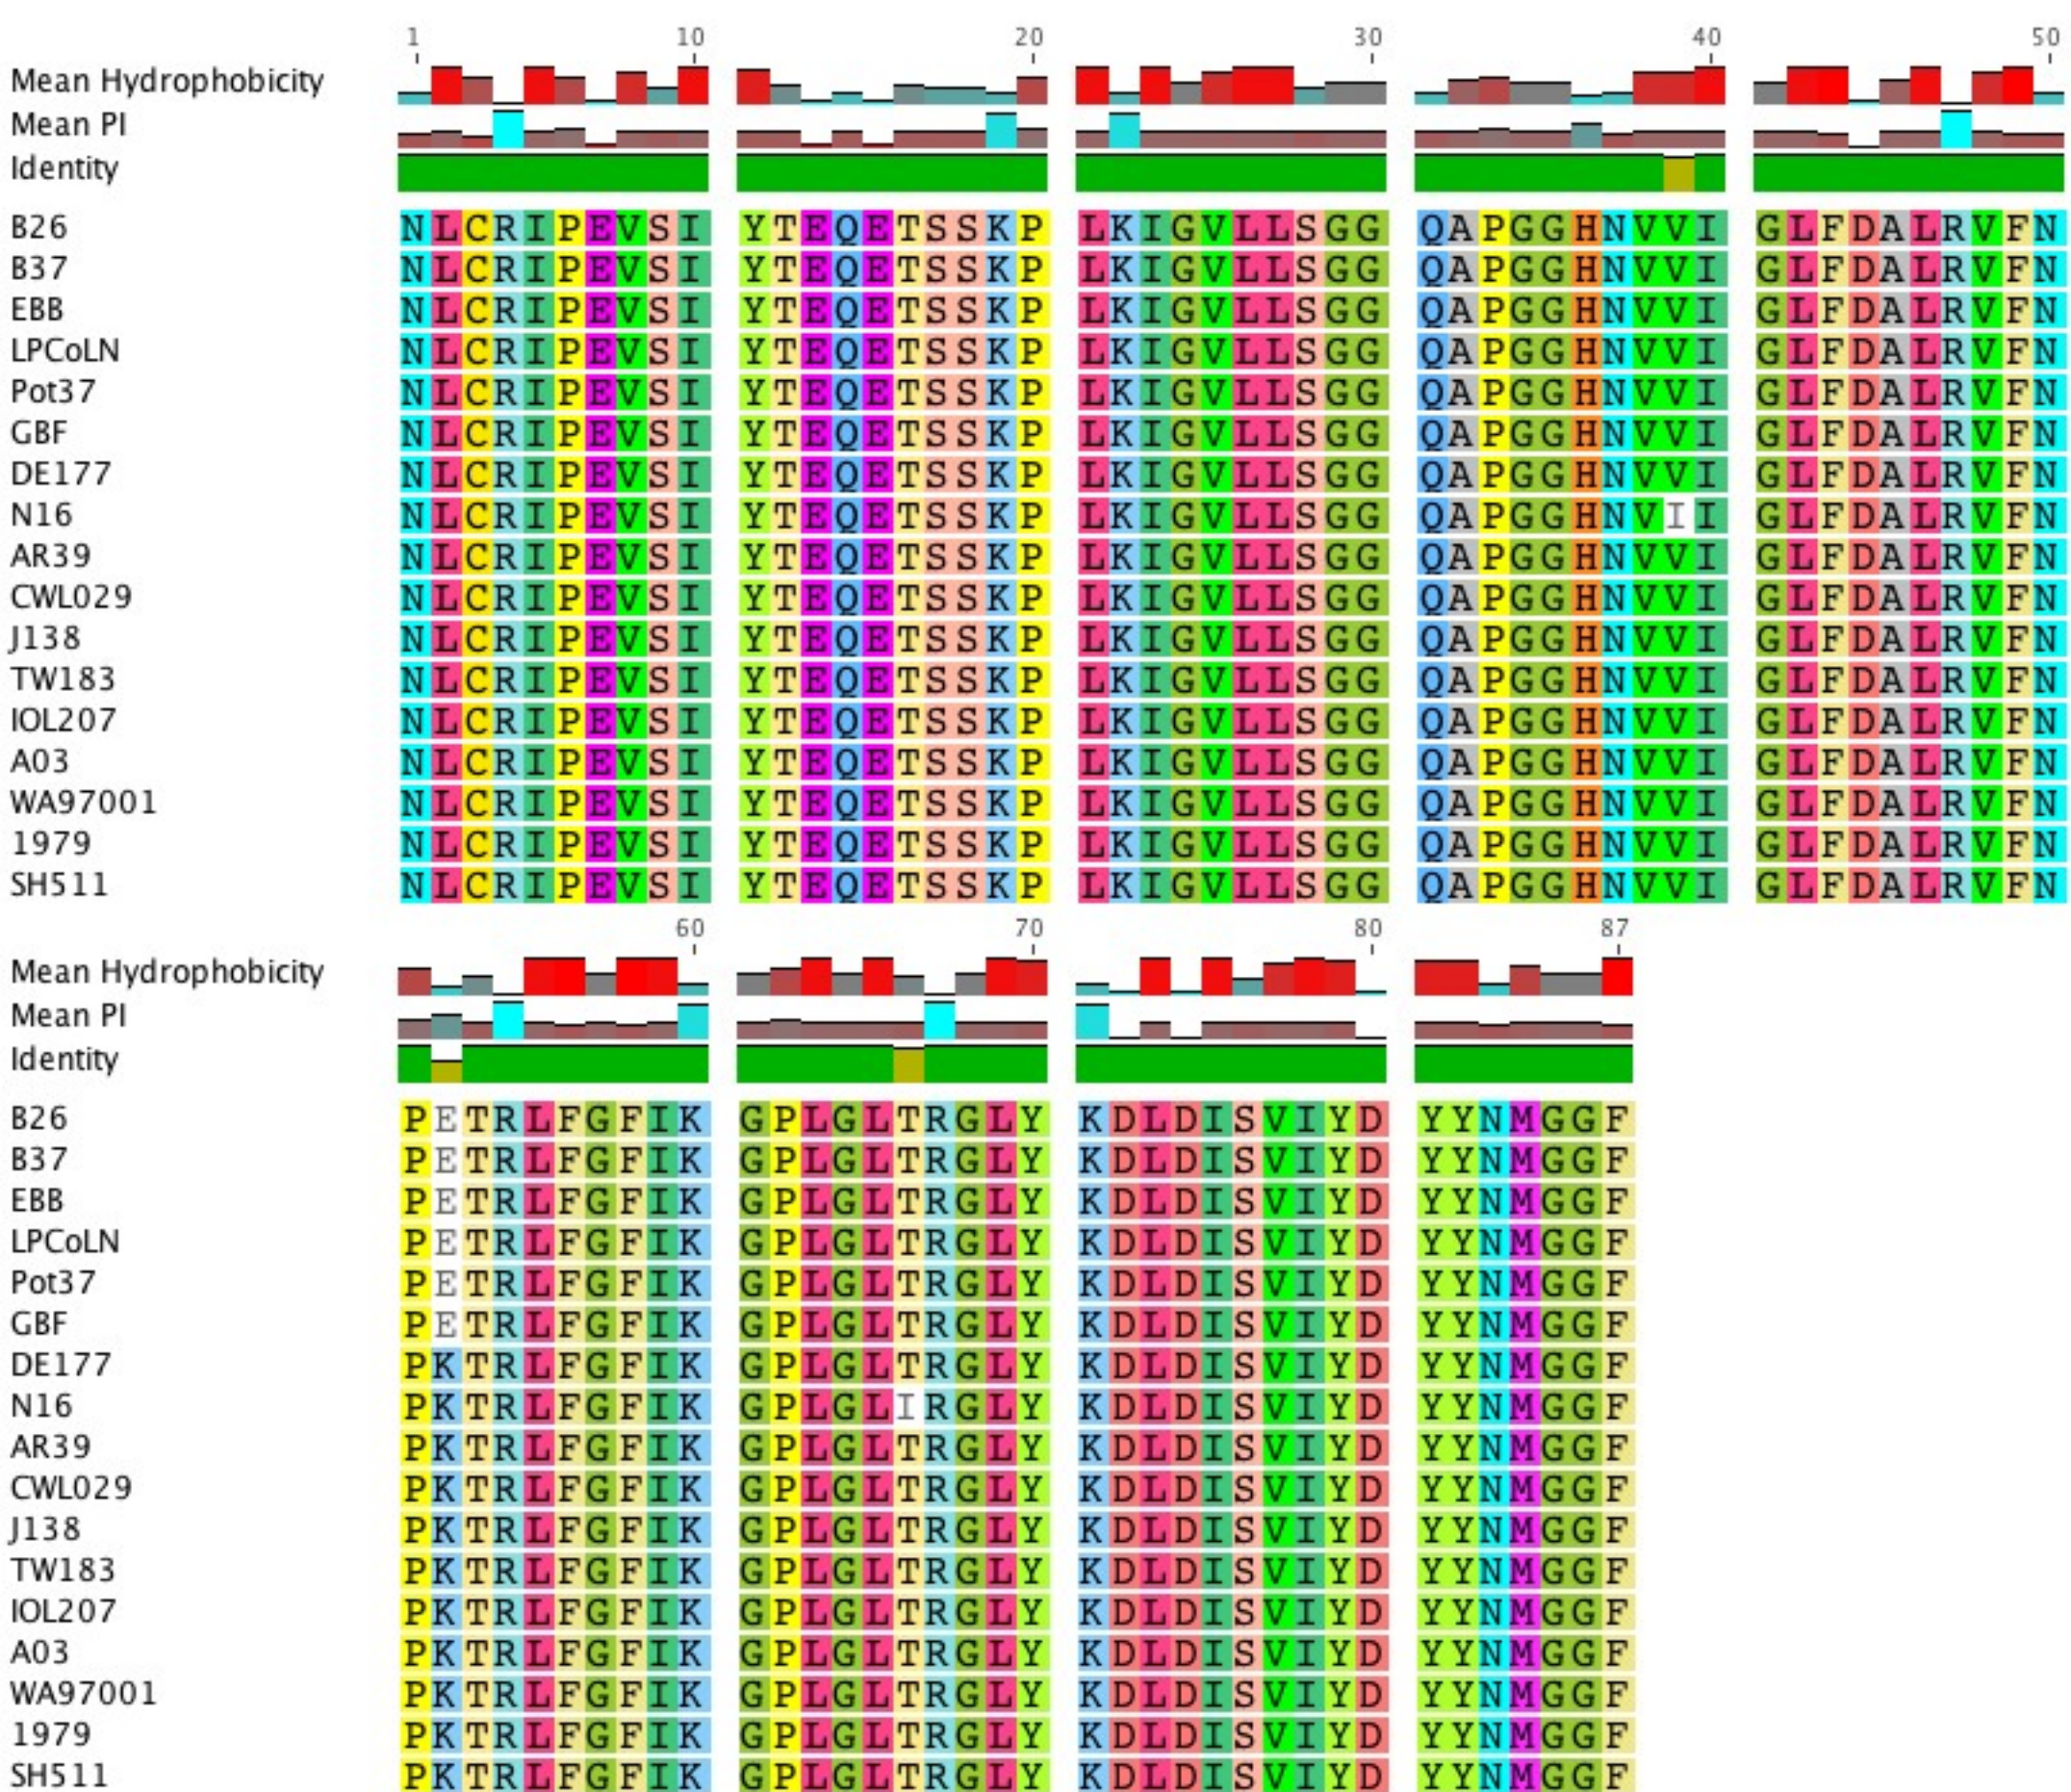

Supplement: ppat.1000903.s023.pdf [file ppat.1000903.s023.pdf]
