# Supplementary material for: Chlamydia pneumoniae Is Genetically Diverse in Animals and Appears to Have Crossed the Host Barrier to Humans on (At Least) Two Occasions
Source: PubMed Central journal article supplement (PMC2873915; doi:10.1371/journal.ppat.1000903), 2010-05-20
Supplement: ppat.1000903.s002.pdf [file ppat.1000903.s002.pdf]

|          |     |     |      |      |       |    |       |       |       |       |     |         |        |       |
|----------|-----|-----|------|------|-------|----|-------|-------|-------|-------|-----|---------|--------|-------|
|          | 1   | 10  | 20   | 30   | 40    | 50 | 60    |       |       |       |     |         |        |       |
| Identity |     |     |      |      |       |    |       |       |       |       |     |         |        |       |
| B26      | TTG | TAG | TTGT | TTTA | TTGGG | T  | GCTTT | GCTAA | TCGGA | ACAAT | AGG | TTTTTTT | ATTATA | AAGAA |
| LPCoLN   | TTG | TAG | TTGT | TTTA | TTGGG | T  | GCTTT | GCTAA | TCGGA | ACAAT | AGG | TTTTTTT | ATTATA | AAGAA |
| DE177    | TTG | TAG | TTGT | TTTA | TTGGG | T  | GCTTT | GCTAA | TCGGA | ACAAT | AGG | TTTTTTT | ATTATA | AAGAA |

|         |     |     |      |      |       |   |       |       |       |       |     |         |        |       |
|---------|-----|-----|------|------|-------|---|-------|-------|-------|-------|-----|---------|--------|-------|
| N16     | TTG | TAG | TTGT | TTTA | TTGGG | T | GCTTT | GCTAA | TCGGA | ACAAT | AGG | TTTTTTT | ATTATA | AAGAA |
| AR39    | TTG | TAG | TTGT | TTTA | TTGGG | T | GCTTT | GCTAA | TCGGA | ACAAT | AGG | TTTTTTT | ATTATA | AAGAA |
| CWL029  | TTG | TAG | TTGT | TTTA | TTGGG | T | GCTTT | GCTAA | TCGGA | ACAAT | AGG | TTTTTTT | ATTATA | AAGAA |
| J138    | TTG | TAG | TTGT | TTTA | TTGGG | T | GCTTT | GCTAA | TCGGA | ACAAT | AGG | TTTTTTT | ATTATA | AAGAA |
| TW183   | TTG | TAG | TTGT | TTTA | TTGGG | T | GCTTT | GCTAA | TCGGA | ACAAT | AGG | TTTTTTT | ATTATA | AAGAA |
| TOR1    | TTG | TAG | TTGT | TTTA | TTGGG | T | GCTTT | GCTAA | TCGGA | ACAAT | AGG | TTTTTTT | ATTATA | AAGAA |
| WA97001 | TTG | TAG | TTGT | TTTA | TTGGG | T | GCTTT | GCTAA | TCGGA | ACAAT | AGG | TTTTTTT | ATTATA | AAGAA |
| 1979    | TTG | TAG | TTGT | TTTA | TTGGG | T | GCTTT | GCTAA | TCGGA | ACAAT | AGG | TTTTTTT | ATTATA | AAGAA |
| SH511   | TTG | TAG | TTGT | TTTA | TTGGG | T | GCTTT | GCTAA | TCGGA | ACAAT | AGG | TTTTTTT | ATTATA | AAGAA |

|          |       |       |       |        |       |        |       |       |        |      |      |    |      |
|----------|-------|-------|-------|--------|-------|--------|-------|-------|--------|------|------|----|------|
|          | 70    | 80    | 90    | 100    | 110   | 120    |       |       |        |      |      |    |      |
| Identity |       |       |       |        |       |        |       |       |        |      |      |    |      |
| B26      | AACCT | GCCGA | AATTC | CAGACT | ATCGA | ATTCAC | GATCA | TTAAT | AGAAAT | CGCG | AAAG | CC | TTTG |
| LPCoLN   | AACCT | GCCGA | AATTC | CAGACT | ATCGA | ATTCAC | GATCA | TTAAT | AGAAAT | CGCG | AAAG | CC | TTTG |
| DE177    | AACCT | GCCGA | AATTC | CAGACT | ATCGA | ATTCAC | GATCA | TTAAT | AGAAAT | CGCG | AAAG | CC | TTTG |
| N16      | AACCT | GCCGA | AATTC | CAGACT | ATCGA | ATTCAC | GATCA | TTAAT | AGAAAT | CGCG | AAAG | CC | TTTG |
| AR39     | AACCT | GCCGA | AATTC | CAGACT | ATCGA | ATTCAC | GATCA | TTAAT | AGAAAT | CGCG | AAAG | CC | TTTG |
| CWL029   | AACCT | GCCGA | AATTC | CAGACT | ATCGA | ATTCAC | GATCA | TTAAT | AGAAAT | CGCG | AAAG | CC | TTTG |
| J138     | AACCT | GCCGA | AATTC | CAGACT | ATCGA | ATTCAC | GATCA | TTAAT | AGAAAT | CGCG | AAAG | CC | TTTG |
| TW183    | AACCT | GCCGA | AATTC | CAGACT | ATCGA | ATTCAC | GATCA | TTAAT | AGAAAT | CGCG | AAAG | CC | TTTG |
| TOR1     | AACCT | GCCGA | AATTC | CAGACT | ATCGA | ATTCAC | GATCA | TTAAT | AGAAAT | CGCG | AAAG | CC | TTTG |
| WA97001  | AACCT | GCCGA | AATTC | CAGACT | ATCGA | ATTCAC | GATCA | TTAAT | AGAAAT | CGCG | AAAG | CC | TTTG |
| 1979     | AACCT | GCCGA | AATTC | CAGACT | ATCGA | ATTCAC | GATCA | TTAAT | AGAAAT | CGCG | AAAG | CC | TTTG |
| SH511    | AACCT | GCCGA | AATTC | CAGACT | ATCGA | ATTCAC | GATCA | TTAAT | AGAAAT | CGCG | AAAG | CC | TTTG |

|          |       |        |     |         |     |         |     |          |     |         |     |         |
|----------|-------|--------|-----|---------|-----|---------|-----|----------|-----|---------|-----|---------|
|          | 130   | 140    | 150 | 160     | 170 | 180     |     |          |     |         |     |         |
| Identity |       |        |     |         |     |         |     |          |     |         |     |         |
| B26      | CTTAC | CGGTGG | GAA | TGACTCA | TTT | GGGGATT | CTG | TTTTTTGA | ACT | GATTGAC | GAG | TTAGATA |
| LPCoLN   | CTTAC | CGGTGG | GAA | TGACTCA | TTT | GGGGATT | CTG | TTTTTTGA | ACT | GATTGAC | GAG | TTAGATA |
| DE177    | CTTAC | CGGTGG | GAA | TGACTCA | TTT | GGGGATT | CTG | TTTTTTGA | ACT | GATTGAC | GAG | TTAGATA |
| N16      | CTTAC | CGGTGG | GAA | TGACTCA | TTT | GGGGATT | CTG | TTTTTTGA | ACT | GATTGAC | GAG | TTAGATA |
| AR39     | CTTAC | CGGTGG | GAA | TGACTCA | TTT | GGGGATT | CTG | TTTTTTGA | ACT | GATTGAC | GAG | TTAGATA |
| CWL029   | CTTAC | CGGTGG | GAA | TGACTCA | TTT | GGGGATT | CTG | TTTTTTGA | ACT | GATTGAC | GAG | TTAGATA |
| J138     | CTTAC | CGGTGG | GAA | TGACTCA | TTT | GGGGATT | CTG | TTTTTTGA | ACT | GATTGAC | GAG | TTAGATA |
| TW183    | CTTAC | CGGTGG | GAA | TGACTCA | TTT | GGGGATT | CTG | TTTTTTGA | ACT | GATTGAC | GAG | TTAGATA |
| TOR1     | CTTAC | CGGTGG | GAA | TGACTCA | TTT | GGGGATT | CTG | TTTTTTGA | ACT | GATTGAC | GAG | TTAGATA |
| WA97001  | CTTAC | CGGTGG | GAA | TGACTCA | TTT | GGGGATT | CTG | TTTTTTGA | ACT | GATTGAC | GAG | TTAGATA |
| 1979     | CTTAC | CGGTGG | GAA | TGACTCA | TTT | GGGGATT | CTG | TTTTTTGA | ACT | GATTGAC | GAG | TTAGATA |
| SH511    | CTTAC | CGGTGG | GAA | TGACTCA | TTT | GGGGATT | CTG | TTTTTTGA | ACT | GATTGAC | GAG | TTAGATA |

|          |                                                                                     |                                                                                      |                                                                                       |                                                                                       |                                                                                       |                                                                                       |
|----------|-------------------------------------------------------------------------------------|--------------------------------------------------------------------------------------|---------------------------------------------------------------------------------------|---------------------------------------------------------------------------------------|---------------------------------------------------------------------------------------|---------------------------------------------------------------------------------------|
| Identity |      |      |      |      |      |      |
| B26      | CGACTTCTTC                                                                          | TATCACTCGT                                                                           | GAAGGAACTG                                                                            | ATGCAGATCA                                                                            | ACGTCCTATC                                                                            | TTTGTGAATG                                                                            |
| LPCoLN   | CGACTTCTTC                                                                          | TATCACTCGT                                                                           | GAAGGAACTG                                                                            | ATGCAGATCA                                                                            | ACGTCCTATC                                                                            | TTTGTGAATG                                                                            |
| DE177    | CGACTTCTTC                                                                          | TATCACTCGT                                                                           | GAAGGAACTG                                                                            | ATGCAGATCA                                                                            | ACGTCCTATC                                                                            | TTTGTGAGTG                                                                            |
| N16      | CGACTTCTTC                                                                          | TATCACTCGT                                                                           | GAAGGAACTG                                                                            | ATGCAGATCA                                                                            | ACGTCCTATC                                                                            | TTTGTGAATG                                                                            |
| AR39     |                                                                                     |                                                                                      |                                                                                       |                                                                                       |                                                                                       |                                                                                       |
| CWL029   |                                                                                     |                                                                                      |                                                                                       |                                                                                       |                                                                                       |                                                                                       |
| J138     |                                                                                     |                                                                                      |                                                                                       |                                                                                       |                                                                                       |                                                                                       |
| TW183    |                                                                                     |                                                                                      |                                                                                       |                                                                                       |                                                                                       |                                                                                       |
| TOR1     |                                                                                     |                                                                                      |                                                                                       |                                                                                       |                                                                                       |                                                                                       |
| WA97001  |                                                                                     |                                                                                      |                                                                                       |                                                                                       |                                                                                       |                                                                                       |
| 1979     | CGACTTCTTC                                                                          | TATCACTCGT                                                                           | GAAGGAACTG                                                                            | ATGCAGATCA                                                                            | ACGTCCTATC                                                                            | TTTGTGAATG                                                                            |
| SH511    | CGACTTCTTC                                                                          | TATCACTCGT                                                                           | GAAGGAACTG                                                                            | ATGCAGATCA                                                                            | ACGTCCTATC                                                                            | TTTGTGAATG                                                                            |
| Identity |    |    |    |    |    |    |
| B26      | CTCAGGCAGA                                                                          | TTTCGAGAAG                                                                           | GCGATTGTAT                                                                            | ATTGTATAAA                                                                            | GTGTAAACAA                                                                            | ATTATAAAAT                                                                            |
| LPCoLN   | CTCAGGCAGA                                                                          | TTTCGAGAAG                                                                           | GCGATTGTAT                                                                            | ATTGTATAAA                                                                            | GTGTAAACAA                                                                            | ATTATAAAAT                                                                            |
| DE177    | CTCAGGCAGA                                                                          | TTTCGAAAAG                                                                           | GCGATTGTAT                                                                            | ATTGTATAAA                                                                            | GTGTAAACAA                                                                            | ATTATAAAAT                                                                            |
| N16      | CTCAGGCAGA                                                                          | TTTCGAGAAG                                                                           | GCGATTGTAT                                                                            | ATTGTATAAA                                                                            | GTGTAAACAA                                                                            | ATTATAAAAT                                                                            |
| AR39     |                                                                                     | TTCGAAAAG                                                                            | GCGATTGTAT                                                                            | ATTGTATAAA                                                                            | GTGTAAACAA                                                                            | ATTATAAAAT                                                                            |
| CWL029   |                                                                                     | TTCGAAAAG                                                                            | GCGATTGTAT                                                                            | ATTGTATAAA                                                                            | GTGTAAACAA                                                                            | ATTATAAAAT                                                                            |
| J138     |                                                                                     | TTCGAAAAG                                                                            | GCGATTGTAT                                                                            | ATTGTATAAA                                                                            | GTGTAAACAA                                                                            | ATTATAAAAT                                                                            |
| TW183    |                                                                                     | TTCGAAAAG                                                                            | GCGATTGTAT                                                                            | ATTGTATAAA                                                                            | GTGTAAACAA                                                                            | ATTATAAAAT                                                                            |
| TOR1     |                                                                                     | TTCGAAAAG                                                                            | GCGATTGTAT                                                                            | ATTGTATAAA                                                                            | GTGTAAACAA                                                                            | ATTATAAAAT                                                                            |
| WA97001  |                                                                                     | TTCGAAAAG                                                                            | GCGATTGTAT                                                                            | ATTGTATAAA                                                                            | GTGTAAACAA                                                                            | ATTATAAAAT                                                                            |
| 1979     | CTCAGGCAGA                                                                          | TTTCGAAAAG                                                                           | GCGATTGTAT                                                                            | ATTGTATAAA                                                                            | GTGTAAACAA                                                                            | ATTATAAAAT                                                                            |
| SH511    | CTCAGGCAGA                                                                          | TTTCGAAAAG                                                                           | GCGATTGTAT                                                                            | ATTGTATAAA                                                                            | GTGTAAACAA                                                                            | ATTATAAAAT                                                                            |
| Identity |  |  |  |  |  |  |
| B26      | GTATATCGAT                                                                          | CATTCATACC                                                                           | CCTACACCAG                                                                            | CGACACCTCT                                                                            | TTGCACGGAG                                                                            | GGGGAAATTT                                                                            |
| LPCoLN   | GTATATCGAT                                                                          | CATTCATACC                                                                           | CCTACACCAG                                                                            | CGACACCTCT                                                                            | TTGCACGGAG                                                                            | GGGGAAATTT                                                                            |
| DE177    | GTATATCGAT                                                                          | CATTCATACC                                                                           | CCTACACCAG                                                                            | CGACACCTCT                                                                            | TTGCACGGAG                                                                            | GGGGAAATTT                                                                            |
| N16      | GTATATCGAT                                                                          | CATTCATACC                                                                           | CCTACACCAG                                                                            | CGACACCTCT                                                                            | TTGCACGGAG                                                                            | GGGGAAATTT                                                                            |
| AR39     | GTATATCGAT                                                                          | CATTCATACC                                                                           | CCTACACCAG                                                                            | CGACACCTCT                                                                            | TTGCACGGAG                                                                            | GGGGAAATTT                                                                            |
| CWL029   | GTATATCGAT                                                                          | CATTCATACC                                                                           | CCTACACCAG                                                                            | CGACACCTCT                                                                            | TTGCACGGAG                                                                            | GGGGAAATTT                                                                            |
| J138     | GTATATCGAT                                                                          | CATTCATACC                                                                           | CCTACACCAG                                                                            | CGACACCTCT                                                                            | TTGCACGGAG                                                                            | GGGGAAATTT                                                                            |
| TW183    | GTATATCGAT                                                                          | CATTCATACC                                                                           | CCTACACCAG                                                                            | CGACACCTCT                                                                            | TTGCACGGAG                                                                            | GGGGAAATTT                                                                            |
| TOR1     | GTATATCGAT                                                                          | CATTCATACC                                                                           | CCTACACCAG                                                                            | CGACACCTCT                                                                            | TTGCACGGAG                                                                            | GGGGAAATTT                                                                            |
| WA97001  | GTATATCGAT                                                                          | CATTCATACC                                                                           | CCTACACCAG                                                                            | CGACACCTCT                                                                            | TTGCACGGAG                                                                            | GGGGAAATTT                                                                            |
| 1979     | GTATATCGAT                                                                          | CATTCATACC                                                                           | CCTACACCAG                                                                            | CGACACCTCT                                                                            | TTGCACGGAG                                                                            | GGGGAAATTT                                                                            |
| SH511    | GTATATCGAT                                                                          | CATTCATACC                                                                           | CCTACACCAG                                                                            | CGACACCTCT                                                                            | TTGCACGGAG                                                                            | GGGGAAATTT                                                                            |
| Identity |  |  |  |  |  |  |
| B26      | TTCCGGGTCT                                                                          | TGTAGATTCT                                                                           | GCAATTCAGA                                                                            | ATGATCTCGA                                                                            | GAGATTACTC                                                                            | ACAGTAAAGA                                                                            |
| LPCoLN   | TTCCGGGTCT                                                                          | TGTAGATTCT                                                                           | GCAATTCAGA                                                                            | ATGATCTCGA                                                                            | GAGATTACTC                                                                            | ACAGTAAAGA                                                                            |
| DE177    | TTCCAGGTCT                                                                          | TGTAGATTCT                                                                           | GCAATTCAGA                                                                            | ATGATCTCGA                                                                            | GAGATTACTC                                                                            | ACAGTAAAGA                                                                            |
| N16      | TTCCGGGTCT                                                                          | TGTAGATTCT                                                                           | GCAATTCAGA                                                                            | ATGATCTCGA                                                                            | GAGATTACTC                                                                            | ACAGTAAAGA                                                                            |
| AR39     | TTCCAGGTCT                                                                          | TGTAGATTCT                                                                           | GCAATTCAGA                                                                            | ATGATCTCGA                                                                            | GAGATTACTC                                                                            | ACAGTAAAGA                                                                            |
| CWL029   | TTCCAGGTCTC                                                                         | TGTAGATTCT                                                                           | GCAATTCAGA                                                                            | ATGATCTCGA                                                                            | GAGATTACTC                                                                            | ACAGTAAAGA                                                                            |
| J138     | TTCCAGGTCT                                                                          | TGTAGATTCT                                                                           | GCAATTCAGA                                                                            | ATGATCTCGA                                                                            | GAGATTACTC                                                                            | ACAGTAAAGA                                                                            |
| TW183    | TTCCAGGTCT                                                                          | TGTAGATTCT                                                                           | GCAATTCAGA                                                                            | ATGATCTCGA                                                                            | GAGATTACTC                                                                            | ACAGTAAAGA                                                                            |
| TOR1     | TTCCAGGTCT                                                                          | TGTAGATTCT                                                                           | GCAATTCAGA                                                                            | ATGATCTCGA                                                                            | GAGATTACTC                                                                            | ACAGTAAAGA                                                                            |
| WA97001  | TTCCAGGTCT                                                                          | TGTAGATTCT                                                                           | GCAATTCAGA                                                                            | ATGATCTCGA                                                                            | GAGATTACTC                                                                            | ACAGTAAAGA                                                                            |
| 1979     | TTCCAGGTCT                                                                          | TGTAGATTCT                                                                           | GCAATTCAGA                                                                            | ATGATCTCGA                                                                            | GAGATTACTC                                                                            | ACAGTAAAGA                                                                            |
| SH511    | TTCCAGGTCT                                                                          | TGTAGATTCT                                                                           | GCAATTCAGA                                                                            | ATGATCTCGA                                                                            | GAGATTACTC                                                                            | ACAGTAAAGA                                                                            |

|          | 430        | 440        | 450        | 460        | 470        | 480        |
|----------|------------|------------|------------|------------|------------|------------|
| Identity |            |            |            |            |            |            |
| B26      | AAAGACCTGA | CATCATCCGG | GAGTATTTGC | GAGCAGGAGG | TAGTCTTGTT | ACAACATACC |
| LPCoLN   | AAAGACCTGA | CATCATCCGG | GAGTATTTGC | GAGCAGGAGG | TAGTCTTGTT | ACAACATACC |
| DE177    | AAAGACCTGA | TATCATCCGG | GAGTATTTGC | GAGCAGGAGG | TAGTCTTGTT | ACAACATACC |
| N16      | AAAGACCTGA | CATCATCCGG | GAGTATTTGC | GAGCAGGAGG | TAGTCTTGTT | ACAACATACC |
| AR39     | AAAGACCTGA | TATCATCCGG | GAGTATTTGC | GAGCAGGAGG | TAGTCTTGTT | ACAACATACC |
| CWL029   | AAAGACCTGA | TATCATCCGG | GAGTATTTGC | GAGCAGGAGG | TAGTCTTGTT | ACAACATACC |
| J138     | AAAGACCTGA | TATCATCCGG | GAGTATTTGC | GAGCAGGAGG | TAGTCTTGTT | ACAACATACC |
| TW183    | AAAGACCTGA | TATCATCCGG | GAGTATTTGC | GAGCAGGAGG | TAGTCTTGTT | ACAACATACC |
| TOR1     | AAAGACCTGA | TATCATCCGG | GAGTATTTGC | GAGCAGGAGG | TAGTCTTGTT | ACAACATACC |
| WA97001  | AAAGACCTGA | TATCATCCGG | GAGTATTTGC | GAGCAGGAGG | TAGTCTTGTT | ACAACATACC |
| 1979     | AAAGACCTGA | TATCATCCGG | GAGTATTTGC | GAGCAGGAGG | TAGTCTTGTT | ACAACATACC |
| SH511    | AAAGACCTGA | TATCATCCGG | GAGTATTTGC | GAGCAGGAGG | TAGTCTTGTT | ACAACATACC |

|          | 490        | 500        | 510        | 520        | 530        | 540        |
|----------|------------|------------|------------|------------|------------|------------|
| Identity |            |            |            |            |            |            |
| B26      | CTAAGGAAGG | TCGGAGATTG | CGCTCCCCAG | AACAGTTAAG | AGTTCTGGAT | GATTTAGTGC |
| LPCoLN   | CTAAGGAAGG | TCGGAGATTG | CGCTCCCCAG | AACAGTTAAG | AGTTCTGGAT | GATTTAGTGC |
| DE177    | CTAAGGAAGG | TCGGAGATTG | CGCTCCCCAG | AACAGTTAAG | AGTTCTGGAT | GATTTAGTGC |
| N16      | CTAAGGAAGG | TCGGAGATTG | CGCTCCCCAG | AACAGTTAAG | AGTTCTGGAT | GATTTAGTGC |
| AR39     | CTAAGGAAGG | TCAGAGATTG | CGCTCCCCAG | AACAGTTAAG | AGTTCTGGAT | GATTTAGTGC |
| CWL029   | CTAAGGAAGG | TCAGAGATTG | CGCTCCCCAG | AACAGTTAAG | AGTTCTGGAT | GATTTAGTGC |
| J138     | CTAAGGAAGG | TCAGAGATTG | CGCTCCCCAG | AACAGTTAAG | AGTTCTGGAT | GATTTAGTGC |
| TW183    | CTAAGGAAGG | TCAGAGATTG | CGCTCCCCAG | AACAGTTAAG | AGTTCTGGAT | GATTTAGTGC |
| TOR1     | CTAAGGAAGG | TCAGAGATTG | CGCTCCCCAG | AACAGTTAAG | AGTTCTGGAT | GATTTAGTGC |
| WA97001  | CTAAGGAAGG | TCAGAGATTG | CGCTCCCCAG | AACAGTTAAG | AGTTCTGGAT | GATTTAGTGC |
| 1979     | CTAAGGAAGG | TCAGAGATTG | CGCTCCCCAG | AACAGTTAAG | AGTTCTGGAT | GATTTAGTGC |
| SH511    | CTAAGGAAGG | TCAGAGATTG | CGCTCCCCAG | AACAGTTAAG | AGTTCTGGAT | GATTTAGTGC |

|          | 550        | 560        | 570        | 580        | 590        | 600        |
|----------|------------|------------|------------|------------|------------|------------|
| Identity |            |            |            |            |            |            |
| B26      | AAAGCTATCC | AAATCACCTG | CATGCGATTG | AACTTGATTG | TGATGCAATC | CCTCAAGATT |
| LPCoLN   | AAAGCTATCC | AAATCACCTG | CATGCGATTG | AACTTGATTG | TGATGCAATC | CCTCAAGATT |
| DE177    | AAAGCTATCC | AAATCACCTA | CATGCGATTG | AACTTGATTG | TGATGCAATC | CCTCAAGATT |
| N16      | AAAGCTATCC | AAATCACCTG | CATGCGATTG | AACTTGATTG | TGATGCAATC | CCTCAAGATT |
| AR39     | AAAGCTATCC | AAATCACCTA | CATGCGATTG | AACTTGATTG | TGGTGCAATC | CCTCAAGATT |
| CWL029   | AAAGCTATCC | AAATCACCTA | CATGCGATTG | AACTTGATTG | TGGTGCAATC | CCTCAAGATT |
| J138     | AAAGCTATCC | AAATCACCTA | CATGCGATTG | AACTTGATTG | TGGTGCAATC | CCTCAAGATT |
| TW183    | AAAGCTATCC | AAATCACCTA | CATGCGATTG | AACTTGATTG | TGGTGCAATC | CCTCAAGATT |
| TOR1     | AAAGCTATCC | AAATCACCTA | CATGCGATTG | AACTTGATTG | TGGTGCAATC | CCTCAAGATT |
| WA97001  | AAAGCTATCC | AAATCACCTA | CATGCGATTG | AACTTGATTG | TGGTGCAATC | CCTCAAGATT |
| 1979     | AAAGCTATCC | AAATCACCTA | CATGCGATTG | AACTTGATTG | TGGTGCAATC | CCTCAAGATT |
| SH511    | AAAGCTATCC | AAATCACCTA | CATGCGATTG | AACTTGATTG | TGGTGCAATC | CCTCAAGATT |

|          | 610        | 620         | 630         | 640        | 650         | 660        |
|----------|------------|-------------|-------------|------------|-------------|------------|
| Identity |            |             |             |            |             |            |
| B26      | TGATCGGAGC | TACCTATAATC | ATCACGTTTCG | CCGATTTTTC | CACCTATAATT | CTCTCTTTAA |
| LPCoLN   | TGATCGGAGC | TACCTATAATC | ATCACGTTTCG | CCGATTTTTC | CACCTATAATT | CTCTCTTTAA |
| DE177    | TGATCGGAGC | CACCTATAATC | ATCACGTTTCG | CCGATTTTTC | CACCTATAATT | CTCTCTTTAA |
| N16      | TGATCGGAGC | TACCTATAATC | ATCACGTTTCG | CCGATTTTTC | CACCTATAATT | CTCTCTTTAA |
| AR39     | TGATCGGAGC | CACCTATAATC | ATCACGTTTCG | CCGATTTTTC | CRCTATAATT  | CTCTCTTTAA |
| CWL029   | TGATCGGAGC | CACCTATAATC | ATCACGTTTCG | CCGATTTTTC | CACCTATAATT | CTCTCTTTAA |
| J138     | TGATCGGAGC | CACCTATAATC | ATCACGTTTCG | CCGATTTTTC | CACCTATAATT | CTCTCTTTAA |
| TW183    | TGATCGGAGC | CACCTATAATC | ATCACGTTTCG | CCGATTTTTC | CGCCTATAATT | CTCTCTTTAA |
| TOR1     | TGATCGGAGC | CACCTATAATC | ATCACGTTTCG | CCGATTTTTC | CACCTATAATT | CTCTCTTTAA |
| WA97001  | TGATCGGAGC | CACCTATAATC | ATCACGTTTCG | CCGATTTTTC | CACCTATAATT | CTCTCTTTAA |
| 1979     | TGATCGGAGC | CACCTATAATC | ATCACGTTTCG | CCGATTTTTC | CACCTATAATT | CTCTCTTTAA |
| SH511    | TGATCGGAGC | CACCTATAATC | ATCACGTTTCG | CCGATTTTTC | CACCTATAATT | CTCTCTTTAA |

|          | 670        | 680        | 690        | 700        | 710        | 720        |
|----------|------------|------------|------------|------------|------------|------------|
| Identity |            |            |            |            |            |            |
| B26      | GAAGCTACCA | AGCCAAATTC | CCCTCCGATG | ATACATGGGG | GATTTGGTTT | GGATCTATTG |
| LPCoLN   | GAAGCTACCA | AGCCAAATTC | CCCTCCGATG | ATACATGGGG | GATTTGGTTT | GGATCTATTG |
| DE177    | GAAGCTACCA | AGCCAAATTC | CCCTCCGATG | ATACATGGGG | GATTTGGTTT | GGATCTATTG |
| N16      | GAAGCTACCA | AGCCAAATTC | CCCTCCGATG | ATACATGGGG | GATTTGGTTT | GGATCTATTG |
| AR39     | GAAGCTACCA | AGCCAAATTC | CCCTCCGATG | ATACATGGGG | GATTTGGTTT | GGATCTATTG |
| CWL029   | GAAGCTACCA | AGCCAAATTC | CCCTCCGATG | ATACATGGGG | GATTTGGTTT | GGATCTATTG |
| J138     | GAAGCTACCA | AGCCAAATTC | CCCTCCGATG | ATACATGGGG | GATTTGGTTT | GGATCTATTG |
| TW183    | GAAGCTACCA | AGCCAAATTC | CCCTCCGATG | ATACATGGGG | GATTTGGTTT | GGATCTATTG |
| TOR1     | GAAGCTACCA | AGCCAAATTC | CCCTCCGATG | ATACATGGGG | GATTTGGTTT | GGATCTATTG |
| WA97001  | GAAGCTACCA | AGCCAAATTC | CCCTCCGATG | ATACATGGGG | GATTTGGTTT | GGATCTATTG |
| 1979     | GAAGCTACCA | AGCCAAATTC | CCCTCCGATG | ATACATGGGG | GATTTGGTTT | GGATCTATTG |
| SH511    | GAAGCTACCA | AGCCAAATTC | CCCTCCGATG | ATACATGGGG | GATTTGGTTT | GGATCTATTG |

|          | 730        | 740        | 750        | 760        | 770        | 780        |
|----------|------------|------------|------------|------------|------------|------------|
| Identity |            |            |            |            |            |            |
| B26      | ACGATCCTGT | TATAGCAGAT | CGTTTTCAAG | CAGTCATATC | ATTTTTAAAA | GATCATGGAT |
| LPCoLN   | ACGATCCTGT | TATAGCAGAT | CGTTTTCAAG | CAGTCATATC | ATTTTTAAAA | GATCATGGAT |
| DE177    | ACGATCCTGT | TATAGCAGAT | CGTTTTCAAG | CAGTCATATC | ATTTTTAAAA | GATCATGGAT |
| N16      | ACGATCCTGT | TATAGCAGAT | CGTTTTCAAG | CAGTCATATC | ATTTTTAAAA | GATCATGGAT |
| AR39     | ACGATCCTGT | T-----     | -----CAAG  | CAGTCATATC | ATTTTTAAAA | GATCATGGAT |
| CWL029   | ACGATCCTGT | T-----     | -----CAAG  | CAGTCATATC | ATTTTTAAAA | GATCATGGAT |
| J138     | ACGATCCTGT | T-----     | -----CAAG  | CAGTCATATC | ATTTTTAAAA | GATCATGGAT |
| TW183    | ACGATCCTGT | T-----     | -----CAAG  | CAGTCATATC | ATTTTTAAAA | GATCATGGAT |
| TOR1     | ACGATCCTGT | T-----     | -----CAAG  | CAGTCATATC | ATTTTTAAAA | GATCATGGAT |
| WA97001  | ACGATCCTGT | T-----     | -----CAAG  | CAGTCATATC | ATTTTTAAAA | GATCATGGAT |
| 1979     | ACGATCCTGT | TATAGCAGAT | CGTTTTCAAG | CAGTCATATC | ATTTTTAAAA | GATCATGGAT |
| SH511    | ACGATCCTGT | TATAGCAGAT | CGTTTTCAAG | CAGTCATATC | ATTTTTAAAA | GATCATGGAT |

| Identity | 790        | 800        | 810        | 820        | 830         | 833 |
|----------|------------|------------|------------|------------|-------------|-----|
| B26      | TTGCTCTTCC | CTCGACCTTA | GCTCAAGATC | CTTTGCTTTG | TACTAA CAAG | TAA |
| LPCoLN   | TTGCTCTTCC | CTCGACCTTA | GCTCAAGATC | CTTTGCTTTG | TACTAA CAAG | TAA |
| DE177    | TTGCTCTTCC | CTCGACCTTA | GCTCAAGATC | CTTTGCTTTG | TACTAA CAAG | TAA |
| N16      | TTGCTCTTCC | CTCGACCTTA | GCTCAAGATC | CTTTGCTTTG | TACTA       |     |
| AR39     | TTGCTCTTCC | CTCGACCTTA | GCTCAAGATC | CTTTGCTTTG | TACTAA CAAG | TAA |
| CWL029   | TTGCTCTTCC | CTCGACCTTA | GCTCAAGATC | CTTTGCTTTG | TACTAA CAAG | TAA |
| J138     | TTGCTCTTCC | CTCGACCTTA | GCTCAAGATC | CTTTGCTTTG | TACTAA CAAG | TAA |
| TW183    | TTGCTCTTCC | CTCGACCTTA | GCTCAAGATC | CTTTGCTTTG | TACTAA CAAG | TAA |
| TOR1     | TTGCTCTTCC | CTCGACCTTA | GCTCAAGATC | CTTTGCTTTG | TACTAA CAAG | TAA |
| WA97001  | TTGCTCTTCC | CTCGACCTTA | GCTCAAGATC | CTTTGCTTTG | TACTAA CAAG | TAA |
| 1979     | TTGCTCTTCC | CTCGACCTTA | GCTCAAGATC | CTTTGCTTTG | TACTAA CAAG | TAA |
| SH511    | TTGCTCTTCC | CTCGACCTTA | GCTCAAGATC | CTTTGCTTTG | TACTAA CAAG | TAA |
