# Supplementary material for: Chlamydia pneumoniae Is Genetically Diverse in Animals and Appears to Have Crossed the Host Barrier to Humans on (At Least) Two Occasions
Source: PubMed Central journal article supplement (PMC2873915; doi:10.1371/journal.ppat.1000903), 2010-05-20
Supplement: ppat.1000903.s006.pdf [file ppat.1000903.s006.pdf]

| Identity | 1           | 10           | 20  | 30          | 40             | 50          |
|----------|-------------|--------------|-----|-------------|----------------|-------------|
| LPCoLN   | TTA TAGAGAT | CAG CAA T    | AAC | TCCG CATCCT | CA G T TAA CAC | AG CATCAGGA |
| DE177    | TTA TAGAGAT | CAG CAA TCAC |     | TCCG CATCCT | CAAT TAA CAC   | AG CATCAGGA |
| AR39     | TTA TAGAGAT | CAG CAA TCAC |     | TCCG CATCCT | CAAT TAA CAC   | AG CATCAGGA |
| CWL029   | TTA TAGAGAT | CAG CAA TCAC |     | TCCG CATCCT | CAAT TAA CAC   | AG CATCAGGA |
| J138     | TTA TAGAGAT | CAG CAA TCAC |     | TCCG CATCCT | CAAT TAA CAC   | AG CATCAGGA |
| TW183    | TTA TAGAGAT | CAG CAA TCAC |     | TCCG CATCCT | CAAT TAA CAC   | AG CATCAGGA |
| WA97001  | TTA TAGAGAT | CAG CAA TCAC |     | TCCG CATCCT | CAAT TAA CAC   | AG CATCAGGA |
| SH511    | TTA TAGAGAT | CAG CAA TCAC |     | TCCG CATCCT | T AAT TAA CAC  | AG CATCAGGA |
| TOR1     | TTA TAGAGAT | CAG CAA TCAC |     | TCCG CATCCT | CAAT TAA CAC   | AG CATCAGGA |

| Identity | 60            | 70           | 80          | 90          | 100            |
|----------|---------------|--------------|-------------|-------------|----------------|
| LPCoLN   | AAA CTA TA TC | CCGG TGG TGG | CGGT AT T   | TG TACCTCCT | TA A TC G TTGA |
| DE177    | AAA CTA TA TC | CCGG TGG TGG | CGGT AT T   | TG TACCTCCT | TAGTCATTGA     |
| AR39     | AAA CTA TA TC | CCGG TGG TGG | CGGT ATCATG | TG TACCTCCT | TAGTCATTGA     |
| CWL029   | AAA CTA TA TC | CCGG TGG TGG | CGGT ATCATG | TG TACCTCCT | TAGTCATTGA     |
| J138     | AAA CTA TA TC | CCGG TGG TGG | CGGT ATCATG | TG TACCTCCT | TAGTCATTGA     |
| TW183    | AAA CTA TA TC | CCGG TGG TGG | CGGT ATCATG | TG TACCTCCT | TAGTCATTGA     |
| WA97001  | AAA CTA TA TC | CCGG TGG TGG | CGGT ATCATG | TG TACCTCCT | TAGTCATTGA     |
| SH511    | AAA CTA TA TC | CCGG TGG TGG | CGGT ATCATG | TG TACCTCCT | TAGTCATTGA     |
| TOR1     | AAA CTA TA TC | CCGG TGG TGG | CGGT ATCATG | TG TACCTCCT | TAGTCATTGA     |

| Identity | 110          | 120        | 130         | 140             | 150        |
|----------|--------------|------------|-------------|-----------------|------------|
| LPCoLN   | GAA CAA TCCC | AAAGGTCTTA | TCTTTAA CAA | TAA C AC G G CA | GCACTTAGCG |
| DE177    | GAA CAA TCCC | AAAGGTCTTA | TCTTTAA CAA | TAA C AC G G CA | GCACTTAGCG |
| AR39     | GAA CAA TCCC | AAAGGTCTTA | TCTTTAA CAA | TAAAACGGCA      | GCACTTAGCG |
| CWL029   | GAA CAA TCCC | AAAGGTCTTA | TCTTTAA CAA | TAAAACGGCA      | GCACTTAGCG |
| J138     | GAA CAA TCCC | AAAGGTCTTA | TCTTTAA CAA | TAAAACGGCA      | GCACTTAGCG |
| TW183    | GAA CAA TCCC | AAAGGTCTTA | TCTTTAA CAA | TAAAACGGCA      | GCACTTAGCG |
| WA97001  | GAA CAA TCCC | AAAGGTCTTA | TCTTTAA CAA | TAAAACGGCA      | GCACTTAGCG |
| SH511    | GAA CAA TCCC | AAAGGTCTTA | TCTTTAA CAA | TAAAACGGCA      | GCACTTAGCG |
| TOR1     | GAA CAA TCCC | AAAGGTCTTA | TCTTTAA CAA | TAAAACGGCA      | GCACTTAGCG |

| Identity | 160            | 170         | 180           | 190          | 200        |
|----------|----------------|-------------|---------------|--------------|------------|
| LPCoLN   | G A G GAG CTAT | ACA CACGAGA | TCTTT T A T T | TC CAAAA TAA | CGGTCCGACA |
| DE177    | GCGGAGCTAT     | ACA CACGAGA | TCTTTCA TCT   | TC CAAAA TAA | CGGTCCGACA |
| AR39     | GCGGAGCTAT     | ACA CACGAGA | TCTTTCA TCT   | TC CAAAA TAA | CGGTCCGACA |
| CWL029   | GCGGAGCTAT     | ACA CACGAGA | TCTTTCA TCT   | TC CAAAA TAA | CGGTCCGACA |
| J138     | GCGGAGCTAT     | ACA CACGAGA | TCTTTCA TCT   | TC CAAAA TAA | CGGTCCGACA |
| TW183    | GCGGAGCTAT     | ACA CACGAGA | TCTTTCA TCT   | TC CAAAA TAA | CGGTCCGACA |
| WA97001  | GCGGAGCTAT     | ACA CACGAGA | TCTTTCA TCT   | TC CAAAA TAA | CGGTCCGACA |
| SH511    | GCGGAGCTAT     | ACA CACGAGA | TCTTTCA TCT   | TC CAAAA TAA | CGGTCCGACA |
| TOR1     | GCGGAGCTAT     | ACA CACGAGA | TCTTTCA TCT   | TC CAAAA TAA | CGGTCCGACA |

| Identity | 210          | 220        | 230        | 240        | 250        |
|----------|--------------|------------|------------|------------|------------|
| LPCoLN   | GCA TTTA TTA | ATAACTCTGC | GACTTCAGGA | GGGGCTCTCA | TCAATCTTTC |
| DE177    | GCA TTTA TTA | ATAACTCTGC | GACTTCAGGA | GGGGCTCTCA | TCAATCTTTC |
| AR39     | GCA TTTA TTA | ATAACTCTGC | GACTTCAGGA | GGGGCTCTCA | TCAATCTTTC |
| CWL029   | GCA TTTA TTA | ATAACTCTGC | GACTTCAGGA | GGGGCTCTCA | TCAATCTTTC |
| J138     | GCA TTTA TTA | ATAACTCTGC | GACTTCAGGA | GGGGCTCTCA | TCAATCTTTC |
| TW183    | GCA TTTA TTA | ATAACTCTGC | GACTTCAGGA | GGGGCTCTCA | TCAATCTTTC |
| WA97001  | GCA TTTA TTA | ATAACTCTGC | GACTTCAGGA | GGGGCTCTCA | TCAATCTTTC |
| SH511    | GCA TTTA TTA | ATAACTCTGC | GACTTCAGGA | GGGGCTCTCA | TCAATCTTTC |
| TOR1     | GCA TTTA TTA | ATAACTCTGC | GACTTCAGGA | GGGGCTCTCA | TCAATCTTTC |

| Identity | 260         | 270        | 280         | 290        | 300         |
|----------|-------------|------------|-------------|------------|-------------|
| LPCoLN   | TGG TATAGGA | AGTACTCCTC | AAAA TTTCTT | CCTCTCTGCA | GACTTACGGCG |
| DE177    | TGG TATAGGA | AGTACTCCTC | AAAA TTTCTT | CCTCTCTGCA | GACTTACGGCG |
| AR39     | TGG TATAGGA | AGTACTCCTC | AAAA TTTCTT | CCTCTCTGCA | GACTTACGGCG |
| CWL029   | TGG TATAGGA | AGTACTCCTC | AAAA TTTCTT | CCTCTCTGCA | GACTTACGGCG |
| J138     | TGG TATAGGA | AGTACTCCTC | AAAA TTTCTT | CCTCTCTGCA | GACTTACGGCG |
| TW183    | TGG TATAGGA | AGTACTCCTC | AAAA TTTCTT | CCTCTCTGCA | GACTTACGGCG |
| WA97001  | TGG TATAGGA | AGTACTCCTC | AAAA TTTCTT | CCTCTCTGCA | GACTTACGGCG |
| SH511    | TGG TATAGGA | AGTACTCCTC | AAAA TTTCTT | CCTCTCTGCA | GACTTACGGCG |
| TOR1     | TGG TATAGGA | AGTACTCCTC | AAAA TTTCTT | CCTCTCTGCA | GACTTACGGCG |

| Identity | 310          | 320           | 330          | 340         | 350         |
|----------|--------------|---------------|--------------|-------------|-------------|
| LPCoLN   | ATA TTC TATT | TAA CAA TAA T | ACAA TCA CAT | CTTC TTCTCC | TCAAC CCGGC |
| DE177    | ATA TTC TATT | TAA CAA TAA T | ACAA TCA CAT | CTTC TTCTCC | TCAAC CCGGA |
| AR39     | ATA TTC TATT | TAA CAA TAA T | ACAA TCA CAT | CTTC TTCTCC | TCAAC CCGGA |
| CWL029   | ATA TTC TATT | TAA CAA TAA T | ACAA TCA CAT | CTTC TTCTCC | TCAAC CCGGA |
| J138     | ATA TTC TATT | TAA CAA TAA T | ACAA TCA CAT | CTTC TTCTCC | TCAAC CCGGA |
| TW183    | ATA TTC TATT | TAA CAA TAA T | ACAA TCA CAT | CTTC TTCTCC | TCAAC CCGGA |
| WA97001  | ATA TTC TATT | TAA CAA TAA T | ACAA TCA CAT | CTTC TTCTCC | TCAAC CCGGA |
| SH511    | ATA TTC TATT | TAA CAA TAA T | ACAA TCA CAT | CTTC TTCTCC | TCAAC CCGGA |
| TOR1     | ATA TTC TATT | TAA CAA TAA T | ACAA TCA CAT | CTTC TTCTCC | TCAAC CCGGA |

| Identity | 360         | 370        | 380        | 390         | 400        |
|----------|-------------|------------|------------|-------------|------------|
| LPCoLN   | TATAGAAA TG | CACTCTATGC | TGCTCCGGGG | ATTA ACTTAA | AACTAGGAGC |
| DE177    | TATAGAAA TG | CACTCTATGC | TGCTCCGGGG | ATTA ACTTAA | AACTAGGAGC |
| AR39     | TATAGAAA TG | CACTCTATGC | TGCTCCGGGG | ATTA ACTTAA | AACTAGGAGC |
| CWL029   | TATAGAAA TG | CACTCTATGC | TGCTCCGGGG | ATTA ACTTAA | AACTAGGAGC |
| J138     | TATAGAAA TG | CACTCTATGC | TGCTCCGGGG | ATTA ACTTAA | AACTAGGAGC |
| TW183    | TATAGAAA TG | CACTCTATGC | TGCTCCGGGG | ATTA ACTTAA | AACTAGGAGC |
| WA97001  | TATAGAAA TG | CACTCTATGC | TGCTCCGGGG | ATTA ACTTAA | AACTAGGAGC |
| SH511    | TATAGAAA TG | CACTCTATGC | TGCTCCGGGG | ATTA ACTTAA | AACTAGGAGC |
| TOR1     | TATAGAAA TG | CACTCTATGC | TGCTCCGGGG | ATTA ACTTAA | AACTAGGAGC |

| Identity | 410        | 420        | 430        | 440        | 450        |
|----------|------------|------------|------------|------------|------------|
| LPCoLN   | TAGACAGGGT | TATAAAATTC | TCTTTTATGA | TCCTATAGAT | CACGATCAGA |
| DE177    | AAGACAGGGT | TATAAAATTC | TCTTTTATGA | TCCTATAGAT | CACGATCAGA |
| AR39     | AAGACAGGGT | TATAAAATTC | TCTTTTATGA | TCCTATAGAT | CACGATCAGA |
| CWL029   | AAGACAGGGT | TATAAAATTC | TCTTTTATGA | TCCTATAGAT | CACGATCAGA |
| J138     | AAGACAGGGT | TATAAAATTC | TCTTTTATGA | TCCTATAGAT | CACGATCAGA |
| TW183    | AAGACAGGGT | TATAAAATTC | TCTTTTATGA | TCCTATAGAT | CACGATCAGA |
| WA97001  | AAGACAGGGT | TATAAAATTC | TCTTTTATGA | TCCTATAGAT | CACGATCAGA |
| SH511    | AAGACAGGGT | TATAAAATTC | TCTTTTATGA | TCCTATAGAT | CACGATCAGA |
| TOR1     | AAGACAGGGT | TATAAAATTC | TCTTTTATGA | TCCTATAGAT | CACGATCAGA |

| Identity | 460         | 470        | 480        | 490                | 500         |
|----------|-------------|------------|------------|--------------------|-------------|
| LPCoLN   | CGACAA CAGA | TCCTATAGTA | TTTAATTATG | AA C C C C A T C A | CCTTGGA C C |
| DE177    | CGACAA CAGA | TCCTATAGTA | TTTAATTATG | AA C C C C A T C A | CCTTGGA C C |
| AR39     | CGACAA CAGA | TCCTATAGTA | TTTAATTATG | AA C C C C A T C A | CCTTGGA C C |
| CWL029   | CGACAA CAGA | TCCTATAGTA | TTTAATTATG | AA C C C C A T C A | CCTTGGA C C |
| J138     | CGACAA CAGA | TCCTATAGTA | TTTAATTATG | AA C C C C A T C A | CCTTGGA C C |
| TW183    | CGACAA CAGA | TCCTATAGTA | TTTAATTATG | AA C C C C A T C A | CCTTGGA C C |
| WA97001  | CGACAA CAGA | TCCTATAGTA | TTTAATTATG | AA C C C C A T C A | CCTTGGA C C |
| SH511    | CGACAA CAGA | TCCTATAGTA | TTTAATTATG | AA C C C C A T C A | CCTTGGA C C |
| TOR1     | CGACAA CAGA | TCCTATAGTA | TTTAATTATG | AA C C C C A T C A | CCTTGGA C C |

| Identity | 510          | 520         | 530        | 540           | 550         |
|----------|--------------|-------------|------------|---------------|-------------|
| LPCoLN   | GTG TTG TTTT | CCGGAA TCAA | TGTAGATTCT | AA CG CAA CAA | ATCCA TTGAA |
| DE177    | GTG TTG TTTT | CCGGAA TCAA | TGTAGATTCT | AA CG CAA CAA | ATCCA TTGAA |
| AR39     | GTG TTG TTTT | CCGGAA TCAA | TGTAGATTCT | AA CG CAA CAA | ATCCA TTGAA |
| CWL029   | GTG TTG TTTT | CCGGAA TCAA | TGTAGATTCT | AA CG CAA CAA | ATCCA TTGAA |
| J138     | GTG TTG TTTT | CCGGAA TCAA | TGTAGATTCT | AA CG CAA CAA | ATCCA TTGAA |
| TW183    | GTG TTG TTTT | CCGGAA TCAA | TGTAGATTCT | AA CG CAA CAA | ATCCA TTGAA |
| WA97001  | GTG TTG TTTT | CCGGAA TCAA | TGTAGATTCT | AA CG CAA CAA | ATCCA TTGAA |
| SH511    | GTG TTG TTTT | CCGGAA TCAA | TGTAGATTCT | AA CG CAA TAA | ATCCA TTGAA |
| TOR1     | GTG TTG TTTT | CCGGAA TCAA | TGTAGATTCT | AA CG CAA CAA | ATCCA TTGAA |

| Identity | 560        | 570         | 580        | 590        | 600         |
|----------|------------|-------------|------------|------------|-------------|
| LPCoLN   | CTTCCTATCA | AAA TTTTCTA | ACTCTTCACG | ACTTGAAAGG | GG TGTGCTCG |
| DE177    | CTTCCTATCA | AAA TTTTCTA | ACTCTTCACG | ACTTGAAAGG | GG TGTGCTCG |
| AR39     | CTTCCTATCA | AAA TTTTCTA | ACTCTTCACG | ACTTGAAAGG | GG TGTGCTCG |
| CWL029   | CTTCCTATCA | AAA TTTTCTA | ACTCTTCACG | ACTTGAAAGG | GG TGTGCTCG |
| J138     | CTTCCTATCA | AAA TTTTCTA | ACTCTTCACG | ACTTGAAAGG | GG TGTGCTCG |
| TW183    | CTTCCTATCA | AAA TTTTCTA | ACTCTTCACG | ACTTGAAAGG | GG TGTGCTCG |
| WA97001  | CTTCCTATCA | AAA TTTTCTA | ACTCTTCACG | ACTTGAAAGG | GG TGTGCTCG |
| SH511    | CTTCCTATCA | AAA TTTTCTA | ACTCTTCACG | ACTTGAAAGG | GG TGTGCTCG |
| TOR1     | CTTCCTATCA | AAA TTTTCTA | ACTCTTCACG | ACTTGAAAGG | GG TGTGCTCG |

| Identity | 610         | 620        | 630         | 640        | 650         |
|----------|-------------|------------|-------------|------------|-------------|
| LPCoLN   | CTA TTGAAGA | TCGGGCTGCT | A TTTCTTGCA | AAACCCTATC | GCAAAC TGGG |
| DE177    | CTA TTGAAGA | TCGGGCTGCT | A TTTCTTGCA | AAACCCTATC | GCAAAC TGGG |
| AR39     | CTA TTGAAGA | TCGGGCTGCT | A TTTCTTGCA | AAACCCTATC | GCAAAC TGGG |
| CWL029   | CTA TTGAAGA | TCGGGCTGCT | A TTTCTTGCA | AAACCCTATC | GCAAAC TGGG |
| J138     | CTA TTGAAGA | TCGGGCTGCT | A TTTCTTGCA | AAACCCTATC | GCAAAC TGGG |
| TW183    | CTA TTGAAGA | TCGGGCTGCT | A TTTCTTGCA | AAACCCTATC | GCAAAC TGGG |
| WA97001  | CTA TTGAAGA | TCGGGCTGCT | A TTTCTTGCA | AAACCCTATC | GCAAAC TGGG |
| SH511    | CTA TTGAAGA | TCGGGCTGCT | A TTTCTTGCA | AAACCCTATC | GCAAAC TGGG |
| TOR1     | CTA TTGAAGA | TCGGGCTGCT | A TTTCTTGCA | AAACCCTATC | GCAAAC TGGG |

| Identity | 660        | 670        | 680         | 690        | 700        |
|----------|------------|------------|-------------|------------|------------|
| LPCoLN   | GGCA TCTAC | GTTTAGGAAA | CGCAGCA TTA | ATCAGGACGA | AAGGCCCGGG |
| DE177    | GGCA TCTAC | GTTTAGGAAA | CGCAGCA TTA | ATCAGGACGA | AAGGCCCGGG |
| AR39     | GGCA TCTAC | GTTTAGGAAA | CGCAGCA TTA | ATCAGGACGA | AAGGCCCGGG |
| CWL029   | GGCA TCTAC | GTTTAGGAAA | CGCAGCA TTA | ATCAGGACGA | AAGGCCCGGG |
| J138     | GGCA TCTAC | GTTTAGGAAA | CGCAGCA TTA | ATCAGGACGA | AAGGCCCGGG |
| TW183    | GGCA TCTAC | GTTTAGGAAA | CGCAGCA TTA | ATCAGGACGA | AAGGCCCGGG |
| WA97001  | GGCA TCTAC | GTTTAGGAAA | CGCAGCA TTA | ATCAGGACGA | AAGGCCCGGG |
| SH511    | GGCA TCTAC | GTTTAGGAAA | CGCAGCA TTA | ATCAGGACGA | AAGGCCCGGG |
| TOR1     | GGCA TCTAC | GTTTAGGAAA | CGCAGCA TTA | ATCAGGACGA | AAGGCCCGGG |

| Identity | 710          | 720          | 730          | 740         | 750        |
|----------|--------------|--------------|--------------|-------------|------------|
| LPCoLN   | AAG CTC CATA | AA TTTTAAATG | CA GTCGC TAT | CAA CTTTCCT | TCTATTTTAC |
| DE177    | AAG CTC CATA | AA TTTTAAATG | CAA TCGCGAT  | CAA TCTTCCT | TCTATTTTAC |
| AR39     | AAG CTC CATA | AA TTTTAAATG | CAA TCGCGAT  | CAA TCTTCCT | TCTATTTTAC |
| CWL029   | AAG CTC CATA | AA TTTTAAATG | CAA TCGCGAT  | CAA TCTTCCT | TCTATTTTAC |
| J138     | AAG CTC CATA | AA TTTTAAATG | CAA TCGCGAT  | CAA TCTTCCT | TCTATTTTAC |
| TW183    | AAG CTC CATA | AA TTTTAAATG | CAA TCGCGAT  | CAA TCTTCCT | TCTATTTTAC |
| WA97001  | AAG CTC CATA | AA TTTTAAATG | CAA TCGCGAT  | CAA TCTTCCT | TCTATTTTAC |
| SH511    | AAG CTC CATA | AA TTTTAAATG | CAA TCGCGAT  | CAA TCTTCCT | TCTATTTTAC |
| TOR1     | AAG CTC CATA | AA TTTTAAATG | CAA TCGCGAT  | CAA TCTTCCT | TCTATTTTAC |

| Identity | 760          | 770        | 780        | 790          | 800        |
|----------|--------------|------------|------------|--------------|------------|
| LPCoLN   | AA TCAG AAGC | CTCAGCTCCA | AAGTTCTGGA | TTTA TCC TAC | ATTAACAGGA |
| DE177    | AA TCAG AAGC | CTCAGCTCCA | AAGTTCTGGA | TTTA TCC TAC | ATTAACAGGA |
| AR39     | AA TCAG AAGC | CTCAGCTCCA | AAGTTCTGGA | TTTA TCC TAC | ATTAACAGGA |
| CWL029   | AA TCAG AAGC | CTCAGCTCCA | AAGTTCTGGA | TTTA TCC TAC | ATTAACAGGA |
| J138     | AA TCAG AAGC | CTCAGCTCCA | AAGTTCTGGA | TTTA TCC TAC | ATTAACAGGA |
| TW183    | AA TCAG AAGC | CTCAGCTCCA | AAGTTCTGGA | TTTA TCC TAC | ATTAACAGGA |
| WA97001  | AA TCAG AAGC | CTCAGCTCCA | AAGTTCTGGA | TTTA TCC TAC | ATTAACAGGA |
| SH511    | AA TCAG AAGC | CTCAGCTCCA | AAGTTCTGGA | TTTA TCC TAC | ATTAACAGGA |
| TOR1     | AA TCAG AAGC | CTCAGCTCCA | AAGTTCTGGA | TTTA TCC TAC | ATTAACAGGA |

|          |                                                                                 |                                                                                 |                                                                                  |                                                                                   |                                                                                   |
|----------|---------------------------------------------------------------------------------|---------------------------------------------------------------------------------|----------------------------------------------------------------------------------|-----------------------------------------------------------------------------------|-----------------------------------------------------------------------------------|
| Identity |  |  |  |  |  |
|          | 810                                                                             | 820                                                                             | 830                                                                              | 840                                                                               | 850                                                                               |
| LPCoLN   | TCC <b>G</b> CCTA TT                                                            | CTGAAGACAC                                                                      | TTCTTCTACT                                                                       | AT <b>T</b> ACTCCTCT                                                              | CAGGACCCTT                                                                        |
| DE177    | TCCACCCTA TT                                                                    | CTGAAGACAC                                                                      | TTCTTCTACT                                                                       | ATCACTCCTCT                                                                       | CAGGACCCTT                                                                        |
| AR39     | TCCACCCTA TT                                                                    | CTGAAGACAC                                                                      | TTCTTCTACT                                                                       | ATCACTCCTCT                                                                       | CAGGACCCTT                                                                        |
| CWL029   | TCCACCCTA TT                                                                    | CTGAAGACAC                                                                      | TTCTTCTACT                                                                       | ATCACTCCTCT                                                                       | CAGGACCCTT                                                                        |
| J138     | TCCACCCTA TT                                                                    | CTGAAGACAC                                                                      | TTCTTCTACT                                                                       | ATCACTCCTCT                                                                       | CAGGACCCTT                                                                        |
| TW183    | TCCACCCTA TT                                                                    | CTGAAGACAC                                                                      | TTCTTCTACT                                                                       | ATCACTCCTCT                                                                       | CAGGACCCTT                                                                        |
| WA97001  | TCCACCCTA TT                                                                    | CTGAAGACAC                                                                      | TTCTTCTACT                                                                       | ATCACTCCTCT                                                                       | CAGGACCCTT                                                                        |
| SH511    | TCCACCCTA TT                                                                    | CTGAAGACAC                                                                      | TTCTTCTACT                                                                       | ATCACTCCTCT                                                                       | CAGGACCCTT                                                                        |
| TOR1     | TCCACCCTA TT                                                                    | CTGAAGACAC                                                                      | TTCTTCTACT                                                                       | ATCACTCCTCT                                                                       | CAGGACCCTT                                                                        |

|          |                                                                                   |                                                                                   |                                                                                    |                                                                                     |                                                                                     |
|----------|-----------------------------------------------------------------------------------|-----------------------------------------------------------------------------------|------------------------------------------------------------------------------------|-------------------------------------------------------------------------------------|-------------------------------------------------------------------------------------|
| Identity |  |  |  |  |  |
|          | 860                                                                               | 870                                                                               | 880                                                                                | 890                                                                                 | 900                                                                                 |
| LPCoLN   | GACTTTTCTA                                                                        | AACGATGAAA                                                                        | ATGAAAA CCC                                                                        | CTATGATAGC                                                                          | TTAGATCTCT                                                                          |
| DE177    | GACTTTTCTA                                                                        | AACGATGAAA                                                                        | ATGAAAA CCC                                                                        | CTATGATAGC                                                                          | TTAGATCTCT                                                                          |
| AR39     | GACTTTTCTA                                                                        | AACGATGAAA                                                                        | ATGAAAA CCC                                                                        | CTATGATAGC                                                                          | TTAGATCTCT                                                                          |
| CWL029   | GACTTTTCTA                                                                        | AACGATGAAA                                                                        | ATGAAAA CCC                                                                        | CTATGATAGC                                                                          | TTAGATCTCT                                                                          |
| J138     | GACTTTTCTA                                                                        | AACGATGAAA                                                                        | ATGAAAA CCC                                                                        | CTATGATAGC                                                                          | TTAGATCTCT                                                                          |
| TW183    | GACTTTTCTA                                                                        | AACGATGAAA                                                                        | ATGAAAA CCC                                                                        | CTATGATAGC                                                                          | TTAGATCTCT                                                                          |
| WA97001  | GACTTTTCTA                                                                        | AACGATGAAA                                                                        | ATGAAAA CCC                                                                        | CTATGATAGC                                                                          | TTAGATCTCT                                                                          |
| SH511    | GACTTTTCTA                                                                        | AACGATGAAA                                                                        | ATGAAAA CCC                                                                        | CTATGATAGC                                                                          | TTA <b>A</b> ATCTCT                                                                 |
| TOR1     | GACTTTTCTA                                                                        | AACGATGAAA                                                                        | ATGAAAA CCC                                                                        | CTATGATAGC                                                                          | TTAGATCTCT                                                                          |

|          |                                                                                     |                                                                                     |                                                                                     |
|----------|-------------------------------------------------------------------------------------|-------------------------------------------------------------------------------------|-------------------------------------------------------------------------------------|
| Identity |  |  |  |
|          | 910                                                                                 | 920                                                                                 | 923                                                                                 |
| LPCoLN   | CTGAACCTCG                                                                          | AAAGGATATC                                                                          | CC                                                                                  |
| DE177    | CTGAACCTCG                                                                          | AAAGGATATC                                                                          | CC                                                                                  |
| AR39     | CTGAACCTCG                                                                          | AAAGGATATC                                                                          | CC                                                                                  |
| CWL029   | CTGAACCTCG                                                                          | AAAGGATATC                                                                          | CC                                                                                  |
| J138     | CTGAACCTCG                                                                          | AAAGGATATC                                                                          | CC                                                                                  |
| TW183    | CTGAACCTCG                                                                          | AAAGGATATC                                                                          | CC                                                                                  |
| WA97001  | CTGAACCTCG                                                                          | AAAGGATATC                                                                          | CC                                                                                  |
| SH511    | CTGAACCTCG                                                                          | AAAGGATATC                                                                          | CC                                                                                  |
| TOR1     | CTGAACCTCG                                                                          | AAAGGATATC                                                                          | CC                                                                                  |
