# Supplementary material for: Chlamydia pneumoniae Is Genetically Diverse in Animals and Appears to Have Crossed the Host Barrier to Humans on (At Least) Two Occasions
Source: PubMed Central journal article supplement (PMC2873915; doi:10.1371/journal.ppat.1000903), 2010-05-20
Supplement: ppat.1000903.s007.pdf [file ppat.1000903.s007.pdf]

| Identity   | 1            | 10           | 20                               | 30           | 40           | 50 |
|------------|--------------|--------------|----------------------------------|--------------|--------------|----|
| B10        | TAG TGG CGGA | AGGG TTAG TA | A T A C A T A - GA               | TAA TCTG CCC | TCA A CTTGGG |    |
| B26        | TAG TGG CGGA | AGGG TTAG TA | A T A C A T A - GA               | TAA TCTG CCC | TCA A CTTGGG |    |
| B37        | TAG TGG CGGA | AGGG TTAG TA | A T A C A T A - GA               | TAA TCTG CCC | TCA A CTTGGG |    |
| WBB        | TAG TGG CGGA | AGGG TTAG TA | A T A C A T A - GA               | TAA TCTG CCC | TCA A CTTGGG |    |
| EBB        | TAG TGG CGGA | AGGG TTAG TA | A T A C A T A - GA               | TAA TCTG CCC | TCA A CTTGGG |    |
| LPCoLN     | TAG TGG CGGA | AGGG TTAG TA | A T A C A T A - GA               | TAA TCTG CCC | TCA A CTTGGG |    |
| Pot37      | TAG TGG CGGA | AGGG TTAG TA | A T A C A T A - GA               | TAA TCTG CCC | TCA A CTTGGG |    |
| GBF        | TAG TGG CGGA | AGGG TTAG TA | A T A C A T A - GA               | TAA TCTG CCC | TCA A CTTGGG |    |
| 2040.3     | TAG TGG CGGA | AGGG TTAG TA | A T A C A T A - GA               | TAA TCTG CCC | TCA A CTTGGG |    |
| CPXT1      | TAG TGG CGGA | AGGG TTAG TA | A T A C A T A - GA               | TAA TCTG CCC | TCA A CTTGGG |    |
| DE177      | TAG TGG CGGA | AGGG TTAG TA | A T A C A T A - GA               | TAA TCTG CCC | TCA A CTTGGG |    |
| BMTF-type1 | TAG TGG CGGA | AGGG TTAG TA | <b>G</b> T A C A T A <b>A</b> GA | TAA TCTG CCC | TCA A CTTGGG |    |
| BMTF-type2 | TAG TGG CGGA | AGGG TTAG TA | <b>G</b> T A C A T A - GA        | TAA TCTG CCC | TCA A CTTGGG |    |
| Iguana     | TAG TGG CGGA | AGGG TTAG TA | <b>G</b> T A C A T A - GA        | TAA TCTG CCC | TCA A CTTGGG |    |
| Puffadd    | TAG TGG CGGA | AGGG TTAG TA | <b>G</b> T A C A T A <b>A</b> GA | TAA TCTG CCC | TCA A CTTGGG |    |
| N16        | TAG TGG CGGA | AGGG TTAG TA | A T A C A T A - GA               | TAA TCTG CCC | TCA A CTTGGG |    |
| AR39       | TAG TGG CGGA | AGGG TTAG TA | <b>G</b> T A C A T A - GA        | TAA TCTG CCC | TCA A CTTGGG |    |
| CWL029     | TAG TGG CGGA | AGGG TTAG TA | <b>G</b> T A C A T A - GA        | TAA TCTG CCC | TCA A CTTGGG |    |
| J138       | TAG TGG CGGA | AGGG TTAG TA | <b>G</b> T A C A T A - GA        | TAA TCTG CCC | TCA A CTTGGG |    |
| TW183      | TAG TGG CGGA | AGGG TTAG TA | <b>G</b> T A C A T A - GA        | TAA TCTG CCC | TCA A CTTGGG |    |
| IOL207     | TAG TGG CGGA | AGGG TTAG TA | <b>G</b> T A C A T A GA          | TAA TCTG CCC | TCA A CTTGGG |    |
| LKK1       | TAG TGG CGGA | AGGG TTAG TA | <b>G</b> T A C A T A - GA        | TAA TCTG CCC | TCA A CTTGGG |    |
| TOR1       | TAG TGG CGGA | AGGG TTAG TA | <b>G</b> T A C A T A - GA        | TAA TCTG CCC | TCA A CTTGGG |    |
| WA97001    | TAG TGG CGGA | AGGG TTAG TA | <b>G</b> T A C A T A - GA        | TAA TCTG CCC | TCA A CTTGGG |    |
| 1979       | TAG TGG CGGA | AGGG TTAG TA | A T A C A T A - GA               | TAA TCTG CCC | TCA A CTTGGG |    |
| SH511      | TAG TGG CGGA | AGGG TTAG TA | A T A C A T A - GA               | TAA TCTG CCC | TCA A CTTGGG |    |

| Identity   | 60                         | 70           | 80                  | 90                        | 100                        |
|------------|----------------------------|--------------|---------------------|---------------------------|----------------------------|
| B10        | AA TAA CGG TT              | GGAAA CGA TC | G C T A A T A C C G | AA T - - G T A G T        | G T A A T T A G G C        |
| B26        | AA TAA CGG TT              | GGAAA CGA TC | G C T A A T A C C G | AA T - - G T A G T        | G T A A T T A G G C        |
| B37        | AA TAA CGG TT              | GGAAA CGA TC | G C T A A T A C C G | AA T - - G T A G T        | G T A A T T A G G C        |
| WBB        | AA TAA CGG TT              | GGAAA CGA TC | G C T A A T A C C G | AA T - - G T A G T        | G T A A T T A G G C        |
| EBB        | AA TAA CGG TT              | GGAAA CGA TC | G C T A A T A C C G | AA T - - G T A G T        | G T A A T T A G G C        |
| LPCoLN     | AA TAA CGG TT              | GGAAA CGA TC | G C T A A T A C C G | AA T - - G T A G T        | G T A A T T A G G C        |
| Pot37      | AA TAA CGG TT              | GGAAA CGA TC | G C T A A T A C C G | AA T - - G T A G T        | G T A A T T A G G C        |
| GBF        | AA TAA CGG TT              | GGAAA CGA TC | G C T A A T A C C G | AA T - - G T A G T        | G T A A T T A G G C        |
| 2040.3     | AA TAA CGG TT              | GGAAA CGA TC | G C T A A T A C C G | AA T - - G T A G T        | G T A A T T A G G C        |
| CPXT1      | AA TAA CGG TT              | GGAAA CGA TC | G C T A A T A C C G | AA T - - G T A G T        | G T A A T T A G G C        |
| DE177      | AA TAA CGG TT              | GGAAA CGA TC | G C T A A T A C C G | AA T <b>TT</b> G T A G T  | G T A A T T A G G C        |
| BMTF-type1 | <b>G</b> A T A A C G G T T | GGAAA CGA TC | G C T A A T A C C G | AA T - - G T A G T        | G T A A T T A G G C        |
| BMTF-type2 | <b>G</b> A T A A C G G T T | GGAAA CGA TC | G C T A A T A C C G | AA T - - G T A G T        | G T A A T T A G G C        |
| Iguana     | <b>G</b> A T A A C G G T T | GGAAA CGA TC | G C T A A T A C C G | AA T - - G T A G T        | G T A A T T A G G C        |
| Puffadd    | <b>G</b> A T A A C G G T T | GGAAA CGA TC | G C T A A T A C C G | AA T - - G T A G T        | G T A A T T A G G C        |
| N16        | AA TAA CGG TT              | GGAAA CGA TC | G C T A A T A C C G | AA T - - G T <b>G</b> G T | G T A A T T A G G <b>A</b> |
| AR39       | <b>G</b> A T A A C G G T T | GGAAA CGA TC | G C T A A T A C C G | AA T - - G T A G T        | G T A A T T A G G C        |
| CWL029     | <b>G</b> A T A A C G G T T | GGAAA CGA TC | G C T A A T A C C G | AA T - - G T A G T        | G T A A T T A G G C        |
| J138       | <b>G</b> A T A A C G G T T | GGAAA CGA TC | G C T A A T A C C G | AA T - - G T A G T        | G T A A T T A G G C        |
| TW183      | <b>G</b> A T A A C G G T T | GGAAA CGA TC | G C T A A T A C C G | AA T - - G T A G T        | G T A A T T A G G C        |
| IOL207     | <b>G</b> A T A A C G G T T | GGAAA CGA TC | G C T A A T A C C G | AA T - - G T A G T        | G T A A T T A G G C        |
| LKK1       | <b>G</b> A T A A C G G T T | GGAAA CGA TC | G C T A A T A C C G | AA T - - G T A G T        | G T A A T T A G G C        |
| TOR1       | <b>G</b> A T A A C G G T T | GGAAA CGA TC | G C T A A T A C C G | AA T - - G T A G T        | G T A A T T A G G C        |
| WA97001    | <b>G</b> A T A A C G G T T | GGAAA CGA TC | G C T A A T A C C G | AA T - - G T A G T        | G T A A T T A G G C        |
| 1979       | AA TAA CGG TT              | GGAAA CGA TC | G C T A A T A C C G | AA T - - G T A G T        | G T A A T T A G G C        |
| SH511      | AA TAA CGG TT              | GGAAA CGA TC | G C T A A T A C C G | AA T - - G T A G T        | G T A A T T A G G C        |

| Identity   | 110         | 120       | 130        | 140         | 150        |
|------------|-------------|-----------|------------|-------------|------------|
| B10        | ATCTAATAATA | TATTAAGAA | GGGGATCTTC | GGACCTTTTCG | GTTGAGGAAG |
| B26        | ATCTAATAATA | TATTAAGAA | GGGGATCTTC | GGACCTTTTCG | GTTGAGGAAG |
| B37        | ATCTAATAATA | TATTAAGAA | GGGGATCTTC | GGACCTTTTCG | GTTGAGGAAG |
| WBB        | ATCTAATAATA | TATTAAGAA | GGGGATCTTC | GGACCTTTTCG | GTTGAGGAAG |
| EBB        | ATCTAATAATA | TATTAAGAA | GGGGATCTTC | GGACCTTTTCG | GTTGAGGAAG |
| LPCoLN     | ATCTAATAATA | TATTAAGAA | GGGGATCTTC | GGACCTTTTCG | GTTGAGGAAG |
| Pot37      | ATCTAATAATA | TATTAAGAA | GGGGATCTTC | GGACCTTTTCG | GTTGAGGAAG |
| GBF        | ATCTAATAATA | TATTAAGAA | GGGGATCTTC | GGACCTTTTCG | GTTGAGGAAG |
| 2040.3     | ATCTAATAATA | TATTAAGAA | GGGGATCTTC | GGACCTTTTCG | GTTGAGGAAG |
| CPXT1      | ATCTAATAATA | TATTAAGAA | GGGGATCTTC | GGACCTTTTCG | GTTGAGGAAG |
| DE177      | ATCTAATAATA | TATTAAGAA | GGGGATCTTC | GGACCTTTTCG | GTTGAGGAAG |
| BMTF-type1 | ATCTAATAATA | TATTAAGAA | GGGGATCTTC | GGACCTTTTCG | GTTGAGGAAG |
| BMTF-type2 | ATCTAATAATA | TATTAAGAA | GGGGATCTTC | GGACCTTTTCG | GTTGAGGAAG |
| Iguana     | ATCTAATAATA | TATTAAGAA | GGGGATCTTC | GGACCTTTTCG | GTTGAGGAAG |
| Puffadd    | ATCTAATAATA | TATTAAGAA | GGGGATCTTC | GGACCTTTTCG | GTTGAGGAAG |
| N16        | ATCTAATAATA | TATTAAGAA | GGGGATCTTC | GGACCTTTTCG | GTTGAGGAAG |
| AR39       | ATCTAATAATA | TATTAAGAA | GGGGATCTTC | GGACCTTTTCG | GTTGAGGAAG |
| CWL029     | ATCTAATAATA | TATTAAGAA | GGGGATCTTC | GGACCTTTTCG | GTTGAGGAAG |
| J138       | ATCTAATAATA | TATTAAGAA | GGGGATCTTC | GGACCTTTTCG | GTTGAGGAAG |
| TW183      | ATCTAATAATA | TATTAAGAA | GGGGATCTTC | GGACCTTTTCG | GTTGAGGAAG |
| IOL207     | ATCTAATAATA | TATTAAGAA | GGGGATCTTC | GGACCTTTTCG | GTTGAGGAAG |
| LKK1       | ATCTAATAATA | TATTAAGAA | GGGGATCTTC | GGACCTTTTCG | GTTGAGGAAG |
| TOR1       | ATCTAATAATA | TATTAAGAA | GGGGATCTTC | GGACCTTTTCG | GTTGAGGAAG |
| WA97001    | ATCTAATAATA | TATTAAGAA | GGGGATCTTC | GGACCTTTTCG | GTTGAGGAAG |
| 1979       | ATCTAATAATA | TATTAAGAA | GGGGATCTTC | GGACCTTTTCG | GTTGAGGAAG |
| SH511      | ATCTAATAATA | TATTAAGAA | GGGGATCTTC | GGACCTTTTCG | GTTGAGGAAG |

| Identity   | 160        | 170        | 180        | 190        | 200        |
|------------|------------|------------|------------|------------|------------|
| B10        | AGTTTATGCG | ATATCAGCTT | GTTGGTGGGG | TAAAAGCCCA | CCAAGGCGAT |
| B26        | AGTTTATGCG | ATATCAGCTT | GTTGGTGGGG | TAAAAGCCCA | CCAAGGCGAT |
| B37        | AGTTTATGCG | ATATCAGCTT | GTTGGTGGGG | TAAAAGCCCA | CCAAGGCGAT |
| WBB        | AGTTTATGCG | ATATCAGCTT | GTTGGTGGGG | TAAAAGCCCA | CCAAGGCGAT |
| EBB        | AGTTTATGCG | ATATCAGCTT | GTTGGTGGGG | TAAAAGCCCA | CCAAGGCGAT |
| LPCoLN     | AGTTTATGCG | ATATCAGCTT | GTTGGTGGGG | TAAAAGCCCA | CCAAGGCGAT |
| Pot37      | AGTTTATGCG | ATATCAGCTT | GTTGGTGGGG | TAAAAGCCCA | CCAAGGCGAT |
| GBF        | AGTTTATGCG | ATATCAGCTT | GTTGGTGGGG | TAAAAGCCCA | CCAAGGCGAT |
| 2040.3     | AGTTTATGCG | ATATCAGCTT | GTTGGTGGGG | TAAAAGCCCA | CCAAGGCGAT |
| CPXT1      | AGTTTATGCG | ATATCAGCTT | GTTGGTGGGG | TAAAAGCCCA | CCAAGGCGAT |
| DE177      | AGTTTATGCG | ATATCAGCTT | GTTGGTGGGG | TAAAAGCCCA | CCAAGGCGAT |
| BMTF-type1 | AGTTTATGCG | ATATCAGCTT | GTTGGTGGGG | TAAAAGCCCA | CCAAGGCGAT |
| BMTF-type2 | AGTTTATGCG | ATATCAGCTT | GTTGGTGGGG | TAAAAGCCCA | CCAAGGCGAT |
| Iguana     | AGTTTATGCG | ATATCAGCTT | GTTGGTGGGG | TAAAAGCCCA | CCAAGGCGAT |
| Puffadd    | AGTTTATGCG | ATATCAGCTT | GTTGGTGGGG | TAAAAGCCCA | CCAAGGCGAT |
| N16        | AGTTTATGCG | ATATCAGCTT | GTTGGTGGGG | TAAAAGCCCA | CCAAGGCGAT |
| AR39       | AGTTTATGCG | ATATCAGCTT | GTTGGTGGGG | TAAAAGCCCA | CCAAGGCGAT |
| CWL029     | AGTTTATGCG | ATATCAGCTT | GTTGGTGGGG | TAAAAGCCCA | CCAAGGCGAT |
| J138       | AGTTTATGCG | ATATCAGCTT | GTTGGTGGGG | TAAAAGCCCA | CCAAGGCGAT |
| TW183      | AGTTTATGCG | ATATCAGCTT | GTTGGTGGGG | TAAAAGCCCA | CCAAGGCGAT |
| IOL207     | AGTTTATGCG | ATATCAGCTT | GTTGGTGGGG | TAAAAGCCCA | CCAAGGCGAT |
| LKK1       | AGTTTATGCG | ATATCAGCTT | GTTGGTGGGG | TAAAAGCCCA | CCAAGGCGAT |
| TOR1       | AGTTTATGCG | ATATCAGCTT | GTTGGTGGGG | TAAAAGCCCA | CCAAGGCGAT |
| WA97001    | AGTTTATGCG | ATATCAGCTT | GTTGGTGGGG | TAAAAGCCCA | CCAAGGCGAT |
| 1979       | AGTTTATGCG | ATATCAGCTT | GTTGGTGGGG | TAAAAGCCCA | CCAAGGCGAT |
| SH511      | AGTTTATGCG | ATATCAGCTT | GTTGGTGGGG | TAAAAGCCCA | CCAAGGCGAT |

| Identity   | 210        | 215   |
|------------|------------|-------|
| B10        | GACGTCTAGG | CGGAT |
| B26        | GACGTCTAGG | CGGAT |
| B37        | GACGTCTAGG | CGGAT |
| WBB        | GACGTCTAGG | CGGAT |
| EBB        | GACGTCTAGG | CGGAT |
| LPCoLN     | GACGTCTAGG | CGGAT |
| Pot37      | GACGTCTAGG | CGGAT |
| GBF        | GACGTCTAGG | CGGAT |
| 2040.3     | GACGTCTAGG | CGGAT |
| CPXT1      | GACGTCTAGG | CGGAT |
| DE177      | GACGTCTAGG | CGGAT |
| BMTF-type1 | GACGTCTAGG | CGGAT |
| BMTF-type2 | GACGTCTAGG | CGGAT |
| Iguana     | GACGTCTAGG | CGGAT |
| Puffadd    | GACGTCTAGG | CGGAT |
| N16        | GACGTCTAGG | CGGAT |
| AR39       | GACGTCTAGG | CGGAT |
| CWL029     | GACGTCTAGG | CGGAT |
| J138       | GACGTCTAGG | CGGAT |
| TW183      | GACGTCTAGG | CGGAT |
| IOL207     | GACGTCTAGG | CGGAT |
| LKK1       | GACGTCTAGG | CGGAT |
| TOR1       | GACGTCTAGG | CGGAT |
| WA97001    | GACGTCTAGG | CGGAT |
| 1979       | GACGTCTAGG | CGGAT |
| SH511      | GACGTCTAGG | CGGAT |
