# Supplementary material for: Chlamydia pneumoniae Is Genetically Diverse in Animals and Appears to Have Crossed the Host Barrier to Humans on (At Least) Two Occasions
Source: PubMed Central journal article supplement (PMC2873915; doi:10.1371/journal.ppat.1000903), 2010-05-20
Supplement: ppat.1000903.s015.pdf [file ppat.1000903.s015.pdf]

|          | 1            | 10         | 20         | 30         | 40           | 50 |
|----------|--------------|------------|------------|------------|--------------|----|
| Identity |              |            |            |            |              |    |
| B26      | CAG CCTCA CT | TTCAGCAAAG | AAAAGTCATA | CCAAGAAAAC | CA CTC CAGGT |    |
| LPCoLN   | CAG CCTCA CT | TTCAGCAAAG | AAAAGTCATA | CCAAGAAAAC | CA CTC CAGGT |    |
| DE177    | CAG CCTCA CT | TTCAGCAAAG | AAAAGTCATA | CCAAGAAAAC | CA CTC CAGGT |    |
| AR39     | CAG CCTCA CT | TTCAGCAAAG | AAAAGTCATA | CCAAGAAAAC | CA CTC CAGGT |    |
| CWL029   | CAG CCTCA CT | TTCAGCAAAG | AAAAGTCATA | CCAAGAAAAC | CA CTC CAGGT |    |
| J138     | CAG CCTCA CT | TTCAGCAAAG | AAAAGTCATA | CCAAGAAAAC | CA CTC CAGGT |    |
| TW183    | CAG CCTCA CT | TTCAGCAAAG | AAAAGTCATA | CCAAGAAAAC | CA CTC CAGGT |    |
| TOR1     | CAG CCTCA CT | TTCAGCAAAG | AAAAGTCATA | CCAAGAAAAC | CA CTC CAGGT |    |
| WA97001  | CAG CCTCA CT | TTCAGCAAAG | AAAAGTCATA | CCAAGAAAAC | CA CTC CAGGT |    |
| 1979     | CAG CCTCA CT | TTCAGCAAAG | AAAAGTCATA | CCAAGAAAAC | CA CTC CAGGT |    |
| SH511    | CAG CCTCA CT | TTCAGCAAAG | AAAAGTCATA | CCAAGAAAAC | CA CTC CAGGT |    |

|          | 60         | 70         | 80         | 90         | 100         |
|----------|------------|------------|------------|------------|-------------|
| Identity |            |            |            |            |             |
| B26      | TCTATCCCCA | GTAAAGTCTT | CTCTAAATTC | GACGCAACCC | AAGATAAAAAC |
| LPCoLN   | TCTATCCCCA | GTAAAGTCTT | CTCTAAATTC | GACGCAACCC | AAGATAAAAAC |
| DE177    | TCTATCCCCA | GTAAAGTCTT | CTCTAAATTC | GACGCAACCC | AAGATAAAAAC |
| AR39     | TCTATCCCCA | GTAAAGTCTT | CTCTAAATTC | GACGCAACCC | AAGATAAAAAC |
| CWL029   | TCTATCCCCA | GTAAAGTCTT | CTCTAAATTC | GACGCAACCC | AAGATAAAAAC |
| J138     | TCTATCCCCA | GTAAAGTCTT | CTCTAAATTC | GACGCAACCC | AAGATAAAAAC |
| TW183    | TCTATCCCCA | GTAAAGTCTT | CTCTAAATTC | GACGCAACCC | AAGATAAAAAC |
| TOR1     | TCTATCCCCA | GTAAAGTCTT | CTCTAAATTC | GACGCAACCC | AAGATAAAAAC |
| WA97001  | TCTATCCCCA | GTAAAGTCTT | CTCTAAATTC | GACGCAACCC | AAGATAAAAAC |
| 1979     | TCTATCCCCA | GTAAAGTCTT | CTCTAAATTC | GACGCAACCC | AAGATAAAAAC |
| SH511    | TCTATCCCCA | GTAAAGTCTT | CTCTAAATTC | GACGCAACCC | AAGATAAAAAC |

|          | 110        | 120        | 130        | 140         | 150        |
|----------|------------|------------|------------|-------------|------------|
| Identity |            |            |            |             |            |
| B26      | TTTCCAAAAG | ACTTCAGGAT | CCGCATTCCC | AGCAAAAACCT | ACCACCCTGA |
| LPCoLN   | TTTCCAAAAG | ACTTCAGGAT | CCGCATTCCC | AGCAAAAACCT | ACCACCCTGA |
| DE177    | TTTCCAAAAG | ACTTCAGGAT | CCGCATTCCC | AGCAAAAACCT | ACCACCCTGA |
| AR39     | TTTCCAAAAG | ACTTCAGGAT | CCGCATTCCC | AGCAAAAACCT | ACCACCCTGA |
| CWL029   | TTTCCAAAAG | ACTTCAGGAT | CCGCATTCCC | AGCAAAAACCT | ACCACCCTGA |
| J138     | TTTCCAAAAG | ACTTCAGGAT | CCGCATTCCC | AGCAAAAACCT | ACCACCCTGA |
| TW183    | TTTCCAAAAG | ACTTCAGGAT | CCGCATTCCC | AGCAAAAACCT | ACCACCCTGA |
| TOR1     | TTTCCAAAAG | ACTTCAGGAT | CCGCATTCCC | AGCAAAAACCT | ACCACCCTGA |
| WA97001  | TTTCCAAAAG | ACTTCAGGAT | CCGCATTCCC | AGCAAAAACCT | ACCACCCTGA |
| 1979     | TTTCCAAAAG | ACTTCAGGAT | CCGCATTCCC | AGCAAAAACCT | ACCACCCTGA |
| SH511    | TTTCCAAAAG | ACTTCAGGAT | CCGCATTCCC | AGCAAAAACCT | ACCACCCTGA |

|          | 160        | 170        | 180        | 190        | 200        |
|----------|------------|------------|------------|------------|------------|
| Identity |            |            |            |            |            |
| B26      | AAGAACTGGA | AGAGAGAAAA | AAACCTCGAC | CAGAGCGTAG | AACTACTGCC |
| LPCoLN   | AAGAACTGGA | AGAGAGAAAA | AAACCTCGAC | CAGAGCGTAG | AACTACTGCC |
| DE177    | AAGAACTGGA | AGAGAGAAAA | AAACCTCGAC | CAGAGCGTAG | AACTACTGCC |
| AR39     | AAGAACTGGA | AGAGAGAAAA | AAACCTCGAC | CAGAGCGTAG | AACTACTGCC |
| CWL029   | AAGAACTGGA | AGAGAGAAAA | AAACCTCGAC | CAGAGCGTAG | AACTACTGCC |
| J138     | AAGAACTGGA | AGAGAGAAAA | AAACCTCGAC | CAGAGCGTAG | AACTACTGCC |
| TW183    | AAGAACTGGA | AGAGAGAAAA | AAACCTCGAC | CAGAGCGTAG | AACTACTGCC |
| TOR1     | AAGAACTGGA | AGAGAGAAAA | AAACCTCGAC | CAGAGCGTAG | AACTACTGCC |
| WA97001  | AAGAACTGGA | AGAGAGAAAA | AAACCTCGAC | CAGAGCGTAG | AACTACTGCC |
| 1979     | AAGAACTGGA | AGAGAGAAAA | AAACCTCGAC | CAGAGCGTAG | AACTACTGCC |
| SH511    | AAGAACTGGA | AGAGAGAAAA | AAACCTCGAC | CAGAGCGTAG | AACTACTGCC |

Identity 210 220 230 240 250

B26 GATGTA AAAA GATCCC CACG CTTCTT ACCA AACAAGAAG TCGAAGAGCC  
 LPCoLN GATGTA AAAA GATCCC CACG CTTCTT ACCA AACAAGAAG TCGAAGAGCC  
 DE177 GATGTA AAAA GATCCC CACG CTTCTT ACCA AACAAGAAG TCGAAGAGCC  
 AR39 GATGTA AAAA GATCCC CACG CTTCTT ACCA ACACAAGAAG TCGAAGAGCC  
 CWL029 GATGTA AAAA GATCCC CACG CTTCTT ACCA ACACAAGAAG TCGAAGAGCC  
 J138 GATGTA AAAA GATCCC CACG CTTCTT ACCA ACACAAGAAG TCGAAGAGCC  
 TW183 GATGTA AAAA GATCCC CACG CTTCTT ACCA ACACAAGAAG TCGAAGAGCC  
 TOR1 GATGTA AAAA GATCCC CACG CTTCTT ACCA ACACAAGAAG TCGAAGAGCC  
 WA97001 GATGTA AAAA GATCCC CACG CTTCTT ACCA ACACAAGAAG TCGAAGAGCC  
 1979 GATGTA AAAA GATCCC CACG CTTCTT ACCA AACAAGAAG TCGAAGAGCC  
 SH511 GATGTA AAAA GATCCC CACG CTTCTT ACCA AACAAGAAG TCGAAGAGCC

Identity 260 270 280 290 300

B26 TGTACCTGCC GCCTCTAAAG AAATAATTAGA TAGTATACAG GTTTGGGAAG  
 LPCoLN TGTACCTGCC GCCTCTAAAG AAATAATTAGA TAGTATACAG GTTTGGGAAG  
 DE177 TGTACCTGCC GCCTCTAAAG AAATAATTAGA TAGTATACAG GTTTGGGAAG  
 AR39 TGTACCTGCC GCCTCTAAAG AACAAATTAGA TAGTATACAG GTTTGGGAAG  
 CWL029 TGTACCTGCC GCCTCTAAAG AACAAATTAGA TAGTATACAG GTTTGGGAAG  
 J138 TGTACCTGCC GCCTCTAAAG AACAAATTAGA TAGTATACAG GTTTGGGAAG  
 TW183 TGTACCTGCC GCCTCTAAAG AACAAATTAGA TAGTATACAG GTTTGGGAAG  
 TOR1 TGTACCTGCC GCCTCTAAAG AACAAATTAGA TAGTATACAG GTTTGGGAAG  
 WA97001 TGTACCTGCC GCCTCTAAAG AACAAATTAGA TAGTATACAG GTTTGGGAAG  
 1979 TGTACCTGCC GCCTCTAAAG AAATAATTAGA TAGTATACAG GTTTGGGAAG  
 SH511 TGTACCTGCC GCCTCTAAAG AAATAATTAGA TAGTATACAG GTTTGGGAAG

Identity 310 320 330 340 350

B26 AAAAACAAAA TTAGCTCGC AGAGCCGTAA ATGCTATCAA TCTGAGTATA  
 LPCoLN AAAAACAAAA TTAGCTCGC AGAGCCGTAA ATGCTATCAA TCTGAGTATA  
 DE177 AAAAACAAAA TTAGCTCGC AGAGCCGTAA ATGCTATCAA TCTGAGTATA  
 AR39 AAAAACAAAA TTAGCTCGC AGAGCCGTAA ATGCTATCAA TCTGAGTATA  
 CWL029 AAAAACAAAA TTAGCTCGC AGAGCCGTAA ATGCTATCAA TCTGAGTATA  
 J138 AAAAACAAAA TTAGCTCGC AGAGCCGTAA ATGCTATCAA TCTGAGTATA  
 TW183 AAAAACAAAA TTAGCTCGC AGAGCCGTAA ATGCTATCAA TCTGAGTATA  
 TOR1 AAAAACAAAA TTAGCTCGC AGAGCCGTAA ATGCTATCAA TCTGAGTATA  
 WA97001 AAAAACAAAA TTAGCTCGC AGAGCCGTAA ATGCTATCAA TCTGAGTATA  
 1979 AAAAACAAAA TTAGCTCGC AGAGCCGTAA ATGCTATCAA TCTGAGTATA  
 SH511 AAAAACAAAA TTAGCTCGC AGAGCCGTAA ATGCTATCAA TCTGAGTATA

| Identity | 360         | 370        | 380        | 390        | 400        |
|----------|-------------|------------|------------|------------|------------|
| B26      | AAAAAA CAAC | TCGAAGAGCA | AACCTCCACA | GTTACAGAGA | AAGACGTCCA |
| LPCoLN   | AAAAAA CAAC | TCGAAGAGCA | AACCTCCACA | GTTACAGAGA | AAGACGTCCA |
| DE177    | AAAAAA CAAC | TCGAAGAGCA | AACCTCCACA | GTTACAGAGA | AAGACGTCCA |
| AR39     | AAAAAA CAAC | TCGAAGAGCA | AACCTCCACA | GTTACAGAGA | AAGACGTCCA |
| CWL029   | AAAAAA CAAC | TCGAAGAGCA | AACCTCCACA | GTTACAGAGA | AAGACGTCCA |
| J138     | AAAAAA CAAC | TCGAAGAGCA | AACCTCCACA | GTTACAGAGA | AAGACGTCCA |
| TW183    | AAAAAA CAAC | TCGAAGAGCA | AACCTCCACA | GTTACAGAGA | AAGACGTCCA |
| TOR1     | AAAAAA CAAC | TCGAAGAGCA | AACCTCCACA | GTTACAGAGA | AAGACGTCCA |
| WA97001  | AAAAAA CAAC | TCGAAGAGCA | AACCTCCACA | GTTACAGAGA | AAGACGTCCA |
| 1979     | AAAAAA CAAC | TCGAAGAGCA | AACCTCCACA | GTTACAGAGA | AAGACGTCCA |
| SH511    | AAAAAA CAAC | TCGAAGAGCA | AACCTCCACA | GTTACAGAGA | AAGACGTCCA |

| Identity | 410         | 420          | 430         | 440        | 450        |
|----------|-------------|--------------|-------------|------------|------------|
| B26      | ACCTAAAA CA | CAAGCAACAC C | CACACGCTGC  | GAAGAAAAAC | GTTGCAAGTC |
| LPCoLN   | ACCTAAAA CA | CAAGCAACAC C | CACACGCTGC  | GAAGAAAAAC | GTTGCAAGTC |
| DE177    | ACCTAAAA CA | CAAGCAACAC C | CACACGCTTTC | GAAGAAAAAC | GTTGCAAGTC |
| AR39     | ACCTAAAA CA | CAAGCAACAC C | CACACGCTTTC | GAAGAAAAAC | GTTGCAAGTC |
| CWL029   | ACCTAAAA CA | CAAGCAACAC C | CACACGCTTTC | GAAGAAAAAC | GTTGCAAGTC |
| J138     | ACCTAAAA CA | CAAGCAACAC C | CACACGCTTTC | GAAGAAAAAC | GTTGCAAGTC |
| TW183    | ACCTAAAA CA | CAAGCAACAC C | CACACGCTTTC | GAAGAAAAAC | GTTGCAAGTC |
| TOR1     | ACCTAAAA CA | CAAGCAACAC C | CACACGCTTTC | GAAGAAAAAC | GTTGCAAGTC |
| WA97001  | ACCTAAAA CA | CAAGCAACAC C | CACACGCTTTC | GAAGAAAAAC | GTTGCAAGTC |
| 1979     | ACCTAAAA CA | CAAGCAACAC C | CACACGCTTTC | GAAGAAAAAC | GTTGCAAGTC |
| SH511    | ACCTAAAA CA | CAAGCAACAC C | CACACGCTTTC | GAAGAAAAAC | GTTGCAAGTC |

| Identity | 460         | 470        | 480        | 482 |
|----------|-------------|------------|------------|-----|
| B26      | CTTCGACC TC | TATGCCAGGA | ATCGAGAAAG | CA  |
| LPCoLN   | CTTCGACC TC | TATGCCAGGA | ATCGAGAAAG | CA  |
| DE177    | CTTCGACC TC | TATGCCAGGA | ATCGAGAAAG | CA  |
| AR39     | CTTCGACC TC | TATGCCAGGA | ATCGAGAAAG | CA  |
| CWL029   | CTTCGACC TC | TATGCCAGGA | ATCGAGAAAG | CA  |
| J138     | CTTCGACC TC | TATGCCAGGA | ATCGAGAAAG | CA  |
| TW183    | CTTCGACC TC | TATGCCAGGA | ATCGAGAAAG | CA  |
| TOR1     | CTTCGACC TC | TATGCCAGGA | ATCGAGAAAG | CA  |
| WA97001  | CTTCGACC TC | TATGCCAGGA | ATCGAGAAAG | CA  |
| 1979     | CTTCGACC TC | TATGCCAGGA | ATCGAGAAAG | CA  |
| SH511    | CTTCGACC TC | TATGCCAGGA | ATCGAGAAAG | CA  |
